# Supplementary material for: Multi-omics of 34 colorectal cancer cell lines - a resource for biomedical studies
Source: Mol Cancer. 2017 Jul 6;16:116. doi: 10.1186/s12943-017-0691-y (PMC5498998; doi:10.1186/s12943-017-0691-y)
Supplement: Supplementary file 1 — Supplementary tables. (XLSX 4615 kb) [file 12943_2017_691_MOESM1_ESM.xlsx]

## Sheet: Table_S1
Materials
Cell line name	Primary tumor site	Origin	Gender	Age	Stage	Supplier	Supplier ID	MSI status	Percent of the genome affected by copy number aberrations	CIMP status	Expression phenotype	Consensus molecular subtype (CMS)	Included in statistical analyses*	Analyzed by targeted sequencing	Growth medium†	% FBS	Relevant references
CaCo2	colon	NA				ATCC	HTB-37	MSS	47	CIMP-	undiff	CMS4	Yes	Yes	EMEM	20	1.2
CL-11	descending colon	Primary tumor			TNM 3	DSMZ	ACC 467	MSS	18	CIMP+	undiff	CMS4	Yes	No	DMEM/F-12	10	3
CL-34	ascending colon	Primary tumor	Female		TNM 2	DSMZ	ACC 520	MSI	7	CIMP+	colon-like	CMS3	Yes	No	DMEM/F-12	10	3
CL-40	ascending colon	Primary tumor	Female		TNM 3	DSMZ	ACC 535	MSS	12	CIMP+	colon-like	CMS3	Yes	No	DMEM/F-12	10	3
Co115	ascending colon	Primary tumor	Female	77	Dukes’ C	INSERM	R. Hamelin, Paris	MSI	5	CIMP+	undiff	CMS1	Yes	Yes	DMEM/F-12	10	4
Colo205	colon	Ascites fluid	Male			ATCC	CCL-222	MSS	45	CIMP+	colon-like	CMS1	Yes	Yes	RPMI 1640	15	5
Colo320	sigmoid colon	Primary tumor	Female	55		DSMZ	ACC 144	MSS	28	CIMP-	neuroendocrine	NA	Yes	Yes	DMEM/F-12	10	6
Colo678	colon	Metastatic lymph node	Male	69		DSMZ	ACC 194	MSS	48	CIMP+	undiff	CMS4	Yes	No	DMEM/F-12	10	Not published
DLD-1	colon	Unknown	Male			ATCC	CCL-221	MSI	8	CIMP+	undiff	CMS1	No	Yes	RPMI 1640	15	7,8,9,10,11
EB	colonic carcinoma	Primary tumor				INSERM	R. Hamelin, Paris	MSS	29	CIMP+	colon-like	CMS2	Yes	Yes	DMEM/F-12	10	12,25
FRI	colonic carcinoma	Primary tumor				INSERM	R. Hamelin, Paris	MSS	33	CIMP-	colon-like	CMS2	Yes	Yes	DMEM/F-12	10	12.13
HCC2998	colon	Unknown				NCI60		MSS	10	CIMP-	colon-like	CMS1	Yes	Yes	RPMI 1640	15	14
HCT116	ascending colon	Primary tumor	Male	48	Dukes’ D	ATCC	CCL-247	MSI	7	CIMP+	undiff	CMS4	Yes	Yes	DMEM/F-12	10	12,15,16
HCT15	colon	Unknown	Male			ATCC	CCL-225	MSI	0	CIMP+	undiff	CMS1	Yes	Yes	DMEM/F-12	10	7,8,9,10,11
HT29	colon	Primary tumor	Female	44	Dukes’ C	ATCC	HTB-38	MSS	43	CIMP+	colon-like	CMS3	Yes	Yes	DMEM/F-12	10	17
IS1	ascending colon	Primary tumor			Dukes’ C	INSERM	R. Hamelin, Paris	MSS	45	CIMP-	undiff	CMS4	Yes	Yes	DMEM/F-12	10	18
IS3	ascending colon	Peritoneal metastasis			Dukes’ C	INSERM	R. Hamelin, Paris	MSS	34	CIMP-	colon-like	CMS2	No	Yes	DMEM/F-12	15	18
KM12	colon	Primary tumor			Dukes’ B(2)	NCI60		MSI	12	CIMP+	colon-like	CMS1	Yes	Yes	RPMI 1640	15	19,20
LoVo	colon	Left supraclavicular region	Male	56	Dukes’ C	ATCC	CCL-229	MSI	9	CIMP-	undiff	CMS1	Yes	Yes	DMEM/F-12	10	21
LS1034	caecum	Primary tumor	Male	54	Dukes’ C	ATCC	CRL-2158	MSS	42	CIMP-	colon-like	CMS2	Yes	Yes	DMEM/F-12	10	22
LS174T	colon	Unknown	Female	58		ATCC	CL-188	MSI	9	CIMP-	colon-like	CMS3	Yes	Yes	DMEM/F-12	10	23
NCI-H508	caecum	Abdominal wall metastasis	Male	55		ATCC	CCL-253	MSS	33	CIMP-	colon-like	CMS2	Yes	Yes	RPMI 1640	15	24
RKO	colon	Primary tumor				ATCC	CRL-2577	MSI	13	CIMP+	undiff	CMS4	Yes	Yes	DMEM/F-12	10	12,25
SW1116	colon	Unknown	Male	73	Dukes’ A	ECACC	87071006	MSS	57	CIMP-	colon-like	CMS2	Yes	Yes	DMEM/F-12	15	26
SW1463	rectum	Unknown	Female	55	Dukes’ C	ATCC	CCL-234	MSS	27	CIMP-	colon-like	CMS2	Yes	No	DMEM/F-12	10	26
SW403	colon	Unknown	Female	51		ECACC	87071008	MSS	59	CIMP-	colon-like	CMS2	Yes	No	DMEM/F-12	10	26
SW48	colon	Unknown	Female	83	Dukes’ C	ATCC	CCL-231	MSI	10	CIMP+	undiff	CMS1	Yes	Yes	DMEM/F-12	10	26
SW480	descending colon	Primary tumor	Male	50	Dukes’ B	ECACC	87092801	MSS	38	CIMP-	undiff	CMS4	Yes	Yes	DMEM/F-12	15	26
SW620	descending colon	Lymph node metastasis	Male	51	Dukes’ C	ECACC	87051203	MSS	30	CIMP-	undiff	CMS4	No	Yes	DMEM/F-12	10	26
SW837	rectum	Unknown	Male	53		ATCC	CCL-235	MSS	30	CIMP+	undiff	CMS4	Yes	No	DMEM/F-12	10	26
SW948	colon	Unknown	Female	81	Dukes’ C	ECACC	91030714	MSS	69	CIMP-	colon-like	CMS3	Yes	Yes	DMEM/F-12	15	26
TC71	sigmoid colon	Primary tumor			Dukes’ B	INSERM	R. Hamelin, Paris	MSI	14	CIMP-	undiff	CMS4	Yes	Yes	DMEM/F-12	10	27
V9P	rectum	Primary tumor	Male	67	Dukes’ D	INSERM	R. Hamelin, Paris	MSS	31	CIMP-	colon-like	CMS2	Yes	Yes	DMEM/F-12	10	28
WiDr	colon	Unknown				ATCC	CCL-218	MSS	44	CIMP+	colon-like	CMS3	No	Yes	EMEM	10	2
* Selected cell lines were removed for statistical analyses due to being derived from the same patient as another cell line in the dataset.
† Medium also added antibiotics Streptomycin and Penicillin, along with amino acid L-glutamine.
Abreviations:
FBS: Fetal Bovine Serum (Gibco)
EMEM: Eagle's Minimal Essential Medium (ATCC)
DMEM/F-12: Dulbecco's Modified Eagle Medium: Nutrient Mixture F-12 (Gibco)
RPMI 1640: Roswell Park Memorial Institute 1640 (Gibco)
100 µl/ml streptomycin, 100 units/ml penicillin (Gibco)
2 mM L-glutamine (Sigma-Aldrich)
Relevant references
1: Caro et al, Characterisation of a newly isolated Caco-2 clone (TC-7), International Journal of Pharmaceutics, 1995
2: Fogh et al, Absence of HeLa cell contamination in 169 cell lines derived from human tumors, J Natl Cancer Inst, 1977
3: Farrell et al, Growing colorectal tumors: minimizing microbial and stromal competition and assessing in vitro selection pressures, Cytotechnology, 2000
4: Carell et al , Establishment of a cell line (Co-115) from a human colon carcinoma transplanted into nude mice, Cancer Research, 1976
5: Semple et al, Tumor and lymphoid cell lines from a patient with carcinoma of the colon for a cytotoxicity model, Cancer Research, 1978
6: Quinn et al , Cell lines from human colon carcinoma with unusual cell products, Cancer Research, 1979
7: Chen et al, DLD-1 and HCT-15 cell lines derived separately from colorectal carcinomas have totally different chromosome changes but the same genetic origin, Cancer Genet Cytogenet, 1995
8: Dexter et al, Heterogeneity of cancer cells from a single human colon carcinoma, Am J Med, 1981
9: Dexter et al, N,N-dimethylformamide-induced alteration of cell culture characteristics and loss of tumorigenicity in cultured human colon carcinoma cells, Cancer Research, 1979
10: Tibbetts et al, Chemotherapy of cell-line-derived human colon carcinomas in mice immunosuppressed with antithymocyte serum, Cancer, 1977
11: Vermeulen et al, Did the four human cancer cell lines DLD-1, HCT-15, HCT-8, and HRT-18 originate from one and the same patient?, Cancer Genet Cytogenet, 1998
12: Brattain et al , Initiation and characterization of cultures of human colonic carcinoma with different biological characteristics utilizing feeder layers of confluent fibroblasts, Oncodev Biol Med, 1981
13: Chantret et al, Epithelial polarity, Cancer Research, 1988
14: Alley et al , Feasibility of drug screening with panels of human tumor cell lines using a microculture tetrazolium assay, Cancer Research, 1988
15: Brattain et al , Heterogeneity of malignant cells from a human colonic carcinoma, Cancer Research, 1981
16: Eshleman et al, Increased mutation rate at the hprt locus accompanies microsatellite instability in colon cancer, Oncogene, 1995
17: Fogh et al, New Human Tumor Cell Lines, Book title: Human Tumor Cells in Vitro, 1975
18: Cajot et al, Differential display cloning identifies motility-related protein (MRP1/CD9) as highly expressed in primary compared to metastatic human colon carcinoma cells, Cancer Research, 1997
19: Morikawa et al, In vivo selection of highly metastatic cells from surgical specimens of different primary human colon carcinomas implanted into nude mice, , 1988
20: Camps et al, Genetic evolution in colon cancer KM12 cells and metastatic derivates, International Journal of Cancer, 2004
21: Drewinko et al, Establishment of a human carcinoembryonic antigen-producing colon adenocarcinoma cell line, Cancer Research, 1976
22: Suardet et al, Responsiveness of three newly established human colorectal cancer cell lines to transforming growth factors beta 1 and beta 2, Cancer Research, 1992
23: Tom et al, Human colonic adenocarcinoma cells. I. Establishment and description of a new line, In Vitro, 1976
24: Park et al, Characteristics of cell lines established from human colorectal carcinoma, Cancer Research, 1987
25: Brattain et al , Heterogeneity of human colon carcinoma, Cancer Metastasis Rev, 1984
26: Leibovitz et al, Classification of human colorectal adenocarcinoma cell lines, Cancer Research, 1976
27: Bras-Goncalves et al, Sensitivity to CPT-11 of xenografted human colorectal cancers as a function of microsatellite instability and p53 status, Br J Cancer, 2000
28: McBain et al, Establishment and characterization of human colorectal cancer cell lines, Cancer Research, 1984

## Sheet: Table_S2
Genes investigated by targeted sequencing (HGNC gene symbols, n=612 genes)
A	B	C	D	E	F	G	H	I	J	K	L	M	N	O	P	R	S	T	U	V	W	Y	Z
AAK1	BCKDK	C9orf96	DAPK1	EEF2K	FASTK	GAB1	HAUS3	ICK	JAK1	KALRN	LATS1	MAK	NEK1	OBSCN	PAK1	RAC1	SBK1	TAF1	UHMK1	VRK1	WEE1	YES1	ZAK
AATK	BLK	CABC1	DAPK2	EGFR	FBXW7	GAK	HCK	IDH1	JAK2	KDR	LATS2	MAP2K1	NEK10	OXSR1	PAK2	RAF1	SBK2	TAF1L	ULK1	VRK2	WEE2	YSK4	ZAP70
ABL1	BMP2K	CAMK1	DAPK3	EIF2AK1	FER	GATA3	HIPK1	IDH2	JAK3	KIAA1468	LCK	MAP2K2	NEK11		PAK3	RAGE	SCYL1	TAOK1	ULK2	VRK3	WNK1
ABL2	BMPR1A	CAMK1D	DCLK1	EIF2AK2	FES	GCK	HIPK2	IGF1R		KIAA1804	LIMK1	MAP2K3	NEK2		PAK4	RB1	SCYL2	TAOK2	ULK3		WNK2
ACTR2	BMPR1B	CAMK1G	DCLK2	EIF2AK3	FGFR1	GRK1	HIPK3	IKBKB		KIT	LIMK2	MAP2K4	NEK3		PAK6	RET	SCYL3	TAOK3	ULK4		WNK3
ACVR1	BMPR2	CAMK2A	DCLK3	EIF2AK4	FGFR2	GRK4	HIPK4	IKBKE		KLHL4	LMTK2	MAP2K5	NEK4		PAK7	RHEB	SGK1	TBCK	USP28		WNK4
ACVR1B	BMX	CAMK2B	DDR1	EPHA1	FGFR3	GRK5	HRAS	ILK		KRAS	LMTK3	MAP2K6	NEK5		PALB2	RIOK1	SGK196	TBK1
ACVR1C	BRAF	CAMK2D	DDR2	EPHA10	FGFR4	GRK6	HSPB8	INPP4A		KSR1	LRRK1	MAP2K7	NEK6		PASK	RIOK2	SGK2	TEC
ACVR2A	BRCA1	CAMK2G	DGKA	EPHA2	FGR	GRK7	HUNK	INSR		KSR2	LRRK2	MAP3K1	NEK7		PBK	RIOK3	SGK269	TEK
ACVR2B	BRCA2	CAMK4	DGKB	EPHA3	FLJ25006	GSG2		INSRR			LTK	MAP3K10	NEK8		PCTK1	RIPK1	SGK3	TERT
ACVRL1	BRD2	CAMKK1	DGKD	EPHA4	FLT1	GSK3A		IP6K1			LYN	MAP3K11	NEK9		PCTK2	RIPK2	SGK493	TESK1
ADCK1	BRD3	CAMKK2	DGKE	EPHA5	FLT3	GSK3B		IP6K2				MAP3K12	NF1		PCTK3	RIPK3	SIK1	TESK2
ADCK4	BRD4	CAMKV	DGKG	EPHA6	FLT4	GUCY2C		IP6K3				MAP3K13	NF2		PDGFRA	RIPK4	SIK2	TEX14
ADCK5	BRDT	CASK	DGKH	EPHA7	FRK	GUCY2D		IPMK				MAP3K14	NFKB1		PDGFRB	RNASEL	SIK3	TGFBR1
ADRBK1	BRSK1	CCND1	DGKI	EPHA8	FYN	GUCY2F		IPPK				MAP3K15	NFKBIA		PDIK1L	RNF220	SLK	TGFBR2
ADRBK2	BRSK2	CCND2	DGKQ	EPHB1				IRAK1				MAP3K2	NFKBIE		PDK1	ROCK1	SMG1	TIE1
AGK	BTK	CCND3	DGKZ	EPHB2				IRAK2				MAP3K3	NLK		PDK2	ROCK2	SNRK	TLK1
AKT1	BUB1	CCRK	DMPK	EPHB3				IRAK3				MAP3K4	NPR1		PDK3	ROR1	SNX4	TLK2
AKT2	BUB1B	CDC2	DSTYK	EPHB4				IRAK4				MAP3K5	NPR2		PDK4	ROR2	SP1	TNIK
AKT3		CDC2L2	DYRK1A	EPHB6				IRS2				MAP3K6	NRAS		PDPK1	ROS1	SPEG	TNK1
ALK		CDC2L5	DYRK1B	ERBB2				IRS4				MAP3K7	NRBP1		PFTK1	RPS6KA1	SPHK1	TNK2
ALPK1		CDC2L6	DYRK2	ERBB3				ITK				MAP3K8	NRBP2		PFTK2	RPS6KA2	SPHK2	TNNI3K
ALPK2		CDC42BPA	DYRK3	ERBB4				ITPK1				MAP3K9	NRK		PHKG1	RPS6KA3	SRC	TP53
ALPK3		CDC42BPB	DYRK4	ERN1				ITPKA				MAP4K1	NTRK1		PHKG2	RPS6KA4	SRM	TP53RK
AMHR2		CDC42BPG		ERN2				ITPKB				MAP4K2	NTRK2		PI4K2A	RPS6KA5	SRMS	TRIB1
ANKK1		CDC6		ESR1				ITPKC				MAP4K3	NTRK3		PI4K2B	RPS6KA6	SRPK1	TRIB2
APC		CDC7		ESR2								MAP4K4	NUAK1		PI4KA	RPS6KB1	SRPK2	TRIB3
ARAF		CDH1										MAP4K5	NUAK2		PI4KB	RPS6KB2	SRPK3	TRIM24
ATM		CDK10										MAPK1			PIK3C2A	RPS6KC1	STK10	TRIM28
ATR		CDK2										MAPK10			PIK3C2B	RPS6KL1	STK11	TRIM33
AURKA		CDK3										MAPK11			PIK3C2G	RYK	STK16	TRIO
AURKB		CDK4										MAPK12			PIK3C3		STK17A	TRPM6
AURKC		CDK5										MAPK13			PIK3CA		STK17B	TRPM7
AXL		CDK6										MAPK14			PIK3CB		STK19	TRRAP
		CDK7										MAPK15			PIK3CD		STK24	TSSK1B
		CDK8										MAPK3			PIK3CG		STK25	TSSK2
		CDK9										MAPK4			PIK3R1		STK3	TSSK3
		CDKL1										MAPK6			PIK3R2		STK31	TSSK4
		CDKL2										MAPK7			PIK3R3		STK32A	TSSK6
		CDKL3										MAPK8			PIK3R4		STK32B	TTBK1
		CDKL4										MAPK9			PIK3R5		STK32C	TTBK2
		CDKL5										MAPKAPK2			PIK3R6		STK33	TTK
		CDKN2A										MAPKAPK3			PIKFYVE		STK35	TTN
		CDKN2B										MAPKAPK5			PIM1		STK36	TXK
		CERK										MARK1			PIM2		STK38	TYK2
		CHD3										MARK2			PIM3		STK38L	TYRO3
		CHEK1										MARK3			PINK1		STK39
		CHEK2										MARK4			PIP4K2A		STK4
		CHUK										MAST1			PIP4K2B		STK40
		CIT										MAST2			PIP4K2C		STRADA
		CLK1										MAST3			PIP5K1A		STRADB
		CLK2										MAST4			PIP5K1B		STYK1
		CLK3										MASTL			PIP5K1C		SYK
		CLK4										MATK			PIP5KL1
		CNKSR2										MELK			PIPSL
		COL1A1										MERTK			PKLR
		CRKRS										MET			PKMYT1
		CSF1R										MGC42105			PKN1
		CSK										MINK1			PKN2
		CSNK1A1										MKNK1			PKN3
		CSNK1A1L										MKNK2			PLK1
		CSNK1D										MLH1			PLK2
		CSNK1E										MLKL			PLK3
		CSNK1G1										MOS			PLK4
		CSNK1G2										MST1R			PNCK
		CSNK1G3										MST4			PRAGMIN
		CSNK2A1										MTOR			PRKAA1
		CSNK2A2										MUSK			PRKAA2
		CTNNB1										MYC			PRKACA
												MYLK			PRKACB
												MYLK2			PRKACG
												MYLK3			PRKCA
												MYLK4			PRKCB
												MYO3A			PRKCD
												MYO3B			PRKCE
															PRKCG
															PRKCH
															PRKCI
															PRKCQ
															PRKCZ
															PRKD1
															PRKD2
															PRKD3
															PRKDC
															PRKG1
															PRKG2
															PRKX
															PRKY
															PRPF4B
															PSKH1
															PSKH2
															PTEN
															PTK2
															PTK2B
															PTK6
															PTK7
															PXK

## Sheet: Table_S3
70 CMS and CRC relevant gene sets
geneset	reference	source	pmid	url	Number of genes	colon.like-undiff	PValue	FDR corrected Pvalue
Gastro-Intestinal markers	Uhlen 2015	proteinatlas.org (accessed 20160427)	25613900	http://www.proteinatlas.org/humanproteome/gastrointestinal+tract	611	Up	1.54083e-16	1.07858e-14
Downregulated in CRC stem-like	de Sousa e Melo 2011	SuppTable1A	22056143	https://doi.org/10.1016/j.stem.2011.10.008	44	Up	7.39077e-10	2.58677e-08
CRC MSS markers (genes upregulated in CRC MSS compared to CRC MSI)	Liberzon 2011	MSigDB C2 database (v5.2)	21546393	http://software.broadinstitute.org/gsea/msigdb/collections.jsp	74	Up	8e-09	1.85622e-07
Targets repressed by HNF1A	Liberzon 2011	MSigDB C2 database (v5.2)	21546393	http://software.broadinstitute.org/gsea/msigdb/collections.jsp	104	Up	1.1e-08	1.91718e-07
Targets upregulated by HNF4A	Liberzon 2011	MSigDB C2 database (v5.2)	21546393	http://software.broadinstitute.org/gsea/msigdb/collections.jsp	57	Up	2.06969e-08	2.89757e-07
Oxidative Phosphorylation	Liberzon 2011	MSigDB Hallmark database (v5.2)	21546393	http://software.broadinstitute.org/gsea/msigdb/collections.jsp	197	Up	1.43792e-07	1.67757e-06
Targets repressed by WNT signaling	Vermeulen 2010	SuppTable1	20418870	https://doi.org/10.1038/ncb2048	7	Up	3.41821e-07	3.41821e-06
Peroxisome	Liberzon 2011	MSigDB Hallmark database (v5.2)	21546393	http://software.broadinstitute.org/gsea/msigdb/collections.jsp	104	Up	4.28108e-05	0.000374595
Targets upregulated by CDX2	Liberzon 2011	MSigDB C2 database (v5.2)	21546393	http://software.broadinstitute.org/gsea/msigdb/collections.jsp	36	Up	8.00581e-05	0.000598321
Adipogenesis	Liberzon 2011	MSigDB Hallmark database (v5.2)	21546393	http://software.broadinstitute.org/gsea/msigdb/collections.jsp	196	Up	8.54745e-05	0.000598321
Crypt:Late transit amplifying	Merlos-Suarez 2011	SuppTable5	21419747	https://doi.org/10.1016/j.stem.2011.02.020	50	Up	0.000205072	0.001305
Cholesterol Homeostasis	Liberzon 2011	MSigDB Hallmark database (v5.2)	21546393	http://software.broadinstitute.org/gsea/msigdb/collections.jsp	74	Up	0.000308377	0.00179886
Epithelial Mesenchymal Transition	Liberzon 2011	MSigDB Hallmark database (v5.2)	21546393	http://software.broadinstitute.org/gsea/msigdb/collections.jsp	199	Down	0.000445774	0.0023359
Targets upregulated by TGFB	Fessler 2016	GSE79461	27221051	https://www.ncbi.nlm.nih.gov/pmc/articles/PMC4931289/	59	Down	0.00046718	0.0023359
Targets downregulated by TGFB	Fessler 2016	GSE79461	27221051	https://www.ncbi.nlm.nih.gov/pmc/articles/PMC4931289/	39	Up	0.000565684	0.00263986
Glycerophospholipid biosynthesis:reactome	Croft 2014	reactome database (accessed 20161212)	24243840	http://www.reactome.org/pages/download-data/	122	Up	0.00764545	0.0325028
MTORC1 Signaling	Liberzon 2011	MSigDB Hallmark database (v5.2)	21546393	http://software.broadinstitute.org/gsea/msigdb/collections.jsp	199	Up	0.00789354	0.0325028
MYC Targets	Liberzon 2011	MSigDB Hallmark database (v5.2)	21546393	http://software.broadinstitute.org/gsea/msigdb/collections.jsp	57	Up	0.0238651	0.0893905
Crypt:Proliferation	Merlos-Suarez 2011	SuppTable5	21419747	https://doi.org/10.1016/j.stem.2011.02.020	176	Down	0.0242631	0.0893905
Angiogenesis	Liberzon 2011	MSigDB Hallmark database (v5.2)	21546393	http://software.broadinstitute.org/gsea/msigdb/collections.jsp	36	Down	0.0302929	0.106025
Interferon Alpha Response	Liberzon 2011	MSigDB Hallmark database (v5.2)	21546393	http://software.broadinstitute.org/gsea/msigdb/collections.jsp	96	Up	0.033496	0.111653
Estrogen Response Late	Liberzon 2011	MSigDB Hallmark database (v5.2)	21546393	http://software.broadinstitute.org/gsea/msigdb/collections.jsp	198	Up	0.0407363	0.128003
Extracellular Matrix mCRC	Naba 2014	Additional Data 2	25037231	https://www.ncbi.nlm.nih.gov/pmc/articles/PMC4223627/	64	Down	0.042058	0.128003
Myogenesis	Liberzon 2011	MSigDB Hallmark database (v5.2)	21546393	http://software.broadinstitute.org/gsea/msigdb/collections.jsp	197	Down	0.0454425	0.13104
PI3K AKT MTOR Signaling	Liberzon 2011	MSigDB Hallmark database (v5.2)	21546393	http://software.broadinstitute.org/gsea/msigdb/collections.jsp	103	Up	0.0468001	0.13104
HNF1A up	Liberzon 2011	MSigDB C2 database (v5.2)	21546393	http://software.broadinstitute.org/gsea/msigdb/collections.jsp	159	Down	0.0497575	0.133963
Estrogen Response Early	Liberzon 2011	MSigDB Hallmark database (v5.2)	21546393	http://software.broadinstitute.org/gsea/msigdb/collections.jsp	198	Up	0.0864184	0.224048
Crypt:EPHB2-ISC	Merlos-Suarez 2011	SuppTable5	21419747	https://doi.org/10.1016/j.stem.2011.02.020	28	Down	0.0966439	0.24161
Protein Secretion	Liberzon 2011	MSigDB Hallmark database (v5.2)	21546393	http://software.broadinstitute.org/gsea/msigdb/collections.jsp	95	Up	0.102422	0.247225
Interferon Gamma Response	Liberzon 2011	MSigDB Hallmark database (v5.2)	21546393	http://software.broadinstitute.org/gsea/msigdb/collections.jsp	198	Up	0.115202	0.268804
Stromal estimate	Yoshihara 2013	estimate (R-package v1.0.11, code:data(SI_geneset))	24113773	http://bioinformatics.mdanderson.org/estimate/	136	Down	0.126311	0.285219
Crypt:LGR5-ISC	Merlos-Suarez 2011	SuppTable5	21419747	https://doi.org/10.1016/j.stem.2011.02.020	61	Down	0.142938	0.312677
G2M Checkpoint	Liberzon 2011	MSigDB Hallmark database (v5.2)	21546393	http://software.broadinstitute.org/gsea/msigdb/collections.jsp	195	Down	0.173525	0.357751
Retionic acid induced	Duffy 2017	SuppTable2	28187790	https://www.ncbi.nlm.nih.gov/pmc/articles/PMC5303304/	80	Down	0.173765	0.357751
Androgen Response	Liberzon 2011	MSigDB Hallmark database (v5.2)	21546393	http://software.broadinstitute.org/gsea/msigdb/collections.jsp	99	Up	0.184647	0.361502
DNA Repair	Liberzon 2011	MSigDB Hallmark database (v5.2)	21546393	http://software.broadinstitute.org/gsea/msigdb/collections.jsp	148	Up	0.185915	0.361502
Glucose transport:react	Croft 2014	reactome database (accessed 20161212)	24243840	http://www.reactome.org/pages/download-data/	44	Down	0.20067	0.379646
MYB down	Thorner 2010	SuppTable2	20949095	https://www.ncbi.nlm.nih.gov/pmc/articles/PMC2951337/	86	Down	0.208022	0.383198
Glycolysis	Liberzon 2011	MSigDB Hallmark database (v5.2)	21546393	http://software.broadinstitute.org/gsea/msigdb/collections.jsp	199	Up	0.238269	0.427662
E2F Targets	Liberzon 2011	MSigDB Hallmark database (v5.2)	21546393	http://software.broadinstitute.org/gsea/msigdb/collections.jsp	196	Down	0.264643	0.463125
Notch Signaling	Liberzon 2011	MSigDB Hallmark database (v5.2)	21546393	http://software.broadinstitute.org/gsea/msigdb/collections.jsp	31	Up	0.29137	0.488163
UV Response down	Liberzon 2011	MSigDB Hallmark database (v5.2)	21546393	http://software.broadinstitute.org/gsea/msigdb/collections.jsp	140	Down	0.292898	0.488163
Mitotic Spindle	Liberzon 2011	MSigDB Hallmark database (v5.2)	21546393	http://software.broadinstitute.org/gsea/msigdb/collections.jsp	198	Down	0.364923	0.577983
WNT induced	Vermeulen 2010	SuppTable1	20418870	https://doi.org/10.1038/ncb2048	13	Up	0.371109	0.577983
P53 Pathway	Liberzon 2011	MSigDB Hallmark database (v5.2)	21546393	http://software.broadinstitute.org/gsea/msigdb/collections.jsp	194	Up	0.375521	0.577983
Apical Junction	Liberzon 2011	MSigDB Hallmark database (v5.2)	21546393	http://software.broadinstitute.org/gsea/msigdb/collections.jsp	196	Down	0.379817	0.577983
UV Response up	Liberzon 2011	MSigDB Hallmark database (v5.2)	21546393	http://software.broadinstitute.org/gsea/msigdb/collections.jsp	155	Up	0.403761	0.601346
CRC stem up	de Sousa e Melo 2011	SuppTable1A	22056143	https://doi.org/10.1016/j.stem.2011.10.008	124	Down	0.428874	0.625441
HNF4A down	Liberzon 2011	MSigDB C2 database (v5.2)	21546393	http://software.broadinstitute.org/gsea/msigdb/collections.jsp	7	Down	0.452841	0.646916
Hypoxia	Liberzon 2011	MSigDB Hallmark database (v5.2)	21546393	http://software.broadinstitute.org/gsea/msigdb/collections.jsp	196	Down	0.463649	0.649108
IL6 JAK STAT3 Signaling	Liberzon 2011	MSigDB Hallmark database (v5.2)	21546393	http://software.broadinstitute.org/gsea/msigdb/collections.jsp	87	Up	0.492705	0.676262
Retinoid metabolism and transport:react	Croft 2014	reactome database (accessed 20161212)	24243840	http://www.reactome.org/pages/download-data/	42	Up	0.561571	0.753079
TNFA Signaling Via NFkB	Liberzon 2011	MSigDB Hallmark database (v5.2)	21546393	http://software.broadinstitute.org/gsea/msigdb/collections.jsp	198	Down	0.570188	0.753079
Unfolded Protein Response	Liberzon 2011	MSigDB Hallmark database (v5.2)	21546393	http://software.broadinstitute.org/gsea/msigdb/collections.jsp	111	Up	0.64005	0.827989
Glucose metabolism:react	Croft 2014	reactome database (accessed 20161212)	24243840	http://www.reactome.org/pages/download-data/	77	Down	0.650562	0.827989
CRC MSI-MSS up (= CRC MSS down)	Liberzon 2011	MSigDB C2 database (v5.2)	21546393	http://software.broadinstitute.org/gsea/msigdb/collections.jsp	27	Up	0.673724	0.842155
Reactive Oxigen Species Pathway	Liberzon 2011	MSigDB Hallmark database (v5.2)	21546393	http://software.broadinstitute.org/gsea/msigdb/collections.jsp	46	Up	0.70485	0.853698
KRAS Signaling down	Liberzon 2011	MSigDB Hallmark database (v5.2)	21546393	http://software.broadinstitute.org/gsea/msigdb/collections.jsp	196	Down	0.721259	0.853698
CDX2 down	Liberzon 2011	MSigDB C2 database (v5.2)	21546393	http://software.broadinstitute.org/gsea/msigdb/collections.jsp	8	Up	0.730142	0.853698
Inflammatory Response	Liberzon 2011	MSigDB Hallmark database (v5.2)	21546393	http://software.broadinstitute.org/gsea/msigdb/collections.jsp	198	Down	0.731741	0.853698
KRAS Signaling up	Liberzon 2011	MSigDB Hallmark database (v5.2)	21546393	http://software.broadinstitute.org/gsea/msigdb/collections.jsp	194	Up	0.75641	0.868011
Apoptosis	Liberzon 2011	MSigDB Hallmark database (v5.2)	21546393	http://software.broadinstitute.org/gsea/msigdb/collections.jsp	159	Down	0.778487	0.878937
Hedgehog Signaling	Liberzon 2011	MSigDB Hallmark database (v5.2)	21546393	http://software.broadinstitute.org/gsea/msigdb/collections.jsp	35	Down	0.831663	0.892008
Retionic acid repressed	Duffy 2017	SuppTable2	28187790	https://www.ncbi.nlm.nih.gov/pmc/articles/PMC5303304/	45	Up	0.839273	0.892008
WNT Beta-catenin Signaling	Watanabe 2015	SuppTable1	24651522	http://www.ncbi.nlm.nih.gov/pmc/articles/PMC3961325/	42	Up	0.851367	0.892008
Glycerophospholipid catabolism:react	Croft 2014	reactome database (accessed 20161212)	24243840	http://www.reactome.org/pages/download-data/	7	Down	0.857995	0.892008
Complement	Liberzon 2011	MSigDB Hallmark database (v5.2)	21546393	http://software.broadinstitute.org/gsea/msigdb/collections.jsp	196	Up	0.859466	0.892008
IL2 STAT5 Signaling	Liberzon 2011	MSigDB Hallmark database (v5.2)	21546393	http://software.broadinstitute.org/gsea/msigdb/collections.jsp	197	Up	0.866522	0.892008
Apical Surface	Liberzon 2011	MSigDB Hallmark database (v5.2)	21546393	http://software.broadinstitute.org/gsea/msigdb/collections.jsp	44	Down	0.895065	0.908037
CTNNB1 induced	Watanabe 2015	SuppTable1	24651522	https://www.ncbi.nlm.nih.gov/pmc/articles/PMC3961325/	151	Up	0.989008	0.989008

## Sheet: Table_S4
Reverse Phase Protein lysate Array (RPPA): proteins assessed
protein	Gene Name	antibody	modification	rppa.id	entrez	isPhosphorylated	validation	antibody.id	antibody.name	antibody.official	Antibody Origin
YWHAB|14-3-3-beta	YWHAB	14-3-3-beta		882	7529	FALSE	Valid	Santa Cruz.sc-628	14-3-3-beta	14-3-3 beta	Rabbit
YWHAE|14-3-3-epsilon	YWHAE	14-3-3-epsilon		913	7531	FALSE	Use with Caution	Santa Cruz.sc-23957	14-3-3-epsilon	14-3-3 epsilon	Mouse
YWHAZ|14-3-3-zeta	YWHAZ	14-3-3-zeta		883	7534	FALSE	Valid	Santa Cruz.sc-1019	14-3-3-zeta	14-3-3 zeta	Rabbit
EIF4EBP1|4E-BP1	EIF4EBP1	4E-BP1		2	1978	FALSE	Valid	CST.9452	4E-BP1	4E-BP1	Rabbit
EIF4EBP1|4E-BP1_pS65	EIF4EBP1	4E-BP1_pS65	pS65	3	1978	TRUE	Valid	CST.9456	4E-BP1_pS65	4E-BP1 (phospho S65)	Rabbit
EIF4EBP1|4E-BP1_pT37_T46	EIF4EBP1	4E-BP1_pT37_T46	pT37_T46	6	1978	TRUE	Valid	CST.9459	4E-BP1_pT37_T46	4E-BP1 (phospho T37/T46)	Rabbit
TP53BP1|53BP1	TP53BP1	53BP1		985	7158	FALSE	Valid	CST.4937	53BP1	53BP1	Rabbit
ACACA/ACACB|ACC_pS79	ACACA	ACC_pS79	pS79	13	NA	TRUE	Valid	CST.3661	ACC_pS79	Acetyl CoA Carboxylase (phospho S79)	Rabbit
ACACA|ACC1	ACACA	ACC1		14	31	FALSE	Use with Caution	Abcam.ab45174	ACC1	Acetyl CoA Carboxylase 1	Rabbit
ACVRL1|ACVRL1	ACVRL1	ACVRL1		1086	94	FALSE	Use with Caution	Abcam.ab108207	ACVRL1	ACVRL1	Rabbit
ADAR|ADAR1	ADAR	ADAR1		1198	103	FALSE	Valid	Abcam.ab88574	ADAR1	ADAR1	Mouse
AKT1/AKT2/AKT3|Akt	AKT1	Akt		1084	NA	FALSE	Valid	CST.4691	Akt	Akt	Rabbit
AKT1/AKT2/AKT3|Akt_pS473	AKT1	Akt_pS473	pS473	230	NA	TRUE	Valid	CST.9271	Akt_pS473	Akt (phospho S473)	Rabbit
AKT1/AKT2/AKT3|Akt_pT308	AKT1	Akt_pT308	pT308	1154	NA	TRUE	Valid	CST.2965	Akt_pT308	Akt (phospho T308)	Rabbit
PRKAA1|AMPKa	PRKAA1	AMPKa		39	5562	FALSE	Use with Caution	CST.2532	AMPKa	AMPK alpha	Rabbit
PRKAA1|AMPKa_pT172	PRKAA1	AMPKa_pT172	pT172	40	5562	TRUE	Use with Caution	CST.2535	AMPKa_pT172	AMPK alpha (phospho T172)	Rabbit
ANXA1|Annexin-I	ANXA1	Annexin-I		1208	301	FALSE	Valid	BD Biosciences.610066	Annexin-I	Annexin I	Mouse
ANXA7|Annexin-VII	ANXA7	Annexin-VII		1142	310	FALSE	Valid	BD Biosciences.610668	Annexin-VII	Annexin VII	Mouse
AR|AR	AR	AR		756	367	FALSE	Valid	Abcam.ab52615	AR	Androgen Receptor	Rabbit
ARAF|A-Raf	ARAF	A-Raf		1217	369	FALSE	Valid	CST.4432	A-Raf	A-Raf	Rabbit
DIRAS3|ARHI	DIRAS3	ARHI		1273	9077	FALSE	Use with Caution	MDACC Laboratory.Bast Lab	ARHI	ARHI	Mouse
ARID1A|ARID1A	ARID1A	ARID1A		1442	8289	FALSE	Use with Caution	Sigma-Aldrich.HPA005456	ARID1A	ARID1A	Rabbit
ATG3|Atg3	ATG3	Atg3		1612	64422	FALSE	Valid	CST.3415	Atg3	Atg3	Rabbit
ATG7|Atg7	ATG7	Atg7		1613	10533	FALSE	Valid	CST.8558	Atg7	Atg7	Rabbit
ATM|ATM	ATM	ATM		1363	472	FALSE	Valid	CST.2873	ATM	ATM	Rabbit
ATM|ATM_pS1981	ATM	ATM_pS1981	pS1981	1364	472	TRUE	Valid	CST.5883	ATM_pS1981	ATM (phospho S1981)	Rabbit
ATP5A|ATP5A	ATP5A	ATP5A		1289	NA	FALSE	Use with Caution	Abcam.ab14748	ATP5A	ATP5A	Mouse
ATR|ATR_pS428	ATR	ATR_pS428	pS428	1795	545	TRUE	Use with Caution	Abcam.ab178407	ATR_pS428	ATR (Phospho S428)	Rabbit
AIM1|Aurora-B	AIM1	Aurora-B		1404	202	FALSE	Valid	CST.3094	Aurora-B	Aurora B/AIM1	Rabbit
AXL|Axl	AXL	Axl		1271	558	FALSE	Valid	CST.8661	Axl	Axl	Rabbit
CD276|B7-H3	CD276	B7-H3		1725	80381	FALSE	Use with Caution	CST.14058	B7-H3	B7-H3	Rabbit
VTCN1|B7-H4	VTCN1	B7-H4		1726	79679	FALSE	Use with Caution	CST.14572	B7-H4	B7-H4	Rabbit
ACTB|b-Actin	ACTB	b-Actin		1169	60	FALSE	Use with Caution	CST.4970	b-Actin	beta Actin	Rabbit
BAD|Bad_pS112	BAD	Bad_pS112	pS112	63	572	TRUE	Valid	CST.9291	Bad_pS112	Bad (phospho S112)	Rabbit
BAK1|Bak	BAK1	Bak		71	578	FALSE	Use with Caution	Abcam.ab32371	Bak	Bak	Rabbit
BAP1|BAP1	BAP1	BAP1		1207	8314	FALSE	Valid	Santa Cruz.sc-28383	BAP1	BAP1	Mouse
BAX|Bax	BAX	Bax		73	581	FALSE	Valid	CST.2772	Bax	Bax	Rabbit
CTNNB1|b-Catenin	CTNNB1	b-Catenin		75	1499	FALSE	Valid	CST.9562	b-Catenin	beta Catenin	Rabbit
CTNNB1|b-Catenin_pT41_S45	CTNNB1	b-Catenin_pT41_S45	pT41_S45	1170	1499	TRUE	Valid	CST.9565	b-Catenin_pT41_S45	beta Catenin (phospho T41/S45)	Rabbit
BCL2|Bcl2	BCL2	Bcl2		80	596	FALSE	Valid	Dako.M0887	Bcl2	Bcl2	Mouse
BCL2A1|Bcl2A1	BCL2A1	Bcl2A1		1299	597	FALSE	Valid	Abnova.PAB8528	Bcl2A1	Bcl2A1	Rabbit
BCL2L1|Bcl-xL	BCL2L1	Bcl-xL		85	598	FALSE	Valid	CST.2762	Bcl-xL	Bcl-xL	Rabbit
BECN1|Beclin	BECN1	Beclin		87	8678	FALSE	Use with Caution	Santa Cruz.sc-10086	Beclin	Beclin	Goat
BID|Bid	BID	Bid		88	637	FALSE	Use with Caution	Abcam.ab32060	Bid	Bid	Rabbit
BCL2L11|Bim	BCL2L11	Bim		90	10018	FALSE	Valid	Abcam.ab32158	Bim	Bim	Rabbit
BRAF|B-Raf	BRAF	B-Raf		92	673	FALSE	Valid	Abcam.ab33899	B-Raf	B-Raf	Rabbit
BRAF|B-Raf_pS445	BRAF	B-Raf_pS445	pS445	94	673	TRUE	Valid	CST.2696	B-Raf_pS445	B-Raf (phospho S445)	Rabbit
BRD4|BRD4	BRD4	BRD4		1567	23476	FALSE	Valid	CST.13440	BRD4	BRD4	Rabbit
ABL|c-Abl	ABL1	c-Abl		1565	NA	FALSE	Valid	CST.2862	c-Abl	c-Abl	Rabbit
CASP3|Caspase-3	CASP3	Caspase-3		108	836	FALSE	Use with Caution	Abcam.ab32042	Caspase-3	Caspase-3 active	Rabbit
CASP7|Caspase-7-cleaved	CASP7	Caspase-7-cleaved	cleaved	109	840	FALSE	Use with Caution	CST.9491	Caspase-7-cleaved	Caspase-7 (cleaved D198)	Rabbit
CASP8|Caspase-8-M-Q	CASP8	Caspase-8-M-Q		#N/A	841	FALSE	**Used for QC**	CST.9746	Caspase-8-M-Q	Caspase-8	Mouse
CAV1|Caveolin-1	CAV1	Caveolin-1		114	857	FALSE	Valid	CST.3238	Caveolin-1	Caveolin-1	Rabbit
L1CAM|CD171	L1CAM	CD171		1737	3897	FALSE	Valid	BioLegend.826701	CD171	CD171 (L1)	Mouse
CD26|CD26	DPP4	CD26		1308	NA	FALSE	Valid	Abcam.ab28340	CD26	CD26	Rabbit
ITGB1|CD29	CD29	CD29		1206	3688	FALSE	Valid	BD Biosciences.610467	CD29	CD29	Mouse
PECAM1|CD31	PECAM1	CD31		127	5175	FALSE	Valid	Dako.M0823	CD31	CD31	Mouse
CD44|CD44	CD44	CD44		1398	960	FALSE	Use with Caution	CST.3570	CD44	CD44	Mouse
ITGA2|CD49b	ITGA2	CD49b		937	3673	FALSE	Valid	BD Biosciences.611016	CD49b	CD49b	Mouse
CDC25C|cdc25C	CDC25C	cdc25C		1873	995	FALSE	Valid	CST.4688	cdc25C	cdc25C	Rabbit
CDK1|CDK1	CDK1	CDK1		1658	983	FALSE	Use with Caution	Abcam.ab32384	CDK1	CDK1	Rabbit
CHEK1|Chk1	CHEK1	Chk1		1203	1111	FALSE	Use with Caution	CST.2360	Chk1	Chk1	Mouse
CHEK1|Chk1_pS296	CHEK1	Chk1_pS296	pS296	1348	1111	TRUE	Valid	Abcam.ab79758	Chk1_pS296	Chk1 (phospho S296)	Rabbit
CHEK1|Chk1_pS345	CHEK1	Chk1_pS345	pS345	903	1111	TRUE	Use with Caution	CST.2348	Chk1_pS345	Chk1 (phospho S345)	Rabbit
CHEK2|Chk2	CHEK2	Chk2		146	11200	FALSE	Valid	CST.3440	Chk2	Chk2	Mouse
CHEK2|Chk2_pT68	CHEK2	Chk2_pT68	pT68	147	11200	TRUE	Use with Caution	CST.2197	Chk2_pT68	Chk2 (phospho T68)	Rabbit
JUN|c-Jun_pS73	JUN	c-Jun_pS73	pS73	155	3725	TRUE	Valid	CST.9164	c-Jun_pS73	c-Jun ( phospho S73)	Rabbit
KIT|c-Kit	KIT	c-Kit		157	3815	FALSE	Valid	Abcam.ab32363	c-Kit	c-Kit	Rabbit
CLDN7|Claudin-7	CLDN7	Claudin-7		852	1366	FALSE	Valid	Novus Biologicals.NB100-91714	Claudin-7	Claudin 7	Rabbit
MET|c-Met_pY1234_Y1235	MET	c-Met_pY1234_Y1235	pY1234_Y1235	727	4233	TRUE	Valid	CST.3129	c-Met_pY1234_Y1235	c-Met (phospho Y1234/Y1235)	Rabbit
MET|c-Met-M-Q	MET	c-Met-M-Q		#N/A	4233	FALSE	**Used for QC**	CST.3127	c-Met-M-Q	c-Met	Mouse
MYC|c-Myc	MYC	c-Myc		1143	4609	FALSE	Use with Caution	Santa Cruz.sc-764	c-Myc	c-Myc	Rabbit
COG3|COG3	COG3	COG3		1656	83548	FALSE	Valid	ProteinTech.11130-1-AP	COG3	COG3	Rabbit
COL6A1|Collagen-VI	COL6A1	Collagen-VI		171	1291	FALSE	Valid	Santa Cruz.sc-20649	Collagen-VI	COL6A1	Rabbit
SDHB|Complex-II-Subunit	SDHB	Complex-II-Subunit		1069	6390	FALSE	Valid	Invitrogen.459230	Complex-II-Subunit	Complex II Subunit	Mouse
GJA1|Connexin-43	CNST43	Connexin-43		1568	2697	FALSE	Use with Caution	CST.3512	Connexin-43	Connexin 43	Rabbit
NR2F2|Coup-TFII	NR2F2	Coup-TFII		1571	7026	FALSE	Use with Caution	CST.6434	Coup-TFII	Coup-TFII	Rabbit
PTGS2|Cox2	CMC2	Cox2		1218	5743	FALSE	Use with Caution	CST.4842	Cox2	Cox2	Rabbit
COX4I1|Cox-IV	PTGS3	Cox-IV		1253	1327	FALSE	Use with Caution	Abcam.ab14744	Cox-IV	Cox IV	Mouse
RAF1|C-Raf	RAF1	C-Raf		1201	5894	FALSE	Use with Caution	Millipore.04-739	C-Raf	C-Raf/Raf-1	Rabbit
RAF1|C-Raf_pS338	RAF1	C-Raf_pS338	pS338	179	5894	TRUE	Valid	CST.9427	C-Raf_pS338	C-Raf (phospho S338)	Rabbit
CXCR4|CXCR4	CXCR4	CXCR4		1307	7852	FALSE	Use with Caution	Abcam.ab2074	CXCR4	CXCR4	Rabbit
CCNB1|Cyclin-B1	CCNB1	Cyclin-B1		192	891	FALSE	Valid	Epitomics.1495-1	Cyclin-B1	Cyclin B1	Rabbit
CCND1|Cyclin-D1	CCND1	Cyclin-D1		194	595	FALSE	Valid	Santa Cruz.sc-718	Cyclin-D1	Cyclin D1	Rabbit
CCNE1|Cyclin-E1	CCNE1	Cyclin-E1		201	898	FALSE	Valid	Santa Cruz.sc-247	Cyclin-E1	Cyclin E1	Mouse
PPIF|Cyclophilin-F	PPIF	Cyclophilin-F		1257	10105	FALSE	Valid	Abcam.ab110324	Cyclophilin-F	Cyclophilin F	Mouse
TUBA1A|D-a-Tubulin	TUBA1A	D-a-Tubulin		1379	7846	FALSE	Valid	Abcam.ab48389	D-a-Tubulin	Detyrosinated alpha-Tubulin	Rabbit
PARK7|DJ1	PARK7	DJ1		891	11315	FALSE	Valid	Abcam.ab76008	DJ1	PARK7/DJ1	Rabbit
HISTH3|DM-Histone-H3	HISTH3	DM-Histone-H3	dimethyl	1380	NA	FALSE	Valid	Millipore.07-030	DM-Histone-H3	Dimethyl-Histone H3 (Lys4)	Rabbit
H3K9ME2|DM-K9-Histone-H3	H3K9ME2	DM-K9-Histone-H3	dimethyl	1397	NA	FALSE	Use with Caution	Abcam.ab32521	DM-K9-Histone-H3	Dimethyl-K9 Histone H3	Rabbit
DUSP4|DUSP4	DUSP4	DUSP4		1406	1846	FALSE	Valid	CST.5149	DUSP4	DUSP4/MKP2	Rabbit
DVL3|Dvl3	DVL3	Dvl3		940	1857	FALSE	Valid	CST.3218	Dvl3	Dvl3	Rabbit
E2F1|E2F1	E2F1	E2F1		1261	1869	FALSE	Valid	Santa Cruz.sc-251	E2F1	E2F-1	Mouse
CDH1|E-Cadherin	CDH1	E-Cadherin		1099	999	FALSE	Valid	CST.3195	E-Cadherin	E-Cadherin	Rabbit
EEF2|eEF2	EEF2	eEF2		1060	1938	FALSE	Use with Caution	CST.2332	eEF2	eEF2	Rabbit
EEF2K|eEF2K	EEF2K	eEF2K		1061	29904	FALSE	Valid	CST.3692	eEF2K	eEF2K	Rabbit
EGFR|EGFR	EGFR	EGFR		1120	1956	FALSE	Valid	CST.2232	EGFR	EGFR	Rabbit
EGFR|EGFR_pY1068	EGFR	EGFR_pY1068	pY1068	217	1956	TRUE	Use with Caution (also sees pHer2)	CST.2234	EGFR_pY1068	EGFR (phospho Y1068)	Rabbit
EGFR|EGFR_pY1173	EGFR	EGFR_pY1173	pY1173	221	1956	TRUE	Valid	Abcam.ab32578	EGFR_pY1173	EGFR (phospho Y1173)	Rabbit
EIF4E|eIF4E	EIF4E	eIF4E		722	1977	FALSE	Valid	CST.9742	eIF4E	eIF4E	Rabbit
EIF4G1|eIF4G	EIF4G1	eIF4G		1124	1981	FALSE	Use with Caution	CST.2498	eIF4G	eIF4G	Rabbit
ELK1|Elk1_pS383	ELK1	Elk1_pS383	pS383	228	2002	TRUE	Use with Caution	CST.9181	Elk1_pS383	Elk1 (phospho S383)	Rabbit
MUC1|EMA	EMA	EMA		1350	4582	FALSE	Use with Caution	Dako.M061329-2	EMA	Epithelial Membrane Antigen	Mouse
ESR1|ER	ESR1	ER		238	2099	FALSE	Valid	Lab Vision.RM-9101	ER	Estrogen Receptor	Rabbit
ERCC1|ERCC1	ERCC1	ERCC1		1357	2067	FALSE	Valid	Santa Cruz.sc-17809	ERCC1	ERCC1	Mouse
ERCC5|ERCC5	ERCC5	ERCC5		1355	2073	FALSE	Use with Caution	ProteinTech.11331-1-AP	ERCC5	ERCC5	Rabbit
ETS1|Ets-1	ETS1	Ets-1		1200	2113	FALSE	Valid	Bethyl.A303-501A	Ets-1	Ets-1	Rabbit
PTK2|FAK	PTK2	FAK		252	5747	FALSE	Use with Caution	Abcam.ab40794	FAK	FAK	Rabbit
PTK2|FAK_pY397	PTK2	FAK_pY397	pY397	1227	5747	TRUE	Valid	CST.3283	FAK_pY397	FAK (phospho Y397)	Rabbit
FASN|FASN	FASN	FASN		1156	2194	FALSE	Valid	CST.3180	FASN	Fatty Acid Synthase	Rabbit
FN1|Fibronectin	FN1	Fibronectin		262	2335	FALSE	Valid	Epitomics.1574-1	Fibronectin	Fibronectin	Rabbit
FOXM1|FoxM1	FOXM1	FoxM1		1123	2305	FALSE	Valid	CST.5436	FoxM1	FoxM1	Rabbit
FOXO3|FoxO3a	FOX3	FoxO3a		1122	2309	FALSE	Use with Caution	CST.2497	FoxO3a	FoxO3a	Rabbit
FOXO3|FoxO3a_pS318_S321	FOXO3	FoxO3a_pS318_S321	pS318_S321	270	2309	TRUE	Use with Caution	CST.9465	FoxO3a_pS318_S321	FoxO3a (phospho S318/S321)	Rabbit
FRA1|FRA-1	FOSL1	FRA-1		1184	NA	FALSE	Use with Caution	Santa Cruz.sc-605	FRA-1	FRA-1	Rabbit
G6PD|G6PD	G6PD	G6PD		1155	2539	FALSE	Valid	Santa Cruz.sc-373887	G6PD	G6PD	Mouse
GAB2|Gab2	GAB2	Gab2		943	9846	FALSE	Valid	CST.3239	Gab2	Gab2	Rabbit
GAPDH|GAPDH	GAPDH	GAPDH		274	2597	FALSE	Use with Caution	Life Technologies.AM4300	GAPDH	GAPDH	Mouse
GATA3|GATA3	GATA3	GATA3		764	2625	FALSE	Valid	BD Biosciences.558686	GATA3	GATA3	Mouse
KAT2A|GCN5L2	KAT2A	GCN5L2		1263	2648	FALSE	Valid	CST.3305	GCN5L2	GCN5L2	Rabbit
GLUD1|Glutamate-D1-2	GLUD	Glutamate-D1-2		1617	2746	FALSE	Use with Caution	CST.12793	Glutamate-D1-2	Glutamate Dehydrogenase1/2	Rabbit
GLS|Glutaminase	GLS	Glutaminase		1491	2744	FALSE	Use with Caution	Abcam.ab156876	Glutaminase	Glutaminase	Rabbit
PYGB|GPBB	PYGM	GPBB		1248	5834	FALSE	Valid	Novus Biologicals.NBP1-32799	GPBB	GPBB	Rabbit
GSK3A/GSK3B|GSK-3a-b	GSK3A/GSK3B	GSK-3a-b		284	NA	FALSE	Valid	Santa Cruz.sc-7291	GSK-3a-b	GSK-3alpha/beta	Mouse
GSK3A/GSK3B|GSK-3a-b_pS21_S9	GSK3A GSK3B	GSK-3a-b_pS21_S9	pS21_S9	285	NA	TRUE	Valid	CST.9331	GSK-3a-b_pS21_S9	GSK-3alpha/beta (phospho S21/S9)	Rabbit
GYS1|Gys	GYS1	Gys		1035	2997	FALSE	Valid	CST.3886	Gys	Glycogen Synthase	Rabbit
GYS1|Gys_pS641	GYS1	Gys_pS641	pS641	1036	2997	TRUE	Valid	CST.3891	Gys_pS641	Glycogen Synthase (phospho S641)	Rabbit
H2AX|H2AX_pS140	H2AFX	H2AX_pS140	pS140	1409	NA	TRUE	Use with Caution	Pierce Biotechnology.MA1-2022	H2AX_pS140	H2AX (phospho S140)	Mouse
ERBB2|HER2	ERBB2	HER2		1038	2064	FALSE	Valid	Lab Vision.MS-325-P1	HER2	ErbB2/HER2	Mouse
ERBB2|HER2_pY1248	ERBB2	HER2_pY1248	pY1248	1075	2064	TRUE	Use with Caution (likely sees pEGFR)	R&D Systems.AF1768	HER2_pY1248	ErbB2/HER2 (phospho Y1248)	Rabbit
ERBB3|HER3	ERBB3	HER3		911	2065	FALSE	Valid	Santa Cruz.sc-285	HER3	ErbB3/HER3	Rabbit
ERBB3|HER3_pY1289	ERBB3	HER3_pY1289	pY1289	728	2065	TRUE	Use with Caution	CST.4791	HER3_pY1289	ErbB3/HER3 (phospho Y1289)	Rabbit
NRG1|Heregulin	NRG1	Heregulin		890	3084	FALSE	Valid	CST.2573	Heregulin	Heregulin	Rabbit
HES1|HES1	HES1	HES1		1582	3280	FALSE	Valid	CST.11988	HES1	HES1	Rabbit
HK2|Hexokinase-II	HK2	Hexokinase-II		1023	3099	FALSE	Valid	CST.2867	Hexokinase-II	Hexokinase II	Rabbit
BIRC2|HIAP	BIRC2	HIAP		930	329	FALSE	Use with Caution	Millipore.07-759	HIAP	HIAP	Rabbit
HIF1A|Hif-1-alpha	HIF1A	Hif-1-alpha		1402	3091	FALSE	Use with Caution	BD Biosciences.610958	Hif-1-alpha	Hif-1 alpha	Mouse
H3F3A/H3F3B|Histone-H3	HIST3H3	Histone-H3		1250	NA	FALSE	Valid	Abcam.ab1791	Histone-H3	Histone H3	Rabbit
HSP27|HSP27	HSBP1	HSP27		321	NA	FALSE	Use with Caution	CST.2402	HSP27	HSP27	Mouse
HSBP1|HSP27_pS82	HSBP1	HSP27_pS82	pS82	323	3281	TRUE	Valid	CST.2401	HSP27_pS82	HSP27 (phospho S82)	Rabbit
HSP70|HSP70	HSPA1A	HSP70		325	NA	FALSE	Use with Caution	CST.4872	HSP70	HSP70	Rabbit
IGF1R|IGF1R_pY1135_Y1136	IGF1R	IGF1R_pY1135_Y1136	pY1135_Y1136	1221	3480	TRUE	Valid	CST.3024	IGF1R_pY1135_Y1136	IGF1R (phospho Y1135/Y1136)	Rabbit
IGFBP2|IGFBP2	IGFBP2	IGFBP2		335	3485	FALSE	Valid	CST.3922	IGFBP2	IGFBP2	Rabbit
IGFBP5|IGFBP5	IGFBP5	IGFBP5		1314	3488	FALSE	Use with Caution	Santa Cruz.sc-6006	IGFBP5	IGFBP5	Goat
INSR|IGFRb	IGF1R	IGFRb		336	3643	FALSE	Use with Caution	CST.3027	IGFRb	IGFRb	Rabbit
INPP4B|INPP4b	INPP4B	INPP4b		1065	8821	FALSE	Valid	CST.4039	INPP4b	INPP4b	Rabbit
IRF1|IRF-1	IRF1	IRF-1		1316	3659	FALSE	Use with Caution	Santa Cruz.sc-497	IRF-1	IRF-1	Rabbit
IRS1|IRS1	IRS1	IRS1		802	3667	FALSE	Valid	Millipore.06-248	IRS1	IRS1	Rabbit
COPS5|JAB1	JAB1	JAB1		1394	10987	FALSE	Use with Caution	Santa Cruz.sc-13157	JAB1	JAB1	Mouse
JAG1|Jagged1	JAG1	Jagged1		1413	182	FALSE	Valid	Abcam.ab109536	Jagged1	Jagged1	Rabbit
JAK2|Jak2	JAK2	Jak2		1166	3717	FALSE	Valid	CST.3230	Jak2	Jak2	Rabbit
MAPK8|JNK_pT183_Y185	MAPK8	JNK_pT183_Y185	pT183_Y185	888	5599	TRUE	Valid	CST.4668	JNK_pT183_Y185	JNK/SAPK (phospho T183/Y185)	Rabbit
MAPK9|JNK2	MAPK9	JNK2		380	5601	FALSE	Use with Caution	CST.4672	JNK2	JNK2	Rabbit
LC3AB|LC3A-B	LC3AB	LC3A-B		1618	NA	FALSE	Use with Caution	CST.4108	LC3A-B	LC3A/B	Rabbit
LCK|Lck	LCK	Lck		397	3932	FALSE	Valid	CST.2752	Lck	Lck	Rabbit
LDHA|LDHA	LDHA	LDHA		976	3939	FALSE	Use with Caution	CST.3582	LDHA	LDHA	Rabbit
MAPK1/MAPK3|MAPK_pT202_Y204	MAPK3	MAPK_pT202_Y204	pT202_Y204	405	NA	TRUE	Valid	CST.4377	MAPK_pT202_Y204	MAPK (phospho T202/Y204)	Rabbit
MCL1|Mcl-1	MCL1	Mcl-1		1222	4170	FALSE	Valid	CST.5453	Mcl-1	Mcl 1	Rabbit
SLC16A4|MCT4	SLC16A4	MCT4		1633	9122	FALSE	Valid	Millipore.AB3314P	MCT4	Monocarboxylic Acid Transporter 4	Rabbit
MDM2|MDM2_pS166	MDM2	MDM2_pS166	pS166	1164	4193	TRUE	Valid	CST.3521	MDM2_pS166	MDM2 (phospho S166)	Rabbit
MAP2K1|MEK1	MAP2K1	MEK1		417	5604	FALSE	Valid	Epitomics.1235-1	MEK1	MEK1	Rabbit
MAP2K1/MAP2K2|MEK1_pS217_S221	MAP2K1	MEK1_pS217_S221	pS217_S221	1076	NA	TRUE	Valid	CST.9154	MEK1_pS217_S221	MEK1 (phospho S217/S221)	Rabbit
MAP2K2|MEK2	MAP2K2	MEK2		1243	5605	FALSE	Valid	CST.9125	MEK2	MEK2	Rabbit
NF2|Merlin	NF2	Merlin		1046	4771	FALSE	Use with Caution	Novus Biologicals.22710002	Merlin	Merlin/NF2	Rabbit
MIF|MIF	MIF	MIF		1323	4282	FALSE	Use with Caution	Santa Cruz.sc-20121	MIF	MIF	Rabbit
ERRFI1|MIG6	ERRFI1	MIG6		1062	54206	FALSE	Valid	Sigma-Aldrich.WH0054206M1	MIG6	ERRFI1/MIG6	Mouse
MT-CO2|Mitochondria	MTCO2	Mitochondria		1067	NA	FALSE	Valid	Abcam.ab3298	Mitochondria	Mitochondria	Mouse
MMP2|MMP2	MMP2	MMP2		435	4313	FALSE	Valid	CST.4022	MMP2	MMP2	Rabbit
MKNK1|Mnk1	MKNK1	Mnk1		1005	8569	FALSE	Valid	CST.2195	Mnk1	Mnk1	Rabbit
MSH2|MSH2	MSH2	MSH2		905	4436	FALSE	Valid	CST.2850	MSH2	MSH2	Mouse
MSH6|MSH6	MSH6	MSH6		1063	2956	FALSE	Use with Caution	Novus Biologicals.22030002	MSH6	MSH6	Rabbit
MTOR|mTOR	MTOR	mTOR		444	2475	FALSE	Valid	CST.2983	mTOR	mTOR	Rabbit
MTOR|mTOR_pS2448	MTOR	mTOR_pS2448	pS2448	446	2475	TRUE	Use with Caution	CST.2971	mTOR_pS2448	mTOR (phospho S2448)	Rabbit
MYH11|Myosin-11	MYH11	Myosin-11		1139	4629	FALSE	Valid	Novus Biologicals.21370002	Myosin-11	Myosin heavy chain 11	Rabbit
MYH9|Myosin-IIa_pS1943	MYO2A	Myosin-IIa_pS1943	pS1943	1160	4627	TRUE	Valid	CST.5026	Myosin-IIa_pS1943	Myosin IIa (phospho S1943)	Rabbit
MYT1|Myt1	MYT1	Myt1		1803	4661	FALSE	Use with Caution	CST.4282	Myt1	Myt1	Rabbit
NAPSA|NAPSIN-A	NAPSA	NAPSIN-A		1274	9476	FALSE	Use with Caution	Abcam.ab129189	NAPSIN-A	NAPSIN A	Rabbit
CDH2|N-Cadherin	CDH2	N-Cadherin		452	1000	FALSE	Valid	CST.4061	N-Cadherin	N-Cadherin	Rabbit
NDRG1|NDRG1_pT346	NDRG1	NDRG1_pT346	pT346	1126	10397	TRUE	Valid	CST.3217	NDRG1_pT346	NDRG1 (phospho T346)	Rabbit
NDUFB4|NDUFB4	NDUFB4	NDUFB4		1345	4710	FALSE	Valid	Abcam.ab110243	NDUFB4	NDUFB4	Mouse
RELA|NF-kB-p65_pS536	NFKB1	NF-kB-p65_pS536	pS536	457	5970	TRUE	Use with Caution	CST.3033	NF-kB-p65_pS536	NF-kappaB p65 (phospho S536)	Rabbit
NOTCH1|Notch1	NOTCH1	Notch1		1064	4851	FALSE	Valid	CST.3268	Notch1	Notch1	Rabbit
NOTCH3|Notch3	NOTCH3	Notch3		767	4854	FALSE	Use with Caution	Santa Cruz.sc-5593	Notch3	Notch3	Rabbit
NRAS|N-Ras	NRAS	N-Ras		1136	4893	FALSE	Valid	Santa Cruz.sc-31	N-Ras	N-Ras	Mouse
CDKN2A|p16INK4a	CDKN2A	p16INK4a		1231	1029	FALSE	Valid	Abcam.ab81278	p16INK4a	CDKN2A/p16INK4a	Rabbit
CDKN1A|p21	CDKN1A	p21		470	1026	FALSE	Valid	Santa Cruz.sc-397	p21	p21	Rabbit
CDKN1B|p27_pT157	CDKN1B	p27_pT157	pT157	842	1027	TRUE	Use with Caution	R&D Systems.AF1555	p27_pT157	p27/Kip1 (phospho T157)	Rabbit
CDKN1B|p27_pT198	CDKN1B	p27_pT198	pT198	878	1027	TRUE	Valid	Abcam.ab64949	p27_pT198	p27/KIP 1 (phospho T198)	Rabbit
CDKN1B|p27-Kip-1	CDKN1B	p27-Kip-1		897	1027	FALSE	Valid	Abcam.ab32034	p27-Kip-1	p27 KIP 1	Rabbit
MAPK14|p38_pT180_Y182	MAPK14	p38_pT180_Y182	pT180_Y182	479	1432	TRUE	Valid	CST.9211	p38_pT180_Y182	p38 MAPK (phospho T180/Y182)	Rabbit
MAPK14|p38-MAPK	MAPK14	p38-MAPK		#N/A	1432	FALSE	Valid	CST.9212	p38-MAPK	p38 MAPK	Rabbit
MAPK3|p44-42-MAPK	MAPK3	p44-42-MAPK		1119	5595	FALSE	Valid	CST.4695	p44-42-MAPK	p44/42 MAPK	Rabbit
TP53|p53	TP53	p53		481	7157	FALSE	Use with Caution	CST.9282	p53	p53	Rabbit
RPS6KB1|p70-S6K_pT389	RPS6KB1	p70-S6K_pT389	pT389	494	6198	TRUE	Valid	CST.9205	p70-S6K_pT389	p70 S6 Kinase (phospho T389)	Rabbit
RPS6KB1|p70-S6K1	RPS6KB1	p70-S6K1		493	6198	FALSE	Valid	Abcam.ab32529	p70-S6K1	p70/S6K1	Rabbit
RPS6K|p90RSK_pT573	RPS6K	p90RSK_pT573	pT573	1178	NA	TRUE	Use with Caution	CST.9346	p90RSK_pT573	p90RSK (phospho T573)	Rabbit
SERPINE1|PAI-1	SERPINE1	PAI-1		499	5054	FALSE	Valid	BD Biosciences.612024	PAI-1	PAI-1	Mouse
PAR|PAR	PAR	PAR		1370	NA	FALSE	Use with Caution	Trevigen.4336-BPC-100	PAR	PAR	Rabbit
PARP1|PARP1	PARP1	PARP1		1372	142	FALSE	Valid	Santa Cruz.sc-7150	PARP1	PARP-1	Rabbit
PXN|Paxillin	PXN	Paxillin		505	5829	FALSE	Use with Caution	Epitomics.1500-1	Paxillin	Paxillin	Rabbit
CDH3|P-Cadherin	CDH3	P-Cadherin		509	1001	FALSE	Use with Caution	CST.2130	P-Cadherin	P-Cadherin	Rabbit
PCNA|PCNA	PCNA	PCNA		511	5111	FALSE	Use with Caution	Abcam.ab29	PCNA	PCNA	Mouse
CD274|Pdcd-1L1	PDCD1	Pdcd-1L1		1234	29126	FALSE	Use with Caution	Santa Cruz.sc-19090	Pdcd-1L1	Pdcd-1L1	Goat
PDCD4|Pdcd4	PDCD4	Pdcd4		816	27250	FALSE	Use with Caution	Rockland.600-401-965	Pdcd4	Pdcd4	Rabbit
PDGFRB|PDGFR-b	PDGFR	PDGFR-b		1225	5159	FALSE	Valid	CST.3169	PDGFR-b	PDGFR beta	Rabbit
PDPK1|PDK1	PDK1	PDK1		515	5170	FALSE	Valid	CST.3062	PDK1	PDK1	Rabbit
PDPK1|PDK1_pS241	PDK1	PDK1_pS241	pS241	516	5170	TRUE	Valid	CST.3061	PDK1_pS241	PDK1 (phospho S241)	Rabbit
CD274|PD-L1	CD274	PD-L1		1724	29126	FALSE	Use with Caution	CST.13684	PD-L1	PD-L1	Rabbit
PEA15|PEA-15	PEA15	PEA-15		1017	8682	FALSE	Valid	CST.2780	PEA-15	PEA-15	Rabbit
PEA15|PEA-15_pS116	PEA15	PEA-15_pS116	pS116	1018	8682	TRUE	Valid	Invitrogen.44-836G	PEA-15_pS116	PED/PEA-15 (phospho S116)	Rabbit
PIK3CA|PI3K-p110-a	PIK3C2A	PI3K-p110-a		808	5290	FALSE	Use with Caution	CST.4255	PI3K-p110-a	PI3 Kinase p110 alpha	Rabbit
PIK3CB|PI3K-p110-b	PIK3BC	PI3K-p110-b		1330	5291	FALSE	Use with Caution	Santa Cruz.sc-376412	PI3K-p110-b	PI3K p110 beta	Mouse
PIK3R1|PI3K-p85	PIK3R1	PI3K-p85		523	5295	FALSE	Valid	Millipore.06-195	PI3K-p85	PI3K p85	Rabbit
PRKAR1A|PKA-a	PRKAR1A	PKA-a		1667	5573	FALSE	Valid	CST.5675	PKA-a	PKA RI alpha	Rabbit
PRKCA|PKC-a	PRKCA	PKC-a		529	5578	FALSE	Valid	Millipore.05-154	PKC-a	PKC alpha	Mouse
PRKCA|PKC-a_pS657	PRKCA	PKC-a_pS657	pS657	530	5578	TRUE	Use with Caution	Millipore.06-822	PKC-a_pS657	PKC alpha (phospho S657)	Rabbit
PRKCA/PRKCBPRKCD/PRKCE/PRKCH/PRKCQ|PKC-b-II_pS660	PRKCB	PKC-b-II_pS660	pS660	1137	NA	TRUE	Valid	CST.9371	PKC-b-II_pS660	PKC beta II (phospho S660)	Rabbit
PRKCD|PKC-delta_pS664	PRKCD	PKC-delta_pS664	pS664	932	5580	TRUE	Valid	Millipore.07-875	PKC-delta_pS664	PKC delta (phospho S664)	Rabbit
PKM|PKM2	PKM2	PKM2		1025	5315	FALSE	Use with Caution	CST.4053	PKM2	PKM2	Rabbit
PLCG2|PLC-gamma2_pY759	PLCG2	PLC-gamma2_pY759	pY759	1030	5336	TRUE	Use with Caution	CST.3874	PLC-gamma2_pY759	PLC gamma2 (phospho Y759)	Rabbit
PLK1|PLK1	PLK1	PLK1		754	5347	FALSE	Use with Caution	CST.4513	PLK1	PLK1	Rabbit
PMS2|PMS2	PMS2	PMS2		1246	5395	FALSE	Valid	Novus Biologicals.22510002	PMS2	PMS2	Rabbit
VDAC1|Porin	VDAC1	Porin		1254	7416	FALSE	Valid	Abcam.ab14734	Porin	VDAC1/Porin	Mouse
PGR|PR	PGR	PR		549	5241	FALSE	Valid	Abcam.ab32085	PR	Progesterone Repector	Rabbit
AKT1S1|PRAS40	AKT1S1	PRAS40		738	84335	FALSE	Use with Caution	Invitrogen.AHO1031	PRAS40	PRAS40	Mouse
AKT1S1|PRAS40_pT246	AKT1S1	PRAS40_pT246	pT246	739	84335	TRUE	Valid	Life Technologies.441100G	PRAS40_pT246	PRAS40 (phospho T246)	Rabbit
PREX1|PREX1	PREX1	PREX1		1204	57580	FALSE	Valid	Abcam.ab102739	PREX1	PREX1	Rabbit
PTEN|PTEN	PTEN	PTEN		566	5728	FALSE	Valid	CST.9552	PTEN	PTEN	Rabbit
BBC3|Puma	BBC3	Puma		1290	27113	FALSE	Use with Caution	CST.4976	Puma	Puma	Rabbit
PYGM|PYGM	PYGM	PYGM		1245	5837	FALSE	Use with Caution	Novus Biologicals.H00005837-M10	PYGM	PYGM	Mouse
RAB11A/RAB11B|Rab11-R-E	RAB11A	Rab11-R-E		#N/A	NA	FALSE	Under Evaluation	CST.3539	Rab11-R-E	Rab11	Rabbit
RAB25|Rab25	RAB25	Rab25		1150	57111	FALSE	Valid	CST.4314	Rab25	Rab25	Rabbit
RAD50|Rad50	RAD50	Rad50		987	10111	FALSE	Valid	Millipore.05-525	Rad50	Rad50	Mouse
RAD51|Rad51	RAD51	Rad51		1262	5888	FALSE	Valid	CST.8875	Rad51	Rad51	Rabbit
RPTOR|Raptor	RPTOR	Raptor		1128	57521	FALSE	Valid	CST.2280	Raptor	Raptor	Rabbit
RB1|Rb_pS807_S811	RB1	Rb_pS807_S811	pS807_S811	557	5925	TRUE	Valid	CST.9308	Rb_pS807_S811	Rb (phospho S807/S811)	Rabbit
RBM15|RBM15	RBM15	RBM15		1138	64783	FALSE	Valid	Novus Biologicals.21390002	RBM15	RBM15	Rabbit
RB1|Rb-M-Q	RB1	Rb-M-Q		#N/A	5925	FALSE	**Used for QC**	CST.9309	Rb-M-Q	Rb	Mouse
RHEB|Rheb	RHEB	Rheb		847	6009	FALSE	Use with Caution	R&D Systems.MAB3426	Rheb	Rheb	Mouse
RICTOR|Rictor	RICTOR	Rictor		1129	253260	FALSE	Use with Caution	CST.2114	Rictor	Rictor	Rabbit
RICTOR|Rictor_pT1135	RICTOR	Rictor_pT1135	pT1135	1130	253260	TRUE	Valid	CST.3806	Rictor_pT1135	Rictor (phospho T1135)	Rabbit
ROCK1|Rock-1	ROCK1	Rock-1		1334	6093	FALSE	Use with Caution	Santa Cruz.sc-5560	Rock-1	Rock-1	Rabbit
RPA2|RPA32_pS4_S8	RPA32	RPA32_pS4_S8	pS4_S8	1375	6118	TRUE	Use with Caution	Bethyl.A300-245A	RPA32_pS4_S8	RPA32 (Phospho S4/S8)	Rabbit
RPA2|RPA32-T-C	RPA32	RPA32-T-C		#N/A	6118	FALSE	Use with Caution	CST.2208	RPA32-T-C	RPA32	Rat
RPS6KA1/RPS6KA2/RPS6KA3|RSK	RPS6KA1	RSK		759	NA	FALSE	Use with Caution	CST.9347	RSK	RSK	Rabbit
RPS6|S6	RPS6	S6		1874	6194	FALSE	Valid	CST.2317	S6	S6 Ribosomal Protein	Mouse
RPS6|S6_pS235_S236	RPS6	S6_pS235_S236	pS235_S236	600	6194	TRUE	Valid	CST.2211	S6_pS235_S236	S6 (phospho S235/S236)	Rabbit
RPS6|S6_pS240_S244	RPS6	S6_pS240_S244	pS240_S244	601	6194	TRUE	Valid	CST.2215	S6_pS240_S244	S6 (phospho S240/S244)	Rabbit
SCD|SCD	SCD	SCD		1127	6319	FALSE	Valid	Santa Cruz.sc-58420	SCD	SCD	Mouse
SDHA|SDHA	SDHA	SDHA		1339	6389	FALSE	Valid	CST.11998	SDHA	SDHA	Rabbit
SRSF1|SF2	SRSF1	SF2		1131	6426	FALSE	Valid	Invitrogen.32-4500	SF2	SF2/ASF	Mouse
SHC1|Shc_pY317	SHC1	Shc_pY317	pY317	1031	6464	TRUE	Valid	CST.2431	Shc_pY317	Shc (phospho Y317)	Rabbit
PTPN11|SHP-2_pY542	PTPN11	SHP-2_pY542	pY542	1180	5781	TRUE	Use with Caution	CST.3751	SHP-2_pY542	SHP-2 (phospho Y542)	Rabbit
SLC1A5|SLC1A5	SLC1A5	SLC1A5		1313	6510	FALSE	Use with Caution	Sigma-Aldrich.HPA035240	SLC1A5	SLC1A5	Rabbit
DIABLO|Smac-M-Q	DIABLO	Smac-M-Q		#N/A	56616	FALSE	**Used for QC**	CST.2954	Smac-M-Q	Smac/Diablo	Mouse
SMAD1|Smad1	SMAD1	Smad1		922	4086	FALSE	Valid	Abcam.ab33902	Smad1	Smad1	Rabbit
SMAD3|Smad3	SMAD3	Smad3		796	4088	FALSE	Valid	Abcam.ab40854	Smad3	Smad3	Rabbit
SMAD4|Smad4	SMAD4	Smad4		920	4089	FALSE	Valid	Santa Cruz.sc-7966	Smad4	Smad4	Mouse
SNAI1|Snail	SNAI1	Snail		616	6615	FALSE	**Used for QC**	CST.3895	Snail	Snail	Mouse
SOD2|SOD2	SOD2	SOD2		1328	6648	FALSE	Valid	CST.13141	SOD2	SOD2	Rabbit
SOX2|Sox2	SOX2	Sox2		1670	6657	FALSE	Valid	CST.2748	Sox2	Sox2	Rabbit
SRC|Src	SRC	Src		621	6714	FALSE	Valid	Millipore.05-184	Src	Src	Mouse
SRC/LYN/FYNLCK/YES1/HCK|Src_pY416	SRC	Src_pY416	pY416	623	NA	TRUE	Valid	CST.2101	Src_pY416	Src Family (phospho Y416)	Rabbit
SRC/YES1/FYNFGR|Src_pY527	SRC	Src_pY527	pY527	626	NA	TRUE	Valid	CST.2105	Src_pY527	Src (phospho Y527)	Rabbit
STAT3|Stat3	STAT3	Stat3		1197	6774	FALSE	Use with Caution	CST.4904	Stat3	Stat3	Rabbit
STAT3|Stat3_pY705	STAT3	Stat3_pY705	pY705	637	6774	TRUE	Valid	CST.9131	Stat3_pY705	Stat3 (phospho Y705)	Rabbit
STAT5A|Stat5a	STAT5A	Stat5a		638	6776	FALSE	Valid	Abcam.ab32043	Stat5a	Stat5a	Rabbit
STMN1|Stathmin-1	STMN1	Stathmin-1		718	3925	FALSE	Valid	Abcam.ab52630	Stathmin-1	Stathmin 1	Rabbit
SYK|Syk	SYK	Syk		1033	6850	FALSE	Valid	Santa Cruz.sc-1240	Syk	Syk	Mouse
TAU|Tau	MAPT	Tau		646	NA	FALSE	Use with Caution	Millipore.05-348	Tau	Tau	Mouse
WWRT1|TAZ	TAZ	TAZ		1848	NA	FALSE	Valid	CST.4883	TAZ	TAZ	Rabbit
TFAM|TFAM	TFAM	TFAM		1333	7019	FALSE	Valid	CST.7495	TFAM	TFAM	Rabbit
TFRC|TFRC	TFRC	TFRC		1140	7037	FALSE	Valid	Novus Biologicals.22500002	TFRC	Transferrin Receptor	Rabbit
C12ORF5|TIGAR	TIGAR	TIGAR		1107	NA	FALSE	Valid	Abcam.ab137573	TIGAR	TIGAR	Rabbit
TGM2|Transglutaminase	TGM2	Transglutaminase		908	7052	FALSE	Valid	Lab Vision.MS-224-P1	Transglutaminase	Transglutaminase II	Mouse
TSC1|TSC1	TSC1	TSC1		1125	7248	FALSE	Use with Caution	CST.4906	TSC1	TSC1/Hamartin	Rabbit
NKX2-1|TTF1	TTF1	TTF1		1081	7080	FALSE	Valid	Abcam.ab76013	TTF1	TTF1	Rabbit
TSC2|Tuberin	TSC2	Tuberin		670	7249	FALSE	Valid	Abcam.ab32554	Tuberin	Tuberin	Rabbit
TSC2|Tuberin_pT1462	TSC2	Tuberin_pT1462	pT1462	671	7249	TRUE	Valid	CST.3617	Tuberin_pT1462	TSC2/Tuberin (phospho T1462)	Rabbit
TWIST2|TWIST	TWIST1	TWIST		1353	117581	FALSE	Use with Caution	Santa Cruz.sc-81417	TWIST	Twist	Mouse
TYRO3|Tyro3	TYRO3	Tyro3		1080	7301	FALSE	Valid	CST.5585	Tyro3	Tyro3	Rabbit
UBAC1|UBAC1	UBAC1	UBAC1		1270	10422	FALSE	Valid	Sigma-Aldrich.HPA005651	UBAC1	UBAC1	Rabbit
H2BFM|Ubq-Histone-H2B	H2BFM	Ubq-Histone-H2B	ubiquitin	1604	286436	FALSE	Use with Caution	Millipore.05-1312	Ubq-Histone-H2B	Ubiquityl Histone H2B	Mouse
UGT1A1|UGT1A	UGT1A	UGT1A		1267	54658	FALSE	Valid	Santa Cruz.sc-271268	UGT1A	UGT1A	Mouse
KDR|VEGFR-2	KDR	VEGFR-2		688	3791	FALSE	Valid	CST.2479	VEGFR-2	VEGF Receptor 2	Rabbit
EPPK1|VHL-EPPK1-M-E	VHL	VHL-EPPK1-M-E		#N/A	83481	FALSE	Under Evaluation (Targeting EPPK1)	BD Biosciences.556347	VHL-EPPK1-M-E	**VHL-EPPK1**	Mouse
VIM|Vimentin	VIM	Vimentin		1393	7431	FALSE	Use with Caution	Dako.M0725	Vimentin	Vimentin	Mouse
WEE1|Wee1	WEE1	Wee1		1802	7465	FALSE	Use with Caution	CST.4936	Wee1	Wee1	Rabbit
XBP1|XBP-1	XBP1	XBP-1		#N/A	7494	FALSE	Use with Caution	Santa Cruz.sc-32136	XBP-1	XBP1	Goat
XIAP|XIAP	XIAP	XIAP		699	331	FALSE	Use with Caution	CST.2042	XIAP	XIAP	Rabbit
XPA|XPA	XPA	XPA		1359	7507	FALSE	Valid	Santa Cruz.sc-56813	XPA	XPA	Mouse
ERCC4|XPF	XPF	XPF		1354	2072	FALSE	Use with Caution	Abcam.ab3299	XPF	XPF	Mouse
XRCC1|XRCC1	XRCC1	XRCC1		906	7515	FALSE	Use with Caution	CST.2735	XRCC1	XRCC1	Rabbit
YAP1|YAP_pS127-R-E	YAP1	YAP_pS127-R-E	pS127	#N/A	10413	TRUE	Under Evaluation	CST.4911	YAP_pS127-R-E	YAP (phospho S127)	Rabbit
YAP1|YAP-R-E	YAP1	YAP-R-E		#N/A	10413	FALSE	Under Evaluation	Santa Cruz.sc-15407	YAP-R-E	YAP	Rabbit
YBX1|YB1	YBX1	YB1		700	4904	FALSE	Valid	Novus Biologicals.17250002	YB1	YB1	Rabbit
YBX1|YB1_pS102	YBX1	YB1_pS102	pS102	835	4904	TRUE	Valid	CST.2900	YB1_pS102	YB1 (phospho S102)	Rabbit

## Sheet: Table_S5
Exonic non-synonymous SNVs and indels in 27 CRC cell lines (targeted sequencing of 612 genes)
Detected variants included in the DBSNP138NonFlagged (not marked as clinical relevant variants) were excluded.
Sample	Chr	Pos	Reference base (+ strand)	Alternative base (+ strand)	DBSNP138	Ref.reads	Alt.reads	Type	Gene	MS.status	Amino.acid.change(Annovar)
CACO2	chr1	65330523	T	C	.	1	173	nonsynonymous SNV	JAK1	MSS	NM_002227:c.A1123G:p.I375V
CACO2	chr1	156851382	G	A	rs35669708	19	37	nonsynonymous SNV	NTRK1	MSS	NM_001012331:c.G2321A:p.R774Q
CACO2	chr1	227222404	C	T	.	241	42	nonsynonymous SNV	CDC42BPA	MSS	NM_014826:c.G3080A:p.G1027E
CACO2	chr1	228503690	C	T	.	32	17	synonymous SNV	OBSCN	MSS	NM_001098623:c.C13155T:p.N4385N
CACO2	chr2	30143240	C	T	.	56	41	nonsynonymous SNV	ALK	MSS	NM_004304:c.G286A:p.A96T
CACO2	chr2	179426553	C	T	.	214	127	stopgain SNV	TTN	MSS	NM_003319:c.G57111A:p.W19037X
CACO2	chr2	179431439	G	C	.	159	211	nonsynonymous SNV	TTN	MSS	NM_003319:c.C52225G:p.P17409A
CACO2	chr2	179441461	T	G	.	118	205	nonsynonymous SNV	TTN	MSS	NM_003319:c.A42315C:p.E14105D
CACO2	chr2	179582745	C	-	.	232	105	frameshift deletion	TTN	MSS	NM_133378:c.21256delG:p.D7086fs
CACO2	chr2	179585704	C	G	.	244	128	nonsynonymous SNV	TTN	MSS	NM_133378:c.G19310C:p.C6437S
CACO2	chr2	222301199	T	G	.	318	62	nonsynonymous SNV	EPHA4	MSS	NM_004438:c.A2266C:p.S756R
CACO2	chr3	41267063	G	C	.	46	120	nonsynonymous SNV	CTNNB1	MSS	NM_001098209:c.G734C:p.G245A
CACO2	chr3	89156926	C	T	.	139	99	nonsynonymous SNV	EPHA3	MSS	NM_005233:c.C28T:p.L10F
CACO2	chr5	112175390	C	T	rs121913328	0	246	stopgain SNV	APC	MSS	NM_001127511:c.C4045T:p.Q1349X
CACO2	chr6	117629958	G	A	.	74	55	synonymous SNV	ROS1	MSS	NM_002944:c.C6568T:p.L2190L
CACO2	chr6	117674165	G	T	.	184	193	nonsynonymous SNV	ROS1	MSS	NM_002944:c.C4309A:p.Q1437K
CACO2	chr10	60027249	G	C	.	36	92	synonymous SNV	IPMK	MSS	NM_152230:c.C123G:p.R41R
CACO2	chr11	533938	A	G	.	117	24	nonsynonymous SNV	HRAS	MSS	NM_001130442:c.T118C:p.Y40H
CACO2	chr12	56491677	G	A	.	87	55	nonsynonymous SNV	ERBB3	MSS	NM_001982:c.G2569A:p.D857N
CACO2	chr12	120270583	-	TGA	.	100	98	nonframeshift insertion	CIT	MSS	NM_001206999:c.745_746insTCA:p.N249delinsSN
CACO2	chr14	35873835	C	T	.	41	36	nonsynonymous SNV	NFKBIA	MSS	NM_020529:c.G16A:p.E6K
CACO2	chr17	7578239	C	A	.	0	235	stopgain SNV	TP53	MSS	NM_000546:c.G610T:p.E204X
CACO2	chr20	62174799	G	-	.	67	379	frameshift deletion	SRMS	MSS	NM_080823:c.513delC:p.V171fs
CO115	chr1	11169408	T	C	.	62	52	synonymous SNV	MTOR	MSI	NM_004958:c.A7467G:p.K2489K
CO115	chr1	11297962	C	A	.	22	21	nonsynonymous SNV	MTOR	MSI	NM_004958:c.G2146T:p.G716C
CO115	chr1	11316059	T	C	.	42	28	nonsynonymous SNV	MTOR	MSI	NM_004958:c.A695G:p.Q232R
CO115	chr1	16462158	G	A	.	74	60	nonsynonymous SNV	EPHA2	MSI	NM_004431:c.C1420T:p.R474C
CO115	chr1	23111371	G	A	.	44	41	nonsynonymous SNV	EPHB2	MSI	NM_004442:c.G613A:p.A205T
CO115	chr1	23219406	A	-	.	7	13	frameshift deletion	EPHB2	MSI	NM_004442:c.1458delA:p.I486fs
CO115	chr1	26448426	TGAG	-	.	75	103	frameshift deletion	PDIK1L	MSI	NM_001243532:c.384_387del:p.128_129del
CO115	chr1	26448930	-	A	.	75	97	frameshift insertion	PDIK1L	MSI	NM_001243532:c.888_889insA:p.K296fs
CO115	chr1	27685310	C	T	.	19	31	nonsynonymous SNV	MAP3K6	MSI	NM_001297609:c.G2449A:p.G817R
CO115	chr1	65306997	T	-	.	105	112	frameshift deletion	JAK1	MSI	NM_002227:c.2580delA:p.K860fs
CO115	chr1	114976296	G	A	rs369393002	91	98	nonsynonymous SNV	TRIM33	MSI	NM_015906:c.C983T:p.A328V
CO115	chr1	115006045	T	C	.	75	87	nonsynonymous SNV	TRIM33	MSI	NM_015906:c.A779G:p.E260G
CO115	chr1	151206914	T	-	.	101	87	frameshift deletion	PIP5K1A	MSI	NM_001135636:c.845delT:p.L282fs
CO115	chr1	151280219	C	T	.	73	47	nonsynonymous SNV	PI4KB	MSI	NM_001198775:c.G17A:p.R6Q
CO115	chr1	153652142	C	T	.	59	40	synonymous SNV	NPR1	MSI	NM_000906:c.C558T:p.Y186Y
CO115	chr1	179077675	C	T	.	50	63	synonymous SNV	ABL2	MSI	NM_001168236:c.G2664A:p.E888E
CO115	chr1	179078220	A	C	.	11	13	nonsynonymous SNV	ABL2	MSI	NM_001168236:c.T2119G:p.C707G
CO115	chr1	179112081	T	C	.	53	57	synonymous SNV	ABL2	MSI	NM_001136000:c.A99G:p.L33L
CO115	chr1	204423824	A	G	.	72	54	nonsynonymous SNV	PIK3C2B	MSI	NM_002646:c.T2039C:p.L680P
CO115	chr1	204423909	A	C	.	68	67	nonsynonymous SNV	PIK3C2B	MSI	NM_002646:c.T1954G:p.F652V
CO115	chr1	205138472	C	A	.	101	122	nonsynonymous SNV	DSTYK	MSI	NM_015375:c.G1143T:p.Q381H
CO115	chr1	205273140	-	G	.	45	39	frameshift insertion	NUAK2	MSI	NM_030952:c.1325_1326insC:p.L442fs
CO115	chr1	206822279	T	C	.	86	80	nonsynonymous SNV	DYRK3	MSI	NM_003582:c.T1736C:p.L579P
CO115	chr1	220752860	CAAAGT	-	.	106	57	nonframeshift deletion	MARK1	MSI	NM_001286124:c.216_221del:p.72_74del
CO115	chr1	227335079	C	T	.	82	88	nonsynonymous SNV	CDC42BPA	MSI	NM_003607:c.G875A:p.G292E
CO115	chr1	228456404	T	C	.	78	67	nonsynonymous SNV	OBSCN	MSI	NM_001098623:c.T5035C:p.C1679R
CO115	chr1	228463511	C	T	.	13	12	nonsynonymous SNV	OBSCN	MSI	NM_001098623:c.C6004T:p.R2002W
CO115	chr1	228466468	T	A	.	58	41	nonsynonymous SNV	OBSCN	MSI	NM_001098623:c.T6938A:p.V2313E
CO115	chr1	228559450	G	-	.	60	59	frameshift deletion	OBSCN	MSI	NM_001098623:c.20971delG:p.G6991fs
CO115	chr1	233482260	C	T	.	83	71	nonsynonymous SNV	KIAA1804	MSI	NM_032435:c.C878T:p.A293V
CO115	chr2	12863605	G	A	.	20	32	nonsynonymous SNV	TRIB2	MSI	NM_021643:c.G490A:p.A164T
CO115	chr2	29446388	C	T	.	45	26	nonsynonymous SNV	ALK	MSI	NM_004304:c.G3179A:p.R1060H
CO115	chr2	69732721	G	A	.	39	43	nonsynonymous SNV	AAK1	MSI	NM_014911:c.C2249T:p.T750I
CO115	chr2	98349669	G	A	.	41	32	nonsynonymous SNV	ZAP70	MSI	NM_001079:c.G784A:p.A262T
CO115	chr2	102490608	A	G	.	48	44	synonymous SNV	MAP4K4	MSI	NM_001242559:c.A2700G:p.S900S
CO115	chr2	148657041	A	-	.	66	60	frameshift deletion	ACVR2A	MSI	NM_001616:c.278delA:p.E93fs
CO115	chr2	148683686	A	-	.	79	85	frameshift deletion	ACVR2A	MSI	NM_001278580:c.979delA:p.K327fs
CO115	chr2	171239635	C	T	.	89	64	nonsynonymous SNV	MYO3B	MSI	NM_001083615:c.C1121T:p.T374I
CO115	chr2	179396304	C	T	.	48	60	nonsynonymous SNV	TTN	MSI	NM_003319:c.G77843A:p.R25948H
CO115	chr2	179402414	T	C	.	76	67	nonsynonymous SNV	TTN	MSI	NM_003319:c.A72325G:p.I24109V
CO115	chr2	179408809	T	G	.	101	78	nonsynonymous SNV	TTN	MSI	NM_003319:c.A68867C:p.K22956T
CO115	chr2	179410955	G	T	.	115	122	synonymous SNV	TTN	MSI	NM_003319:c.C67908A:p.V22636V
CO115	chr2	179413601	C	T	.	104	93	nonsynonymous SNV	TTN	MSI	NM_003319:c.G65557A:p.D21853N
CO115	chr2	179452733	C	T	.	23	33	nonsynonymous SNV	TTN	MSI	NM_003319:c.G36206A:p.S12069N
CO115	chr2	179454784	T	C	.	69	62	synonymous SNV	TTN	MSI	NM_003319:c.A34473G:p.G11491G
CO115	chr2	179466070	G	A	.	47	31	nonsynonymous SNV	TTN	MSI	NM_003319:c.C28459T:p.R9487C
CO115	chr2	179500175	G	A	.	82	88	nonsynonymous SNV	TTN	MSI	NM_003319:c.C14681T:p.T4894I
CO115	chr2	179594829	AG	-	.	29	33	frameshift deletion	TTN	MSI	NM_133378:c.14565_14566del:p.4855_4856del
CO115	chr2	179597826	A	-	.	59	80	frameshift deletion	TTN	MSI	NM_133378:c.12345delT:p.F4115fs
CO115	chr2	179605965	T	C	.	55	40	nonsynonymous SNV	TTN	MSI	NM_003319:c.A10906G:p.N3636D
CO115	chr2	179615481	A	G	.	83	62	synonymous SNV	TTN	MSI	NM_133379:c.T11646C:p.S3882S
CO115	chr2	179621398	T	C	.	66	56	nonsynonymous SNV	TTN	MSI	NM_133437:c.A10292G:p.Q3431R
CO115	chr2	179635362	T	C	.	91	68	synonymous SNV	TTN	MSI	NM_003319:c.A8019G:p.T2673T
CO115	chr2	179643720	A	G	.	68	68	synonymous SNV	TTN	MSI	NM_003319:c.T3951C:p.T1317T
CO115	chr2	203420130	A	-	.	0	157	frameshift deletion	BMPR2	MSI	NM_001204:c.1742delA:p.E581fs
CO115	chr2	209192988	G	A	.	45	44	nonsynonymous SNV	PIKFYVE	MSI	NM_015040:c.G3703A:p.A1235T
CO115	chr2	212537890	G	A	.	44	26	nonsynonymous SNV	ERBB4	MSI	NM_001042599:c.C1715T:p.P572L
CO115	chr2	220327074	C	T	.	15	11	nonsynonymous SNV	SPEG	MSI	NM_001173476:c.C124T:p.R42C
CO115	chr2	220337689	C	T	.	30	42	nonsynonymous SNV	SPEG	MSI	NM_005876:c.C4018T:p.R1340W
CO115	chr2	234368895	G	A	.	34	33	nonsynonymous SNV	DGKD	MSI	NM_003648:c.G2753A:p.R918H
CO115	chr3	30691872	A	-	rs79375991	3	134	frameshift deletion	TGFBR2	MSI	NM_003242:c.374delA:p.E125fs
CO115	chr3	38519424	A	C	.	46	23	nonsynonymous SNV	ACVR2B	MSI	NM_001106:c.A333C:p.E111D
CO115	chr3	41841752	T	C	.	86	78	nonsynonymous SNV	ULK4	MSI	NM_017886:c.A1882G:p.I628V
CO115	chr3	41860985	T	-	rs76318575	19	16	frameshift deletion	ULK4	MSI	NM_017886:c.1778delA:p.K593fs
CO115	chr3	41938348	T	G	.	51	51	nonsynonymous SNV	ULK4	MSI	NM_017886:c.A1496C:p.Q499P
CO115	chr3	43389614	T	C	.	8	13	synonymous SNV	SNRK	MSI	NM_001100594:c.T1863C:p.G621G
CO115	chr3	58395318	A	-	.	108	107	frameshift deletion	PXK	MSI	NM_001289101:c.957delA:p.R319fs
CO115	chr3	124053236	A	G	.	11	11	nonsynonymous SNV	KALRN	MSI	NM_001024660:c.A1535G:p.H512R
CO115	chr3	130400366	G	A	.	60	33	nonsynonymous SNV	PIK3R4	MSI	NM_014602:c.C3677T:p.A1226V
CO115	chr3	134825422	A	G	.	42	34	nonsynonymous SNV	EPHB1	MSI	NM_004441:c.A938G:p.D313G
CO115	chr3	142274740	T	-	.	69	83	frameshift deletion	ATR	MSI	NM_001184:c.2320delA:p.I774fs
CO115	chr3	142281514	T	-	.	73	90	frameshift deletion	ATR	MSI	NM_001184:c.730delA:p.I244fs
CO115	chr3	196529962	G	T	.	76	85	nonsynonymous SNV	PAK2	MSI	NM_002577:c.G363T:p.Q121H
CO115	chr4	3009519	-	T	.	85	99	frameshift insertion	GRK4	MSI	NM_001004056:c.404_405insT:p.Y135fs
CO115	chr4	55156527	T	G	.	40	64	synonymous SNV	PDGFRA	MSI	NM_006206:c.T2928G:p.A976A
CO115	chr4	66356273	A	G	.	75	67	synonymous SNV	EPHA5	MSI	NM_001281765:c.T1224C:p.C408C
CO115	chr4	87080486	T	A	.	136	122	synonymous SNV	MAPK10	MSI	NM_002753:c.A201T:p.L67L
CO115	chr4	107156505	T	-	.	78	84	frameshift deletion	TBCK	MSI	NM_033115:c.1181delA:p.N394fs
CO115	chr5	1280369	C	T	.	84	62	synonymous SNV	TERT	MSI	NM_001193376:c.G1854A:p.T618T
CO115	chr5	14359492	C	-	.	52	45	frameshift deletion	TRIO	MSI	NM_007118:c.2243delC:p.T748fs
CO115	chr5	14461268	C	T	.	11	10	nonsynonymous SNV	TRIO	MSI	NM_007118:c.C5344T:p.R1782W
CO115	chr5	56155650	C	T	.	45	48	stopgain SNV	MAP3K1	MSI	NM_005921:c.C742T:p.R248X
CO115	chr5	56178453	A	G	.	72	52	synonymous SNV	MAP3K1	MSI	NM_005921:c.A3426G:p.S1142S
CO115	chr5	66429402	A	G	.	69	68	synonymous SNV	MAST4	MSI	NM_001290226:c.A1536G:p.G512G
CO115	chr5	66462455	C	A	.	40	47	nonsynonymous SNV	MAST4	MSI	NM_001290227:c.C6665A:p.S2222Y
CO115	chr5	66462752	T	-	.	74	83	frameshift deletion	MAST4	MSI	NM_001290227:c.6962delT:p.V2321fs
CO115	chr5	67522699	-	T	.	45	55	frameshift insertion	PIK3R1	MSI	NM_181523:c.196_197insT:p.R66fs
CO115	chr5	112164664	A	-	.	46	36	frameshift deletion	APC	MSI	NM_001127511:c.1684delA:p.K562fs
CO115	chr5	112174677	T	C	rs143638171	65	61	nonsynonymous SNV	APC	MSI	NM_001127511:c.T3332C:p.L1111S
CO115	chr5	112175951	-	A	.	55	55	frameshift insertion	APC	MSI	NM_001127511:c.4606_4607insA:p.E1536fs
CO115	chr5	112770148	A	G	.	22	24	nonsynonymous SNV	TSSK1B	MSI	NM_032028:c.T389C:p.L130P
CO115	chr5	133634349	A	-	.	92	100	frameshift deletion	CDKL3	MSI	NM_001113575:c.1772delT:p.F591fs
CO115	chr5	146657736	T	G	.	108	101	nonsynonymous SNV	STK32A	MSI	NM_001112724:c.T102G:p.F34L
CO115	chr5	149511556	T	C	.	184	53	nonsynonymous SNV	PDGFRB	MSI	NM_002609:c.A1229G:p.Q410R
CO115	chr5	156635993	T	C	.	116	127	nonsynonymous SNV	ITK	MSI	NM_005546:c.T232C:p.Y78H
CO115	chr5	176520482	C	T	.	86	105	nonsynonymous SNV	FGFR4	MSI	NM_022963:c.C1207T:p.P403S
CO115	chr5	176860626	C	A	.	84	30	synonymous SNV	GRK6	MSI	NM_001004105:c.C687A:p.A229A
CO115	chr6	7404653	C	A	.	35	40	nonsynonymous SNV	RIOK1	MSI	NM_153005:c.C134A:p.P45H
CO115	chr6	44228011	G	T	.	36	29	synonymous SNV	NFKBIE	MSI	NM_004556:c.C1206A:p.T402T
CO115	chr6	80751897	A	-	.	74	60	frameshift deletion	TTK	MSI	NM_001166691:c.2549delA:p.E850fs
CO115	chr6	117710947	C	T	.	67	62	nonsynonymous SNV	ROS1	MSI	NM_002944:c.G1325A:p.R442Q
CO115	chr6	136888843	AGT	-	.	52	43	nonframeshift deletion	MAP3K5	MSI	NM_005923:c.3685_3687del:p.1229_1229del
CO115	chr6	137113024	G	A	.	22	41	nonsynonymous SNV	MAP3K5	MSI	NM_005923:c.C272T:p.T91I
CO115	chr6	137113025	T	C	.	40	21	nonsynonymous SNV	MAP3K5	MSI	NM_005923:c.A271G:p.T91A
CO115	chr6	152415653	C	G	.	81	83	nonsynonymous SNV	ESR1	MSI	NM_000125:c.C1503G:p.H501Q
CO115	chr6	166912089	G	T	.	17	17	synonymous SNV	RPS6KA2	MSI	NM_021135:c.C654A:p.S218S
CO115	chr7	6085740	T	-	.	91	109	frameshift deletion	EIF2AK1	MSI	NM_001134335:c.592delA:p.I198fs
CO115	chr7	98503815	T	C	.	27	15	nonsynonymous SNV	TRRAP	MSI	NM_001244580:c.T1052C:p.M351T
CO115	chr7	98519395	G	A	.	42	24	nonsynonymous SNV	TRRAP	MSI	NM_001244580:c.G2642A:p.R881H
CO115	chr7	98545875	T	-	.	88	84	frameshift deletion	TRRAP	MSI	NM_003496:c.4505delT:p.L1502fs
CO115	chr7	98592304	C	T	.	102	99	nonsynonymous SNV	TRRAP	MSI	NM_003496:c.C10013T:p.T3338I
CO115	chr7	100417764	G	-	.	17	13	frameshift deletion	EPHB4	MSI	NM_004444:c.963delC:p.T321fs
CO115	chr7	137374687	C	T	.	96	94	nonsynonymous SNV	DGKI	MSI	NM_004717:c.G463A:p.V155M
CO115	chr7	139268705	A	G	.	162	114	synonymous SNV	HIPK2	MSI	NM_001113239:c.T2742C:p.R914R
CO115	chr7	140453136	A	T	rs113488022	37	42	nonsynonymous SNV	BRAF	MSI	NM_004333:c.T1799A:p.V600E
CO115	chr7	142566473	C	-	.	20	30	frameshift deletion	EPHB6	MSI	NM_001280795:c.1386delC:p.G462fs
CO115	chr7	142566857	G	A	.	69	60	nonsynonymous SNV	EPHB6	MSI	NM_001280795:c.G1538A:p.S513N
CO115	chr7	150776004	G	A	.	49	41	stopgain SNV	FASTK	MSI	NM_033015:c.C187T:p.Q63X
CO115	chr8	27297754	C	T	.	0	52	nonsynonymous SNV	PTK2B	MSI	NM_173175:c.C1835T:p.A612V
CO115	chr8	38314998	T	C	.	46	45	synonymous SNV	FGFR1	MSI	NM_001174067:c.A66G:p.G22G
CO115	chr8	57026488	C	T	.	15	14	synonymous SNV	MOS	MSI	NM_005372:c.G54A:p.S18S
CO115	chr8	126445610	C	T	.	141	79	nonsynonymous SNV	TRIB1	MSI	NM_025195:c.C412T:p.P138S
CO115	chr8	144918006	T	C	.	74	14	nonsynonymous SNV	NRBP2	MSI	NM_178564:c.A1421G:p.Y474C
CO115	chr8	145615889	G	A	.	105	47	synonymous SNV	ADCK5	MSI	NM_174922:c.G285A:p.L95L
CO115	chr9	36583705	T	C	.	80	92	nonsynonymous SNV	MELK	MSI	NM_001256685:c.T140C:p.L47P
CO115	chr9	90321802	G	-	.	27	33	frameshift deletion	DAPK1	MSI	NM_001288729:c.3816delG:p.M1272fs
CO115	chr9	95410367	G	A	.	91	96	stopgain SNV	IPPK	MSI	NM_022755:c.C478T:p.R160X
CO115	chr9	101895001	C	T	.	117	108	nonsynonymous SNV	TGFBR1	MSI	NM_004612:c.C554T:p.T185I
CO115	chr9	113449546	T	C	.	64	55	nonsynonymous SNV	MUSK	MSI	NM_001166280:c.T356C:p.M119T
CO115	chr9	130550839	C	-	.	19	17	frameshift deletion	CDK9	MSI	NM_001261:c.621delC:p.G207fs
CO115	chr9	131467627	C	A	.	67	67	nonsynonymous SNV	PKN3	MSI	NM_013355:c.C70A:p.R24S
CO115	chr9	133748333	C	T	.	36	22	nonsynonymous SNV	ABL1	MSI	NM_005157:c.C994T:p.R332W
CO115	chr9	133760024	C	-	.	36	31	frameshift deletion	ABL1	MSI	NM_005157:c.2347delC:p.P783fs
CO115	chr9	136918528	-	G	.	39	19	frameshift insertion	BRD3	MSI	NM_007371:c.72_73insC:p.P24fs
CO115	chr10	12803037	C	T	.	100	95	synonymous SNV	CAMK1D	MSI	NM_020397:c.C390T:p.D130D
CO115	chr10	89692981	-	G	.	43	41	frameshift insertion	PTEN	MSI	NM_000314:c.465_466insG:p.Y155fs
CO115	chr10	89717672	C	T	rs121909219	49	43	stopgain SNV	PTEN	MSI	NM_000314:c.C697T:p.R233X
CO115	chr10	121182770	C	T	.	56	55	synonymous SNV	GRK5	MSI	NM_005308:c.C432T:p.A144A
CO115	chr10	123239429	A	G	.	103	22	nonsynonymous SNV	FGFR2	MSI	NM_001144914:c.T2072C:p.M691T
CO115	chr11	532651	C	T	.	56	47	synonymous SNV	HRAS	MSI	NM_001130442:c.G555A:p.K185K
CO115	chr11	532733	G	A	.	102	105	nonsynonymous SNV	HRAS	MSI	NM_001130442:c.C473T:p.T158M
CO115	chr11	1466683	C	A	.	58	47	synonymous SNV	BRSK2	MSI	NM_001256627:c.C972A:p.S324S
CO115	chr11	6629392	C	-	.	61	61	frameshift deletion	ILK	MSI	NM_001014795:c.206delC:p.T69fs
CO115	chr11	8457663	A	-	.	76	57	frameshift deletion	STK33	MSI	NM_001289059:c.410delT:p.L137fs
CO115	chr11	46395974	C	T	.	100	115	synonymous SNV	DGKZ	MSI	NM_001199268:c.C1362T:p.S454S
CO115	chr11	64606335	C	T	.	22	19	nonsynonymous SNV	CDC42BPG	MSI	NM_017525:c.G916A:p.A306T
CO115	chr11	65373243	G	-	.	109	78	frameshift deletion	MAP3K11	MSI	NM_002419:c.1820delC:p.P607fs
CO115	chr11	67200833	G	A	.	20	24	nonsynonymous SNV	RPS6KB2	MSI	NM_003952:c.G821A:p.R274Q
CO115	chr11	111591484	A	G	.	110	80	nonsynonymous SNV	SIK2	MSI	NM_015191:c.A1778G:p.Q593R
CO115	chr11	111591744	G	A	.	60	66	synonymous SNV	SIK2	MSI	NM_015191:c.G1902A:p.P634P
CO115	chr11	113264322	C	T	.	49	44	nonsynonymous SNV	ANKK1	MSI	NM_178510:c.C305T:p.A102V
CO115	chr11	113673924	C	-	.	35	40	frameshift deletion	USP28	MSI	NM_020886:c.2818delG:p.V940fs
CO115	chr12	1017046	T	C	.	21	22	nonsynonymous SNV	WNK1	MSI	NM_014823:c.T5933C:p.V1978A
CO115	chr12	40671946	A	-	.	63	57	frameshift deletion	LRRK2	MSI	NM_198578:c.2124delA:p.L708fs
CO115	chr12	53876830	T	C	.	51	68	nonsynonymous SNV	MAP3K12	MSI	NM_001193511:c.A1757G:p.K586R
CO115	chr12	56347514	C	-	.	30	18	frameshift deletion	DGKA	MSI	NM_001345:c.2170delC:p.P724fs
CO115	chr12	64858134	A	G	.	102	67	synonymous SNV	TBK1	MSI	NM_013254:c.A249G:p.V83V
CO115	chr12	66620611	G	A	.	55	31	synonymous SNV	IRAK3	MSI	NM_001142523:c.G579A:p.Q193Q
CO115	chr12	117914325	G	-	.	115	128	frameshift deletion	KSR2	MSI	NM_173598:c.2439delC:p.P813fs
CO115	chr12	118293278	G	A	.	47	57	nonsynonymous SNV	KSR2	MSI	NM_173598:c.C340T:p.R114C
CO115	chr12	121678328	TTTT	-	.	0	84	frameshift deletion	CAMKK2	MSI	NM_001270486:c.1611_1614del:p.537_538del
CO115	chr12	132397801	T	C	.	30	25	synonymous SNV	ULK1	MSI	NM_003565:c.T1155C:p.S385S
CO115	chr12	132403858	G	-	.	65	65	frameshift deletion	ULK1	MSI	NM_003565:c.2613delG:p.A871fs
CO115	chr13	32906957	C	T	rs80358422	56	74	nonsynonymous SNV	BRCA2	MSI	NM_000059:c.C1342T:p.R448C
CO115	chr13	32914623	G	A	.	76	104	nonsynonymous SNV	BRCA2	MSI	NM_000059:c.G6131A:p.G2044D
CO115	chr13	32972385	A	G	.	109	92	synonymous SNV	BRCA2	MSI	NM_000059:c.A9735G:p.S3245S
CO115	chr13	36385101	T	C	.	45	37	nonsynonymous SNV	DCLK1	MSI	NM_001195415:c.A638G:p.Y213C
CO115	chr13	36428697	G	A	.	151	122	nonsynonymous SNV	DCLK1	MSI	NM_001195415:c.C53T:p.P18L
CO115	chr13	37678451	G	A	.	93	91	stopgain SNV	CSNK1A1L	MSI	NM_145203:c.C943T:p.Q315X
CO115	chr13	42729863	G	A	.	73	54	nonsynonymous SNV	DGKH	MSI	NM_001204505:c.G142A:p.A48T
CO115	chr13	42769036	G	A	.	169	112	nonsynonymous SNV	DGKH	MSI	NM_001297429:c.G1316A:p.R439Q
CO115	chr13	110435816	G	T	.	34	13	nonsynonymous SNV	IRS2	MSI	NM_003749:c.C2585A:p.P862H
CO115	chr14	24808264	A	G	.	35	41	nonsynonymous SNV	RIPK3	MSI	NM_006871:c.T428C:p.L143P
CO115	chr14	71197193	C	A	.	44	29	nonsynonymous SNV	MAP3K9	MSI	NM_001284232:c.G2418T:p.E806D
CO115	chr15	40268998	-	GACGAC	.	64	55	nonframeshift insertion	EIF2AK4	MSI	NM_001013703:c.2202_2203insGACGAC:p.E734delinsEDD
CO115	chr15	40326541	A	G	.	78	55	synonymous SNV	EIF2AK4	MSI	NM_001013703:c.A4788G:p.E1596E
CO115	chr15	40475962	AAG	-	.	154	128	nonframeshift deletion	BUB1B	MSI	NM_001211:c.629_631del:p.210_211del
CO115	chr15	40564613	G	A	.	21	22	synonymous SNV	PAK6	MSI	NM_001276717:c.G1047A:p.A349A
CO115	chr15	41865510	G	A	.	51	50	nonsynonymous SNV	TYRO3	MSI	NM_006293:c.G1990A:p.A664T
CO115	chr15	43122271	C	T	.	58	46	synonymous SNV	TTBK2	MSI	NM_173500:c.G297A:p.R99R
CO115	chr15	50853891	A	G	.	49	42	nonsynonymous SNV	TRPM7	MSI	NM_017672:c.T5582C:p.V1861A
CO115	chr15	50935644	A	G	.	109	87	nonsynonymous SNV	TRPM7	MSI	NM_017672:c.T428C:p.M143T
CO115	chr15	75091674	G	T	.	19	19	nonsynonymous SNV	CSK	MSI	NM_004383:c.G304T:p.G102C
CO115	chr15	85370722	T	G	.	83	84	nonsynonymous SNV	ALPK3	MSI	NM_020778:c.T796G:p.F266V
CO115	chr15	85400191	T	C	.	60	69	nonsynonymous SNV	ALPK3	MSI	NM_020778:c.T2828C:p.L943P
CO115	chr15	88669564	A	G	.	26	26	nonsynonymous SNV	NTRK3	MSI	NM_001243101:c.T1310C:p.L437P
CO115	chr15	91436886	A	T	.	42	45	nonsynonymous SNV	FES	MSI	NM_001143783:c.A1874T:p.D625V
CO115	chr16	18859191	A	G	.	93	79	nonsynonymous SNV	SMG1	MSI	NM_015092:c.T5788C:p.Y1930H
CO115	chr16	28330452	G	T	.	60	58	nonsynonymous SNV	SBK1	MSI	NM_001024401:c.G363T:p.E121D
CO115	chr16	30128561	T	C	.	69	46	nonsynonymous SNV	MAPK3	MSI	NM_001040056:c.A821G:p.N274S
CO115	chr16	30768017	C	-	.	56	28	frameshift deletion	PHKG2	MSI	NM_000294:c.908delC:p.T303fs
CO115	chr16	31123285	G	A	.	68	68	nonsynonymous SNV	BCKDK	MSI	NM_001271926:c.G941A:p.R314Q
CO115	chr16	68853303	A	C	.	34	36	synonymous SNV	CDH1	MSI	NM_004360:c.A1686C:p.T562T
CO115	chr17	4789254	-	C	.	67	73	frameshift insertion	MINK1	MSI	NM_001024937:c.688_689insC:p.A230fs
CO115	chr17	4795528	A	G	.	40	12	nonsynonymous SNV	MINK1	MSI	NM_001024937:c.A2026G:p.R676G
CO115	chr17	7796827	C	-	.	24	45	frameshift deletion	CHD3	MSI	NM_001005271:c.910delC:p.P304fs
CO115	chr17	8733054	G	T	.	20	13	unknown	PIK3R6	MSI	UNKNOWN
CO115	chr17	19750085	C	A	.	84	90	nonsynonymous SNV	ULK2	MSI	NM_001142610:c.G434T:p.R145I
CO115	chr17	19750115	T	C	.	90	85	nonsynonymous SNV	ULK2	MSI	NM_001142610:c.A404G:p.Q135R
CO115	chr17	25910015	-	C	.	5	84	frameshift insertion	KSR1	MSI	NM_014238:c.453_454insC:p.T151fs
CO115	chr17	26449740	T	-	.	92	76	frameshift deletion	NLK	MSI	NM_016231:c.570delT:p.C190fs
CO115	chr17	27064868	C	A	.	44	47	synonymous SNV	NEK8	MSI	NM_178170:c.C921A:p.I307I
CO115	chr17	38457247	A	G	.	122	100	nonsynonymous SNV	CDC6	MSI	NM_001254:c.A1417G:p.R473G
CO115	chr17	40939870	G	-	.	69	72	frameshift deletion	WNK4	MSI	NM_032387:c.1816delG:p.G606fs
CO115	chr17	41244177	A	T	.	95	102	nonsynonymous SNV	BRCA1	MSI	NM_007297:c.T3230A:p.F1077Y
CO115	chr17	41256924	T	C	.	103	88	nonsynonymous SNV	BRCA1	MSI	NM_007297:c.A121G:p.K41E
CO115	chr17	48265492	C	T	rs67394386	17	13	nonsynonymous SNV	COL1A1	MSI	NM_000088:c.G3226A:p.G1076S
CO115	chr17	54926177	C	T	.	76	87	stopgain SNV	DGKE	MSI	NM_003647:c.C1009T:p.R337X
CO115	chr17	61770979	G	A	.	81	82	nonsynonymous SNV	MAP3K3	MSI	NM_002401:c.G1723A:p.A575T
CO115	chr17	64684464	T	A	.	113	123	nonsynonymous SNV	PRKCA	MSI	NM_002737:c.T731A:p.I244N
CO115	chr17	73997993	T	C	.	19	10	nonsynonymous SNV	CDK3	MSI	NM_001258:c.T155C:p.I52T
CO115	chr17	74382038	C	T	.	26	23	nonsynonymous SNV	SPHK1	MSI	NM_021972:c.C25T:p.R9C
CO115	chr17	79094053	T	C	.	67	76	nonsynonymous SNV	AATK	MSI	NM_004920:c.A3374G:p.K1125R
CO115	chr17	79096434	C	T	.	5	12	nonsynonymous SNV	AATK	MSI	NM_004920:c.G993A:p.M331I
CO115	chr18	18533679	T	-	.	47	60	frameshift deletion	ROCK1	MSI	NM_005406:c.3921delA:p.K1307fs
CO115	chr19	3960100	C	T	.	56	70	nonsynonymous SNV	DAPK3	MSI	NM_001348:c.G785A:p.R262Q
CO115	chr19	12980099	A	G	.	25	12	nonsynonymous SNV	MAST1	MSI	NM_014975:c.A2993G:p.H998R
CO115	chr19	12984741	G	A	.	46	45	nonsynonymous SNV	MAST1	MSI	NM_014975:c.G3770A:p.R1257H
CO115	chr19	15350211	G	A	.	126	110	nonsynonymous SNV	BRD4	MSI	NM_058243:c.C3568T:p.P1190S
CO115	chr19	39663814	C	T	.	6	12	nonsynonymous SNV	PAK4	MSI	NM_001014832:c.C461T:p.A154V
CO115	chr19	46282609	G	A	.	28	25	synonymous SNV	DMPK	MSI	NM_001288765:c.C78T:p.C26C
CO115	chr19	47217252	C	T	.	17	43	nonsynonymous SNV	PRKD2	MSI	NM_016457:c.G247A:p.E83K
CO115	chr19	55815035	-	C	.	27	19	frameshift insertion	BRSK1	MSI	NM_032430:c.1127_1128insC:p.D376fs
CO115	chr19	57744019	G	A	.	19	11	nonsynonymous SNV	AURKC	MSI	NM_001015878:c.G406A:p.E136K
CO115	chr20	30409293	C	A	.	26	34	synonymous SNV	MYLK2	MSI	NM_033118:c.C525A:p.T175T
CO115	chr21	43161065	A	G	.	11	11	nonsynonymous SNV	RIPK4	MSI	NM_020639:c.T2288C:p.L763P
CO115	chr21	43162037	G	A	.	59	70	nonsynonymous SNV	RIPK4	MSI	NM_020639:c.C1316T:p.A439V
CO115	chr21	44845288	T	C	.	52	46	nonsynonymous SNV	SIK1	MSI	NM_173354:c.A272G:p.Q91R
CO115	chr22	19119099	A	G	.	98	103	nonsynonymous SNV	TSSK2	MSI	NM_053006:c.A187G:p.I63V
CO115	chr22	19119732	C	-	.	37	29	frameshift deletion	TSSK2	MSI	NM_053006:c.820delC:p.P274fs
CO115	chr22	47086002	C	-	.	119	77	frameshift deletion	CERK	MSI	NM_022766:c.1428delG:p.G476fs
CO115	chr22	50356764	G	A	.	28	21	nonsynonymous SNV	PIM3	MSI	NM_001001852:c.G970A:p.E324K
CO115	chrX	41485857	C	A	.	0	62	stopgain SNV	CASK	MSI	NM_001126054:c.G1015T:p.G339X
CO115	chrX	107979040	T	C	.	64	19	nonsynonymous SNV	IRS4	MSI	NM_003604:c.A535G:p.M179V
CO115	chrX	108631841	T	A	.	1	106	nonsynonymous SNV	GUCY2F	MSI	NM_001522:c.A2833T:p.N945Y
CO115	chrX	110463604	G	A	.	39	21	nonsynonymous SNV	PAK3	MSI	NM_001128167:c.G1564A:p.A522T
CO115	chrX	153279549	GGCCCA	-	.	0	27	nonframeshift deletion	IRAK1	MSI	NM_001025242:c.1478_1483del:p.493_495del
COLO205	chr1	2087523	G	A	rs372545033	42	105	synonymous SNV	PRKCZ	MSS	NM_001033581:c.G417A:p.T139T
COLO205	chr1	11270947	G	A	.	196	72	nonsynonymous SNV	MTOR	MSS	NM_004958:c.C3578T:p.P1193L
COLO205	chr1	22915689	G	A	.	108	37	synonymous SNV	EPHA8	MSS	NM_001006943:c.G1305A:p.T435T
COLO205	chr1	32740628	C	T	.	97	51	synonymous SNV	LCK	MSS	NM_001042771:c.C222T:p.P74P
COLO205	chr1	182555149	C	A	rs74315364	182	71	stopgain SNV	RNASEL	MSS	NM_021133:c.G793T:p.E265X
COLO205	chr2	179655446	T	A	.	58	112	nonsynonymous SNV	TTN	MSS	NM_001256850:c.A1789T:p.S597C
COLO205	chr3	97194301	G	C	.	102	31	nonsynonymous SNV	EPHA6	MSS	NM_001278300:c.G176C:p.G59A
COLO205	chr3	170819419	G	A	.	98	49	synonymous SNV	TNIK	MSS	NM_001161566:c.C2134T:p.L712L
COLO205	chr4	151000266	C	T	.	93	37	synonymous SNV	DCLK2	MSS	NM_001040260:c.C87T:p.S29S
COLO205	chr5	56168655	C	T	.	101	73	synonymous SNV	MAP3K1	MSS	NM_005921:c.C1509T:p.H503H
COLO205	chr5	112175951	-	A	.	2	106	frameshift insertion	APC	MSS	NM_001127511:c.4606_4607insA:p.E1536fs
COLO205	chr7	116340135	A	T	.	115	55	nonsynonymous SNV	MET	MSS	NM_000245:c.A997T:p.I333L
COLO205	chr7	140453136	A	T	rs113488022	37	46	nonsynonymous SNV	BRAF	MSS	NM_004333:c.T1799A:p.V600E
COLO205	chr8	145617878	G	A	.	52	59	nonsynonymous SNV	ADCK5	MSS	NM_174922:c.G1486A:p.A496T
COLO205	chr9	90255748	C	T	.	237	86	nonsynonymous SNV	DAPK1	MSS	NM_001288729:c.C814T:p.H272Y
COLO205	chr9	90263726	C	T	.	45	82	nonsynonymous SNV	DAPK1	MSS	NM_001288729:c.C1360T:p.R454C
COLO205	chr9	90321173	C	T	.	26	83	nonsynonymous SNV	DAPK1	MSS	NM_001288729:c.C3187T:p.R1063C
COLO205	chr12	40697796	G	A	.	59	113	nonsynonymous SNV	LRRK2	MSS	NM_198578:c.G3637A:p.G1213S
COLO205	chr12	40707950	C	T	.	161	77	synonymous SNV	LRRK2	MSS	NM_198578:c.C4713T:p.H1571H
COLO205	chr13	29005423	G	A	.	258	65	stopgain SNV	FLT1	MSS	NM_001159920:c.C838T:p.R280X
COLO205	chr16	23701375	G	T	.	18	29	nonsynonymous SNV	PLK1	MSS	NM_005030:c.G1803T:p.K601N
COLO205	chr17	7579354	CAGACGGAAACCG	-	.	0	53	frameshift deletion	TP53	MSS	NM_000546:c.321_333del:p.107_111del
COLO205	chr17	7579369	GCTGCCCTGGT	-	.	0	55	frameshift deletion	TP53	MSS	NM_000546:c.308_318del:p.103_106del
COLO205	chr19	41743932	-	C	.	98	53	frameshift insertion	AXL	MSS	NM_001278599:c.63_64insC:p.V21fs
COLO320	chr1	65305453	C	A	.	49	25	nonsynonymous SNV	JAK1	MSS	NM_002227:c.G2675T:p.C892F
COLO320	chr1	155264415	C	T	.	85	37	nonsynonymous SNV	PKLR	MSS	NM_000298:c.G823A:p.G275R
COLO320	chr1	227300437	G	A	.	88	86	synonymous SNV	CDC42BPA	MSS	NM_003607:c.C1825T:p.L609L
COLO320	chr1	243858971	C	T	.	97	81	nonsynonymous SNV	AKT3	MSS	NM_005465:c.G94A:p.D32N
COLO320	chr2	179613743	C	A	.	74	97	stopgain SNV	TTN	MSS	NM_133379:c.G13384T:p.E4462X
COLO320	chr3	9801218	G	A	.	53	55	nonsynonymous SNV	CAMK1	MSS	NM_003656:c.C866T:p.S289L
COLO320	chr4	845757	G	A	.	19	16	nonsynonymous SNV	GAK	MSS	NM_001286833:c.C2995T:p.P999S
COLO320	chr5	112173723	C	G	.	0	220	stopgain SNV	APC	MSS	NM_001127511:c.C2378G:p.S793X
COLO320	chr5	149503900	G	T	.	89	92	nonsynonymous SNV	PDGFRB	MSS	NM_002609:c.C1936A:p.Q646K
COLO320	chr5	149652681	G	T	.	21	27	nonsynonymous SNV	CAMK2A	MSS	NM_015981:c.C104A:p.A35D
COLO320	chr7	100403144	A	-	.	132	27	frameshift deletion	EPHB4	MSS	NM_004444:c.2657delT:p.I886fs
COLO320	chr7	100403147	T	C	.	129	28	nonsynonymous SNV	EPHB4	MSS	NM_004444:c.A2654G:p.K885R
COLO320	chr7	100403155	G	-	.	133	32	frameshift deletion	EPHB4	MSS	NM_004444:c.2646delC:p.A882fs
COLO320	chr7	116435728	T	A	.	101	61	nonsynonymous SNV	MET	MSS	NM_000245:c.T3818A:p.L1273H
COLO320	chr7	137237311	C	A	.	36	85	nonsynonymous SNV	DGKI	MSS	NM_004717:c.G1951T:p.A651S
COLO320	chr7	150754175	A	C	.	69	108	nonsynonymous SNV	CDK5	MSS	NM_001164410:c.T110G:p.L37R
COLO320	chr9	96061474	G	T	.	19	27	nonsynonymous SNV	WNK2	MSS	NM_006648:c.G6046T:p.V2016F
COLO320	chr13	32913782	T	A	.	88	58	nonsynonymous SNV	BRCA2	MSS	NM_000059:c.T5290A:p.S1764T
COLO320	chr13	52639658	A	G	.	0	49	nonsynonymous SNV	NEK5	MSS	NM_199289:c.T2012C:p.V671A
COLO320	chr16	46782043	G	T	.	169	80	stopgain SNV	MYLK3	MSS	NM_182493:c.C63A:p.C21X
COLO320	chr17	3628906	G	T	.	41	47	synonymous SNV	GSG2	MSS	NM_031965:c.G1677T:p.L559L
COLO320	chr17	7577539	G	A	rs121912651	0	106	nonsynonymous SNV	TP53	MSS	NM_000546:c.C742T:p.R248W
COLO320	chr17	8725220	C	T	.	64	58	unknown	PIK3R6	MSS	UNKNOWN
COLO320	chr17	29556057	T	C	.	28	28	synonymous SNV	NF1	MSS	NM_000267:c.T2424C:p.L808L
COLO320	chr17	64684473	G	T	.	191	129	nonsynonymous SNV	PRKCA	MSS	NM_002737:c.G740T:p.W247L
DLD1	chr1	2105455	G	T	.	161	152	nonsynonymous SNV	PRKCZ	MSI	NM_001033581:c.G856T:p.V286L
DLD1	chr1	9782145	C	T	.	73	82	nonsynonymous SNV	PIK3CD	MSI	NM_005026:c.C2168T:p.A723V
DLD1	chr1	11272939	G	A	.	221	223	synonymous SNV	MTOR	MSI	NM_004958:c.C3312T:p.G1104G
DLD1	chr1	11313967	G	A	.	137	151	nonsynonymous SNV	MTOR	MSI	NM_004958:c.C769T:p.R257W
DLD1	chr1	16458741	G	A	.	68	66	stopgain SNV	EPHA2	MSI	NM_004431:c.C2143T:p.Q715X
DLD1	chr1	16475436	T	C	.	156	146	nonsynonymous SNV	EPHA2	MSI	NM_004431:c.A260G:p.Y87C
DLD1	chr1	20964394	G	T	.	103	71	nonsynonymous SNV	PINK1	MSI	NM_032409:c.G447T:p.Q149H
DLD1	chr1	22915640	C	T	.	105	99	nonsynonymous SNV	EPHA8	MSI	NM_001006943:c.C1256T:p.S419F
DLD1	chr1	22924668	A	C	.	112	119	nonsynonymous SNV	EPHA8	MSI	NM_020526:c.A2141C:p.E714A
DLD1	chr1	22925339	C	T	.	83	98	synonymous SNV	EPHA8	MSI	NM_020526:c.C2187T:p.D729D
DLD1	chr1	23189539	C	T	.	193	178	nonsynonymous SNV	EPHB2	MSI	NM_004442:c.C821T:p.S274F
DLD1	chr1	26448467	C	T	.	150	136	nonsynonymous SNV	PDIK1L	MSI	NM_001243532:c.C425T:p.T142I
DLD1	chr1	32740382	C	A	.	32	53	synonymous SNV	LCK	MSI	NM_001042771:c.C150A:p.T50T
DLD1	chr1	32742294	C	A	.	62	71	nonsynonymous SNV	LCK	MSI	NM_001042771:c.C871A:p.L291I
DLD1	chr1	36809506	G	A	.	110	82	nonsynonymous SNV	STK40	MSI	NM_001282546:c.C974T:p.A325V
DLD1	chr1	36809514	C	T	.	139	57	synonymous SNV	STK40	MSI	NM_001282546:c.G966A:p.Q322Q
DLD1	chr1	38189042	G	T	.	43	52	nonsynonymous SNV	EPHA10	MSI	NM_001099439:c.C1775A:p.P592H
DLD1	chr1	38227575	C	T	.	103	124	nonsynonymous SNV	EPHA10	MSI	NM_001099439:c.G352A:p.A118T
DLD1	chr1	43770762	T	C	.	85	95	nonsynonymous SNV	TIE1	MSI	NM_001253357:c.T164C:p.V55A
DLD1	chr1	43774777	G	A	.	46	61	nonsynonymous SNV	TIE1	MSI	NM_001253357:c.G1028A:p.R343H
DLD1	chr1	44878377	A	T	.	116	105	nonsynonymous SNV	RNF220	MSI	NM_018150:c.A608T:p.E203V
DLD1	chr1	45101238	G	A	.	36	60	nonsynonymous SNV	RNF220	MSI	NM_018150:c.G971A:p.R324Q
DLD1	chr1	46487679	G	A	.	126	113	nonsynonymous SNV	MAST2	MSI	NM_015112:c.G1348A:p.E450K
DLD1	chr1	46498035	A	G	.	51	39	nonsynonymous SNV	MAST2	MSI	NM_015112:c.A3373G:p.M1125V
DLD1	chr1	57169805	A	G	.	169	174	nonsynonymous SNV	PRKAA2	MSI	NM_006252:c.A950G:p.Q317R
DLD1	chr1	64644333	G	T	.	61	90	nonsynonymous SNV	ROR1	MSI	NM_005012:c.G2609T:p.S870I
DLD1	chr1	89251864	T	C	.	63	46	nonsynonymous SNV	PKN2	MSI	NM_006256:c.T1249C:p.W417R
DLD1	chr1	151280238	G	T	.	95	59	nonsynonymous SNV	PI4KB	MSI	NM_001198774:c.C949A:p.L317M
DLD1	chr1	153652023	G	A	.	27	28	nonsynonymous SNV	NPR1	MSI	NM_000906:c.G439A:p.G147S
DLD1	chr1	153659506	T	C	.	101	100	synonymous SNV	NPR1	MSI	NM_000906:c.T1878C:p.N626N
DLD1	chr1	155233111	C	A	.	97	80	nonsynonymous SNV	CLK2	MSI	NM_001294339:c.G714T:p.K238N
DLD1	chr1	155233748	G	A	.	134	155	nonsynonymous SNV	CLK2	MSI	NM_001294339:c.C626T:p.P209L
DLD1	chr1	155263090	A	G	.	24	39	synonymous SNV	PKLR	MSI	NM_000298:c.T1314C:p.F438F
DLD1	chr1	156811221	C	T	.	43	48	synonymous SNV	INSRR	MSI	NM_014215:c.G3627A:p.G1209G
DLD1	chr1	156812991	C	A	.	44	26	nonsynonymous SNV	INSRR	MSI	NM_014215:c.G2931T:p.E977D
DLD1	chr1	156815482	C	T	.	133	86	synonymous SNV	INSRR	MSI	NM_014215:c.G2103A:p.P701P
DLD1	chr1	156823866	G	A	rs370141401	88	85	synonymous SNV	INSRR	MSI	NM_014215:c.C315T:p.R105R
DLD1	chr1	156844708	C	T	.	157	151	nonsynonymous SNV	NTRK1	MSI	NM_001012331:c.C1244T:p.A415V
DLD1	chr1	156849920	C	T	.	42	33	stopgain SNV	NTRK1	MSI	NM_001012331:c.C2158T:p.Q720X
DLD1	chr1	169824999	C	T	.	58	63	nonsynonymous SNV	SCYL3	MSI	NM_181093:c.G1412A:p.S471N
DLD1	chr1	204396853	C	T	.	122	97	nonsynonymous SNV	PIK3C2B	MSI	NM_002646:c.G4510A:p.V1504M
DLD1	chr1	204418415	G	T	.	41	36	synonymous SNV	PIK3C2B	MSI	NM_002646:c.C2244A:p.T748T
DLD1	chr1	206652393	C	T	.	70	67	nonsynonymous SNV	IKBKE	MSI	NM_001193321:c.C845T:p.A282V
DLD1	chr1	211840541	G	T	.	191	133	nonsynonymous SNV	NEK2	MSI	NM_001204182:c.C1018A:p.L340I
DLD1	chr1	211842656	C	T	.	158	123	nonsynonymous SNV	NEK2	MSI	NM_001204182:c.G784A:p.V262I
DLD1	chr1	213244375	G	A	.	219	143	nonsynonymous SNV	RPS6KC1	MSI	NM_012424:c.G133A:p.V45I
DLD1	chr1	213415019	C	A	.	78	66	nonsynonymous SNV	RPS6KC1	MSI	NM_001287220:c.C805A:p.L269I
DLD1	chr1	220805566	G	A	.	182	132	nonsynonymous SNV	MARK1	MSI	NM_001286128:c.G967A:p.A323T
DLD1	chr1	220835433	C	T	.	125	106	synonymous SNV	MARK1	MSI	NM_001286128:c.C2202T:p.R734R
DLD1	chr1	226923639	C	A	.	41	47	nonsynonymous SNV	ITPKB	MSI	NM_002221:c.G1521T:p.R507S
DLD1	chr1	226924548	G	T	.	108	112	synonymous SNV	ITPKB	MSI	NM_002221:c.C612A:p.S204S
DLD1	chr1	228400187	G	A	.	34	43	nonsynonymous SNV	OBSCN	MSI	NM_001098623:c.G703A:p.A235T
DLD1	chr1	228400309	C	T	.	158	135	synonymous SNV	OBSCN	MSI	NM_001098623:c.C825T:p.G275G
DLD1	chr1	228404311	T	C	.	98	81	nonsynonymous SNV	OBSCN	MSI	NM_001098623:c.T2285C:p.V762A
DLD1	chr1	228412343	G	T	.	113	96	nonsynonymous SNV	OBSCN	MSI	NM_001098623:c.G2837T:p.R946M
DLD1	chr1	228433342	G	T	.	111	112	nonsynonymous SNV	OBSCN	MSI	NM_001098623:c.G3710T:p.S1237I
DLD1	chr1	228462071	T	G	.	132	143	nonsynonymous SNV	OBSCN	MSI	NM_001098623:c.T5609G:p.L1870R
DLD1	chr1	228464267	G	A	.	70	61	nonsynonymous SNV	OBSCN	MSI	NM_001098623:c.G6337A:p.G2113S
DLD1	chr1	228464899	C	A	.	88	112	synonymous SNV	OBSCN	MSI	NM_001098623:c.C6639A:p.I2213I
DLD1	chr1	228471238	T	C	.	120	137	synonymous SNV	OBSCN	MSI	NM_001098623:c.T8772C:p.N2924N
DLD1	chr1	228474589	T	C	.	57	42	synonymous SNV	OBSCN	MSI	NM_001098623:c.T9393C:p.D3131D
DLD1	chr1	228482114	G	T	.	105	103	nonsynonymous SNV	OBSCN	MSI	NM_001098623:c.G11393T:p.R3798M
DLD1	chr1	228494622	C	T	.	16	22	stopgain SNV	OBSCN	MSI	NM_001098623:c.C11947T:p.R3983X
DLD1	chr1	228495111	C	T	rs377305860	104	89	synonymous SNV	OBSCN	MSI	NM_001098623:c.C12345T:p.Y4115Y
DLD1	chr1	228505283	G	T	.	146	114	nonsynonymous SNV	OBSCN	MSI	NM_001098623:c.G13680T:p.E4560D
DLD1	chr1	228509525	G	A	.	120	119	nonsynonymous SNV	OBSCN	MSI	NM_001098623:c.G14983A:p.A4995T
DLD1	chr1	228564775	C	T	.	17	18	stopgain SNV	OBSCN	MSI	NM_001098623:c.C23062T:p.Q7688X
DLD1	chr2	11332306	C	T	.	311	150	synonymous SNV	ROCK2	MSI	NM_004850:c.G4131A:p.R1377R
DLD1	chr2	12880539	T	G	.	104	44	synonymous SNV	TRIB2	MSI	NM_021643:c.T651G:p.A217A
DLD1	chr2	37506998	G	A	.	125	222	nonsynonymous SNV	PRKD3	MSI	NM_005813:c.C1063T:p.R355W
DLD1	chr2	37513372	C	A	.	107	192	nonsynonymous SNV	PRKD3	MSI	NM_005813:c.G858T:p.Q286H
DLD1	chr2	39542521	A	G	.	204	102	synonymous SNV	MAP4K3	MSI	NM_001270425:c.T927C:p.V309V
DLD1	chr2	46203574	A	G	.	39	106	nonsynonymous SNV	PRKCE	MSI	NM_005400:c.A419G:p.K140R
DLD1	chr2	88870482	A	G	.	108	125	synonymous SNV	EIF2AK3	MSI	NM_004836:c.T2895C:p.D965D
DLD1	chr2	88874389	G	T	.	153	169	nonsynonymous SNV	EIF2AK3	MSI	NM_004836:c.C2612A:p.T871N
DLD1	chr2	98341591	C	T	.	151	60	nonsynonymous SNV	ZAP70	MSI	NM_001079:c.C439T:p.P147S
DLD1	chr2	99185091	T	C	.	126	113	synonymous SNV	INPP4A	MSI	NM_001134225:c.T2478C:p.N826N
DLD1	chr2	99204046	G	A	.	126	117	nonsynonymous SNV	INPP4A	MSI	NM_001134225:c.G2894A:p.G965E
DLD1	chr2	102481473	C	G	.	52	41	nonsynonymous SNV	MAP4K4	MSI	NM_004834:c.C1693G:p.Q565E
DLD1	chr2	148683686	A	-	.	0	345	frameshift deletion	ACVR2A	MSI	NM_001278580:c.979delA:p.K327fs
DLD1	chr2	168931652	G	A	.	195	191	synonymous SNV	STK39	MSI	NM_013233:c.C1179T:p.S393S
DLD1	chr2	179395887	G	A	.	111	87	nonsynonymous SNV	TTN	MSI	NM_003319:c.C78260T:p.T26087I
DLD1	chr2	179399145	T	C	.	163	137	nonsynonymous SNV	TTN	MSI	NM_003319:c.A75002G:p.E25001G
DLD1	chr2	179399902	C	T	.	158	187	nonsynonymous SNV	TTN	MSI	NM_003319:c.G74245A:p.E24749K
DLD1	chr2	179404402	T	G	.	175	166	nonsynonymous SNV	TTN	MSI	NM_003319:c.A71195C:p.N23732T
DLD1	chr2	179407961	C	A	.	133	174	stopgain SNV	TTN	MSI	NM_003319:c.G69544T:p.E23182X
DLD1	chr2	179410716	C	A	.	129	146	nonsynonymous SNV	TTN	MSI	NM_003319:c.G68052T:p.E22684D
DLD1	chr2	179418447	C	A	.	137	150	nonsynonymous SNV	TTN	MSI	NM_003319:c.G62090T:p.G20697V
DLD1	chr2	179418650	C	A	.	76	58	nonsynonymous SNV	TTN	MSI	NM_003319:c.G61993T:p.D20665Y
DLD1	chr2	179419196	T	C	.	109	97	synonymous SNV	TTN	MSI	NM_003319:c.A61683G:p.V20561V
DLD1	chr2	179422941	T	C	.	154	148	nonsynonymous SNV	TTN	MSI	NM_003319:c.A59945G:p.K19982R
DLD1	chr2	179424053	C	T	.	147	121	nonsynonymous SNV	TTN	MSI	NM_003319:c.G59611A:p.G19871R
DLD1	chr2	179426266	C	T	.	127	108	nonsynonymous SNV	TTN	MSI	NM_003319:c.G57398A:p.S19133N
DLD1	chr2	179426714	T	C	.	139	127	nonsynonymous SNV	TTN	MSI	NM_003319:c.A56950G:p.T18984A
DLD1	chr2	179428319	C	T	.	96	107	nonsynonymous SNV	TTN	MSI	NM_003319:c.G55345A:p.V18449I
DLD1	chr2	179429379	T	C	.	111	113	synonymous SNV	TTN	MSI	NM_003319:c.A54285G:p.K18095K
DLD1	chr2	179435748	C	A	.	156	130	nonsynonymous SNV	TTN	MSI	NM_003319:c.G47916T:p.K15972N
DLD1	chr2	179436522	G	A	.	170	171	synonymous SNV	TTN	MSI	NM_003319:c.C47142T:p.C15714C
DLD1	chr2	179439753	C	T	.	148	110	synonymous SNV	TTN	MSI	NM_003319:c.G43911A:p.G14637G
DLD1	chr2	179452393	T	A	.	191	192	nonsynonymous SNV	TTN	MSI	NM_003319:c.A36448T:p.N12150Y
DLD1	chr2	179456385	T	G	.	158	188	nonsynonymous SNV	TTN	MSI	NM_003319:c.A32966C:p.N10989T
DLD1	chr2	179456869	C	T	.	77	52	nonsynonymous SNV	TTN	MSI	NM_003319:c.G32567A:p.S10856N
DLD1	chr2	179462781	T	C	.	180	174	nonsynonymous SNV	TTN	MSI	NM_003319:c.A29921G:p.K9974R
DLD1	chr2	179463355	C	A	.	124	109	nonsynonymous SNV	TTN	MSI	NM_003319:c.G29794T:p.V9932L
DLD1	chr2	179474661	T	C	.	119	112	synonymous SNV	TTN	MSI	NM_003319:c.A24294G:p.A8098A
DLD1	chr2	179476300	C	A	.	134	125	stopgain SNV	TTN	MSI	NM_003319:c.G23461T:p.G7821X
DLD1	chr2	179485663	A	T	.	125	110	nonsynonymous SNV	TTN	MSI	NM_003319:c.T18479A:p.V6160D
DLD1	chr2	179485911	C	T	.	216	124	synonymous SNV	TTN	MSI	NM_003319:c.G18339A:p.V6113V
DLD1	chr2	179494130	G	T	.	159	149	synonymous SNV	TTN	MSI	NM_003319:c.C17127A:p.T5709T
DLD1	chr2	179498321	G	A	.	95	100	synonymous SNV	TTN	MSI	NM_003319:c.C15570T:p.S5190S
DLD1	chr2	179516032	T	C	.	144	174	nonsynonymous SNV	TTN	MSI	NM_133378:c.A32261G:p.K10754R
DLD1	chr2	179576769	A	C	.	98	85	nonsynonymous SNV	TTN	MSI	NM_133378:c.T24056G:p.V8019G
DLD1	chr2	179577542	C	A	.	143	156	nonsynonymous SNV	TTN	MSI	NM_133378:c.G23478T:p.E7826D
DLD1	chr2	179584152	G	T	.	102	98	nonsynonymous SNV	TTN	MSI	NM_133378:c.C20233A:p.R6745S
DLD1	chr2	179600382	C	A	.	199	53	nonsynonymous SNV	TTN	MSI	NM_133378:c.G11059T:p.G3687W
DLD1	chr2	179605728	T	C	.	99	91	nonsynonymous SNV	TTN	MSI	NM_003319:c.A11143G:p.T3715A
DLD1	chr2	179605958	G	A	.	96	74	nonsynonymous SNV	TTN	MSI	NM_003319:c.C10913T:p.P3638L
DLD1	chr2	179610505	G	A	.	119	119	nonsynonymous SNV	TTN	MSI	NM_133379:c.C16622T:p.P5541L
DLD1	chr2	179612392	G	A	.	148	187	nonsynonymous SNV	TTN	MSI	NM_133379:c.C14735T:p.A4912V
DLD1	chr2	179614898	C	A	.	140	132	nonsynonymous SNV	TTN	MSI	NM_133379:c.G12229T:p.G4077C
DLD1	chr2	179615255	C	A	.	154	150	nonsynonymous SNV	TTN	MSI	NM_133379:c.G11872T:p.G3958C
DLD1	chr2	179629357	C	T	.	112	107	synonymous SNV	TTN	MSI	NM_003319:c.G9747A:p.T3249T
DLD1	chr2	179632574	G	A	.	142	159	nonsynonymous SNV	TTN	MSI	NM_003319:c.C9245T:p.T3082I
DLD1	chr2	179635302	C	A	.	162	137	nonsynonymous SNV	TTN	MSI	NM_003319:c.G8079T:p.Q2693H
DLD1	chr2	179640880	G	A	.	154	146	nonsynonymous SNV	TTN	MSI	NM_003319:c.C5573T:p.S1858L
DLD1	chr2	179641458	G	T	.	60	72	synonymous SNV	TTN	MSI	NM_003319:c.C4995A:p.S1665S
DLD1	chr2	201722587	T	C	.	173	119	nonsynonymous SNV	CLK1	MSI	NM_001162407:c.A812G:p.E271G
DLD1	chr2	203383554	C	T	rs137852753	48	46	stopgain SNV	BMPR2	MSI	NM_001204:c.C631T:p.R211X
DLD1	chr2	209113217	C	T	.	178	119	nonsynonymous SNV	IDH1	MSI	NM_001282386:c.G290A:p.G97D
DLD1	chr2	209165733	C	T	.	211	172	nonsynonymous SNV	PIKFYVE	MSI	NM_152671:c.C832T:p.R278C
DLD1	chr2	209165786	C	T	.	217	173	synonymous SNV	PIKFYVE	MSI	NM_152671:c.C885T:p.N295N
DLD1	chr2	212488701	A	C	.	78	70	synonymous SNV	ERBB4	MSI	NM_001042599:c.T2148G:p.T716T
DLD1	chr2	212537942	A	G	.	69	51	nonsynonymous SNV	ERBB4	MSI	NM_001042599:c.T1663C:p.C555R
DLD1	chr2	212576794	G	T	.	133	124	nonsynonymous SNV	ERBB4	MSI	NM_001042599:c.C1105A:p.L369I
DLD1	chr2	219544666	G	A	.	67	93	synonymous SNV	STK36	MSI	NM_001243313:c.G999A:p.K333K
DLD1	chr2	220316384	G	T	.	28	25	nonsynonymous SNV	SPEG	MSI	NM_005876:c.G2295T:p.E765D
DLD1	chr2	220326765	C	-	.	19	24	frameshift deletion	SPEG	MSI	NM_001173476:c.55delC:p.P19fs
DLD1	chr2	220332008	G	T	.	68	66	nonsynonymous SNV	SPEG	MSI	NM_005876:c.G2994T:p.E998D
DLD1	chr2	220348049	C	A	.	53	60	nonsynonymous SNV	SPEG	MSI	NM_005876:c.C5864A:p.T1955N
DLD1	chr2	220353844	G	A	.	131	140	nonsynonymous SNV	SPEG	MSI	NM_005876:c.G8218A:p.V2740I
DLD1	chr2	220355270	C	T	.	136	120	nonsynonymous SNV	SPEG	MSI	NM_005876:c.C9061T:p.R3021W
DLD1	chr2	234356957	G	A	.	85	122	nonsynonymous SNV	DGKD	MSI	NM_003648:c.G1418A:p.R473Q
DLD1	chr2	234359647	G	A	.	117	135	synonymous SNV	DGKD	MSI	NM_003648:c.G1986A:p.P662P
DLD1	chr2	242051697	C	T	.	193	182	nonsynonymous SNV	PASK	MSI	NM_001252119:c.G3512A:p.G1171E
DLD1	chr2	242065790	A	G	.	112	123	nonsynonymous SNV	PASK	MSI	NM_001252119:c.T2540C:p.V847A
DLD1	chr2	242066257	G	A	.	36	38	synonymous SNV	PASK	MSI	NM_001252119:c.C2073T:p.T691T
DLD1	chr3	9802445	C	T	.	47	36	nonsynonymous SNV	CAMK1	MSI	NM_003656:c.G640A:p.G214S
DLD1	chr3	12645682	C	T	.	227	168	nonsynonymous SNV	RAF1	MSI	NM_002880:c.G787A:p.V263I
DLD1	chr3	27326410	G	A	.	163	150	nonsynonymous SNV	NEK10	MSI	NM_199347:c.C1832T:p.P611L
DLD1	chr3	30691872	A	-	rs79375991	2	267	frameshift deletion	TGFBR2	MSI	NM_003242:c.374delA:p.E125fs
DLD1	chr3	30715697	T	C	.	87	82	nonsynonymous SNV	TGFBR2	MSI	NM_003242:c.T1355C:p.L452P
DLD1	chr3	36756835	A	G	.	180	51	nonsynonymous SNV	DCLK3	MSI	NM_033403:c.T1931C:p.V644A
DLD1	chr3	37045943	G	T	.	164	111	nonsynonymous SNV	MLH1	MSI	NM_000249:c.G358T:p.A120S
DLD1	chr3	38287628	T	C	.	195	206	synonymous SNV	OXSR1	MSI	NM_005109:c.T1173C:p.H391H
DLD1	chr3	41795920	C	A	.	53	61	nonsynonymous SNV	ULK4	MSI	NM_017886:c.G2254T:p.A752S
DLD1	chr3	41831302	C	T	.	97	82	nonsynonymous SNV	ULK4	MSI	NM_017886:c.G2044A:p.A682T
DLD1	chr3	48725855	C	A	.	51	41	nonsynonymous SNV	IP6K2	MSI	NM_001005909:c.G1132T:p.D378Y
DLD1	chr3	48732742	C	T	.	84	110	nonsynonymous SNV	IP6K2	MSI	NM_001190316:c.G148A:p.A50T
DLD1	chr3	49765568	C	T	.	96	87	nonsynonymous SNV	IP6K1	MSI	NM_001006115:c.G265A:p.A89T
DLD1	chr3	49897211	C	T	.	66	58	nonsynonymous SNV	CAMKV	MSI	NM_024046:c.G1046A:p.G349E
DLD1	chr3	49899506	C	T	.	48	44	nonsynonymous SNV	CAMKV	MSI	NM_024046:c.G199A:p.A67T
DLD1	chr3	49899814	A	G	.	210	197	nonsynonymous SNV	CAMKV	MSI	NM_024046:c.T8C:p.F3S
DLD1	chr3	49936038	G	T	.	69	74	synonymous SNV	MST1R	MSI	NM_001244937:c.C1632A:p.G544G
DLD1	chr3	49940490	G	T	.	83	68	nonsynonymous SNV	MST1R	MSI	NM_001244937:c.C553A:p.R185S
DLD1	chr3	52777429	G	T	.	92	81	nonsynonymous SNV	NEK4	MSI	NM_001193533:c.C1676A:p.P559H
DLD1	chr3	53212455	G	T	.	29	26	nonsynonymous SNV	PRKCD	MSI	NM_212539:c.G17T:p.R6L
DLD1	chr3	53221386	G	A	.	91	107	synonymous SNV	PRKCD	MSI	NM_212539:c.G1383A:p.L461L
DLD1	chr3	89444990	C	A	.	116	73	nonsynonymous SNV	EPHA3	MSI	NM_005233:c.C1310A:p.P437Q
DLD1	chr3	89480396	C	A	.	13	173	synonymous SNV	EPHA3	MSI	NM_005233:c.C2233A:p.R745R
DLD1	chr3	89499370	T	A	.	0	33	nonsynonymous SNV	EPHA3	MSI	NM_005233:c.T2540A:p.M847K
DLD1	chr3	96706789	A	G	.	214	176	nonsynonymous SNV	EPHA6	MSI	NM_001080448:c.A1066G:p.R356G
DLD1	chr3	97167470	C	G	.	153	135	nonsynonymous SNV	EPHA6	MSI	NM_001080448:c.C1790G:p.T597R
DLD1	chr3	97356854	A	G	.	91	85	synonymous SNV	EPHA6	MSI	NM_001278300:c.A888G:p.L296L
DLD1	chr3	119720933	A	G	.	262	84	nonsynonymous SNV	GSK3B	MSI	NM_001146156:c.T242C:p.L81P
DLD1	chr3	123366121	C	T	.	93	100	synonymous SNV	MYLK	MSI	NM_053026:c.G4362A:p.Q1454Q
DLD1	chr3	123418874	G	T	.	73	74	synonymous SNV	MYLK	MSI	NM_053026:c.C3234A:p.S1078S
DLD1	chr3	123426788	C	A	.	85	81	nonsynonymous SNV	MYLK	MSI	NM_053026:c.G1996T:p.G666C
DLD1	chr3	124385453	C	A	.	129	145	nonsynonymous SNV	KALRN	MSI	NM_007064:c.C1409A:p.P470H
DLD1	chr3	124420904	C	A	.	107	79	synonymous SNV	KALRN	MSI	NM_007064:c.C2925A:p.A975A
DLD1	chr3	130398261	G	A	.	67	62	synonymous SNV	PIK3R4	MSI	NM_014602:c.C3975T:p.P1325P
DLD1	chr3	134670743	G	A	.	65	62	synonymous SNV	EPHB1	MSI	NM_004441:c.G654A:p.L218L
DLD1	chr3	134977922	T	C	.	65	71	nonsynonymous SNV	EPHB1	MSI	NM_004441:c.T2915C:p.M972T
DLD1	chr3	138413637	C	T	.	194	170	nonsynonymous SNV	PIK3CB	MSI	NM_001256045:c.G419A:p.R140Q
DLD1	chr3	138417868	A	G	.	145	119	nonsynonymous SNV	PIK3CB	MSI	NM_001256045:c.T187C:p.C63R
DLD1	chr3	141497199	T	C	.	72	64	nonsynonymous SNV	GRK7	MSI	NM_139209:c.T73C:p.C25R
DLD1	chr3	141497587	C	T	.	39	35	nonsynonymous SNV	GRK7	MSI	NM_139209:c.C461T:p.A154V
DLD1	chr3	142217446	T	C	.	162	179	nonsynonymous SNV	ATR	MSI	NM_001184:c.A5551G:p.I1851V
DLD1	chr3	142224026	A	G	.	198	167	synonymous SNV	ATR	MSI	NM_001184:c.T5151C:p.D1717D
DLD1	chr3	142274740	T	-	.	127	105	frameshift deletion	ATR	MSI	NM_001184:c.2320delA:p.I774fs
DLD1	chr3	142274835	C	T	.	125	108	nonsynonymous SNV	ATR	MSI	NM_001184:c.G2225A:p.C742Y
DLD1	chr3	170825871	G	A	.	213	176	nonsynonymous SNV	TNIK	MSI	NM_001161565:c.C2113T:p.R705W
DLD1	chr3	170841435	C	T	.	150	141	synonymous SNV	TNIK	MSI	NM_001161565:c.G1818A:p.G606G
DLD1	chr3	170884997	G	A	.	127	117	nonsynonymous SNV	TNIK	MSI	NM_001161560:c.C836T:p.A279V
DLD1	chr3	178936091	G	A	rs104886003	129	114	nonsynonymous SNV	PIK3CA	MSI	NM_006218:c.G1633A:p.E545K
DLD1	chr3	178936103	G	A	.	125	117	nonsynonymous SNV	PIK3CA	MSI	NM_006218:c.G1645A:p.D549N
DLD1	chr3	178941904	A	G	.	199	190	synonymous SNV	PIK3CA	MSI	NM_006218:c.A2223G:p.R741R
DLD1	chr3	184295516	C	T	.	21	30	nonsynonymous SNV	EPHB3	MSI	NM_004443:c.C1550T:p.A517V
DLD1	chr3	184297722	G	A	.	22	27	synonymous SNV	EPHB3	MSI	NM_004443:c.G2172A:p.R724R
DLD1	chr3	185146604	C	T	.	93	93	stopgain SNV	MAP3K13	MSI	NM_004721:c.C235T:p.Q79X
DLD1	chr3	185200152	C	T	.	103	89	stopgain SNV	MAP3K13	MSI	NM_001242317:c.C2188T:p.Q730X
DLD1	chr3	185960319	C	T	.	27	38	synonymous SNV	DGKG	MSI	NM_001080744:c.G1725A:p.E575E
DLD1	chr3	185990049	C	T	.	140	118	nonsynonymous SNV	DGKG	MSI	NM_001080744:c.G994A:p.G332S
DLD1	chr3	195595572	-	GGTT	.	129	136	frameshift insertion	TNK2	MSI	NM_005781:c.1552_1553insAACC:p.Y518fs
DLD1	chr4	1808938	C	A	.	43	31	synonymous SNV	FGFR3	MSI	NM_022965:c.C2034A:p.A678A
DLD1	chr4	3021445	G	A	.	199	197	synonymous SNV	GRK4	MSI	NM_001004056:c.G723A:p.K241K
DLD1	chr4	5461908	T	C	.	85	79	nonsynonymous SNV	STK32B	MSI	NM_018401:c.T862C:p.W288R
DLD1	chr4	48114340	C	T	.	171	145	nonsynonymous SNV	TXK	MSI	NM_003328:c.G364A:p.A122T
DLD1	chr4	48173465	A	G	.	133	99	nonsynonymous SNV	TEC	MSI	NM_003215:c.T245C:p.V82A
DLD1	chr4	55156639	G	A	.	157	139	nonsynonymous SNV	PDGFRA	MSI	NM_006206:c.G3040A:p.A1014T
DLD1	chr4	55564516	G	A	.	39	38	nonsynonymous SNV	KIT	MSI	NM_000222:c.G404A:p.R135H
DLD1	chr4	55948757	T	C	.	164	160	synonymous SNV	KDR	MSI	NM_002253:c.A3708G:p.V1236V
DLD1	chr4	55961787	G	A	.	178	174	nonsynonymous SNV	KDR	MSI	NM_002253:c.C2774T:p.S925F
DLD1	chr4	55968164	G	A	.	126	105	synonymous SNV	KDR	MSI	NM_002253:c.C2166T:p.L722L
DLD1	chr4	66197712	G	A	.	176	151	nonsynonymous SNV	EPHA5	MSI	NM_001281766:c.C2924T:p.A975V
DLD1	chr4	66509107	C	A	.	194	168	stopgain SNV	EPHA5	MSI	NM_001281765:c.G220T:p.G74X
DLD1	chr4	82125833	A	T	.	136	113	synonymous SNV	PRKG2	MSI	NM_001282485:c.T369A:p.A123A
DLD1	chr4	87028478	T	A	.	115	139	nonsynonymous SNV	MAPK10	MSI	NM_002753:c.A264T:p.R88S
DLD1	chr4	103528891	C	T	.	41	46	nonsynonymous SNV	NFKB1	MSI	NM_001165412:c.C2207T:p.A736V
DLD1	chr4	107037381	A	G	.	231	209	nonsynonymous SNV	TBCK	MSI	NM_033115:c.T2201C:p.V734A
DLD1	chr4	107154745	T	G	.	141	97	nonsynonymous SNV	TBCK	MSI	NM_033115:c.A1323C:p.Q441H
DLD1	chr4	113298953	T	C	.	162	189	nonsynonymous SNV	ALPK1	MSI	NM_001102406:c.T20C:p.V7A
DLD1	chr4	113352506	C	T	.	74	76	synonymous SNV	ALPK1	MSI	NM_001253884:c.C1569T:p.H523H
DLD1	chr4	144361477	T	C	.	220	177	synonymous SNV	GAB1	MSI	NM_002039:c.T1527C:p.V509V
DLD1	chr4	144387367	C	T	.	89	68	nonsynonymous SNV	GAB1	MSI	NM_002039:c.C1915T:p.P639S
DLD1	chr4	153273798	G	A	.	105	127	nonsynonymous SNV	FBXW7	MSI	NM_018315:c.C85T:p.P29S
DLD1	chr5	1294143	C	T	.	62	53	synonymous SNV	TERT	MSI	NM_001193376:c.G858A:p.E286E
DLD1	chr5	14280486	T	C	.	158	159	synonymous SNV	TRIO	MSI	NM_007118:c.T288C:p.H96H
DLD1	chr5	14297249	C	A	.	124	105	synonymous SNV	TRIO	MSI	NM_007118:c.C1245A:p.A415A
DLD1	chr5	14369529	A	G	.	66	43	nonsynonymous SNV	TRIO	MSI	NM_007118:c.A3113G:p.E1038G
DLD1	chr5	14482711	T	C	.	82	50	synonymous SNV	TRIO	MSI	NM_007118:c.T6486C:p.G2162G
DLD1	chr5	40764668	C	T	.	91	78	synonymous SNV	PRKAA1	MSI	NM_006251:c.G1383A:p.Q461Q
DLD1	chr5	56152565	G	A	.	76	63	synonymous SNV	MAP3K1	MSI	NM_005921:c.G621A:p.R207R
DLD1	chr5	56160628	C	A	.	87	87	nonsynonymous SNV	MAP3K1	MSI	NM_005921:c.C902A:p.P301H
DLD1	chr5	56161248	C	T	.	124	119	nonsynonymous SNV	MAP3K1	MSI	NM_005921:c.C1117T:p.P373S
DLD1	chr5	56168469	G	A	.	49	30	stopgain SNV	MAP3K1	MSI	NM_005921:c.G1425A:p.W475X
DLD1	chr5	56189389	C	A	.	166	132	nonsynonymous SNV	MAP3K1	MSI	NM_005921:c.C4421A:p.P1474H
DLD1	chr5	66460736	C	A	.	34	31	nonsynonymous SNV	MAST4	MSI	NM_001290227:c.C4946A:p.P1649H
DLD1	chr5	66460926	G	A	.	38	30	synonymous SNV	MAST4	MSI	NM_001290227:c.G5136A:p.S1712S
DLD1	chr5	67588105	C	T	.	101	81	nonsynonymous SNV	PIK3R1	MSI	NM_181504:c.C125T:p.P42L
DLD1	chr5	96504472	C	A	.	144	136	nonsynonymous SNV	RIOK2	MSI	NM_001159749:c.G864T:p.K288N
DLD1	chr5	108207119	T	C	.	194	183	nonsynonymous SNV	FER	MSI	NM_005246:c.T719C:p.I240T
DLD1	chr5	110560284	G	A	.	85	77	nonsynonymous SNV	CAMK4	MSI	NM_001744:c.G103A:p.D35N
DLD1	chr5	110819889	G	A	.	37	43	nonsynonymous SNV	CAMK4	MSI	NM_001744:c.G1147A:p.A383T
DLD1	chr5	110820001	C	T	.	52	44	nonsynonymous SNV	CAMK4	MSI	NM_001744:c.C1259T:p.A420V
DLD1	chr5	112173289	A	G	.	131	125	synonymous SNV	APC	MSI	NM_001127511:c.A1944G:p.L648L
DLD1	chr5	112173471	G	T	.	118	113	nonsynonymous SNV	APC	MSI	NM_001127511:c.G2126T:p.R709M
DLD1	chr5	112174270	G	T	.	84	77	nonsynonymous SNV	APC	MSI	NM_001127511:c.G2925T:p.K975N
DLD1	chr5	112175539	C	-	.	0	145	frameshift deletion	APC	MSI	NM_001127511:c.4194delC:p.G1398fs
DLD1	chr5	112177787	C	T	.	141	122	stopgain SNV	APC	MSI	NM_001127511:c.C6442T:p.R2148X
DLD1	chr5	112178864	C	T	.	123	121	nonsynonymous SNV	APC	MSI	NM_001127511:c.C7519T:p.R2507C
DLD1	chr5	112770512	G	A	.	69	74	stopgain SNV	TSSK1B	MSI	NM_032028:c.C25T:p.R9X
DLD1	chr5	149515329	A	C	.	47	52	synonymous SNV	PDGFRB	MSI	NM_002609:c.T153G:p.V51V
DLD1	chr5	171544522	G	A	.	91	90	synonymous SNV	STK10	MSI	NM_005990:c.C483T:p.G161G
DLD1	chr5	176518084	G	A	.	105	88	synonymous SNV	FGFR4	MSI	NM_022963:c.G582A:p.E194E
DLD1	chr5	176520345	T	A	.	99	104	nonsynonymous SNV	FGFR4	MSI	NM_022963:c.T1070A:p.I357N
DLD1	chr5	179674448	C	A	.	116	115	nonsynonymous SNV	MAPK9	MSI	NM_001135044:c.G679T:p.G227C
DLD1	chr5	180039506	T	C	.	67	74	synonymous SNV	FLT4	MSI	NM_002020:c.A3537G:p.Q1179Q
DLD1	chr5	180055884	C	T	.	63	69	synonymous SNV	FLT4	MSI	NM_002020:c.G1101A:p.Q367Q
DLD1	chr5	180057100	G	T	.	26	25	nonsynonymous SNV	FLT4	MSI	NM_002020:c.C519A:p.S173R
DLD1	chr5	180057310	G	T	.	158	115	nonsynonymous SNV	FLT4	MSI	NM_002020:c.C428A:p.P143H
DLD1	chr6	2749518	A	G	.	0	220	nonsynonymous SNV	MYLK4	MSI	NM_001012418:c.T11C:p.V4A
DLD1	chr6	4060839	-	A	.	0	99	frameshift insertion	PRPF4B	MSI	NM_003913:c.3013_3014insA:p.E1005fs
DLD1	chr6	10802125	C	A	.	209	196	nonsynonymous SNV	MAK	MSI	NM_001242385:c.G831T:p.Q277H
DLD1	chr6	35810312	C	T	.	93	61	nonsynonymous SNV	SRPK1	MSI	NM_003137:c.G1690A:p.D564N
DLD1	chr6	36106710	C	T	.	59	43	nonsynonymous SNV	MAPK13	MSI	NM_002754:c.C896T:p.A299V
DLD1	chr6	80749526	T	C	.	100	101	synonymous SNV	TTK	MSI	NM_001166691:c.T2241C:p.I747I
DLD1	chr6	91296579	G	A	.	149	140	synonymous SNV	MAP3K7	MSI	NM_003188:c.C24T:p.S8S
DLD1	chr6	111982995	C	T	.	80	71	nonsynonymous SNV	FYN	MSI	NM_153047:c.G1552A:p.E518K
DLD1	chr6	112041025	C	T	.	145	102	nonsynonymous SNV	FYN	MSI	NM_153047:c.G230A:p.R77H
DLD1	chr6	117632241	G	T	.	71	63	nonsynonymous SNV	ROS1	MSI	NM_002944:c.C6175A:p.L2059M
DLD1	chr6	117739660	G	T	.	48	34	nonsynonymous SNV	ROS1	MSI	NM_002944:c.C133A:p.L45I
DLD1	chr6	137112996	C	T	.	80	55	synonymous SNV	MAP3K5	MSI	NM_005923:c.G300A:p.A100A
DLD1	chr6	150001052	G	A	.	174	159	nonsynonymous SNV	LATS1	MSI	NM_004690:c.C2552T:p.T851I
DLD1	chr6	161470754	A	G	.	92	118	nonsynonymous SNV	MAP3K4	MSI	NM_005922:c.A1450G:p.I484V
DLD1	chr6	161507479	A	G	.	39	50	nonsynonymous SNV	MAP3K4	MSI	NM_005922:c.A2441G:p.K814R
DLD1	chr6	161536203	G	T	.	126	102	nonsynonymous SNV	MAP3K4	MSI	NM_006724:c.G4525T:p.G1509W
DLD1	chr6	166845927	G	T	.	98	69	synonymous SNV	RPS6KA2	MSI	NM_021135:c.C1384A:p.R462R
DLD1	chr7	14378198	T	C	.	186	216	synonymous SNV	DGKB	MSI	NM_004080:c.A2067G:p.K689K
DLD1	chr7	14758180	C	A	.	140	131	nonsynonymous SNV	DGKB	MSI	NM_004080:c.G453T:p.E151D
DLD1	chr7	23776535	T	A	.	114	107	synonymous SNV	STK31	MSI	NM_001260504:c.T786A:p.A262A
DLD1	chr7	44189373	A	G	.	103	71	nonsynonymous SNV	GCK	MSI	NM_000162:c.T665C:p.V222A
DLD1	chr7	44281817	G	A	.	69	80	synonymous SNV	CAMK2B	MSI	NM_001220:c.C819T:p.C273C
DLD1	chr7	55227992	A	G	.	253	79	nonsynonymous SNV	EGFR	MSI	NM_005228:c.A1459G:p.K487E
DLD1	chr7	97816213	A	-	.	132	171	frameshift deletion	LMTK2	MSI	NM_014916:c.901delA:p.K301fs
DLD1	chr7	97822412	C	A	.	17	18	nonsynonymous SNV	LMTK2	MSI	NM_014916:c.C2635A:p.L879M
DLD1	chr7	97823481	T	C	.	75	81	nonsynonymous SNV	LMTK2	MSI	NM_014916:c.T3704C:p.L1235P
DLD1	chr7	97823499	C	T	.	77	84	nonsynonymous SNV	LMTK2	MSI	NM_014916:c.C3722T:p.S1241F
DLD1	chr7	98478835	A	G	.	164	112	nonsynonymous SNV	TRRAP	MSI	NM_001244580:c.A62G:p.Y21C
DLD1	chr7	98528274	T	G	.	99	90	nonsynonymous SNV	TRRAP	MSI	NM_001244580:c.T3412G:p.F1138V
DLD1	chr7	98591221	G	T	.	86	88	nonsynonymous SNV	TRRAP	MSI	NM_003496:c.G9779T:p.G3260V
DLD1	chr7	100411316	C	A	.	135	89	nonsynonymous SNV	EPHB4	MSI	NM_004444:c.G1714T:p.A572S
DLD1	chr7	106509704	T	C	.	89	80	synonymous SNV	PIK3CG	MSI	NM_001282426:c.T1698C:p.P566P
DLD1	chr7	106515150	T	C	.	73	65	nonsynonymous SNV	PIK3CG	MSI	NM_001282426:c.T2293C:p.S765P
DLD1	chr7	137282607	C	T	.	150	81	nonsynonymous SNV	DGKI	MSI	NM_004717:c.G1297A:p.G433S
DLD1	chr7	137308242	C	T	.	55	60	stopgain SNV	DGKI	MSI	NM_004717:c.G863A:p.W288X
DLD1	chr7	137341273	C	A	.	132	135	nonsynonymous SNV	DGKI	MSI	NM_004717:c.G620T:p.R207M
DLD1	chr7	137374739	G	T	.	175	121	synonymous SNV	DGKI	MSI	NM_004717:c.C411A:p.I137I
DLD1	chr7	138235834	T	C	.	199	168	synonymous SNV	TRIM24	MSI	NM_003852:c.T1170C:p.L390L
DLD1	chr7	139281516	G	A	.	115	131	synonymous SNV	HIPK2	MSI	NM_001113239:c.C2583T:p.I861I
DLD1	chr7	139299042	G	-	.	145	113	frameshift deletion	HIPK2	MSI	NM_001113239:c.1899delC:p.P633fs
DLD1	chr7	142566405	C	T	.	50	36	synonymous SNV	EPHB6	MSI	NM_001280795:c.C1318T:p.L440L
DLD1	chr7	143091961	C	A	.	69	74	nonsynonymous SNV	EPHA1	MSI	NM_005232:c.G2292T:p.K764N
DLD1	chr7	143095114	T	G	.	184	180	nonsynonymous SNV	EPHA1	MSI	NM_005232:c.A1514C:p.E505A
DLD1	chr7	143096452	C	T	.	44	66	nonsynonymous SNV	EPHA1	MSI	NM_005232:c.G890A:p.C297Y
DLD1	chr7	150752689	C	T	.	86	84	nonsynonymous SNV	CDK5	MSI	NM_001164410:c.G317A:p.G106E
DLD1	chr7	150754021	C	A	.	29	27	nonsynonymous SNV	CDK5	MSI	NM_001164410:c.G168T:p.K56N
DLD1	chr7	151188035	C	T	.	91	90	nonsynonymous SNV	RHEB	MSI	NM_005614:c.G118A:p.E40K
DLD1	chr8	27311778	G	A	.	128	154	synonymous SNV	PTK2B	MSI	NM_173175:c.G2577A:p.L859L
DLD1	chr8	38282161	C	A	.	190	181	nonsynonymous SNV	FGFR1	MSI	NM_001174066:c.G535T:p.A179S
DLD1	chr8	48695038	T	C	.	35	53	unknown	PRKDC	MSI	UNKNOWN
DLD1	chr8	48695127	C	T	.	27	25	unknown	PRKDC	MSI	UNKNOWN
DLD1	chr8	48801678	C	T	.	168	172	unknown	PRKDC	MSI	UNKNOWN
DLD1	chr8	48825029	A	G	.	131	166	unknown	PRKDC	MSI	UNKNOWN
DLD1	chr8	48830862	A	T	.	226	203	unknown	PRKDC	MSI	UNKNOWN
DLD1	chr8	57025556	G	T	.	37	38	nonsynonymous SNV	MOS	MSI	NM_005372:c.C986A:p.P329Q
DLD1	chr8	90792325	A	G	.	84	89	synonymous SNV	RIPK2	MSI	NM_003821:c.A876G:p.P292P
DLD1	chr8	144802405	C	A	.	19	24	nonsynonymous SNV	MAPK15	MSI	NM_139021:c.C727A:p.L243M
DLD1	chr8	145617486	C	T	.	17	12	nonsynonymous SNV	ADCK5	MSI	NM_174922:c.C1208T:p.A403V
DLD1	chr9	21974596	A	G	.	49	60	synonymous SNV	CDKN2A	MSI	NM_058197:c.T231C:p.G77G
DLD1	chr9	22008929	C	T	.	47	41	nonsynonymous SNV	CDKN2B	MSI	NM_004936:c.G24A:p.M8I
DLD1	chr9	27168504	C	T	.	226	161	nonsynonymous SNV	TEK	MSI	NM_001290078:c.C64T:p.P22S
DLD1	chr9	27169615	C	A	.	135	160	nonsynonymous SNV	TEK	MSI	NM_001290078:c.C304A:p.L102M
DLD1	chr9	32631414	T	C	.	186	220	nonsynonymous SNV	TAF1L	MSI	NM_153809:c.A4164G:p.I1388M
DLD1	chr9	32631846	C	A	.	178	157	synonymous SNV	TAF1L	MSI	NM_153809:c.G3732T:p.R1244R
DLD1	chr9	35800753	A	G	.	97	75	synonymous SNV	NPR2	MSI	NM_003995:c.A1266G:p.G422G
DLD1	chr9	35807383	T	C	.	111	145	synonymous SNV	NPR2	MSI	NM_003995:c.T2700C:p.F900F
DLD1	chr9	36633151	T	C	.	84	71	nonsynonymous SNV	MELK	MSI	NM_001256692:c.T395C:p.I132T
DLD1	chr9	71509406	C	T	.	157	199	nonsynonymous SNV	PIP5K1B	MSI	NM_001278253:c.C623T:p.T208M
DLD1	chr9	71509517	A	T	.	155	157	nonsynonymous SNV	PIP5K1B	MSI	NM_001278253:c.A734T:p.Y245F
DLD1	chr9	87285728	T	C	.	111	150	nonsynonymous SNV	NTRK2	MSI	NM_001018064:c.T65C:p.V22A
DLD1	chr9	90219936	A	G	.	53	54	nonsynonymous SNV	DAPK1	MSI	NM_001288729:c.A130G:p.I44V
DLD1	chr9	90272961	G	A	.	75	73	synonymous SNV	DAPK1	MSI	NM_001288729:c.G1842A:p.L614L
DLD1	chr9	94499674	T	C	.	71	66	synonymous SNV	ROR2	MSI	NM_004560:c.A621G:p.T207T
DLD1	chr9	94519752	G	T	.	128	148	nonsynonymous SNV	ROR2	MSI	NM_004560:c.C265A:p.P89T
DLD1	chr9	96024246	C	A	.	36	41	nonsynonymous SNV	WNK2	MSI	NM_001282394:c.C3217A:p.L1073M
DLD1	chr9	96051682	T	C	.	83	87	nonsynonymous SNV	WNK2	MSI	NM_006648:c.T4646C:p.I1549T
DLD1	chr9	127076216	G	A	.	41	56	nonsynonymous SNV	NEK6	MSI	NM_001166167:c.G300A:p.M100I
DLD1	chr9	127083817	C	T	.	84	74	nonsynonymous SNV	NEK6	MSI	NM_001166167:c.C428T:p.A143V
DLD1	chr9	131476596	C	A	.	117	121	nonsynonymous SNV	PKN3	MSI	NM_013355:c.C1433A:p.P478H
DLD1	chr9	136913396	G	A	.	28	44	nonsynonymous SNV	BRD3	MSI	NM_007371:c.C895T:p.P299S
DLD1	chr9	136913442	G	C	.	34	32	synonymous SNV	BRD3	MSI	NM_007371:c.C849G:p.G283G
DLD1	chr9	136913458	C	T	.	43	50	nonsynonymous SNV	BRD3	MSI	NM_007371:c.G833A:p.R278Q
DLD1	chr9	136915580	C	T	.	82	99	synonymous SNV	BRD3	MSI	NM_007371:c.G630A:p.S210S
DLD1	chr9	136918528	-	G	.	75	59	frameshift insertion	BRD3	MSI	NM_007371:c.72_73insC:p.P24fs
DLD1	chr10	6470236	C	A	.	106	77	nonsynonymous SNV	PRKCQ	MSI	NM_001242413:c.G1865T:p.S622I
DLD1	chr10	6533645	C	A	.	105	112	nonsynonymous SNV	PRKCQ	MSI	NM_001282645:c.G415T:p.A139S
DLD1	chr10	6540439	A	T	.	99	95	nonsynonymous SNV	PRKCQ	MSI	NM_001282645:c.T86A:p.V29D
DLD1	chr10	6540493	G	A	rs374126448	82	93	nonsynonymous SNV	PRKCQ	MSI	NM_001282645:c.C32T:p.T11M
DLD1	chr10	8100471	C	T	.	52	53	nonsynonymous SNV	GATA3	MSI	NM_001002295:c.C445T:p.H149Y
DLD1	chr10	26241153	A	G	.	123	119	synonymous SNV	MYO3A	MSI	NM_017433:c.A114G:p.V38V
DLD1	chr10	26385408	G	T	.	86	57	nonsynonymous SNV	MYO3A	MSI	NM_017433:c.G1661T:p.R554M
DLD1	chr10	26414508	C	T	.	145	134	synonymous SNV	MYO3A	MSI	NM_017433:c.C2085T:p.N695N
DLD1	chr10	26457753	A	G	.	133	135	nonsynonymous SNV	MYO3A	MSI	NM_017433:c.A3224G:p.Y1075C
DLD1	chr10	26463016	G	T	.	69	93	nonsynonymous SNV	MYO3A	MSI	NM_017433:c.G3823T:p.A1275S
DLD1	chr10	43619256	T	C	.	81	83	nonsynonymous SNV	RET	MSI	NM_020630:c.T2939C:p.M980T
DLD1	chr10	53921674	C	T	.	60	66	synonymous SNV	PRKG1	MSI	NM_001098512:c.C982T:p.L328L
DLD1	chr10	53921708	C	T	.	74	62	nonsynonymous SNV	PRKG1	MSI	NM_001098512:c.C1016T:p.A339V
DLD1	chr10	99422676	A	G	.	190	167	nonsynonymous SNV	PI4K2A	MSI	NM_018425:c.A935G:p.D312G
DLD1	chr10	101954197	A	C	.	198	70	nonsynonymous SNV	CHUK	MSI	NM_001278:c.T1811G:p.L604R
DLD1	chr10	123239116	G	A	.	85	75	synonymous SNV	FGFR2	MSI	NM_001144915:c.C2103T:p.C701C
DLD1	chr11	6629392	C	-	.	176	76	frameshift deletion	ILK	MSI	NM_001014795:c.206delC:p.T69fs
DLD1	chr11	6630128	G	C	.	51	29	nonsynonymous SNV	ILK	MSI	NM_001014795:c.G462C:p.K154N
DLD1	chr11	33308764	T	C	.	148	158	synonymous SNV	HIPK3	MSI	NM_001048200:c.T804C:p.R268R
DLD1	chr11	33374646	C	A	.	255	197	nonsynonymous SNV	HIPK3	MSI	NM_001048200:c.C3117A:p.H1039Q
DLD1	chr11	63676424	C	A	.	127	131	synonymous SNV	MARK2	MSI	NM_001163297:c.C1845A:p.R615R
DLD1	chr11	64129370	G	A	.	75	87	nonsynonymous SNV	RPS6KA4	MSI	NM_001006944:c.G802A:p.V268M
DLD1	chr11	64137785	G	A	.	156	147	nonsynonymous SNV	RPS6KA4	MSI	NM_001006944:c.G1868A:p.R623H
DLD1	chr11	64137816	C	A	.	169	189	synonymous SNV	RPS6KA4	MSI	NM_001006944:c.C1899A:p.A633A
DLD1	chr11	64603291	C	T	.	52	52	synonymous SNV	CDC42BPG	MSI	NM_017525:c.G1701A:p.Q567Q
DLD1	chr11	65380535	G	A	.	36	31	synonymous SNV	MAP3K11	MSI	NM_002419:c.C693T:p.C231C
DLD1	chr11	65381009	C	A	.	35	29	synonymous SNV	MAP3K11	MSI	NM_002419:c.G219T:p.R73R
DLD1	chr11	69456133	C	T	.	326	72	nonsynonymous SNV	CCND1	MSI	NM_053056:c.C52T:p.P18S
DLD1	chr11	108124672	G	T	.	295	126	nonsynonymous SNV	ATM	MSI	NM_000051:c.G2030T:p.S677I
DLD1	chr11	111572299	G	T	.	285	133	nonsynonymous SNV	SIK2	MSI	NM_015191:c.G727T:p.D243Y
DLD1	chr11	113270216	C	A	.	63	82	nonsynonymous SNV	ANKK1	MSI	NM_178510:c.C1525A:p.L509M
DLD1	chr11	113270261	C	T	.	106	35	stopgain SNV	ANKK1	MSI	NM_178510:c.C1570T:p.Q524X
DLD1	chr11	113270849	G	A	.	93	53	nonsynonymous SNV	ANKK1	MSI	NM_178510:c.G2158A:p.V720I
DLD1	chr11	116728647	G	A	.	191	235	synonymous SNV	SIK3	MSI	NM_001281749:c.C3210T:p.T1070T
DLD1	chr11	116767987	G	A	.	173	294	synonymous SNV	SIK3	MSI	NM_001281749:c.C663T:p.T221T
DLD1	chr12	994257	G	A	.	210	171	synonymous SNV	WNK1	MSI	NM_014823:c.G3546A:p.P1182P
DLD1	chr12	4385274	T	G	.	144	125	nonsynonymous SNV	CCND2	MSI	NM_001759:c.T299G:p.L100R
DLD1	chr12	4722844	G	T	.	106	97	nonsynonymous SNV	DYRK4	MSI	NM_001282285:c.G630T:p.E210D
DLD1	chr12	14772183	G	T	.	78	86	nonsynonymous SNV	GUCY2C	MSI	NM_004963:c.C2837A:p.T946K
DLD1	chr12	14832658	G	T	.	204	202	nonsynonymous SNV	GUCY2C	MSI	NM_004963:c.C763A:p.L255I
DLD1	chr12	18435422	C	T	.	114	151	nonsynonymous SNV	PIK3C2G	MSI	NM_001288772:c.C407T:p.A136V
DLD1	chr12	18439825	C	T	.	145	155	synonymous SNV	PIK3C2G	MSI	NM_001288772:c.C723T:p.S241S
DLD1	chr12	18552771	T	A	.	91	112	nonsynonymous SNV	PIK3C2G	MSI	NM_004570:c.T2182A:p.L728M
DLD1	chr12	25398281	C	T	rs112445441	202	198	nonsynonymous SNV	KRAS	MSI	NM_004985:c.G38A:p.G13D
DLD1	chr12	40629428	A	G	.	108	106	synonymous SNV	LRRK2	MSI	NM_198578:c.A348G:p.Q116Q
DLD1	chr12	40668678	T	C	.	102	85	synonymous SNV	LRRK2	MSI	NM_198578:c.T1824C:p.S608S
DLD1	chr12	40713870	A	-	.	157	164	frameshift deletion	LRRK2	MSI	NM_198578:c.4908delA:p.S1636fs
DLD1	chr12	52307029	G	A	.	59	47	nonsynonymous SNV	ACVRL1	MSI	NM_001077401:c.G208A:p.G70R
DLD1	chr12	52377808	G	A	.	123	121	stopgain SNV	ACVR1B	MSI	NM_004302:c.G837A:p.W279X
DLD1	chr12	52385722	T	A	.	162	171	nonsynonymous SNV	ACVR1B	MSI	NM_004302:c.T1337A:p.V446D
DLD1	chr12	53777104	C	A	.	36	32	nonsynonymous SNV	SP1	MSI	NM_001251825:c.C1229A:p.P410H
DLD1	chr12	53804999	T	A	.	78	83	nonsynonymous SNV	SP1	MSI	NM_001251825:c.T2189A:p.I730N
DLD1	chr12	53818684	G	T	.	21	18	nonsynonymous SNV	AMHR2	MSI	NM_001164690:c.G424T:p.G142C
DLD1	chr12	56330869	G	T	.	232	218	stopgain SNV	DGKA	MSI	NM_001345:c.G133T:p.G45X
DLD1	chr12	56478922	C	A	.	167	176	nonsynonymous SNV	ERBB3	MSI	NM_001005915:c.C378A:p.N126K
DLD1	chr12	56479090	T	C	.	155	129	synonymous SNV	ERBB3	MSI	NM_001005915:c.T546C:p.A182A
DLD1	chr12	56489535	G	A	.	190	229	nonsynonymous SNV	ERBB3	MSI	NM_001982:c.G2000A:p.R667H
DLD1	chr12	56495068	C	A	.	120	145	nonsynonymous SNV	ERBB3	MSI	NM_001982:c.C3425A:p.P1142H
DLD1	chr12	58145003	G	A	.	145	145	nonsynonymous SNV	CDK4	MSI	NM_000075:c.C341T:p.A114V
DLD1	chr12	64878258	A	G	.	87	61	nonsynonymous SNV	TBK1	MSI	NM_013254:c.A1168G:p.I390V
DLD1	chr12	66597638	G	A	.	138	117	nonsynonymous SNV	IRAK3	MSI	NM_007199:c.G281A:p.G94E
DLD1	chr12	68050942	C	T	.	142	109	synonymous SNV	DYRK2	MSI	NM_003583:c.C36T:p.H12H
DLD1	chr12	106460634	A	C	.	87	71	nonsynonymous SNV	NUAK1	MSI	NM_014840:c.T1932G:p.D644E
DLD1	chr12	106461537	A	G	.	86	79	synonymous SNV	NUAK1	MSI	NM_014840:c.T1029C:p.A343A
DLD1	chr12	106461608	G	T	.	84	94	nonsynonymous SNV	NUAK1	MSI	NM_014840:c.C958A:p.L320I
DLD1	chr12	112303995	C	T	.	195	149	nonsynonymous SNV	MAPKAPK5	MSI	NM_003668:c.C146T:p.A49V
DLD1	chr12	117993070	G	T	.	119	79	synonymous SNV	KSR2	MSI	NM_173598:c.C1335A:p.S445S
DLD1	chr12	118681231	G	A	.	129	132	nonsynonymous SNV	TAOK3	MSI	NM_016281:c.C283T:p.H95Y
DLD1	chr12	120128173	C	A	.	86	84	nonsynonymous SNV	CIT	MSI	NM_007174:c.G5843T:p.S1948I
DLD1	chr12	120146115	G	A	.	220	222	nonsynonymous SNV	CIT	MSI	NM_007174:c.C4954T:p.R1652W
DLD1	chr12	120150490	C	T	.	124	118	synonymous SNV	CIT	MSI	NM_007174:c.G4464A:p.R1488R
DLD1	chr12	120241190	G	T	.	111	121	nonsynonymous SNV	CIT	MSI	NM_001206999:c.C1115A:p.P372H
DLD1	chr12	121678297	C	T	.	114	104	nonsynonymous SNV	CAMKK2	MSI	NM_001270486:c.G1645A:p.A549T
DLD1	chr12	121678328	TT	-	.	32	98	frameshift deletion	CAMKK2	MSI	NM_001270486:c.1613_1614del:p.538_538del
DLD1	chr12	121678544	G	A	.	36	37	synonymous SNV	CAMKK2	MSI	NM_172216:c.C1596T:p.R532R
DLD1	chr12	121698156	G	T	.	163	125	synonymous SNV	CAMKK2	MSI	NM_001270486:c.C762A:p.V254V
DLD1	chr12	132399663	C	A	.	59	58	nonsynonymous SNV	ULK1	MSI	NM_003565:c.C1409A:p.P470H
DLD1	chr12	132400662	G	A	.	42	28	synonymous SNV	ULK1	MSI	NM_003565:c.G1836A:p.L612L
DLD1	chr13	21549154	G	A	.	146	143	nonsynonymous SNV	LATS2	MSI	NM_014572:c.C3122T:p.T1041I
DLD1	chr13	21557540	G	A	.	53	48	nonsynonymous SNV	LATS2	MSI	NM_014572:c.C2305T:p.R769W
DLD1	chr13	21557550	C	A	.	52	52	nonsynonymous SNV	LATS2	MSI	NM_014572:c.G2295T:p.E765D
DLD1	chr13	26927963	G	T	.	204	220	nonsynonymous SNV	CDK8	MSI	NM_001260:c.G402T:p.Q134H
DLD1	chr13	28901668	A	G	.	228	182	synonymous SNV	FLT1	MSI	NM_002019:c.T2727C:p.V909V
DLD1	chr13	28919619	C	T	.	239	222	stopgain SNV	FLT1	MSI	NM_002019:c.G2318A:p.W773X
DLD1	chr13	28964090	A	G	.	177	175	synonymous SNV	FLT1	MSI	NM_001159920:c.T1812C:p.I604I
DLD1	chr13	29008264	C	A	.	129	144	nonsynonymous SNV	FLT1	MSI	NM_001159920:c.G607T:p.G203W
DLD1	chr13	32912090	TG	-	rs80359391	91	108	frameshift deletion	BRCA2	MSI	NM_000059:c.3598_3599del:p.1200_1200del
DLD1	chr13	32912560	G	A	rs28897724	100	79	synonymous SNV	BRCA2	MSI	NM_000059:c.G4068A:p.L1356L
DLD1	chr13	32913837	A	-	rs80359509	80	94	frameshift deletion	BRCA2	MSI	NM_000059:c.5345delA:p.Q1782fs
DLD1	chr13	32929096	A	-	.	179	151	frameshift deletion	BRCA2	MSI	NM_000059:c.7106delA:p.E2369fs
DLD1	chr13	32944558	G	A	rs80359076	194	190	nonsynonymous SNV	BRCA2	MSI	NM_000059:c.G8351A:p.R2784Q
DLD1	chr13	36367545	G	A	.	219	201	synonymous SNV	DCLK1	MSI	NM_001195415:c.C1095T:p.G365G
DLD1	chr13	36396868	G	T	.	154	156	nonsynonymous SNV	DCLK1	MSI	NM_001195415:c.C631A:p.L211M
DLD1	chr13	36410265	T	A	.	189	156	nonsynonymous SNV	DCLK1	MSI	NM_001195415:c.A213T:p.E71D
DLD1	chr13	99116069	A	G	.	112	111	synonymous SNV	STK24	MSI	NM_001286649:c.T748C:p.L250L
DLD1	chr13	110434713	C	T	.	36	18	nonsynonymous SNV	IRS2	MSI	NM_003749:c.G3688A:p.G1230S
DLD1	chr13	110434973	C	-	.	81	42	frameshift deletion	IRS2	MSI	NM_003749:c.3428delG:p.G1143fs
DLD1	chr13	110435005	G	A	.	25	93	synonymous SNV	IRS2	MSI	NM_003749:c.C3396T:p.G1132G
DLD1	chr13	110435140	G	A	.	38	56	synonymous SNV	IRS2	MSI	NM_003749:c.C3261T:p.I1087I
DLD1	chr13	110435575	C	T	.	89	38	synonymous SNV	IRS2	MSI	NM_003749:c.G2826A:p.A942A
DLD1	chr13	110436009	C	T	.	125	62	nonsynonymous SNV	IRS2	MSI	NM_003749:c.G2392A:p.V798I
DLD1	chr13	110437495	C	T	.	256	126	synonymous SNV	IRS2	MSI	NM_003749:c.G906A:p.P302P
DLD1	chr13	114321830	G	A	.	149	90	synonymous SNV	GRK1	MSI	NM_002929:c.G129A:p.P43P
DLD1	chr14	30105592	A	G	.	159	93	nonsynonymous SNV	PRKD1	MSI	NM_002742:c.T1094C:p.V365A
DLD1	chr14	30108057	T	C	.	82	81	synonymous SNV	PRKD1	MSI	NM_002742:c.A750G:p.Q250Q
DLD1	chr14	35872562	G	T	.	85	49	nonsynonymous SNV	NFKBIA	MSI	NM_020529:c.C341A:p.P114Q
DLD1	chr14	71197214	C	T	.	58	54	synonymous SNV	MAP3K9	MSI	NM_001284232:c.G2397A:p.T799T
DLD1	chr14	71209079	C	T	.	147	167	nonsynonymous SNV	MAP3K9	MSI	NM_001284232:c.G638A:p.S213N
DLD1	chr14	93408175	C	A	.	107	111	nonsynonymous SNV	ITPK1	MSI	NM_001142593:c.G976T:p.A326S
DLD1	chr14	103447355	G	A	.	87	104	stopgain SNV	CDC42BPB	MSI	NM_006035:c.C895T:p.R299X
DLD1	chr15	40265207	G	A	.	197	143	nonsynonymous SNV	EIF2AK4	MSI	NM_001013703:c.G1652A:p.S551N
DLD1	chr15	40265836	C	T	.	168	162	synonymous SNV	EIF2AK4	MSI	NM_001013703:c.C1704T:p.N568N
DLD1	chr15	40477495	C	A	.	55	57	nonsynonymous SNV	BUB1B	MSI	NM_001211:c.C881A:p.P294Q
DLD1	chr15	41794210	G	T	.	45	41	nonsynonymous SNV	ITPKA	MSI	NM_002220:c.G819T:p.E273D
DLD1	chr15	41799301	A	T	.	152	129	nonsynonymous SNV	LTK	MSI	NM_001135685:c.T1234A:p.S412T
DLD1	chr15	41799834	G	A	.	163	143	nonsynonymous SNV	LTK	MSI	NM_001135685:c.C1088T:p.P363L
DLD1	chr15	50940891	C	A	.	201	152	nonsynonymous SNV	TRPM7	MSI	NM_017672:c.G314T:p.R105I
DLD1	chr15	64275749	C	T	.	46	45	synonymous SNV	DAPK2	MSI	NM_014326:c.G297A:p.V99V
DLD1	chr15	64497079	A	G	.	62	46	nonsynonymous SNV	CSNK1G1	MSI	NM_022048:c.T835C:p.C279R
DLD1	chr15	75091016	C	T	.	22	42	stopgain SNV	CSK	MSI	NM_004383:c.C76T:p.Q26X
DLD1	chr15	75091026	C	T	.	47	24	nonsynonymous SNV	CSK	MSI	NM_004383:c.C86T:p.P29L
DLD1	chr15	85383840	G	A	.	75	40	nonsynonymous SNV	ALPK3	MSI	NM_020778:c.G1936A:p.E646K
DLD1	chr15	85401355	C	T	.	71	65	nonsynonymous SNV	ALPK3	MSI	NM_020778:c.C3992T:p.S1331L
DLD1	chr15	91430472	T	C	.	89	83	synonymous SNV	FES	MSI	NM_001143783:c.T366C:p.F122F
DLD1	chr15	91436906	C	A	.	83	103	nonsynonymous SNV	FES	MSI	NM_001143783:c.C1894A:p.L632M
DLD1	chr15	91437287	G	T	.	148	52	nonsynonymous SNV	FES	MSI	NM_001143783:c.G2151T:p.K717N
DLD1	chr15	99465549	A	G	.	190	164	nonsynonymous SNV	IGF1R	MSI	NM_000875:c.A2374G:p.N792D
DLD1	chr15	99500395	G	T	.	93	64	nonsynonymous SNV	IGF1R	MSI	NM_000875:c.G3828T:p.E1276D
DLD1	chr15	101567995	G	A	.	78	58	synonymous SNV	LRRK1	MSI	NM_024652:c.G2679A:p.L893L
DLD1	chr15	101586313	T	C	.	125	66	nonsynonymous SNV	LRRK1	MSI	NM_024652:c.T3091C:p.F1031L
DLD1	chr15	101592032	C	T	.	45	44	stopgain SNV	LRRK1	MSI	NM_024652:c.C3556T:p.Q1186X
DLD1	chr15	101605621	G	T	.	18	21	nonsynonymous SNV	LRRK1	MSI	NM_024652:c.G4979T:p.G1660V
DLD1	chr15	101606846	C	T	.	35	35	nonsynonymous SNV	LRRK1	MSI	NM_024652:c.C5770T:p.R1924C
DLD1	chr16	18828698	A	G	.	139	108	nonsynonymous SNV	SMG1	MSI	NM_015092:c.T9989C:p.I3330T
DLD1	chr16	18841614	C	T	.	120	85	nonsynonymous SNV	SMG1	MSI	NM_015092:c.G8870A:p.G2957D
DLD1	chr16	18849510	C	T	.	74	78	synonymous SNV	SMG1	MSI	NM_015092:c.G7239A:p.L2413L
DLD1	chr16	18860584	C	T	.	167	120	nonsynonymous SNV	SMG1	MSI	NM_015092:c.G5578A:p.A1860T
DLD1	chr16	18893585	C	T	.	100	64	nonsynonymous SNV	SMG1	MSI	NM_015092:c.G1195A:p.A399T
DLD1	chr16	23634395	C	A	.	107	113	nonsynonymous SNV	PALB2	MSI	NM_024675:c.G2891T:p.G964V
DLD1	chr16	23646397	G	A	rs45612837	139	128	synonymous SNV	PALB2	MSI	NM_024675:c.C1470T:p.P490P
DLD1	chr16	23646454	T	C	.	133	122	synonymous SNV	PALB2	MSI	NM_024675:c.A1413G:p.G471G
DLD1	chr16	23646714	C	T	.	145	139	nonsynonymous SNV	PALB2	MSI	NM_024675:c.G1153A:p.A385T
DLD1	chr16	23702742	A	G	.	45	30	nonsynonymous SNV	ERN2	MSI	NM_033266:c.T2525C:p.V842A
DLD1	chr16	23716247	G	A	.	111	103	nonsynonymous SNV	ERN2	MSI	NM_033266:c.C955T:p.R319W
DLD1	chr16	23718096	G	-	.	22	38	frameshift deletion	ERN2	MSI	NM_033266:c.610delC:p.R204fs
DLD1	chr16	24135196	A	G	.	58	71	nonsynonymous SNV	PRKCB	MSI	NM_002738:c.A959G:p.K320R
DLD1	chr16	24192241	G	A	.	49	42	nonsynonymous SNV	PRKCB	MSI	NM_002738:c.G1525A:p.A509T
DLD1	chr16	29998306	G	T	.	115	80	stopgain SNV	TAOK2	MSI	NM_016151:c.G2713T:p.E905X
DLD1	chr16	30128181	C	T	.	44	64	nonsynonymous SNV	MAPK3	MSI	NM_001040056:c.G1051A:p.A351T
DLD1	chr16	30129762	G	T	.	114	120	nonsynonymous SNV	MAPK3	MSI	NM_001040056:c.C451A:p.L151M
DLD1	chr16	30129787	A	G	.	130	122	synonymous SNV	MAPK3	MSI	NM_001040056:c.T426C:p.H142H
DLD1	chr16	30133199	A	G	.	165	167	nonsynonymous SNV	MAPK3	MSI	NM_001040056:c.T299C:p.V100A
DLD1	chr16	30767535	G	T	.	146	162	stopgain SNV	PHKG2	MSI	NM_000294:c.G589T:p.E197X
DLD1	chr16	68847305	G	T	.	74	62	nonsynonymous SNV	CDH1	MSI	NM_004360:c.G1227T:p.W409C
DLD1	chr16	68867196	C	A	.	178	187	nonsynonymous SNV	CDH1	MSI	NM_004360:c.C2443A:p.L815M
DLD1	chr16	74716646	C	T	.	104	124	nonsynonymous SNV	MLKL	MSI	NM_152649:c.G859A:p.E287K
DLD1	chr17	4795781	G	A	.	33	48	synonymous SNV	MINK1	MSI	NM_001024937:c.G2112A:p.Q704Q
DLD1	chr17	4797476	A	T	.	66	79	nonsynonymous SNV	MINK1	MSI	NM_015716:c.A2567T:p.E856V
DLD1	chr17	7286254	T	C	.	74	74	synonymous SNV	TNK1	MSI	NM_001251902:c.T9C:p.P3P
DLD1	chr17	7289966	C	T	.	42	32	synonymous SNV	TNK1	MSI	NM_001251902:c.C1224T:p.I408I
DLD1	chr17	7577559	G	A	rs28934573	71	70	nonsynonymous SNV	TP53	MSI	NM_000546:c.C722T:p.S241F
DLD1	chr17	7907173	T	C	.	21	17	nonsynonymous SNV	GUCY2D	MSI	NM_000180:c.T725C:p.V242A
DLD1	chr17	7909891	C	T	.	118	125	nonsynonymous SNV	GUCY2D	MSI	NM_000180:c.C1237T:p.R413W
DLD1	chr17	7915893	G	T	.	68	35	nonsynonymous SNV	GUCY2D	MSI	NM_000180:c.G2082T:p.Q694H
DLD1	chr17	8791715	C	A	.	14	22	synonymous SNV	PIK3R5	MSI	NM_001251852:c.G231T:p.L77L
DLD1	chr17	19284815	G	A	.	14	13	nonsynonymous SNV	MAPK7	MSI	NM_139032:c.G876A:p.M292I
DLD1	chr17	19286145	C	A	.	87	91	nonsynonymous SNV	MAPK7	MSI	NM_139032:c.C1766A:p.P589H
DLD1	chr17	25932597	G	A	.	22	22	stopgain SNV	KSR1	MSI	NM_014238:c.G1407A:p.W469X
DLD1	chr17	25944354	C	T	.	28	22	stopgain SNV	KSR1	MSI	NM_014238:c.C2182T:p.Q728X
DLD1	chr17	29509557	T	C	.	97	96	synonymous SNV	NF1	MSI	NM_000267:c.T762C:p.D254D
DLD1	chr17	29559790	C	T	.	135	82	synonymous SNV	NF1	MSI	NM_000267:c.C3387T:p.G1129G
DLD1	chr17	29653105	A	G	.	133	118	synonymous SNV	NF1	MSI	NM_000267:c.A5040G:p.K1680K
DLD1	chr17	37882000	T	G	.	51	66	synonymous SNV	ERBB2	MSI	NM_001289937:c.T2766G:p.P922P
DLD1	chr17	38450280	G	A	.	133	60	stopgain SNV	CDC6	MSI	NM_001254:c.G915A:p.W305X
DLD1	chr17	41246473	G	A	.	186	164	nonsynonymous SNV	BRCA1	MSI	NM_007297:c.C934T:p.P312S
DLD1	chr17	48184444	C	A	.	141	131	synonymous SNV	PDK2	MSI	NM_001199899:c.C420A:p.A140A
DLD1	chr17	48266121	G	A	.	212	228	synonymous SNV	COL1A1	MSI	NM_000088:c.C3081T:p.D1027D
DLD1	chr17	48273722	G	A	.	192	193	nonsynonymous SNV	COL1A1	MSI	NM_000088:c.C910T:p.R304C
DLD1	chr17	58022845	C	T	.	176	111	stopgain SNV	RPS6KB1	MSI	NM_001272042:c.C1237T:p.R413X
DLD1	chr17	67537856	G	T	.	179	139	nonsynonymous SNV	MAP2K6	MSI	NM_002758:c.G967T:p.D323Y
DLD1	chr17	74001394	G	A	.	77	64	nonsynonymous SNV	CDK3	MSI	NM_001258:c.G808A:p.D270N
DLD1	chr17	74383537	G	T	.	57	39	nonsynonymous SNV	SPHK1	MSI	NM_001142602:c.G1025T:p.G342V
DLD1	chr17	79094604	G	A	.	26	19	synonymous SNV	AATK	MSI	NM_004920:c.C2823T:p.S941S
DLD1	chr17	79094689	C	T	.	23	17	nonsynonymous SNV	AATK	MSI	NM_004920:c.G2738A:p.G913D
DLD1	chr17	79097064	C	T	.	16	17	nonsynonymous SNV	AATK	MSI	NM_004920:c.G733A:p.A245T
DLD1	chr17	80223642	G	A	.	103	132	nonsynonymous SNV	CSNK1D	MSI	NM_001893:c.C107T:p.A36V
DLD1	chr18	18533623	C	T	.	232	230	nonsynonymous SNV	ROCK1	MSI	NM_005406:c.G3977A:p.R1326H
DLD1	chr18	18650494	T	A	.	53	37	nonsynonymous SNV	ROCK1	MSI	NM_005406:c.A174T:p.R58S
DLD1	chr18	39617680	T	-	.	173	165	frameshift deletion	PIK3C3	MSI	NM_002647:c.1864delT:p.F622fs
DLD1	chr18	48190650	A	G	.	97	67	nonsynonymous SNV	MAPK4	MSI	NM_001292040:c.A322G:p.M108V
DLD1	chr18	59919949	C	T	.	134	105	nonsynonymous SNV	KIAA1468	MSI	NM_020854:c.C1786T:p.R596C
DLD1	chr19	1221962	G	C	.	94	113	nonsynonymous SNV	STK11	MSI	NM_000455:c.G877C:p.E293Q
DLD1	chr19	3656553	G	A	.	25	28	synonymous SNV	PIP5K1C	MSI	NM_001195733:c.C471T:p.Y157Y
DLD1	chr19	3963891	G	T	.	123	127	nonsynonymous SNV	DAPK3	MSI	NM_001348:c.C580A:p.L194M
DLD1	chr19	3964739	G	T	.	119	105	nonsynonymous SNV	DAPK3	MSI	NM_001348:c.C313A:p.L105M
DLD1	chr19	4099226	G	A	.	76	61	nonsynonymous SNV	MAP2K2	MSI	NM_030662:c.C892T:p.P298S
DLD1	chr19	7126647	C	A	.	79	93	synonymous SNV	INSR	MSI	NM_001079817:c.G2925T:p.P975P
DLD1	chr19	7975348	G	A	.	52	60	nonsynonymous SNV	MAP2K7	MSI	NM_001297556:c.G458A:p.R153H
DLD1	chr19	7975919	G	A	.	203	201	nonsynonymous SNV	MAP2K7	MSI	NM_001297556:c.G730A:p.V244I
DLD1	chr19	7976336	G	T	.	72	74	stopgain SNV	MAP2K7	MSI	NM_001297556:c.G973T:p.G325X
DLD1	chr19	10475393	C	T	.	32	17	nonsynonymous SNV	TYK2	MSI	NM_003331:c.G1264A:p.G422S
DLD1	chr19	12969180	G	A	.	39	46	nonsynonymous SNV	MAST1	MSI	NM_014975:c.G1082A:p.R361H
DLD1	chr19	12976588	T	C	.	31	46	nonsynonymous SNV	MAST1	MSI	NM_014975:c.T1862C:p.I621T
DLD1	chr19	12984760	C	A	.	94	85	synonymous SNV	MAST1	MSI	NM_014975:c.C3789A:p.R1263R
DLD1	chr19	14218167	G	A	.	47	28	nonsynonymous SNV	PRKACA	MSI	NM_002730:c.C101T:p.P34L
DLD1	chr19	14554332	C	A	.	27	25	nonsynonymous SNV	PKN1	MSI	NM_002741:c.C373A:p.L125M
DLD1	chr19	14578408	A	C	.	10	16	nonsynonymous SNV	PKN1	MSI	NM_002741:c.A1763C:p.E588A
DLD1	chr19	14581025	C	A	.	58	79	nonsynonymous SNV	PKN1	MSI	NM_002741:c.C2344A:p.L782M
DLD1	chr19	15367974	T	C	.	86	74	nonsynonymous SNV	BRD4	MSI	NM_014299:c.A1352G:p.E451G
DLD1	chr19	15374278	A	G	.	146	126	nonsynonymous SNV	BRD4	MSI	NM_014299:c.T1294C:p.Y432H
DLD1	chr19	18278088	C	T	.	107	115	synonymous SNV	PIK3R2	MSI	NM_005027:c.C1708T:p.L570L
DLD1	chr19	19625977	T	C	.	122	100	nonsynonymous SNV	TSSK6	MSI	NM_032037:c.A260G:p.Y87C
DLD1	chr19	39078433	T	C	.	34	44	synonymous SNV	MAP4K1	MSI	NM_001042600:c.A2421G:p.P807P
DLD1	chr19	39660275	C	T	.	30	22	nonsynonymous SNV	PAK4	MSI	NM_001014832:c.C82T:p.H28Y
DLD1	chr19	39664497	C	T	.	59	67	synonymous SNV	PAK4	MSI	NM_001014834:c.C486T:p.G162G
DLD1	chr19	40698191	G	A	.	25	22	nonsynonymous SNV	MAP3K10	MSI	NM_002446:c.G253A:p.A85T
DLD1	chr19	41759607	A	G	.	109	88	nonsynonymous SNV	AXL	MSI	NM_001278599:c.A1226G:p.N409S
DLD1	chr19	42744225	G	T	.	85	99	nonsynonymous SNV	GSK3A	MSI	NM_019884:c.C353A:p.A118D
DLD1	chr19	46273824	C	T	.	130	141	stopgain SNV	DMPK	MSI	NM_001288765:c.G1541A:p.W514X
DLD1	chr19	46275908	C	A	.	59	67	nonsynonymous SNV	DMPK	MSI	NM_001288765:c.G1068T:p.Q356H
DLD1	chr19	46275913	G	A	.	62	70	nonsynonymous SNV	DMPK	MSI	NM_001288765:c.C1063T:p.P355S
DLD1	chr19	47195036	G	T	.	115	86	nonsynonymous SNV	PRKD2	MSI	NM_001079882:c.C1187A:p.P396H
DLD1	chr19	47204327	G	A	.	164	134	nonsynonymous SNV	PRKD2	MSI	NM_001079882:c.C461T:p.P154L
DLD1	chr19	47214174	G	A	.	23	39	synonymous SNV	PRKD2	MSI	NM_001079882:c.C30T:p.L10L
DLD1	chr19	49129312	C	T	.	78	52	synonymous SNV	SPHK2	MSI	NM_001204160:c.C96T:p.T32T
DLD1	chr19	49132104	A	T	.	32	28	nonsynonymous SNV	SPHK2	MSI	NM_001204160:c.A931T:p.S311C
DLD1	chr19	49132830	C	T	.	82	73	nonsynonymous SNV	SPHK2	MSI	NM_001204160:c.C1657T:p.R553C
DLD1	chr19	54403697	C	T	.	104	109	synonymous SNV	PRKCG	MSI	NM_002739:c.C1398T:p.I466I
DLD1	chr20	377266	C	T	.	44	67	nonsynonymous SNV	TRIB3	MSI	NM_021158:c.C1009T:p.P337S
DLD1	chr20	9520165	G	A	.	84	76	synonymous SNV	PAK7	MSI	NM_177990:c.C2104T:p.L702L
DLD1	chr20	9523299	C	T	.	146	143	synonymous SNV	PAK7	MSI	NM_177990:c.G1938A:p.E646E
DLD1	chr20	9546603	T	C	.	126	85	synonymous SNV	PAK7	MSI	NM_177990:c.A1419G:p.K473K
DLD1	chr20	30419920	T	C	.	44	47	nonsynonymous SNV	MYLK2	MSI	NM_033118:c.T1691C:p.L564P
DLD1	chr20	30661599	G	T	.	40	29	nonsynonymous SNV	HCK	MSI	NM_001172129:c.G244T:p.D82Y
DLD1	chr20	36028564	T	C	.	71	38	synonymous SNV	SRC	MSI	NM_005417:c.T906C:p.P302P
DLD1	chr20	42204991	G	T	.	49	42	nonsynonymous SNV	SGK2	MSI	NM_016276:c.G1001T:p.R334M
DLD1	chr20	54945572	G	A	.	77	91	nonsynonymous SNV	AURKA	MSI	NM_003600:c.C998T:p.T333I
DLD1	chr20	54963226	A	G	.	157	138	nonsynonymous SNV	AURKA	MSI	NM_003600:c.T28C:p.S10P
DLD1	chr21	33246179	C	T	.	29	18	synonymous SNV	HUNK	MSI	NM_014586:c.C192T:p.G64G
DLD1	chr21	33318424	C	T	.	141	192	synonymous SNV	HUNK	MSI	NM_014586:c.C687T:p.Y229Y
DLD1	chr21	43187079	A	G	.	79	61	synonymous SNV	RIPK4	MSI	NM_020639:c.T123C:p.H41H
DLD1	chr22	19119876	C	T	.	46	59	nonsynonymous SNV	TSSK2	MSI	NM_053006:c.C964T:p.R322W
DLD1	chr22	21075620	G	A	.	85	93	synonymous SNV	PI4KA	MSI	NM_002650:c.C1338T:p.N446N
DLD1	chr22	21081601	C	A	.	109	84	nonsynonymous SNV	PI4KA	MSI	NM_002650:c.G1114T:p.G372C
DLD1	chr22	21081621	G	A	.	97	132	nonsynonymous SNV	PI4KA	MSI	NM_002650:c.C1094T:p.A365V
DLD1	chr22	21153426	A	G	.	188	148	synonymous SNV	PI4KA	MSI	NM_058004:c.T1959C:p.D653D
DLD1	chr22	26070449	G	A	.	224	212	nonsynonymous SNV	ADRBK2	MSI	NM_005160:c.G601A:p.G201R
DLD1	chr22	29107949	G	T	.	163	183	nonsynonymous SNV	CHEK2	MSI	NM_007194:c.C740A:p.A247D
DLD1	chr22	29121242	G	A	rs137853007	174	193	nonsynonymous SNV	CHEK2	MSI	NM_007194:c.C433T:p.R145W
DLD1	chr22	31621765	T	C	.	33	22	nonsynonymous SNV	LIMK2	MSI	NM_005569:c.T76C:p.Y26H
DLD1	chr22	31654313	C	A	.	44	51	stopgain SNV	LIMK2	MSI	NM_001031801:c.C90A:p.Y30X
DLD1	chr22	38696011	C	A	.	145	151	nonsynonymous SNV	CSNK1E	MSI	NM_001894:c.G625T:p.G209C
DLD1	chr22	38696756	C	T	.	56	47	nonsynonymous SNV	CSNK1E	MSI	NM_001894:c.G538A:p.A180T
DLD1	chr22	50703780	C	A	.	79	83	nonsynonymous SNV	MAPK11	MSI	NM_002751:c.G985T:p.A329S
DLD1	chr22	50703923	G	A	.	158	138	nonsynonymous SNV	MAPK11	MSI	NM_002751:c.C842T:p.A281V
DLD1	chr22	50706024	G	A	.	19	21	synonymous SNV	MAPK11	MSI	NM_002751:c.C279T:p.A93A
DLD1	chrX	15555268	C	T	.	0	85	synonymous SNV	BMX	MSI	NM_001721:c.C1234T:p.L412L
DLD1	chrX	15568114	G	A	.	0	41	stopgain SNV	BMX	MSI	NM_001721:c.G1947A:p.W649X
DLD1	chrX	18627589	G	C	.	0	54	nonsynonymous SNV	CDKL5	MSI	NM_003159:c.G2051C:p.G684A
DLD1	chrX	20193296	G	A	.	0	168	nonsynonymous SNV	RPS6KA3	MSI	NM_004586:c.C1213T:p.H405Y
DLD1	chrX	21609298	T	C	.	0	160	nonsynonymous SNV	CNKSR2	MSI	NM_001168647:c.T1726C:p.Y576H
DLD1	chrX	54224972	G	T	.	0	78	nonsynonymous SNV	WNK3	MSI	NM_001002838:c.C5017A:p.P1673T
DLD1	chrX	100613615	T	C	.	1	172	nonsynonymous SNV	BTK	MSI	NM_000061:c.A964G:p.K322E
DLD1	chrX	105190007	G	T	.	0	28	nonsynonymous SNV	NRK	MSI	NM_198465:c.G4203T:p.K1401N
DLD1	chrX	107976289	C	T	.	0	95	nonsynonymous SNV	IRS4	MSI	NM_003604:c.G3286A:p.A1096T
DLD1	chrX	107978532	C	T	.	0	38	nonsynonymous SNV	IRS4	MSI	NM_003604:c.G1043A:p.G348D
DLD1	chrX	108718458	A	G	.	0	41	synonymous SNV	GUCY2F	MSI	NM_001522:c.T708C:p.I236I
EB	chr1	220835497	C	T	.	77	124	nonsynonymous SNV	MARK1	MSS	NM_001286128:c.C2266T:p.L756F
EB	chr1	226923792	G	A	.	28	49	synonymous SNV	ITPKB	MSS	NM_002221:c.C1368T:p.S456S
EB	chr1	228520592	T	C	rs372152690	91	204	synonymous SNV	OBSCN	MSS	NM_001098623:c.T15684C:p.D5228D
EB	chr2	179396979	C	T	.	61	115	nonsynonymous SNV	TTN	MSS	NM_003319:c.G77168A:p.S25723N
EB	chr2	179597225	T	G	.	107	45	synonymous SNV	TTN	MSS	NM_133378:c.A12831C:p.T4277T
EB	chr2	179650670	C	T	.	88	46	nonsynonymous SNV	TTN	MSS	NM_003319:c.G2137A:p.V713I
EB	chr2	220347520	C	T	.	156	58	synonymous SNV	SPEG	MSS	NM_005876:c.C5580T:p.G1860G
EB	chr3	178936091	G	A	rs104886003	67	123	nonsynonymous SNV	PIK3CA	MSS	NM_006218:c.G1633A:p.E545K
EB	chr5	112173917	C	T	rs121913333	55	102	stopgain SNV	APC	MSS	NM_001127511:c.C2572T:p.R858X
EB	chr5	112175675	-	AG	.	84	39	frameshift insertion	APC	MSS	NM_001127511:c.4330_4331insAG:p.K1444fs
EB	chr6	43111193	C	T	.	88	85	nonsynonymous SNV	PTK7	MSS	NM_152881:c.C1696T:p.P566S
EB	chr9	94499744	C	T	.	36	82	nonsynonymous SNV	ROR2	MSS	NM_004560:c.G551A:p.R184H
EB	chr9	130550650	C	T	.	120	45	nonsynonymous SNV	CDK9	MSS	NM_001261:c.C590T:p.P197L
EB	chr11	63671526	G	A	.	34	22	nonsynonymous SNV	MARK2	MSS	NM_001039469:c.G1583A:p.R528H
EB	chr12	25398284	C	T	rs121913529	176	148	nonsynonymous SNV	KRAS	MSS	NM_004985:c.G35A:p.G12D
EB	chr12	40692955	T	G	.	225	188	nonsynonymous SNV	LRRK2	MSS	NM_198578:c.T3392G:p.L1131R
EB	chr14	30396586	G	T	.	37	35	nonsynonymous SNV	PRKD1	MSS	NM_002742:c.C133A:p.P45T
EB	chr17	79093270	-	GGGCGT	.	45	29	nonframeshift insertion	AATK	MSS	NM_004920:c.3685_3686insACGCCC:p.A1229delinsTPA
EB	chr19	40698142	G	A	.	12	33	synonymous SNV	MAP3K10	MSS	NM_002446:c.G204A:p.V68V
EB	chr20	2082757	A	G	.	34	28	nonsynonymous SNV	STK35	MSS	NM_080836:c.A230G:p.D77G
EB	chr20	2097893	C	A	.	167	120	nonsynonymous SNV	STK35	MSS	NM_080836:c.C1474A:p.Q492K
EB	chrX	107975870	G	A	.	143	68	synonymous SNV	IRS4	MSS	NM_003604:c.C3705T:p.D1235D
FRI	chr1	38187472	C	T	rs372692877	32	21	nonsynonymous SNV	EPHA10	MSS	NM_001099439:c.G2006A:p.R669H
FRI	chr1	38227373	C	T	.	84	74	nonsynonymous SNV	EPHA10	MSS	NM_001099439:c.G554A:p.R185Q
FRI	chr2	179591904	G	T	.	101	27	nonsynonymous SNV	TTN	MSS	NM_133378:c.C16456A:p.L5486I
FRI	chr3	9801366	G	T	rs150868701	48	32	nonsynonymous SNV	CAMK1	MSS	NM_003656:c.C814A:p.Q272K
FRI	chr3	96962978	A	T	.	65	71	stopgain SNV	EPHA6	MSS	NM_001080448:c.A1453T:p.R485X
FRI	chr3	134968196	C	T	.	41	36	synonymous SNV	EPHB1	MSS	NM_004441:c.C2709T:p.L903L
FRI	chr3	178936091	G	A	rs104886003	90	54	nonsynonymous SNV	PIK3CA	MSS	NM_006218:c.G1633A:p.E545K
FRI	chr3	184294786	C	G	.	29	23	stopgain SNV	EPHB3	MSS	NM_004443:c.C1169G:p.S390X
FRI	chr4	2242641	T	A	.	84	71	nonsynonymous SNV	HAUS3	MSS	NM_024511:c.A33T:p.L11F
FRI	chr5	112102954	G	A	.	102	87	nonsynonymous SNV	APC	MSS	NM_001127511:c.G319A:p.G107R
FRI	chr5	112173917	C	T	rs121913333	71	74	stopgain SNV	APC	MSS	NM_001127511:c.C2572T:p.R858X
FRI	chr5	112175951	-	A	.	82	46	frameshift insertion	APC	MSS	NM_001127511:c.4606_4607insA:p.E1536fs
FRI	chr5	122924193	G	C	.	91	116	nonsynonymous SNV	CSNK1G3	MSS	NM_001270574:c.G493C:p.E165Q
FRI	chr6	136913424	C	A	.	0	137	nonsynonymous SNV	MAP3K5	MSS	NM_005923:c.G3112T:p.D1038Y
FRI	chr8	48710933	C	T	.	68	55	unknown	PRKDC	MSS	UNKNOWN
FRI	chr9	32635477	G	T	.	84	84	nonsynonymous SNV	TAF1L	MSS	NM_153809:c.C101A:p.P34Q
FRI	chr11	46388142	G	T	.	56	19	synonymous SNV	DGKZ	MSS	NM_001105540:c.G336T:p.G112G
FRI	chr12	25398281	C	T	rs112445441	0	135	nonsynonymous SNV	KRAS	MSS	NM_004985:c.G38A:p.G13D
FRI	chr12	40651100	G	A	.	83	34	nonsynonymous SNV	LRRK2	MSS	NM_198578:c.G1339A:p.E447K
FRI	chr17	7577108	C	A	.	0	46	nonsynonymous SNV	TP53	MSS	NM_000546:c.G830T:p.C277F
FRI	chrX	3592790	G	A	.	9	46	nonsynonymous SNV	PRKX	MSS	NM_005044:c.C184T:p.R62W
HCC2998	chr1	11169375	A	C	.	133	123	nonsynonymous SNV	MTOR	MSS	NM_004958:c.T7500G:p.I2500M
HCC2998	chr1	11210263	C	A	.	160	148	nonsynonymous SNV	MTOR	MSS	NM_004958:c.G4490T:p.C1497F
HCC2998	chr1	11272449	G	A	.	197	173	stopgain SNV	MTOR	MSS	NM_004958:c.C3481T:p.R1161X
HCC2998	chr1	11308151	G	A	.	132	135	nonsynonymous SNV	MTOR	MSS	NM_004958:c.C841T:p.R281C
HCC2998	chr1	32745323	A	G	.	50	54	nonsynonymous SNV	LCK	MSS	NM_001042771:c.A1016G:p.N339S
HCC2998	chr1	32751160	G	A	.	190	185	nonsynonymous SNV	LCK	MSS	NM_001042771:c.G1373A:p.R458H
HCC2998	chr1	44878354	T	G	.	117	85	nonsynonymous SNV	RNF220	MSS	NM_018150:c.T585G:p.D195E
HCC2998	chr1	46500836	C	T	.	65	61	nonsynonymous SNV	MAST2	MSS	NM_015112:c.C4495T:p.R1499C
HCC2998	chr1	57157092	G	T	.	78	82	nonsynonymous SNV	PRKAA2	MSS	NM_006252:c.G262T:p.D88Y
HCC2998	chr1	64643824	A	C	.	103	95	nonsynonymous SNV	ROR1	MSS	NM_005012:c.A2100C:p.E700D
HCC2998	chr1	65305439	C	T	.	99	91	nonsynonymous SNV	JAK1	MSS	NM_002227:c.G2689A:p.E897K
HCC2998	chr1	65309886	C	T	.	138	126	nonsynonymous SNV	JAK1	MSS	NM_002227:c.G2264A:p.R755Q
HCC2998	chr1	89237359	T	G	.	119	135	nonsynonymous SNV	PKN2	MSS	NM_006256:c.T782G:p.F261C
HCC2998	chr1	89294288	T	G	.	84	96	stopgain SNV	PKN2	MSS	NM_006256:c.T2544G:p.Y848X
HCC2998	chr1	91977344	C	A	.	137	96	nonsynonymous SNV	CDC7	MSS	NM_001134419:c.C436A:p.L146M
HCC2998	chr1	92442734	G	A	.	152	148	synonymous SNV	BRDT	MSS	NM_001242807:c.G615A:p.K205K
HCC2998	chr1	92442839	G	T	.	173	130	nonsynonymous SNV	BRDT	MSS	NM_001242807:c.G720T:p.K240N
HCC2998	chr1	92446681	G	T	.	150	130	stopgain SNV	BRDT	MSS	NM_001242807:c.G1558T:p.E520X
HCC2998	chr1	151288974	C	T	.	36	40	nonsynonymous SNV	PI4KB	MSS	NM_002651:c.G20A:p.R7Q
HCC2998	chr1	169833556	T	G	.	180	161	synonymous SNV	SCYL3	MSS	NM_020423:c.A909C:p.P303P
HCC2998	chr1	204401451	C	A	.	198	185	synonymous SNV	PIK3C2B	MSS	NM_002646:c.G4032T:p.T1344T
HCC2998	chr1	204426878	C	T	.	233	257	nonsynonymous SNV	PIK3C2B	MSS	NM_002646:c.G1691A:p.R564H
HCC2998	chr1	205119899	C	T	.	78	67	synonymous SNV	DSTYK	MSS	NM_015375:c.G2376A:p.K792K
HCC2998	chr1	220773163	A	G	.	71	89	nonsynonymous SNV	MARK1	MSS	NM_001286124:c.A382G:p.T128A
HCC2998	chr1	220792047	C	T	.	69	61	nonsynonymous SNV	MARK1	MSS	NM_001286128:c.C793T:p.L265F
HCC2998	chr1	220809214	G	T	.	96	82	nonsynonymous SNV	MARK1	MSS	NM_001286128:c.G1250T:p.R417I
HCC2998	chr1	220835339	T	G	.	117	107	nonsynonymous SNV	MARK1	MSS	NM_001286128:c.T2108G:p.L703R
HCC2998	chr1	226923849	C	T	.	39	38	stopgain SNV	ITPKB	MSS	NM_002221:c.G1311A:p.W437X
HCC2998	chr1	227216373	T	G	.	197	211	nonsynonymous SNV	CDC42BPA	MSS	NM_014826:c.A4069C:p.N1357H
HCC2998	chr1	243800978	G	A	.	165	155	stopgain SNV	AKT3	MSS	NM_005465:c.C496T:p.R166X
HCC2998	chr2	11341170	T	G	.	218	172	nonsynonymous SNV	ROCK2	MSS	NM_004850:c.A2823C:p.K941N
HCC2998	chr2	11361430	C	T	.	235	218	nonsynonymous SNV	ROCK2	MSS	NM_004850:c.G1153A:p.D385N
HCC2998	chr2	11364475	T	G	.	145	144	nonsynonymous SNV	ROCK2	MSS	NM_004850:c.A980C:p.N327T
HCC2998	chr2	37364131	T	G	.	117	117	synonymous SNV	EIF2AK2	MSS	NM_001135652:c.A717C:p.A239A
HCC2998	chr2	39507488	A	C	.	93	63	nonsynonymous SNV	MAP4K3	MSS	NM_001270425:c.T1576G:p.C526G
HCC2998	chr2	88874576	C	A	.	108	126	stopgain SNV	EIF2AK3	MSS	NM_004836:c.G2425T:p.E809X
HCC2998	chr2	88882959	T	G	.	148	129	synonymous SNV	EIF2AK3	MSS	NM_004836:c.A1752C:p.G584G
HCC2998	chr2	111399719	T	G	.	160	174	nonsynonymous SNV	BUB1	MSS	NM_001278616:c.A2380C:p.N794H
HCC2998	chr2	111406817	G	T	.	83	91	nonsynonymous SNV	BUB1	MSS	NM_001278616:c.C2281A:p.Q761K
HCC2998	chr2	112686893	C	T	.	130	96	synonymous SNV	MERTK	MSS	NM_006343:c.C258T:p.V86V
HCC2998	chr2	112767626	T	A	.	154	167	nonsynonymous SNV	MERTK	MSS	NM_006343:c.T2062A:p.L688M
HCC2998	chr2	112786409	G	A	rs200644454	180	156	nonsynonymous SNV	MERTK	MSS	NM_006343:c.G2968A:p.D990N
HCC2998	chr2	148657097	G	T	.	147	120	stopgain SNV	ACVR2A	MSS	NM_001278580:c.G10T:p.E4X
HCC2998	chr2	171508168	G	A	.	134	128	nonsynonymous SNV	MYO3B	MSS	NM_001083615:c.G3683A:p.R1228Q
HCC2998	chr2	171509592	T	G	.	129	167	nonsynonymous SNV	MYO3B	MSS	NM_001083615:c.T3906G:p.F1302L
HCC2998	chr2	179403456	A	C	.	164	166	nonsynonymous SNV	TTN	MSS	NM_003319:c.T71905G:p.W23969G
HCC2998	chr2	179403534	G	T	.	109	106	nonsynonymous SNV	TTN	MSS	NM_003319:c.C71827A:p.L23943I
HCC2998	chr2	179425410	G	A	.	132	94	synonymous SNV	TTN	MSS	NM_003319:c.C58254T:p.I19418I
HCC2998	chr2	179427434	T	C	.	100	116	nonsynonymous SNV	TTN	MSS	NM_003319:c.A56230G:p.T18744A
HCC2998	chr2	179437602	A	C	.	70	62	synonymous SNV	TTN	MSS	NM_003319:c.T46062G:p.A15354A
HCC2998	chr2	179449484	C	T	.	155	190	synonymous SNV	TTN	MSS	NM_003319:c.G37689A:p.Q12563Q
HCC2998	chr2	179452926	T	C	.	112	117	nonsynonymous SNV	TTN	MSS	NM_003319:c.A36013G:p.N12005D
HCC2998	chr2	179464554	C	A	.	141	133	stopgain SNV	TTN	MSS	NM_003319:c.G28879T:p.E9627X
HCC2998	chr2	179478494	T	G	.	99	91	nonsynonymous SNV	TTN	MSS	NM_003319:c.A22321C:p.K7441Q
HCC2998	chr2	179484794	T	G	.	125	141	nonsynonymous SNV	TTN	MSS	NM_003319:c.A19155C:p.K6385N
HCC2998	chr2	179485571	G	T	.	149	108	nonsynonymous SNV	TTN	MSS	NM_003319:c.C18571A:p.L6191I
HCC2998	chr2	179498050	C	T	.	94	81	nonsynonymous SNV	TTN	MSS	NM_003319:c.G15755A:p.R5252Q
HCC2998	chr2	179498622	C	A	.	144	193	stopgain SNV	TTN	MSS	NM_003319:c.G15409T:p.E5137X
HCC2998	chr2	179558686	G	T	.	228	192	nonsynonymous SNV	TTN	MSS	NM_133378:c.C27744A:p.F9248L
HCC2998	chr2	179577879	A	G	.	205	200	synonymous SNV	TTN	MSS	NM_133378:c.T23250C:p.G7750G
HCC2998	chr2	179579858	G	A	.	126	141	synonymous SNV	TTN	MSS	NM_133378:c.C22323T:p.S7441S
HCC2998	chr2	179580465	C	A	.	116	111	nonsynonymous SNV	TTN	MSS	NM_133378:c.G21944T:p.R7315I
HCC2998	chr2	179583434	G	T	.	189	142	nonsynonymous SNV	TTN	MSS	NM_133378:c.C20761A:p.L6921I
HCC2998	chr2	179588829	T	C	.	168	180	nonsynonymous SNV	TTN	MSS	NM_133378:c.A17425G:p.T5809A
HCC2998	chr2	179592948	A	C	.	128	113	nonsynonymous SNV	TTN	MSS	NM_133378:c.T15871G:p.S5291A
HCC2998	chr2	179593359	A	G	.	157	120	nonsynonymous SNV	TTN	MSS	NM_133378:c.T15562C:p.S5188P
HCC2998	chr2	179599238	C	A	.	145	133	stopgain SNV	TTN	MSS	NM_133378:c.G11581T:p.E3861X
HCC2998	chr2	179615321	G	A	.	187	160	stopgain SNV	TTN	MSS	NM_133379:c.C11806T:p.R3936X
HCC2998	chr2	179616217	A	T	.	130	153	nonsynonymous SNV	TTN	MSS	NM_133379:c.T10910A:p.F3637Y
HCC2998	chr2	179616687	G	A	.	120	147	synonymous SNV	TTN	MSS	NM_133379:c.C10440T:p.H3480H
HCC2998	chr2	179629435	T	G	.	125	127	nonsynonymous SNV	TTN	MSS	NM_003319:c.A9669C:p.K3223N
HCC2998	chr2	179658178	C	A	.	169	207	stopgain SNV	TTN	MSS	NM_001256850:c.G1489T:p.E497X
HCC2998	chr2	197028048	T	G	.	190	175	nonsynonymous SNV	STK17B	MSS	NM_004226:c.A60C:p.Q20H
HCC2998	chr2	202340350	A	C	.	206	159	nonsynonymous SNV	STRADB	MSS	NM_001206864:c.A433C:p.S145R
HCC2998	chr2	212285295	C	A	.	199	193	nonsynonymous SNV	ERBB4	MSS	NM_001042599:c.G3006T:p.K1002N
HCC2998	chr2	212530138	G	T	.	161	137	nonsynonymous SNV	ERBB4	MSS	NM_001042599:c.C1781A:p.P594Q
HCC2998	chr2	212652823	A	C	.	227	199	nonsynonymous SNV	ERBB4	MSS	NM_001042599:c.T483G:p.I161M
HCC2998	chr3	12645699	G	A	rs80338796	187	197	nonsynonymous SNV	RAF1	MSS	NM_002880:c.C770T:p.S257L
HCC2998	chr3	27332221	G	T	.	171	142	nonsynonymous SNV	NEK10	MSS	NM_199347:c.C1630A:p.L544I
HCC2998	chr3	27363694	G	A	.	18	27	synonymous SNV	NEK10	MSS	NM_199347:c.C421T:p.L141L
HCC2998	chr3	38291470	G	T	.	196	171	stopgain SNV	OXSR1	MSS	NM_005109:c.G1336T:p.E446X
HCC2998	chr3	38519422	G	A	.	56	60	nonsynonymous SNV	ACVR2B	MSS	NM_001106:c.G331A:p.E111K
HCC2998	chr3	48726145	G	A	.	88	78	nonsynonymous SNV	IP6K2	MSS	NM_001005909:c.C842T:p.S281L
HCC2998	chr3	89478269	G	T	.	150	97	nonsynonymous SNV	EPHA3	MSS	NM_005233:c.G2088T:p.M696I
HCC2998	chr3	96533804	C	T	.	25	22	synonymous SNV	EPHA6	MSS	NM_001080448:c.C337T:p.L113L
HCC2998	chr3	96706306	T	G	.	99	81	nonsynonymous SNV	EPHA6	MSS	NM_001080448:c.T583G:p.Y195D
HCC2998	chr3	123453056	C	A	.	90	82	stopgain SNV	MYLK	MSS	NM_053025:c.G787T:p.E263X
HCC2998	chr3	124215227	T	G	.	142	101	synonymous SNV	KALRN	MSS	NM_001024660:c.T4896G:p.S1632S
HCC2998	chr3	124385403	C	T	.	190	184	synonymous SNV	KALRN	MSS	NM_007064:c.C1359T:p.F453F
HCC2998	chr3	124431847	T	G	.	263	125	nonsynonymous SNV	KALRN	MSS	NM_007064:c.T3050G:p.F1017C
HCC2998	chr3	130424439	T	G	.	164	149	nonsynonymous SNV	PIK3R4	MSS	NM_014602:c.A2898C:p.E966D
HCC2998	chr3	130452513	T	G	.	152	156	nonsynonymous SNV	PIK3R4	MSS	NM_014602:c.A1329C:p.K443N
HCC2998	chr3	133910789	C	T	.	138	134	unknown	RYK	MSS	UNKNOWN
HCC2998	chr3	133921645	T	G	.	199	204	unknown	RYK	MSS	UNKNOWN
HCC2998	chr3	134885846	G	A	.	57	58	nonsynonymous SNV	EPHB1	MSS	NM_004441:c.G1757A:p.R586Q
HCC2998	chr3	134898755	G	A	.	109	96	nonsynonymous SNV	EPHB1	MSS	NM_004441:c.G1813A:p.E605K
HCC2998	chr3	134977855	G	T	.	64	44	nonsynonymous SNV	EPHB1	MSS	NM_004441:c.G2848T:p.D950Y
HCC2998	chr3	138417834	C	T	.	215	184	nonsynonymous SNV	PIK3CB	MSS	NM_001256045:c.G221A:p.R74Q
HCC2998	chr3	138461575	C	T	.	190	195	nonsynonymous SNV	PIK3CB	MSS	NM_006219:c.G446A:p.R149Q
HCC2998	chr3	141499290	G	T	.	259	233	nonsynonymous SNV	GRK7	MSS	NM_139209:c.G687T:p.K229N
HCC2998	chr3	142188273	T	C	.	189	174	nonsynonymous SNV	ATR	MSS	NM_001184:c.A6458G:p.H2153R
HCC2998	chr3	170013719	C	T	.	138	123	nonsynonymous SNV	PRKCI	MSS	NM_002740:c.C1438T:p.R480C
HCC2998	chr3	170786722	A	C	.	85	84	stopgain SNV	TNIK	MSS	NM_001161566:c.T3338G:p.L1113X
HCC2998	chr3	170885008	G	A	.	216	68	synonymous SNV	TNIK	MSS	NM_001161560:c.C825T:p.S275S
HCC2998	chr3	186024706	T	G	.	98	114	nonsynonymous SNV	DGKG	MSS	NM_001080744:c.A128C:p.Q43P
HCC2998	chr3	195599211	T	C	.	55	42	nonsynonymous SNV	TNK2	MSS	NM_001010938:c.A1576G:p.I526V
HCC2998	chr4	2238103	T	G	.	185	175	nonsynonymous SNV	HAUS3	MSS	NM_024511:c.A1430C:p.K477T
HCC2998	chr4	55594083	G	T	.	145	135	nonsynonymous SNV	KIT	MSS	NM_000222:c.G1869T:p.K623N
HCC2998	chr4	55987314	T	G	.	159	172	nonsynonymous SNV	KDR	MSS	NM_002253:c.A111C:p.Q37H
HCC2998	chr4	66356383	T	G	.	66	57	nonsynonymous SNV	EPHA5	MSS	NM_001281765:c.A1114C:p.S372R
HCC2998	chr4	79766149	A	C	.	166	142	nonsynonymous SNV	BMP2K	MSS	NM_017593:c.A614C:p.K205T
HCC2998	chr4	82058611	T	G	.	281	285	nonsynonymous SNV	PRKG2	MSS	NM_001282481:c.A310C:p.K104Q
HCC2998	chr4	107092301	G	A	.	82	73	nonsynonymous SNV	TBCK	MSS	NM_033115:c.C1997T:p.S666L
HCC2998	chr4	113352189	G	T	.	52	38	stopgain SNV	ALPK1	MSS	NM_001253884:c.G1252T:p.E418X
HCC2998	chr4	113353066	A	G	.	62	54	nonsynonymous SNV	ALPK1	MSS	NM_001253884:c.A2129G:p.E710G
HCC2998	chr4	128807351	T	G	.	157	144	nonsynonymous SNV	PLK4	MSS	NM_001190799:c.T730G:p.L244V
HCC2998	chr4	151000529	C	A	.	54	77	nonsynonymous SNV	DCLK2	MSS	NM_001040260:c.C350A:p.P117H
HCC2998	chr4	153244092	G	A	.	208	194	nonsynonymous SNV	FBXW7	MSS	NM_001013415:c.C1711T:p.R571W
HCC2998	chr4	170398361	G	A	.	162	158	nonsynonymous SNV	NEK1	MSS	NM_001199399:c.C2057T:p.S686F
HCC2998	chr5	14465736	T	C	.	77	42	nonsynonymous SNV	TRIO	MSS	NM_007118:c.T5750C:p.V1917A
HCC2998	chr5	14479440	A	G	.	140	137	nonsynonymous SNV	TRIO	MSS	NM_007118:c.A6224G:p.Y2075C
HCC2998	chr5	56160744	G	C	.	57	64	nonsynonymous SNV	MAP3K1	MSS	NM_005921:c.G1018C:p.V340L
HCC2998	chr5	56178471	T	G	.	159	60	synonymous SNV	MAP3K1	MSS	NM_005921:c.T3444G:p.T1148T
HCC2998	chr5	57753027	C	T	.	54	60	nonsynonymous SNV	PLK2	MSS	NM_006622:c.G989A:p.R330Q
HCC2998	chr5	66445247	T	C	.	152	146	nonsynonymous SNV	MAST4	MSS	NM_001290226:c.T2507C:p.I836T
HCC2998	chr5	66460420	C	T	.	30	38	synonymous SNV	MAST4	MSS	NM_001290227:c.C4630T:p.L1544L
HCC2998	chr5	67589618	C	T	.	228	194	stopgain SNV	PIK3R1	MSS	NM_001242466:c.C292T:p.R98X
HCC2998	chr5	112173285	T	A	.	155	139	stopgain SNV	APC	MSS	NM_001127511:c.T1940A:p.L647X
HCC2998	chr5	112175639	C	T	rs121913332	95	76	stopgain SNV	APC	MSS	NM_001127511:c.C4294T:p.R1432X
HCC2998	chr5	112176882	C	A	.	117	109	nonsynonymous SNV	APC	MSS	NM_001127511:c.C5537A:p.S1846Y
HCC2998	chr5	112177791	T	G	.	160	131	nonsynonymous SNV	APC	MSS	NM_001127511:c.T6446G:p.I2149S
HCC2998	chr5	112179451	T	G	.	143	122	nonsynonymous SNV	APC	MSS	NM_001127511:c.T8106G:p.N2702K
HCC2998	chr5	112769747	C	T	.	99	113	nonsynonymous SNV	TSSK1B	MSS	NM_032028:c.G790A:p.D264N
HCC2998	chr5	122923775	A	G	.	179	133	synonymous SNV	CSNK1G3	MSS	NM_001270574:c.A348G:p.R116R
HCC2998	chr5	133647992	A	C	.	102	145	nonsynonymous SNV	CDKL3	MSS	NM_001113575:c.T872G:p.F291C
HCC2998	chr5	146703619	A	G	.	45	27	nonsynonymous SNV	STK32A	MSS	NM_001112724:c.A419G:p.Q140R
HCC2998	chr5	146730662	G	A	.	41	47	synonymous SNV	STK32A	MSS	NM_001112724:c.G507A:p.A169A
HCC2998	chr5	146752762	T	G	.	260	267	nonsynonymous SNV	STK32A	MSS	NM_001112724:c.T808G:p.S270A
HCC2998	chr5	149513446	C	A	.	88	69	stopgain SNV	PDGFRB	MSS	NM_002609:c.G757T:p.E253X
HCC2998	chr5	156608060	G	A	.	110	112	synonymous SNV	ITK	MSS	NM_005546:c.G72A:p.S24S
HCC2998	chr5	179669700	G	T	.	190	182	nonsynonymous SNV	MAPK9	MSS	NM_002752:c.C744A:p.F248L
HCC2998	chr6	4032186	A	C	.	118	95	nonsynonymous SNV	PRPF4B	MSS	NM_003913:c.A435C:p.E145D
HCC2998	chr6	4052984	T	C	.	93	115	synonymous SNV	PRPF4B	MSS	NM_003913:c.T2343C:p.Y781Y
HCC2998	chr6	35837605	A	C	.	160	164	nonsynonymous SNV	SRPK1	MSS	NM_003137:c.T1065G:p.N355K
HCC2998	chr6	43109672	T	G	.	82	61	nonsynonymous SNV	PTK7	MSS	NM_152881:c.T1382G:p.F461C
HCC2998	chr6	52876712	A	G	.	166	111	synonymous SNV	ICK	MSS	NM_014920:c.T1347C:p.F449F
HCC2998	chr6	80744707	T	G	.	66	66	nonsynonymous SNV	TTK	MSS	NM_001166691:c.T1617G:p.F539L
HCC2998	chr6	112035566	G	T	.	79	92	nonsynonymous SNV	FYN	MSS	NM_153047:c.C328A:p.Q110K
HCC2998	chr6	116381214	T	G	.	67	82	nonsynonymous SNV	FRK	MSS	NM_002031:c.A261C:p.K87N
HCC2998	chr6	117629975	C	A	.	92	86	nonsynonymous SNV	ROS1	MSS	NM_002944:c.G6551T:p.R2184I
HCC2998	chr6	136883722	C	A	.	204	209	stopgain SNV	MAP3K5	MSS	NM_005923:c.G3793T:p.E1265X
HCC2998	chr7	14733723	G	T	.	132	212	nonsynonymous SNV	DGKB	MSS	NM_004080:c.C688A:p.L230I
HCC2998	chr7	23808687	A	C	.	278	170	nonsynonymous SNV	STK31	MSS	NM_001260504:c.A1421C:p.K474T
HCC2998	chr7	23810651	A	C	.	133	67	nonsynonymous SNV	STK31	MSS	NM_001260504:c.A1672C:p.I558L
HCC2998	chr7	43635593	T	G	.	245	115	nonsynonymous SNV	STK17A	MSS	NM_004760:c.T300G:p.D100E
HCC2998	chr7	73535371	C	T	.	25	65	synonymous SNV	LIMK1	MSS	NM_001204426:c.C1671T:p.P557P
HCC2998	chr7	95215093	C	T	.	152	57	nonsynonymous SNV	PDK4	MSS	NM_002612:c.G1096A:p.A366T
HCC2998	chr7	95216379	T	A	.	94	32	synonymous SNV	PDK4	MSS	NM_002612:c.A1038T:p.G346G
HCC2998	chr7	95216417	A	C	.	96	32	nonsynonymous SNV	PDK4	MSS	NM_002612:c.T1000G:p.L334V
HCC2998	chr7	95224455	C	A	.	288	113	nonsynonymous SNV	PDK4	MSS	NM_002612:c.G152T:p.R51I
HCC2998	chr7	97770839	T	G	.	315	159	nonsynonymous SNV	LMTK2	MSS	NM_014916:c.T362G:p.F121C
HCC2998	chr7	100411558	G	A	.	18	49	synonymous SNV	EPHB4	MSS	NM_004444:c.C1674T:p.V558V
HCC2998	chr7	106508824	G	A	.	102	67	nonsynonymous SNV	PIK3CG	MSS	NM_001282426:c.G818A:p.R273H
HCC2998	chr7	106509402	C	A	.	91	138	nonsynonymous SNV	PIK3CG	MSS	NM_001282426:c.C1396A:p.L466M
HCC2998	chr7	137263038	C	T	.	379	176	nonsynonymous SNV	DGKI	MSS	NM_004717:c.G1676A:p.R559Q
HCC2998	chr7	137282621	C	T	.	316	111	nonsynonymous SNV	DGKI	MSS	NM_004717:c.G1283A:p.R428Q
HCC2998	chr7	137282627	T	G	.	307	109	nonsynonymous SNV	DGKI	MSS	NM_004717:c.A1277C:p.N426T
HCC2998	chr7	138262238	C	T	.	143	257	stopgain SNV	TRIM24	MSS	NM_003852:c.C2059T:p.R687X
HCC2998	chr7	138268707	T	G	.	140	254	nonsynonymous SNV	TRIM24	MSS	NM_003852:c.T2804G:p.F935C
HCC2998	chr7	139281672	C	T	.	195	112	synonymous SNV	HIPK2	MSS	NM_001113239:c.G2427A:p.E809E
HCC2998	chr7	141255292	G	A	.	184	337	nonsynonymous SNV	AGK	MSS	NM_018238:c.G26A:p.R9Q
HCC2998	chr7	150776044	C	T	.	137	247	synonymous SNV	FASTK	MSS	NM_033015:c.G147A:p.P49P
HCC2998	chr8	27308345	T	C	.	77	66	nonsynonymous SNV	PTK2B	MSS	NM_173175:c.T2294C:p.I765T
HCC2998	chr8	27668516	G	A	.	205	169	nonsynonymous SNV	PBK	MSS	NM_001278945:c.C764T:p.S255L
HCC2998	chr8	38271164	G	A	.	72	96	synonymous SNV	FGFR1	MSS	NM_001174066:c.C2184T:p.G728G
HCC2998	chr8	48710958	A	C	.	106	100	unknown	PRKDC	MSS	UNKNOWN
HCC2998	chr8	48809816	A	G	.	317	122	unknown	PRKDC	MSS	UNKNOWN
HCC2998	chr8	48827957	C	A	.	184	174	unknown	PRKDC	MSS	UNKNOWN
HCC2998	chr8	48848316	G	T	.	206	184	unknown	PRKDC	MSS	UNKNOWN
HCC2998	chr8	56910929	G	A	.	242	196	nonsynonymous SNV	LYN	MSS	NM_001111097:c.G1012A:p.E338K
HCC2998	chr8	57025507	G	A	.	46	39	synonymous SNV	MOS	MSS	NM_005372:c.C1035T:p.L345L
HCC2998	chr8	99591893	G	A	.	161	172	nonsynonymous SNV	STK3	MSS	NM_001256313:c.C614T:p.S205L
HCC2998	chr8	99779547	C	T	.	190	173	nonsynonymous SNV	STK3	MSS	NM_001256313:c.G160A:p.A54T
HCC2998	chr9	5089837	A	C	.	147	160	nonsynonymous SNV	JAK2	MSS	NM_004972:c.A2735C:p.K912T
HCC2998	chr9	27229187	T	G	.	240	216	nonsynonymous SNV	TEK	MSS	NM_001290078:c.T2888G:p.F963C
HCC2998	chr9	32633565	T	C	.	119	127	synonymous SNV	TAF1L	MSS	NM_153809:c.A2013G:p.Q671Q
HCC2998	chr9	32633905	C	T	.	158	162	nonsynonymous SNV	TAF1L	MSS	NM_153809:c.G1673A:p.R558Q
HCC2998	chr9	32634452	C	T	.	216	181	nonsynonymous SNV	TAF1L	MSS	NM_153809:c.G1126A:p.E376K
HCC2998	chr9	35807340	T	G	.	186	165	nonsynonymous SNV	NPR2	MSS	NM_003995:c.T2657G:p.L886R
HCC2998	chr9	77354751	T	C	.	167	192	nonsynonymous SNV	TRPM6	MSS	NM_001177310:c.A5360G:p.D1787G
HCC2998	chr9	77377674	T	G	.	181	142	nonsynonymous SNV	TRPM6	MSS	NM_001177310:c.A3898C:p.N1300H
HCC2998	chr9	77386712	T	G	.	105	81	nonsynonymous SNV	TRPM6	MSS	NM_001177310:c.A3428C:p.D1143A
HCC2998	chr9	77403649	A	C	.	93	69	nonsynonymous SNV	TRPM6	MSS	NM_001177310:c.T2533G:p.L845V
HCC2998	chr9	77454972	C	T	.	139	150	nonsynonymous SNV	TRPM6	MSS	NM_001177310:c.G497A:p.G166E
HCC2998	chr9	77455096	C	A	.	150	109	stopgain SNV	TRPM6	MSS	NM_001177310:c.G373T:p.E125X
HCC2998	chr9	87359904	G	A	.	238	94	synonymous SNV	NTRK2	MSS	NM_001018064:c.G1212A:p.A404A
HCC2998	chr9	87475959	C	A	.	93	95	nonsynonymous SNV	NTRK2	MSS	NM_001018065:c.C1401A:p.F467L
HCC2998	chr9	90114051	G	A	.	74	87	nonsynonymous SNV	DAPK1	MSS	NM_001288729:c.G59A:p.G20D
HCC2998	chr9	93624611	C	T	.	66	40	synonymous SNV	SYK	MSS	NM_001135052:c.C702T:p.F234F
HCC2998	chr9	101904926	T	G	.	135	148	nonsynonymous SNV	TGFBR1	MSS	NM_001130916:c.T683G:p.L228R
HCC2998	chr9	113449474	G	A	.	148	161	nonsynonymous SNV	MUSK	MSS	NM_001166280:c.G284A:p.G95D
HCC2998	chr9	136917503	A	C	.	178	167	nonsynonymous SNV	BRD3	MSS	NM_007371:c.T276G:p.N92K
HCC2998	chr10	6521096	T	G	.	124	112	nonsynonymous SNV	PRKCQ	MSS	NM_001282645:c.A836C:p.Q279P
HCC2998	chr10	8111484	A	G	.	64	61	nonsynonymous SNV	GATA3	MSS	NM_001002295:c.A973G:p.T325A
HCC2998	chr10	26377290	T	A	.	167	216	synonymous SNV	MYO3A	MSS	NM_017433:c.T1518A:p.I506I
HCC2998	chr10	26417375	T	G	.	230	198	nonsynonymous SNV	MYO3A	MSS	NM_017433:c.T2170G:p.F724V
HCC2998	chr10	27456129	A	C	.	150	136	nonsynonymous SNV	MASTL	MSS	NM_001172303:c.A910C:p.S304R
HCC2998	chr10	27459496	C	T	.	135	163	synonymous SNV	MASTL	MSS	NM_001172303:c.C1608T:p.L536L
HCC2998	chr10	53564378	G	A	.	204	174	nonsynonymous SNV	PRKG1	MSS	NM_001098512:c.G581A:p.R194Q
HCC2998	chr10	89653839	A	G	.	286	219	nonsynonymous SNV	PTEN	MSS	NM_000314:c.A137G:p.Y46C
HCC2998	chr10	89692905	G	A	rs121909229	172	157	nonsynonymous SNV	PTEN	MSS	NM_000314:c.G389A:p.R130Q
HCC2998	chr10	89720870	T	G	.	156	125	nonsynonymous SNV	PTEN	MSS	NM_000314:c.T1021G:p.F341V
HCC2998	chr10	105765362	T	G	.	97	95	nonsynonymous SNV	SLK	MSS	NM_014720:c.T2393G:p.F798C
HCC2998	chr10	121207709	C	A	.	62	62	nonsynonymous SNV	GRK5	MSS	NM_005308:c.C1341A:p.F447L
HCC2998	chr10	123278201	T	C	.	130	126	nonsynonymous SNV	FGFR2	MSS	NM_001144913:c.A1082G:p.Q361R
HCC2998	chr11	8494757	C	A	.	116	128	stopgain SNV	STK33	MSS	NM_001289061:c.G292T:p.E98X
HCC2998	chr11	8496385	T	A	.	151	149	nonsynonymous SNV	STK33	MSS	NM_001289061:c.A68T:p.D23V
HCC2998	chr11	17115855	T	G	.	67	70	nonsynonymous SNV	PIK3C2A	MSS	NM_002645:c.A4404C:p.E1468D
HCC2998	chr11	17122939	G	T	.	165	175	synonymous SNV	PIK3C2A	MSS	NM_002645:c.C3894A:p.V1298V
HCC2998	chr11	63672288	C	T	.	209	207	synonymous SNV	MARK2	MSS	NM_001163296:c.C1545T:p.S515S
HCC2998	chr11	65298125	A	C	.	70	102	nonsynonymous SNV	SCYL1	MSS	NM_001048218:c.A875C:p.K292T
HCC2998	chr11	65380716	A	C	.	51	95	nonsynonymous SNV	MAP3K11	MSS	NM_002419:c.T512G:p.L171R
HCC2998	chr11	77047211	C	A	.	50	51	nonsynonymous SNV	PAK1	MSS	NM_001128620:c.G1333T:p.V445F
HCC2998	chr11	77054927	A	C	.	194	181	nonsynonymous SNV	PAK1	MSS	NM_001128620:c.T935G:p.I312S
HCC2998	chr11	108115600	C	T	.	138	89	stopgain SNV	ATM	MSS	NM_000051:c.C748T:p.R250X
HCC2998	chr11	108115681	G	T	.	140	105	stopgain SNV	ATM	MSS	NM_000051:c.G829T:p.E277X
HCC2998	chr11	108150330	G	A	.	66	60	nonsynonymous SNV	ATM	MSS	NM_000051:c.G3397A:p.E1133K
HCC2998	chr11	108160347	C	A	.	142	33	nonsynonymous SNV	ATM	MSS	NM_000051:c.C4255A:p.L1419I
HCC2998	chr11	108160407	C	A	.	114	101	nonsynonymous SNV	ATM	MSS	NM_000051:c.C4315A:p.L1439I
HCC2998	chr11	111591721	G	C	.	166	142	nonsynonymous SNV	SIK2	MSS	NM_015191:c.G1879C:p.E627Q
HCC2998	chr11	113673918	C	A	.	104	76	stopgain SNV	USP28	MSS	NM_020886:c.G2824T:p.E942X
HCC2998	chr11	113683217	G	A	.	57	65	nonsynonymous SNV	USP28	MSS	NM_020886:c.C1753T:p.R585C
HCC2998	chr12	14805891	T	G	.	214	256	nonsynonymous SNV	GUCY2C	MSS	NM_004963:c.A1528C:p.K510Q
HCC2998	chr12	14813931	C	T	.	45	31	nonsynonymous SNV	GUCY2C	MSS	NM_004963:c.G1348A:p.A450T
HCC2998	chr12	18473940	A	C	.	65	54	nonsynonymous SNV	PIK3C2G	MSS	NM_001288772:c.A1182C:p.E394D
HCC2998	chr12	18534758	G	T	.	168	129	stopgain SNV	PIK3C2G	MSS	NM_004570:c.G1816T:p.E606X
HCC2998	chr12	25378562	C	T	rs121913527	165	137	nonsynonymous SNV	KRAS	MSS	NM_004985:c.G436A:p.A146T
HCC2998	chr12	40618984	G	T	.	158	131	nonsynonymous SNV	LRRK2	MSS	NM_198578:c.G51T:p.K17N
HCC2998	chr12	40629491	G	A	.	144	153	synonymous SNV	LRRK2	MSS	NM_198578:c.G411A:p.K137K
HCC2998	chr12	40692085	A	C	.	161	177	nonsynonymous SNV	LRRK2	MSS	NM_198578:c.A3137C:p.K1046T
HCC2998	chr12	40715978	G	T	.	101	54	nonsynonymous SNV	LRRK2	MSS	NM_198578:c.G5312T:p.R1771I
HCC2998	chr12	40758722	G	A	.	159	135	synonymous SNV	LRRK2	MSS	NM_198578:c.G7260A:p.Q2420Q
HCC2998	chr12	44166044	A	G	.	196	165	synonymous SNV	IRAK4	MSS	NM_016123:c.A369G:p.K123K
HCC2998	chr12	52312800	T	G	.	58	72	stopgain SNV	ACVRL1	MSS	NM_001077401:c.T1278G:p.Y426X
HCC2998	chr12	56346202	C	A	.	225	215	nonsynonymous SNV	DGKA	MSS	NM_001345:c.C1730A:p.S577Y
HCC2998	chr12	58144442	C	T	.	53	47	nonsynonymous SNV	CDK4	MSS	NM_000075:c.G629A:p.R210Q
HCC2998	chr12	66622063	G	A	.	0	231	nonsynonymous SNV	IRAK3	MSS	NM_001142523:c.G617A:p.R206Q
HCC2998	chr12	118639256	G	A	.	194	194	stopgain SNV	TAOK3	MSS	NM_016281:c.C832T:p.R278X
HCC2998	chr12	132380342	A	C	.	123	100	nonsynonymous SNV	ULK1	MSS	NM_003565:c.A219C:p.E73D
HCC2998	chr13	21555687	C	T	.	172	93	synonymous SNV	LATS2	MSS	NM_014572:c.G2583A:p.A861A
HCC2998	chr13	28611414	A	C	.	282	130	nonsynonymous SNV	FLT3	MSS	NM_004119:c.T1217G:p.F406C
HCC2998	chr13	28624315	A	C	.	119	181	nonsynonymous SNV	FLT3	MSS	NM_004119:c.T659G:p.V220G
HCC2998	chr13	28880826	C	T	.	183	77	synonymous SNV	FLT1	MSS	NM_002019:c.G3804A:p.S1268S
HCC2998	chr13	28908216	A	C	.	352	154	nonsynonymous SNV	FLT1	MSS	NM_002019:c.T2539G:p.F847V
HCC2998	chr13	29005320	C	A	.	296	124	nonsynonymous SNV	FLT1	MSS	NM_001159920:c.G941T:p.R314M
HCC2998	chr13	32906477	C	T	.	103	205	nonsynonymous SNV	BRCA2	MSS	NM_000059:c.C862T:p.P288S
HCC2998	chr13	32910943	G	T	.	114	185	nonsynonymous SNV	BRCA2	MSS	NM_000059:c.G2451T:p.K817N
HCC2998	chr13	32911435	A	C	.	154	259	nonsynonymous SNV	BRCA2	MSS	NM_000059:c.A2943C:p.K981N
HCC2998	chr13	32912021	G	A	.	86	142	nonsynonymous SNV	BRCA2	MSS	NM_000059:c.G3529A:p.D1177N
HCC2998	chr13	32914898	T	G	.	117	241	nonsynonymous SNV	BRCA2	MSS	NM_000059:c.T6406G:p.L2136V
HCC2998	chr13	32972674	G	A	rs28897761	129	218	nonsynonymous SNV	BRCA2	MSS	NM_000059:c.G10024A:p.E3342K
HCC2998	chr13	36686046	G	A	.	269	118	nonsynonymous SNV	DCLK1	MSS	NM_004734:c.C683T:p.S228L
HCC2998	chr13	37679085	G	T	.	290	147	nonsynonymous SNV	CSNK1A1L	MSS	NM_145203:c.C309A:p.F103L
HCC2998	chr13	48919244	G	T	rs121913296	162	90	stopgain SNV	RB1	MSS	NM_000321:c.G409T:p.E137X
HCC2998	chr13	52646124	T	C	.	264	105	nonsynonymous SNV	NEK5	MSS	NM_199289:c.A1880G:p.D627G
HCC2998	chr13	99127579	C	T	.	380	160	nonsynonymous SNV	STK24	MSS	NM_001286649:c.G307A:p.A103T
HCC2998	chr14	30068238	G	A	.	141	122	nonsynonymous SNV	PRKD1	MSS	NM_002742:c.C2161T:p.P721S
HCC2998	chr14	50952900	G	T	.	130	126	nonsynonymous SNV	MAP4K5	MSS	NM_006575:c.C179A:p.S60Y
HCC2998	chr14	78392242	A	G	.	110	119	nonsynonymous SNV	ADCK1	MSS	NM_001142545:c.A940G:p.T314A
HCC2998	chr14	91341557	C	A	.	93	93	nonsynonymous SNV	RPS6KA5	MSS	NM_004755:c.G1984T:p.D662Y
HCC2998	chr14	103915283	A	C	.	159	192	nonsynonymous SNV	MARK3	MSS	NM_001128918:c.A325C:p.I109L
HCC2998	chr14	103918266	G	A	.	230	237	nonsynonymous SNV	MARK3	MSS	NM_001128918:c.G358A:p.E120K
HCC2998	chr14	105239373	G	T	.	73	77	synonymous SNV	AKT1	MSS	NM_001014431:c.C1014A:p.V338V
HCC2998	chr15	40268998	-	GACGAC	.	0	179	nonframeshift insertion	EIF2AK4	MSS	NM_001013703:c.2202_2203insGACGAC:p.E734delinsEDD
HCC2998	chr15	40557004	G	T	.	241	224	nonsynonymous SNV	PAK6	MSS	NM_001276717:c.G18T:p.K6N
HCC2998	chr15	50940919	T	G	.	254	254	nonsynonymous SNV	TRPM7	MSS	NM_017672:c.A286C:p.N96H
HCC2998	chr15	52356613	G	T	.	115	90	nonsynonymous SNV	MAPK6	MSS	NM_002748:c.G1582T:p.D528Y
HCC2998	chr15	74920358	C	A	.	81	69	nonsynonymous SNV	CLK3	MSS	NM_001130028:c.C1534A:p.L512I
HCC2998	chr15	101586288	C	T	.	119	143	synonymous SNV	LRRK1	MSS	NM_024652:c.C3066T:p.F1022F
HCC2998	chr15	101595153	T	G	.	189	182	nonsynonymous SNV	LRRK1	MSS	NM_024652:c.T4057G:p.S1353A
HCC2998	chr16	2647236	G	A	.	150	103	nonsynonymous SNV	PDPK1	MSS	NM_031268:c.G1133A:p.R378Q
HCC2998	chr16	18840671	T	C	.	249	70	synonymous SNV	SMG1	MSS	NM_015092:c.A9540G:p.E3180E
HCC2998	chr16	18875142	C	T	.	154	121	synonymous SNV	SMG1	MSS	NM_015092:c.G3525A:p.P1175P
HCC2998	chr16	23640966	C	T	.	170	197	nonsynonymous SNV	PALB2	MSS	NM_024675:c.G2509A:p.E837K
HCC2998	chr16	23707299	G	T	.	57	33	nonsynonymous SNV	ERN2	MSS	NM_033266:c.C1670A:p.A557D
HCC2998	chr16	23716289	C	T	.	171	118	nonsynonymous SNV	ERN2	MSS	NM_033266:c.G913A:p.A305T
HCC2998	chr16	58200587	A	C	.	107	69	nonsynonymous SNV	CSNK2A2	MSS	NM_001896:c.T728G:p.L243R
HCC2998	chr16	68842729	G	T	.	80	89	nonsynonymous SNV	CDH1	MSS	NM_004360:c.G665T:p.R222I
HCC2998	chr16	74719432	C	T	.	259	208	nonsynonymous SNV	MLKL	MSS	NM_152649:c.G772A:p.E258K
HCC2998	chr17	3628236	C	T	.	100	78	nonsynonymous SNV	GSG2	MSS	NM_031965:c.C1007T:p.S336L
HCC2998	chr17	7578212	G	A	.	121	230	stopgain SNV	TP53	MSS	NM_000546:c.C637T:p.R213X
HCC2998	chr17	11998898	C	T	.	166	154	nonsynonymous SNV	MAP2K4	MSS	NM_003010:c.C400T:p.R134W
HCC2998	chr17	11998958	C	T	.	248	207	nonsynonymous SNV	MAP2K4	MSS	NM_003010:c.C460T:p.R154W
HCC2998	chr17	21215571	T	C	.	230	54	nonsynonymous SNV	MAP2K3	MSS	NM_002756:c.T805C:p.F269L
HCC2998	chr17	29550567	A	C	.	100	105	nonsynonymous SNV	NF1	MSS	NM_000267:c.A1827C:p.K609N
HCC2998	chr17	29701035	C	T	.	196	213	synonymous SNV	NF1	MSS	NM_000267:c.C8319T:p.I2773I
HCC2998	chr17	37881118	G	A	.	31	36	nonsynonymous SNV	ERBB2	MSS	NM_001289937:c.G2447A:p.R816H
HCC2998	chr17	56649434	A	G	.	114	71	nonsynonymous SNV	TEX14	MSS	NM_031272:c.T3565C:p.F1189L
HCC2998	chr17	60689763	G	A	.	182	158	nonsynonymous SNV	TLK2	MSS	NM_001284363:c.G1994A:p.R665Q
HCC2998	chr17	61712152	G	T	.	81	89	nonsynonymous SNV	MAP3K3	MSS	NM_203351:c.G210T:p.K70N
HCC2998	chr17	64684424	T	C	.	193	187	synonymous SNV	PRKCA	MSS	NM_002737:c.T691C:p.L231L
HCC2998	chr17	64728910	C	T	.	192	190	synonymous SNV	PRKCA	MSS	NM_002737:c.C1023T:p.F341F
HCC2998	chr17	80211108	C	T	.	187	174	nonsynonymous SNV	CSNK1D	MSS	NM_001893:c.G349A:p.E117K
HCC2998	chr18	18571282	C	A	.	60	76	nonsynonymous SNV	ROCK1	MSS	NM_005406:c.G1998T:p.K666N
HCC2998	chr18	18629123	C	A	.	216	214	nonsynonymous SNV	ROCK1	MSS	NM_005406:c.G344T:p.R115I
HCC2998	chr18	21046200	G	A	.	221	214	nonsynonymous SNV	RIOK3	MSS	NM_003831:c.G647A:p.R216Q
HCC2998	chr18	39609394	C	T	.	57	48	nonsynonymous SNV	PIK3C3	MSS	NM_002647:c.C1696T:p.R566C
HCC2998	chr18	48252480	C	T	.	142	131	synonymous SNV	MAPK4	MSS	NM_001292039:c.C369T:p.I123I
HCC2998	chr18	56204503	T	G	.	110	118	synonymous SNV	ALPK2	MSS	NM_052947:c.A2916C:p.T972T
HCC2998	chr19	15365013	G	A	.	53	57	nonsynonymous SNV	BRD4	MSS	NM_014299:c.C2108T:p.S703L
HCC2998	chr19	17945696	C	T	rs3213409	27	20	nonsynonymous SNV	JAK3	MSS	NM_000215:c.G2164A:p.V722I
HCC2998	chr19	42744190	A	C	.	173	143	nonsynonymous SNV	GSK3A	MSS	NM_019884:c.T388G:p.F130V
HCC2998	chr19	54387447	G	A	.	72	68	nonsynonymous SNV	PRKCG	MSS	NM_002739:c.G235A:p.E79K
HCC2998	chr20	2097768	G	T	.	195	179	nonsynonymous SNV	STK35	MSS	NM_080836:c.G1349T:p.R450I
HCC2998	chr20	9546658	A	G	.	97	96	nonsynonymous SNV	PAK7	MSS	NM_177990:c.T1364C:p.I455T
HCC2998	chr20	30407959	G	T	.	18	26	nonsynonymous SNV	MYLK2	MSS	NM_033118:c.G83T:p.R28I
HCC2998	chr20	30414500	C	T	.	221	58	synonymous SNV	MYLK2	MSS	NM_033118:c.C1065T:p.I355I
HCC2998	chr20	45315527	A	G	.	83	73	synonymous SNV	TP53RK	MSS	NM_033550:c.T627C:p.S209S
HCC2998	chr21	33296818	G	T	.	240	180	nonsynonymous SNV	HUNK	MSS	NM_014586:c.G300T:p.K100N
HCC2998	chr21	38884717	T	C	.	66	75	synonymous SNV	DYRK1A	MSS	NM_001396:c.T2175C:p.N725N
HCC2998	chr22	26063721	A	C	.	184	157	nonsynonymous SNV	ADRBK2	MSS	NM_005160:c.A457C:p.I153L
HCC2998	chr22	30035134	A	C	.	179	184	nonsynonymous SNV	NF2	MSS	NM_181828:c.A170C:p.K57T
HCC2998	chr22	31668547	T	G	.	51	50	nonsynonymous SNV	LIMK2	MSS	NM_001031801:c.T1352G:p.L451R
HCC2998	chrX	15560135	C	A	.	138	152	nonsynonymous SNV	BMX	MSS	NM_001721:c.C1425A:p.F475L
HCC2998	chrX	18646617	C	T	.	143	146	nonsynonymous SNV	CDKL5	MSS	NM_003159:c.C2623T:p.R875W
HCC2998	chrX	19390850	T	G	.	160	116	nonsynonymous SNV	MAP3K15	MSS	NM_001001671:c.A3029C:p.E1010A
HCC2998	chrX	19413226	T	G	.	184	231	nonsynonymous SNV	MAP3K15	MSS	NM_001001671:c.A2167C:p.K723Q
HCC2998	chrX	24546232	G	T	.	122	76	nonsynonymous SNV	PDK3	MSS	NM_001142386:c.G892T:p.D298Y
HCC2998	chrX	41437631	G	A	.	154	133	nonsynonymous SNV	CASK	MSS	NM_001126055:c.C1447T:p.R483W
HCC2998	chrX	41604824	G	A	.	137	117	synonymous SNV	CASK	MSS	NM_001126054:c.C309T:p.I103I
HCC2998	chrX	48771523	C	T	.	71	68	nonsynonymous SNV	PIM2	MSS	NM_006875:c.G821A:p.R274Q
HCC2998	chrX	54275600	C	A	.	105	138	stopgain SNV	WNK3	MSS	NM_001002838:c.G3181T:p.E1061X
HCC2998	chrX	54328244	C	A	.	128	161	stopgain SNV	WNK3	MSS	NM_001002838:c.G1138T:p.E380X
HCC2998	chrX	54337631	C	A	.	113	128	nonsynonymous SNV	WNK3	MSS	NM_001002838:c.G631T:p.D211Y
HCC2998	chrX	83351247	G	T	.	159	154	nonsynonymous SNV	RPS6KA6	MSS	NM_014496:c.C1926A:p.F642L
HCC2998	chrX	83362641	T	G	.	173	135	nonsynonymous SNV	RPS6KA6	MSS	NM_014496:c.A1101C:p.K367N
HCC2998	chrX	86877265	G	T	.	113	131	stopgain SNV	KLHL4	MSS	NM_019117:c.G979T:p.E327X
HCC2998	chrX	86877375	A	G	.	87	83	synonymous SNV	KLHL4	MSS	NM_019117:c.A1089G:p.E363E
HCC2998	chrX	100630219	C	T	.	191	158	synonymous SNV	BTK	MSS	NM_000061:c.G54A:p.K18K
HCC2998	chrX	105142687	A	C	.	181	129	synonymous SNV	NRK	MSS	NM_198465:c.A691C:p.R231R
HCC2998	chrX	105150443	G	A	.	190	168	synonymous SNV	NRK	MSS	NM_198465:c.G882A:p.T294T
HCC2998	chrX	107976926	C	A	.	125	159	nonsynonymous SNV	IRS4	MSS	NM_003604:c.G2649T:p.K883N
HCC2998	chrX	107978002	C	T	.	53	62	nonsynonymous SNV	IRS4	MSS	NM_003604:c.G1573A:p.E525K
HCC2998	chrX	108625403	G	T	.	179	166	nonsynonymous SNV	GUCY2F	MSS	NM_001522:c.C3094A:p.L1032I
HCC2998	chrX	108641870	G	T	.	144	137	nonsynonymous SNV	GUCY2F	MSS	NM_001522:c.C2183A:p.S728Y
HCC2998	chrX	108673542	G	A	.	68	73	synonymous SNV	GUCY2F	MSS	NM_001522:c.C1785T:p.F595F
HCC2998	chrX	108719163	-	ATA	.	160	152	nonframeshift insertion	GUCY2F	MSS	NM_001522:c.3_4insTAT:p.M1delinsIM
HCC2998	chrX	131202329	G	T	.	61	48	nonsynonymous SNV	MST4	MSS	NM_001042452:c.G417T:p.K139N
HCC2998	chrX	153049796	A	C	.	178	204	nonsynonymous SNV	SRPK3	MSS	NM_001170760:c.A1192C:p.N398H
HCC2998	chrX	153050271	G	A	.	90	67	nonsynonymous SNV	SRPK3	MSS	NM_001170760:c.G1312A:p.E438K
HCC2998	chrX	153278499	A	G	.	38	38	nonsynonymous SNV	IRAK1	MSS	NM_001025243:c.T1688C:p.V563A
HCT116	chr1	16475435	G	A	.	56	80	synonymous SNV	EPHA2	MSI	NM_004431:c.C261T:p.Y87Y
HCT116	chr1	20977047	G	A	.	102	96	nonsynonymous SNV	PINK1	MSI	NM_032409:c.G1609A:p.A537T
HCT116	chr1	32751237	C	T	.	82	81	nonsynonymous SNV	LCK	MSI	NM_001042771:c.C1450T:p.R484W
HCT116	chr1	43787319	G	A	.	7	14	nonsynonymous SNV	TIE1	MSI	NM_001253357:c.G3143A:p.R1048H
HCT116	chr1	45810647	C	T	.	41	44	synonymous SNV	TESK2	MSI	NM_007170:c.G1581A:p.R527R
HCT116	chr1	46500859	C	T	rs368394271	19	21	synonymous SNV	MAST2	MSI	NM_015112:c.C4518T:p.D1506D
HCT116	chr1	46543215	T	-	.	64	57	frameshift deletion	PIK3R3	MSI	NM_003629:c.286delA:p.M96fs
HCT116	chr1	65332696	G	A	.	115	123	synonymous SNV	JAK1	MSI	NM_002227:c.C843T:p.Y281Y
HCT116	chr1	84679971	A	G	.	135	122	nonsynonymous SNV	PRKACB	MSI	NM_001242862:c.A862G:p.T288A
HCT116	chr1	89270168	G	A	.	125	138	nonsynonymous SNV	PKN2	MSI	NM_006256:c.G1376A:p.R459Q
HCT116	chr1	92457838	C	T	.	88	81	synonymous SNV	BRDT	MSI	NM_001242807:c.C1944T:p.C648C
HCT116	chr1	156816490	T	C	.	47	41	nonsynonymous SNV	INSRR	MSI	NM_014215:c.A1631G:p.N544S
HCT116	chr1	162724579	G	A	.	90	88	nonsynonymous SNV	DDR2	MSI	NM_006182:c.G351A:p.M117I
HCT116	chr1	179084092	G	A	.	60	67	synonymous SNV	ABL2	MSI	NM_001136001:c.C1419T:p.V473V
HCT116	chr1	205129350	A	G	.	20	18	nonsynonymous SNV	DSTYK	MSI	NM_015375:c.T1997C:p.V666A
HCT116	chr1	205129365	C	-	.	15	19	frameshift deletion	DSTYK	MSI	NM_015375:c.1982delG:p.G661fs
HCT116	chr1	226924040	-	C	.	39	34	frameshift insertion	ITPKB	MSI	NM_002221:c.1120_1121insG:p.K374fs
HCT116	chr1	228509332	C	T	.	94	87	synonymous SNV	OBSCN	MSI	NM_001098623:c.C14790T:p.R4930R
HCT116	chr1	228556529	G	A	.	29	25	nonsynonymous SNV	OBSCN	MSI	NM_001098623:c.G19874A:p.G6625D
HCT116	chr1	228559450	G	-	.	48	42	frameshift deletion	OBSCN	MSI	NM_001098623:c.20971delG:p.G6991fs
HCT116	chr2	27657600	T	C	.	81	72	synonymous SNV	NRBP1	MSI	NM_013392:c.T537C:p.R179R
HCT116	chr2	102486855	A	T	.	44	44	nonsynonymous SNV	MAP4K4	MSI	NM_001242559:c.A2495T:p.E832V
HCT116	chr2	112777074	C	T	.	56	50	stopgain SNV	MERTK	MSI	NM_006343:c.C2164T:p.R722X
HCT116	chr2	128066200	A	G	.	118	106	nonsynonymous SNV	MAP3K2	MSI	NM_006609:c.T1595C:p.V532A
HCT116	chr2	148683686	A	-	.	0	160	frameshift deletion	ACVR2A	MSI	NM_001278580:c.979delA:p.K327fs
HCT116	chr2	174131371	G	-	.	26	25	frameshift deletion	ZAK	MSI	NM_016653:c.2296delG:p.G766fs
HCT116	chr2	179410231	T	-	.	102	107	frameshift deletion	TTN	MSI	NM_003319:c.68411delA:p.K22804fs
HCT116	chr2	179412602	G	T	.	104	68	nonsynonymous SNV	TTN	MSI	NM_003319:c.C66556A:p.L22186M
HCT116	chr2	179429413	G	A	.	47	57	nonsynonymous SNV	TTN	MSI	NM_003319:c.C54251T:p.A18084V
HCT116	chr2	179433527	C	T	.	89	93	nonsynonymous SNV	TTN	MSI	NM_003319:c.G50137A:p.G16713R
HCT116	chr2	179441135	C	T	.	53	46	nonsynonymous SNV	TTN	MSI	NM_003319:c.G42529A:p.G14177R
HCT116	chr2	179459079	T	C	.	58	64	nonsynonymous SNV	TTN	MSI	NM_003319:c.A30947G:p.D10316G
HCT116	chr2	179472752	G	C	.	39	55	nonsynonymous SNV	TTN	MSI	NM_003319:c.C25567G:p.L8523V
HCT116	chr2	179486701	T	-	.	61	56	frameshift deletion	TTN	MSI	NM_003319:c.17753delA:p.K5918fs
HCT116	chr2	203420130	A	-	.	70	64	frameshift deletion	BMPR2	MSI	NM_001204:c.1742delA:p.E581fs
HCT116	chr2	209106786	G	A	.	96	71	nonsynonymous SNV	IDH1	MSI	NM_001282386:c.C782T:p.S261L
HCT116	chr2	242438779	C	A	.	78	76	nonsynonymous SNV	STK25	MSI	NM_001271978:c.G478T:p.G160W
HCT116	chr3	27352463	C	T	.	88	68	nonsynonymous SNV	NEK10	MSI	NM_199347:c.G613A:p.V205I
HCT116	chr3	30691872	A	-	rs79375991	0	132	frameshift deletion	TGFBR2	MSI	NM_003242:c.374delA:p.E125fs
HCT116	chr3	37056000	C	A	rs121912956,rs63750198	0	114	stopgain SNV	MLH1	MSI	NM_001167619:c.C32A:p.S11X
HCT116	chr3	38284240	C	A	.	94	90	synonymous SNV	OXSR1	MSI	NM_005109:c.C1081A:p.R361R
HCT116	chr3	41266134	CTT	-	.	34	40	nonframeshift deletion	CTNNB1	MSI	NM_001098209:c.131_133del:p.44_45del
HCT116	chr3	49765697	-	A	.	51	23	stopgain SNV	IP6K1	MSI	NM_001006115:c.136_137insT:p.E46_N47delinsX
HCT116	chr3	123419195	G	A	.	116	122	synonymous SNV	MYLK	MSI	NM_053026:c.C2913T:p.N971N
HCT116	chr3	123427729	-	G	.	87	81	frameshift insertion	MYLK	MSI	NM_053026:c.1749_1750insC:p.P583fs
HCT116	chr3	123987776	C	T	.	33	29	nonsynonymous SNV	KALRN	MSI	NM_001024660:c.C637T:p.R213W
HCT116	chr3	130452859	A	G	.	97	99	nonsynonymous SNV	PIK3R4	MSI	NM_014602:c.T983C:p.M328T
HCT116	chr3	134911419	G	A	.	43	34	synonymous SNV	EPHB1	MSI	NM_004441:c.G1884A:p.G628G
HCT116	chr3	169988210	G	A	.	122	85	nonsynonymous SNV	PRKCI	MSI	NM_002740:c.G452A:p.R151H
HCT116	chr3	169998127	-	A	.	101	98	frameshift insertion	PRKCI	MSI	NM_002740:c.818_819insA:p.L273fs
HCT116	chr3	170800125	T	C	.	97	89	synonymous SNV	TNIK	MSI	NM_001161566:c.A2952G:p.Q984Q
HCT116	chr3	178952085	A	G	rs121913279	107	102	nonsynonymous SNV	PIK3CA	MSI	NM_006218:c.A3140G:p.H1047R
HCT116	chr3	195595419	T	C	.	17	12	nonsynonymous SNV	TNK2	MSI	NM_005781:c.A1705G:p.T569A
HCT116	chr3	195605202	A	G	.	78	69	nonsynonymous SNV	TNK2	MSI	NM_001010938:c.T1367C:p.M456T
HCT116	chr3	195622267	G	-	.	22	17	frameshift deletion	TNK2	MSI	NM_001010938:c.21delC:p.P7fs
HCT116	chr4	3009547	G	A	.	118	109	stopgain SNV	GRK4	MSI	NM_001004056:c.G432A:p.W144X
HCT116	chr4	3015470	A	-	.	84	78	frameshift deletion	GRK4	MSI	NM_001004056:c.560delA:p.Q187fs
HCT116	chr4	5458567	G	A	.	62	62	nonsynonymous SNV	STK32B	MSI	NM_018401:c.G700A:p.D234N
HCT116	chr4	48091839	G	A	.	36	18	nonsynonymous SNV	TXK	MSI	NM_003328:c.C712T:p.L238F
HCT116	chr4	48140733	C	T	.	76	82	synonymous SNV	TEC	MSI	NM_003215:c.G1761A:p.P587P
HCT116	chr4	66230873	T	-	.	72	63	frameshift deletion	EPHA5	MSI	NM_001281766:c.2035delA:p.R679fs
HCT116	chr4	66356363	-	G	.	67	13	frameshift insertion	EPHA5	MSI	NM_001281765:c.1134_1135insC:p.I378fs
HCT116	chr4	107156505	T	-	.	80	96	frameshift deletion	TBCK	MSI	NM_033115:c.1181delA:p.N394fs
HCT116	chr4	113353512	T	-	.	77	69	frameshift deletion	ALPK1	MSI	NM_001253884:c.2575delT:p.F859fs
HCT116	chr4	128816195	T	A	.	82	51	nonsynonymous SNV	PLK4	MSI	NM_001190799:c.T2554A:p.S852T
HCT116	chr5	1293551	C	T	.	44	45	nonsynonymous SNV	TERT	MSI	NM_001193376:c.G1450A:p.E484K
HCT116	chr5	1294089	G	A	.	22	14	synonymous SNV	TERT	MSI	NM_001193376:c.C912T:p.H304H
HCT116	chr5	179669587	C	T	.	107	74	nonsynonymous SNV	MAPK9	MSI	NM_002752:c.G857A:p.R286Q
HCT116	chr5	180043449	G	A	.	61	59	nonsynonymous SNV	FLT4	MSI	NM_002020:c.C3137T:p.S1046L
HCT116	chr6	43214482	C	T	.	83	103	synonymous SNV	TTBK1	MSI	NM_032538:c.C84T:p.Y28Y
HCT116	chr6	43221416	T	C	.	37	44	synonymous SNV	TTBK1	MSI	NM_032538:c.T441C:p.S147S
HCT116	chr6	80751897	A	-	.	46	45	frameshift deletion	TTK	MSI	NM_001166691:c.2549delA:p.E850fs
HCT116	chr6	117724428	G	A	.	34	31	nonsynonymous SNV	ROS1	MSI	NM_002944:c.C451T:p.P151S
HCT116	chr6	150004629	A	-	.	40	49	frameshift deletion	LATS1	MSI	NM_001270519:c.1596delT:p.F532fs
HCT116	chr6	161469776	A	-	.	66	56	frameshift deletion	MAP3K4	MSI	NM_005922:c.472delA:p.K158fs
HCT116	chr7	98581748	C	T	.	52	41	nonsynonymous SNV	TRRAP	MSI	NM_003496:c.C8980T:p.H2994Y
HCT116	chr7	98608765	A	G	.	73	95	nonsynonymous SNV	TRRAP	MSI	NM_003496:c.A10900G:p.T3634A
HCT116	chr7	116339848	T	-	.	110	102	frameshift deletion	MET	MSI	NM_000245:c.710delT:p.V237fs
HCT116	chr7	138252230	C	T	.	98	85	nonsynonymous SNV	TRIM24	MSI	NM_003852:c.C1433T:p.P478L
HCT116	chr7	139285224	G	A	.	100	92	nonsynonymous SNV	HIPK2	MSI	NM_001113239:c.C2293T:p.R765W
HCT116	chr7	140439741	A	G	.	86	54	synonymous SNV	BRAF	MSI	NM_004333:c.T1998C:p.I666I
HCT116	chr8	27297825	G	-	.	62	47	frameshift deletion	PTK2B	MSI	NM_173175:c.1906delG:p.G636fs
HCT116	chr8	38271209	G	A	.	35	22	synonymous SNV	FGFR1	MSI	NM_001174066:c.C2139T:p.P713P
HCT116	chr8	38274930	G	A	.	64	58	synonymous SNV	FGFR1	MSI	NM_001174066:c.C1290T:p.D430D
HCT116	chr8	38279368	G	A	.	36	34	nonsynonymous SNV	FGFR1	MSI	NM_001174066:c.C761T:p.A254V
HCT116	chr8	48736447	T	C	.	46	38	unknown	PRKDC	MSI	UNKNOWN
HCT116	chr8	48736536	T	C	.	51	25	unknown	PRKDC	MSI	UNKNOWN
HCT116	chr8	144804384	T	C	.	52	15	nonsynonymous SNV	MAPK15	MSI	NM_139021:c.T1598C:p.L533P
HCT116	chr8	144919855	C	T	.	21	40	nonsynonymous SNV	NRBP2	MSI	NM_178564:c.G913A:p.V305M
HCT116	chr8	145617819	C	A	.	26	45	nonsynonymous SNV	ADCK5	MSI	NM_174922:c.C1427A:p.P476H
HCT116	chr9	21994234	C	-	.	20	20	frameshift deletion	CDKN2A	MSI	NM_058195:c.97delG:p.E33fs
HCT116	chr9	32633025	T	-	.	99	109	frameshift deletion	TAF1L	MSI	NM_153809:c.2553delA:p.K851fs
HCT116	chr9	35609673	C	T	.	47	38	synonymous SNV	TESK1	MSI	NM_006285:c.C1815T:p.L605L
HCT116	chr9	90321162	A	G	.	43	40	nonsynonymous SNV	DAPK1	MSI	NM_001288729:c.A3176G:p.H1059R
HCT116	chr9	94495436	C	T	.	29	29	nonsynonymous SNV	ROR2	MSI	NM_004560:c.G905A:p.R302H
HCT116	chr9	96019305	C	-	.	20	11	frameshift deletion	WNK2	MSI	NM_001282394:c.2266delC:p.P756fs
HCT116	chr9	133738370	A	G	.	43	53	nonsynonymous SNV	ABL1	MSI	NM_005157:c.A770G:p.Y257C
HCT116	chr9	136918529	G	-	.	6	40	frameshift deletion	BRD3	MSI	NM_007371:c.71delC:p.P24fs
HCT116	chr10	8111444	C	A	.	43	31	synonymous SNV	GATA3	MSI	NM_001002295:c.C933A:p.A311A
HCT116	chr10	27454334	A	-	.	54	63	frameshift deletion	MASTL	MSI	NM_001172303:c.677delA:p.E226fs
HCT116	chr10	30748217	G	A	.	62	49	nonsynonymous SNV	MAP3K8	MSI	NM_001244134:c.G1060A:p.A354T
HCT116	chr10	105759643	C	T	.	156	52	synonymous SNV	SLK	MSI	NM_014720:c.C801T:p.D267D
HCT116	chr10	105762529	G	-	.	56	116	frameshift deletion	SLK	MSI	NM_014720:c.1593delG:p.L531fs
HCT116	chr10	123256164	G	A	.	145	79	nonsynonymous SNV	FGFR2	MSI	NM_001144914:c.C1409T:p.P470L
HCT116	chr11	46389593	T	C	.	71	79	synonymous SNV	DGKZ	MSI	NM_001199266:c.T408C:p.I136I
HCT116	chr11	65293800	G	A	.	80	70	nonsynonymous SNV	SCYL1	MSI	NM_001048218:c.G581A:p.G194D
HCT116	chr11	108150313	C	T	.	27	28	nonsynonymous SNV	ATM	MSI	NM_000051:c.C3380T:p.A1127V
HCT116	chr11	111558810	T	C	.	109	105	synonymous SNV	SIK2	MSI	NM_015191:c.T402C:p.H134H
HCT116	chr11	116730111	G	A	.	48	54	nonsynonymous SNV	SIK3	MSI	NM_001281749:c.C2491T:p.R831C
HCT116	chr11	116798007	G	A	.	141	114	nonsynonymous SNV	SIK3	MSI	NM_001281749:c.C544T:p.R182W
HCT116	chr12	970297	A	-	.	51	33	frameshift deletion	WNK1	MSI	NM_001184985:c.1739delA:p.E580fs
HCT116	chr12	1017928	C	-	.	27	11	frameshift deletion	WNK1	MSI	NM_014823:c.6375delC:p.N2125fs
HCT116	chr12	10787210	A	G	.	24	31	nonsynonymous SNV	STYK1	MSI	NM_018423:c.T8C:p.M3T
HCT116	chr12	25398281	C	T	rs112445441	73	88	nonsynonymous SNV	KRAS	MSI	NM_004985:c.G38A:p.G13D
HCT116	chr12	40637391	G	A	.	96	91	nonsynonymous SNV	LRRK2	MSI	NM_198578:c.G746A:p.C249Y
HCT116	chr12	56481853	C	T	.	43	48	stopgain SNV	ERBB3	MSI	NM_001982:c.C781T:p.Q261X
HCT116	chr12	120128117	G	A	.	36	45	nonsynonymous SNV	CIT	MSI	NM_007174:c.C5899T:p.R1967C
HCT116	chr12	121678328	TTTTT	-	.	7	62	frameshift deletion	CAMKK2	MSI	NM_001270486:c.1610_1614del:p.537_538del
HCT116	chr13	28578215	GA	-	.	68	45	frameshift deletion	FLT3	MSI	NM_004119:c.2955_2956del:p.985_986del
HCT116	chr13	28602367	C	T	.	102	77	synonymous SNV	FLT3	MSI	NM_004119:c.G2001A:p.Q667Q
HCT116	chr13	28626706	A	G	.	86	86	nonsynonymous SNV	FLT3	MSI	NM_004119:c.T590C:p.V197A
HCT116	chr13	32937354	-	A	.	89	99	frameshift insertion	BRCA2	MSI	NM_000059:c.8015_8016insA:p.I2672fs
HCT116	chr14	24808384	G	A	.	33	24	nonsynonymous SNV	RIPK3	MSI	NM_006871:c.C308T:p.S103L
HCT116	chr14	30093389	C	T	.	77	70	nonsynonymous SNV	PRKD1	MSI	NM_002742:c.G1874A:p.S625N
HCT116	chr14	50930796	T	-	.	126	107	frameshift deletion	MAP4K5	MSI	NM_006575:c.793delA:p.R265fs
HCT116	chr14	91389520	A	G	.	78	50	synonymous SNV	RPS6KA5	MSI	NM_004755:c.T639C:p.F213F
HCT116	chr14	103941357	C	T	.	43	39	nonsynonymous SNV	MARK3	MSI	NM_001128921:c.C1055T:p.A352V
HCT116	chr15	75094045	C	T	.	82	71	synonymous SNV	CSK	MSI	NM_004383:c.C897T:p.C299C
HCT116	chr15	88420176	A	G	.	97	118	nonsynonymous SNV	NTRK3	MSI	NM_001243101:c.T2444C:p.I815T
HCT116	chr15	90631825	G	A	.	105	92	synonymous SNV	IDH2	MSI	NM_001290114:c.C138T:p.G46G
HCT116	chr15	101555534	T	C	.	40	49	synonymous SNV	LRRK1	MSI	NM_024652:c.T1536C:p.N512N
HCT116	chr16	23690300	A	G	.	31	23	nonsynonymous SNV	PLK1	MSI	NM_005030:c.A47G:p.D16G
HCT116	chr16	24104123	A	-	.	89	66	frameshift deletion	PRKCB	MSI	NM_002738:c.541delA:p.K181fs
HCT116	chr16	28331469	C	T	.	23	31	nonsynonymous SNV	SBK1	MSI	NM_001024401:c.C502T:p.R168W
HCT116	chr16	31121413	C	T	.	121	150	nonsynonymous SNV	BCKDK	MSI	NM_001122957:c.C391T:p.R131C
HCT116	chr16	68835766	G	-	.	39	51	frameshift deletion	CDH1	MSI	NM_004360:c.357delG:p.V119fs
HCT116	chr16	74709591	TCTG	-	.	65	64	frameshift deletion	MLKL	MSI	NM_152649:c.1107_1110del:p.369_370del
HCT116	chr17	4798482	G	A	.	18	32	synonymous SNV	MINK1	MSI	NM_015716:c.G2919A:p.E973E
HCT116	chr17	7796831	C	T	.	35	35	nonsynonymous SNV	CHD3	MSI	NM_001005271:c.C914T:p.P305L
HCT116	chr17	7907086	G	T	.	10	17	nonsynonymous SNV	GUCY2D	MSI	NM_000180:c.G721T:p.A241S
HCT116	chr17	19705214	G	A	.	138	83	synonymous SNV	ULK2	MSI	NM_001142610:c.C1317T:p.S439S
HCT116	chr17	25909828	G	A	.	8	12	nonsynonymous SNV	KSR1	MSI	NM_014238:c.G266A:p.R89H
HCT116	chr17	29528154	C	A	.	114	81	nonsynonymous SNV	NF1	MSI	NM_000267:c.C1162A:p.P388T
HCT116	chr17	29553478	C	-	.	0	39	frameshift deletion	NF1	MSI	NM_000267:c.2027delC:p.T676fs
HCT116	chr17	48264847	G	A	rs72656314	177	114	stopgain SNV	COL1A1	MSI	NM_000088:c.C3421T:p.R1141X
HCT116	chr17	48266555	CT	-	.	47	23	frameshift deletion	COL1A1	MSI	NM_000088:c.2910_2911del:p.970_971del
HCT116	chr17	61770921	C	T	.	113	44	synonymous SNV	MAP3K3	MSI	NM_002401:c.C1665T:p.C555C
HCT116	chr17	61781061	G	T	.	115	52	synonymous SNV	STRADA	MSI	NM_001003786:c.C1083A:p.T361T
HCT116	chr19	1980013	C	G	.	24	19	nonsynonymous SNV	CSNK1G2	MSI	NM_001319:c.C1190G:p.T397S
HCT116	chr19	2041135	G	T	.	38	27	synonymous SNV	MKNK2	MSI	NM_017572:c.C1014A:p.S338S
HCT116	chr19	3653542	G	T	.	79	63	nonsynonymous SNV	PIP5K1C	MSI	NM_001195733:c.C667A:p.L223M
HCT116	chr19	3664899	G	A	.	12	13	nonsynonymous SNV	PIP5K1C	MSI	NM_001195733:c.C140T:p.T47M
HCT116	chr19	3779017	C	G	.	67	61	nonsynonymous SNV	MATK	MSI	NM_139354:c.G1047C:p.W349C
HCT116	chr19	18248064	T	C	.	19	20	nonsynonymous SNV	MAST3	MSI	NM_015016:c.T1901C:p.V634A
HCT116	chr19	19626101	G	A	.	99	94	nonsynonymous SNV	TSSK6	MSI	NM_032037:c.C136T:p.R46W
HCT116	chr19	41744385	C	-	.	79	73	frameshift deletion	AXL	MSI	NM_001278599:c.201delC:p.G67fs
HCT116	chr19	41758310	T	A	.	27	38	nonsynonymous SNV	AXL	MSI	NM_001278599:c.T962A:p.M321K
HCT116	chr19	49001621	C	A	.	32	36	nonsynonymous SNV	LMTK3	MSI	NM_001080434:c.G2792T:p.G931V
HCT116	chr19	54401734	C	T	.	96	111	nonsynonymous SNV	PRKCG	MSI	NM_002739:c.C1133T:p.A378V
HCT116	chr19	54403572	A	G	.	103	72	nonsynonymous SNV	PRKCG	MSI	NM_002739:c.A1367G:p.H456R
HCT116	chr19	55815036	C	-	.	39	19	frameshift deletion	BRSK1	MSI	NM_032430:c.1128delC:p.D376fs
HCT116	chr19	55823335	C	-	.	24	37	frameshift deletion	BRSK1	MSI	NM_032430:c.2236delC:p.P746fs
HCT116	chr19	57742627	C	A	.	8	13	nonsynonymous SNV	AURKC	MSI	NM_001015878:c.C11A:p.P4H
HCT116	chr21	43176720	C	T	.	55	48	nonsynonymous SNV	RIPK4	MSI	NM_020639:c.G439A:p.A147T
HCT116	chr22	29092920	A	G	.	55	63	nonsynonymous SNV	CHEK2	MSI	NM_007194:c.T1064C:p.L355P
HCT116	chr22	50704060	G	-	.	11	12	frameshift deletion	MAPK11	MSI	NM_002751:c.792delC:p.P264fs
HCT116	chrX	21627405	C	T	.	5	41	nonsynonymous SNV	CNKSR2	MSI	NM_001168647:c.C2272T:p.P758S
HCT116	chrX	105153801	G	A	.	0	63	nonsynonymous SNV	NRK	MSI	NM_198465:c.G2168A:p.R723H
HCT15	chr1	2075780	G	T	.	39	20	nonsynonymous SNV	PRKCZ	MSI	NM_001033581:c.G3T:p.M1I
HCT15	chr1	2105455	G	T	.	89	179	nonsynonymous SNV	PRKCZ	MSI	NM_001033581:c.G856T:p.V286L
HCT15	chr1	11272939	G	A	.	159	141	synonymous SNV	MTOR	MSI	NM_004958:c.C3312T:p.G1104G
HCT15	chr1	16458741	G	A	.	45	39	stopgain SNV	EPHA2	MSI	NM_004431:c.C2143T:p.Q715X
HCT15	chr1	16475436	T	C	.	69	78	nonsynonymous SNV	EPHA2	MSI	NM_004431:c.A260G:p.Y87C
HCT15	chr1	22924668	A	C	.	74	58	nonsynonymous SNV	EPHA8	MSI	NM_020526:c.A2141C:p.E714A
HCT15	chr1	22925339	C	T	.	46	32	synonymous SNV	EPHA8	MSI	NM_020526:c.C2187T:p.D729D
HCT15	chr1	27685077	G	T	.	26	25	nonsynonymous SNV	MAP3K6	MSI	NM_001297609:c.C2585A:p.P862Q
HCT15	chr1	32740382	C	A	.	11	19	synonymous SNV	LCK	MSI	NM_001042771:c.C150A:p.T50T
HCT15	chr1	32829417	C	A	.	49	14	nonsynonymous SNV	TSSK3	MSI	NM_052841:c.C367A:p.R123S
HCT15	chr1	36809506	G	A	.	66	66	nonsynonymous SNV	STK40	MSI	NM_001282546:c.C974T:p.A325V
HCT15	chr1	38227575	C	T	.	76	51	nonsynonymous SNV	EPHA10	MSI	NM_001099439:c.G352A:p.A118T
HCT15	chr1	43770762	T	C	.	64	51	nonsynonymous SNV	TIE1	MSI	NM_001253357:c.T164C:p.V55A
HCT15	chr1	43774777	G	A	.	19	25	nonsynonymous SNV	TIE1	MSI	NM_001253357:c.G1028A:p.R343H
HCT15	chr1	43788357	T	G	.	19	22	synonymous SNV	TIE1	MSI	NM_001253357:c.T3246G:p.T1082T
HCT15	chr1	45101238	G	A	.	29	29	nonsynonymous SNV	RNF220	MSI	NM_018150:c.G971A:p.R324Q
HCT15	chr1	57169805	A	G	.	112	83	nonsynonymous SNV	PRKAA2	MSI	NM_006252:c.A950G:p.Q317R
HCT15	chr1	64644333	G	T	.	64	40	nonsynonymous SNV	ROR1	MSI	NM_005012:c.G2609T:p.S870I
HCT15	chr1	151171484	C	A	.	60	55	synonymous SNV	PIP5K1A	MSI	NM_001135636:c.C12A:p.A4A
HCT15	chr1	151280238	G	T	.	51	33	nonsynonymous SNV	PI4KB	MSI	NM_001198774:c.C949A:p.L317M
HCT15	chr1	153652023	G	A	.	8	26	nonsynonymous SNV	NPR1	MSI	NM_000906:c.G439A:p.G147S
HCT15	chr1	155233111	C	A	.	50	56	nonsynonymous SNV	CLK2	MSI	NM_001294339:c.G714T:p.K238N
HCT15	chr1	155233748	G	A	.	98	89	nonsynonymous SNV	CLK2	MSI	NM_001294339:c.C626T:p.P209L
HCT15	chr1	155239439	T	C	.	28	29	nonsynonymous SNV	CLK2	MSI	NM_001294338:c.A239G:p.N80S
HCT15	chr1	155263090	A	G	.	21	16	synonymous SNV	PKLR	MSI	NM_000298:c.T1314C:p.F438F
HCT15	chr1	156811221	C	T	.	22	23	synonymous SNV	INSRR	MSI	NM_014215:c.G3627A:p.G1209G
HCT15	chr1	156821503	G	A	.	85	73	nonsynonymous SNV	INSRR	MSI	NM_014215:c.C1019T:p.A340V
HCT15	chr1	156844708	C	T	.	111	127	nonsynonymous SNV	NTRK1	MSI	NM_001012331:c.C1244T:p.A415V
HCT15	chr1	162748373	A	G	.	203	110	nonsynonymous SNV	DDR2	MSI	NM_006182:c.A2287G:p.K763E
HCT15	chr1	169824999	C	T	.	44	29	nonsynonymous SNV	SCYL3	MSI	NM_181093:c.G1412A:p.S471N
HCT15	chr1	179077420	C	A	.	48	42	nonsynonymous SNV	ABL2	MSI	NM_001168236:c.G2919T:p.Q973H
HCT15	chr1	204396853	C	T	.	73	64	nonsynonymous SNV	PIK3C2B	MSI	NM_002646:c.G4510A:p.V1504M
HCT15	chr1	204418415	G	T	.	26	23	synonymous SNV	PIK3C2B	MSI	NM_002646:c.C2244A:p.T748T
HCT15	chr1	205272702	G	T	.	47	52	nonsynonymous SNV	NUAK2	MSI	NM_030952:c.C1763A:p.P588H
HCT15	chr1	206650102	G	T	.	42	58	stopgain SNV	IKBKE	MSI	NM_001193321:c.G367T:p.G123X
HCT15	chr1	211840541	G	T	.	79	75	nonsynonymous SNV	NEK2	MSI	NM_001204182:c.C1018A:p.L340I
HCT15	chr1	211842656	C	T	.	75	87	nonsynonymous SNV	NEK2	MSI	NM_001204182:c.G784A:p.V262I
HCT15	chr1	213415019	C	A	.	37	31	nonsynonymous SNV	RPS6KC1	MSI	NM_001287220:c.C805A:p.L269I
HCT15	chr1	220805566	G	A	.	87	99	nonsynonymous SNV	MARK1	MSI	NM_001286128:c.G967A:p.A323T
HCT15	chr1	226829676	C	T	.	47	25	stopgain SNV	ITPKB	MSI	NM_002221:c.G2397A:p.W799X
HCT15	chr1	226924548	G	T	.	67	70	synonymous SNV	ITPKB	MSI	NM_002221:c.C612A:p.S204S
HCT15	chr1	228412343	G	T	.	52	59	nonsynonymous SNV	OBSCN	MSI	NM_001098623:c.G2837T:p.R946M
HCT15	chr1	228433342	G	T	.	53	60	nonsynonymous SNV	OBSCN	MSI	NM_001098623:c.G3710T:p.S1237I
HCT15	chr1	228482677	G	T	.	59	70	synonymous SNV	OBSCN	MSI	NM_001098623:c.G11592T:p.V3864V
HCT15	chr1	228494622	C	T	.	17	21	stopgain SNV	OBSCN	MSI	NM_001098623:c.C11947T:p.R3983X
HCT15	chr1	228505283	G	T	.	70	69	nonsynonymous SNV	OBSCN	MSI	NM_001098623:c.G13680T:p.E4560D
HCT15	chr1	228509525	G	A	.	73	70	nonsynonymous SNV	OBSCN	MSI	NM_001098623:c.G14983A:p.A4995T
HCT15	chr1	233489554	T	C	.	44	30	nonsynonymous SNV	KIAA1804	MSI	NM_032435:c.T988C:p.Y330H
HCT15	chr2	11332306	C	T	.	86	71	synonymous SNV	ROCK2	MSI	NM_004850:c.G4131A:p.R1377R
HCT15	chr2	12880539	T	G	.	46	33	synonymous SNV	TRIB2	MSI	NM_021643:c.T651G:p.A217A
HCT15	chr2	27656866	G	A	.	109	62	nonsynonymous SNV	NRBP1	MSI	NM_013392:c.G344A:p.R115H
HCT15	chr2	29541220	T	C	.	124	120	nonsynonymous SNV	ALK	MSI	NM_004304:c.A1597G:p.T533A
HCT15	chr2	37506998	G	A	.	60	61	nonsynonymous SNV	PRKD3	MSI	NM_005813:c.C1063T:p.R355W
HCT15	chr2	46203574	A	G	.	22	28	nonsynonymous SNV	PRKCE	MSI	NM_005400:c.A419G:p.K140R
HCT15	chr2	88870482	A	G	.	81	74	synonymous SNV	EIF2AK3	MSI	NM_004836:c.T2895C:p.D965D
HCT15	chr2	88874226	C	T	.	85	39	synonymous SNV	EIF2AK3	MSI	NM_004836:c.G2775A:p.V925V
HCT15	chr2	99189288	G	A	.	68	16	synonymous SNV	INPP4A	MSI	NM_001134225:c.G2529A:p.R843R
HCT15	chr2	102445989	T	C	.	36	35	synonymous SNV	MAP4K4	MSI	NM_001242559:c.T441C:p.H147H
HCT15	chr2	102481473	C	G	.	25	37	nonsynonymous SNV	MAP4K4	MSI	NM_004834:c.C1693G:p.Q565E
HCT15	chr2	148683686	A	-	.	0	186	frameshift deletion	ACVR2A	MSI	NM_001278580:c.979delA:p.K327fs
HCT15	chr2	168931652	G	A	.	104	118	synonymous SNV	STK39	MSI	NM_013233:c.C1179T:p.S393S
HCT15	chr2	168994652	C	T	.	90	35	nonsynonymous SNV	STK39	MSI	NM_013233:c.G920A:p.G307D
HCT15	chr2	179399145	T	C	.	90	77	nonsynonymous SNV	TTN	MSI	NM_003319:c.A75002G:p.E25001G
HCT15	chr2	179400358	T	C	.	49	51	nonsynonymous SNV	TTN	MSI	NM_003319:c.A73789G:p.K24597E
HCT15	chr2	179404402	T	G	.	101	107	nonsynonymous SNV	TTN	MSI	NM_003319:c.A71195C:p.N23732T
HCT15	chr2	179407961	C	A	.	84	74	stopgain SNV	TTN	MSI	NM_003319:c.G69544T:p.E23182X
HCT15	chr2	179410716	C	A	.	75	62	nonsynonymous SNV	TTN	MSI	NM_003319:c.G68052T:p.E22684D
HCT15	chr2	179418447	C	A	.	93	53	nonsynonymous SNV	TTN	MSI	NM_003319:c.G62090T:p.G20697V
HCT15	chr2	179418504	A	T	.	38	60	nonsynonymous SNV	TTN	MSI	NM_003319:c.T62033A:p.I20678N
HCT15	chr2	179418650	C	A	.	24	35	nonsynonymous SNV	TTN	MSI	NM_003319:c.G61993T:p.D20665Y
HCT15	chr2	179422941	T	C	.	87	76	nonsynonymous SNV	TTN	MSI	NM_003319:c.A59945G:p.K19982R
HCT15	chr2	179426714	T	C	.	74	68	nonsynonymous SNV	TTN	MSI	NM_003319:c.A56950G:p.T18984A
HCT15	chr2	179428319	C	T	.	56	50	nonsynonymous SNV	TTN	MSI	NM_003319:c.G55345A:p.V18449I
HCT15	chr2	179429379	T	C	.	68	57	synonymous SNV	TTN	MSI	NM_003319:c.A54285G:p.K18095K
HCT15	chr2	179440507	C	A	.	34	43	nonsynonymous SNV	TTN	MSI	NM_003319:c.G43157T:p.S14386I
HCT15	chr2	179451516	C	A	.	53	15	nonsynonymous SNV	TTN	MSI	NM_003319:c.G36917T:p.R12306M
HCT15	chr2	179452393	T	A	.	118	112	nonsynonymous SNV	TTN	MSI	NM_003319:c.A36448T:p.N12150Y
HCT15	chr2	179456385	T	G	.	105	100	nonsynonymous SNV	TTN	MSI	NM_003319:c.A32966C:p.N10989T
HCT15	chr2	179456869	C	T	.	34	35	nonsynonymous SNV	TTN	MSI	NM_003319:c.G32567A:p.S10856N
HCT15	chr2	179462781	T	C	.	102	87	nonsynonymous SNV	TTN	MSI	NM_003319:c.A29921G:p.K9974R
HCT15	chr2	179463745	G	A	.	52	54	nonsynonymous SNV	TTN	MSI	NM_003319:c.C29497T:p.R9833C
HCT15	chr2	179464145	A	T	.	45	46	nonsynonymous SNV	TTN	MSI	NM_003319:c.T29180A:p.I9727K
HCT15	chr2	179494130	G	T	.	95	80	synonymous SNV	TTN	MSI	NM_003319:c.C17127A:p.T5709T
HCT15	chr2	179516032	T	C	.	112	82	nonsynonymous SNV	TTN	MSI	NM_133378:c.A32261G:p.K10754R
HCT15	chr2	179574553	C	G	.	43	26	nonsynonymous SNV	TTN	MSI	NM_133378:c.G24761C:p.R8254T
HCT15	chr2	179576769	A	C	.	40	36	nonsynonymous SNV	TTN	MSI	NM_133378:c.T24056G:p.V8019G
HCT15	chr2	179577542	C	A	.	72	84	nonsynonymous SNV	TTN	MSI	NM_133378:c.G23478T:p.E7826D
HCT15	chr2	179584152	G	T	.	56	63	nonsynonymous SNV	TTN	MSI	NM_133378:c.C20233A:p.R6745S
HCT15	chr2	179592070	T	G	.	98	99	nonsynonymous SNV	TTN	MSI	NM_133378:c.A16290C:p.E5430D
HCT15	chr2	179593500	C	T	.	64	64	nonsynonymous SNV	TTN	MSI	NM_133378:c.G15421A:p.A5141T
HCT15	chr2	179596832	C	A	.	77	70	nonsynonymous SNV	TTN	MSI	NM_133378:c.G13132T:p.A4378S
HCT15	chr2	179603982	T	C	.	86	96	nonsynonymous SNV	TTN	MSI	NM_003319:c.A12889G:p.T4297A
HCT15	chr2	179605958	G	A	.	64	36	nonsynonymous SNV	TTN	MSI	NM_003319:c.C10913T:p.P3638L
HCT15	chr2	179614898	C	A	.	75	95	nonsynonymous SNV	TTN	MSI	NM_133379:c.G12229T:p.G4077C
HCT15	chr2	179615255	C	A	.	90	97	nonsynonymous SNV	TTN	MSI	NM_133379:c.G11872T:p.G3958C
HCT15	chr2	179629357	C	T	.	53	66	synonymous SNV	TTN	MSI	NM_003319:c.G9747A:p.T3249T
HCT15	chr2	179635302	C	A	.	98	77	nonsynonymous SNV	TTN	MSI	NM_003319:c.G8079T:p.Q2693H
HCT15	chr2	179640880	G	A	.	89	64	nonsynonymous SNV	TTN	MSI	NM_003319:c.C5573T:p.S1858L
HCT15	chr2	179641167	C	A	.	146	72	nonsynonymous SNV	TTN	MSI	NM_003319:c.G5286T:p.E1762D
HCT15	chr2	203383554	C	T	rs137852753	26	21	stopgain SNV	BMPR2	MSI	NM_001204:c.C631T:p.R211X
HCT15	chr2	209113217	C	T	.	83	84	nonsynonymous SNV	IDH1	MSI	NM_001282386:c.G290A:p.G97D
HCT15	chr2	209165733	C	T	.	125	118	nonsynonymous SNV	PIKFYVE	MSI	NM_152671:c.C832T:p.R278C
HCT15	chr2	209165786	C	T	.	110	125	synonymous SNV	PIKFYVE	MSI	NM_152671:c.C885T:p.N295N
HCT15	chr2	209216156	A	T	.	169	58	nonsynonymous SNV	PIKFYVE	MSI	NM_015040:c.A5692T:p.I1898F
HCT15	chr2	212488701	A	C	.	32	37	synonymous SNV	ERBB4	MSI	NM_001042599:c.T2148G:p.T716T
HCT15	chr2	212576794	G	T	.	67	68	nonsynonymous SNV	ERBB4	MSI	NM_001042599:c.C1105A:p.L369I
HCT15	chr2	219544666	G	A	.	34	31	synonymous SNV	STK36	MSI	NM_001243313:c.G999A:p.K333K
HCT15	chr2	220316384	G	T	.	20	19	nonsynonymous SNV	SPEG	MSI	NM_005876:c.G2295T:p.E765D
HCT15	chr2	220348049	C	A	.	42	47	nonsynonymous SNV	SPEG	MSI	NM_005876:c.C5864A:p.T1955N
HCT15	chr2	220355270	C	T	.	81	73	nonsynonymous SNV	SPEG	MSI	NM_005876:c.C9061T:p.R3021W
HCT15	chr2	234356957	G	A	.	66	65	nonsynonymous SNV	DGKD	MSI	NM_003648:c.G1418A:p.R473Q
HCT15	chr2	234359647	G	A	.	79	71	synonymous SNV	DGKD	MSI	NM_003648:c.G1986A:p.P662P
HCT15	chr3	9802445	C	T	.	38	25	nonsynonymous SNV	CAMK1	MSI	NM_003656:c.G640A:p.G214S
HCT15	chr3	27326410	G	A	.	61	78	nonsynonymous SNV	NEK10	MSI	NM_199347:c.C1832T:p.P611L
HCT15	chr3	30691872	A	-	rs79375991	63	55	frameshift deletion	TGFBR2	MSI	NM_003242:c.374delA:p.E125fs
HCT15	chr3	30715697	T	C	.	54	42	nonsynonymous SNV	TGFBR2	MSI	NM_003242:c.T1355C:p.L452P
HCT15	chr3	37045943	G	T	.	76	58	nonsynonymous SNV	MLH1	MSI	NM_000249:c.G358T:p.A120S
HCT15	chr3	38284255	A	T	.	100	96	nonsynonymous SNV	OXSR1	MSI	NM_005109:c.A1096T:p.I366L
HCT15	chr3	38287628	T	C	.	119	121	synonymous SNV	OXSR1	MSI	NM_005109:c.T1173C:p.H391H
HCT15	chr3	38520668	T	C	.	61	39	nonsynonymous SNV	ACVR2B	MSI	NM_001106:c.T716C:p.M239T
HCT15	chr3	41977303	G	T	.	65	23	nonsynonymous SNV	ULK4	MSI	NM_017886:c.C368A:p.S123Y
HCT15	chr3	48725855	C	A	.	24	31	nonsynonymous SNV	IP6K2	MSI	NM_001005909:c.G1132T:p.D378Y
HCT15	chr3	49899814	A	G	.	144	144	nonsynonymous SNV	CAMKV	MSI	NM_024046:c.T8C:p.F3S
HCT15	chr3	49936038	G	T	.	35	26	synonymous SNV	MST1R	MSI	NM_001244937:c.C1632A:p.G544G
HCT15	chr3	49940490	G	T	.	34	31	nonsynonymous SNV	MST1R	MSI	NM_001244937:c.C553A:p.R185S
HCT15	chr3	52777429	G	T	.	60	68	nonsynonymous SNV	NEK4	MSI	NM_001193533:c.C1676A:p.P559H
HCT15	chr3	53212455	G	T	.	10	22	nonsynonymous SNV	PRKCD	MSI	NM_212539:c.G17T:p.R6L
HCT15	chr3	53221386	G	A	.	47	49	synonymous SNV	PRKCD	MSI	NM_212539:c.G1383A:p.L461L
HCT15	chr3	58410530	C	A	.	37	34	nonsynonymous SNV	PXK	MSI	NM_001289101:c.C1169A:p.P390H
HCT15	chr3	97356854	A	G	.	50	60	synonymous SNV	EPHA6	MSI	NM_001278300:c.A888G:p.L296L
HCT15	chr3	97454942	C	T	.	134	128	synonymous SNV	EPHA6	MSI	NM_001080448:c.C3108T:p.T1036T
HCT15	chr3	123420309	T	C	.	54	49	nonsynonymous SNV	MYLK	MSI	NM_053026:c.A2231G:p.N744S
HCT15	chr3	124420904	C	A	.	79	45	synonymous SNV	KALRN	MSI	NM_007064:c.C2925A:p.A975A
HCT15	chr3	134670743	G	A	.	44	42	synonymous SNV	EPHB1	MSI	NM_004441:c.G654A:p.L218L
HCT15	chr3	138413637	C	T	.	93	87	nonsynonymous SNV	PIK3CB	MSI	NM_001256045:c.G419A:p.R140Q
HCT15	chr3	141497587	C	T	.	15	21	nonsynonymous SNV	GRK7	MSI	NM_139209:c.C461T:p.A154V
HCT15	chr3	142217446	T	C	.	81	88	nonsynonymous SNV	ATR	MSI	NM_001184:c.A5551G:p.I1851V
HCT15	chr3	142217605	T	C	.	173	38	nonsynonymous SNV	ATR	MSI	NM_001184:c.A5392G:p.T1798A
HCT15	chr3	142224026	A	G	.	80	99	synonymous SNV	ATR	MSI	NM_001184:c.T5151C:p.D1717D
HCT15	chr3	170825871	G	A	.	118	84	nonsynonymous SNV	TNIK	MSI	NM_001161565:c.C2113T:p.R705W
HCT15	chr3	170841435	C	T	.	80	76	synonymous SNV	TNIK	MSI	NM_001161565:c.G1818A:p.G606G
HCT15	chr3	170858278	C	A	.	11	14	nonsynonymous SNV	TNIK	MSI	NM_001161560:c.G1242T:p.E414D
HCT15	chr3	178936091	G	A	rs104886003	67	78	nonsynonymous SNV	PIK3CA	MSI	NM_006218:c.G1633A:p.E545K
HCT15	chr3	178936103	G	A	.	65	75	nonsynonymous SNV	PIK3CA	MSI	NM_006218:c.G1645A:p.D549N
HCT15	chr3	185146604	C	T	.	47	55	stopgain SNV	MAP3K13	MSI	NM_004721:c.C235T:p.Q79X
HCT15	chr3	185990049	C	T	.	81	66	nonsynonymous SNV	DGKG	MSI	NM_001080744:c.G994A:p.G332S
HCT15	chr3	195595572	-	GGTT	.	76	90	frameshift insertion	TNK2	MSI	NM_005781:c.1552_1553insAACC:p.Y518fs
HCT15	chr4	960922	C	T	.	26	12	stopgain SNV	DGKQ	MSI	NM_001347:c.G1215A:p.W405X
HCT15	chr4	1808938	C	A	.	29	16	synonymous SNV	FGFR3	MSI	NM_022965:c.C2034A:p.A678A
HCT15	chr4	48082010	C	A	.	152	60	nonsynonymous SNV	TXK	MSI	NM_003328:c.G1092T:p.K364N
HCT15	chr4	48114340	C	T	.	64	69	nonsynonymous SNV	TXK	MSI	NM_003328:c.G364A:p.A122T
HCT15	chr4	55564516	G	A	.	22	23	nonsynonymous SNV	KIT	MSI	NM_000222:c.G404A:p.R135H
HCT15	chr4	55948757	T	C	.	60	86	synonymous SNV	KDR	MSI	NM_002253:c.A3708G:p.V1236V
HCT15	chr4	55961787	G	A	.	79	85	nonsynonymous SNV	KDR	MSI	NM_002253:c.C2774T:p.S925F
HCT15	chr4	66197712	G	A	.	97	75	nonsynonymous SNV	EPHA5	MSI	NM_001281766:c.C2924T:p.A975V
HCT15	chr4	79832926	T	G	.	39	34	nonsynonymous SNV	BMP2K	MSI	NM_198892:c.T3225G:p.H1075Q
HCT15	chr4	82063998	G	T	.	81	91	nonsynonymous SNV	PRKG2	MSI	NM_001282481:c.C97A:p.L33I
HCT15	chr4	82125833	A	T	.	70	57	synonymous SNV	PRKG2	MSI	NM_001282485:c.T369A:p.A123A
HCT15	chr4	82126079	A	G	.	39	28	synonymous SNV	PRKG2	MSI	NM_001282485:c.T123C:p.D41D
HCT15	chr4	107154745	T	G	.	61	44	nonsynonymous SNV	TBCK	MSI	NM_033115:c.A1323C:p.Q441H
HCT15	chr4	107229953	C	T	.	93	65	synonymous SNV	TBCK	MSI	NM_001163435:c.G165A:p.Q55Q
HCT15	chr4	113298953	T	C	.	109	110	nonsynonymous SNV	ALPK1	MSI	NM_001102406:c.T20C:p.V7A
HCT15	chr4	113303614	T	C	.	41	39	nonsynonymous SNV	ALPK1	MSI	NM_001102406:c.T182C:p.F61S
HCT15	chr4	144387367	C	T	.	46	44	nonsynonymous SNV	GAB1	MSI	NM_002039:c.C1915T:p.P639S
HCT15	chr4	151000432	A	G	.	50	50	nonsynonymous SNV	DCLK2	MSI	NM_001040260:c.A253G:p.K85E
HCT15	chr4	153268106	G	T	.	114	126	synonymous SNV	FBXW7	MSI	NM_001013415:c.C348A:p.L116L
HCT15	chr4	170428891	C	A	.	99	113	nonsynonymous SNV	NEK1	MSI	NM_001199399:c.G1595T:p.R532M
HCT15	chr4	170498188	G	T	.	79	79	nonsynonymous SNV	NEK1	MSI	NM_001199400:c.C911A:p.P304H
HCT15	chr5	14280486	T	C	.	110	98	synonymous SNV	TRIO	MSI	NM_007118:c.T288C:p.H96H
HCT15	chr5	14461271	C	T	.	14	10	nonsynonymous SNV	TRIO	MSI	NM_007118:c.C5347T:p.R1783W
HCT15	chr5	40764668	C	T	.	37	43	synonymous SNV	PRKAA1	MSI	NM_006251:c.G1383A:p.Q461Q
HCT15	chr5	56189389	C	A	.	108	88	nonsynonymous SNV	MAP3K1	MSI	NM_005921:c.C4421A:p.P1474H
HCT15	chr5	57751900	C	T	.	106	49	nonsynonymous SNV	PLK2	MSI	NM_006622:c.G1337A:p.R446Q
HCT15	chr5	66460926	G	A	.	16	15	synonymous SNV	MAST4	MSI	NM_001290227:c.G5136A:p.S1712S
HCT15	chr5	67588105	C	T	.	41	47	nonsynonymous SNV	PIK3R1	MSI	NM_181504:c.C125T:p.P42L
HCT15	chr5	108207119	T	C	.	114	115	nonsynonymous SNV	FER	MSI	NM_005246:c.T719C:p.I240T
HCT15	chr5	110560284	G	A	.	47	37	nonsynonymous SNV	CAMK4	MSI	NM_001744:c.G103A:p.D35N
HCT15	chr5	110819889	G	A	.	33	17	nonsynonymous SNV	CAMK4	MSI	NM_001744:c.G1147A:p.A383T
HCT15	chr5	110820001	C	T	.	20	16	nonsynonymous SNV	CAMK4	MSI	NM_001744:c.C1259T:p.A420V
HCT15	chr5	112173471	G	T	.	78	78	nonsynonymous SNV	APC	MSI	NM_001127511:c.G2126T:p.R709M
HCT15	chr5	112174270	G	T	.	52	44	nonsynonymous SNV	APC	MSI	NM_001127511:c.G2925T:p.K975N
HCT15	chr5	112175539	C	-	.	0	98	frameshift deletion	APC	MSI	NM_001127511:c.4194delC:p.G1398fs
HCT15	chr5	112175974	G	T	.	63	72	nonsynonymous SNV	APC	MSI	NM_001127511:c.G4629T:p.K1543N
HCT15	chr5	112176628	A	G	.	51	49	nonsynonymous SNV	APC	MSI	NM_001127511:c.A5283G:p.I1761M
HCT15	chr5	112177787	C	T	.	60	70	stopgain SNV	APC	MSI	NM_001127511:c.C6442T:p.R2148X
HCT15	chr5	112178939	G	C	.	117	62	nonsynonymous SNV	APC	MSI	NM_001127511:c.G7594C:p.E2532Q
HCT15	chr5	112770512	G	A	.	40	37	stopgain SNV	TSSK1B	MSI	NM_032028:c.C25T:p.R9X
HCT15	chr5	171583634	C	T	.	18	27	synonymous SNV	STK10	MSI	NM_005990:c.G315A:p.K105K
HCT15	chr5	176518084	G	A	.	38	35	synonymous SNV	FGFR4	MSI	NM_022963:c.G582A:p.E194E
HCT15	chr5	176520345	T	A	.	66	76	nonsynonymous SNV	FGFR4	MSI	NM_022963:c.T1070A:p.I357N
HCT15	chr5	178039518	G	A	.	75	22	nonsynonymous SNV	CLK4	MSI	NM_020666:c.C950T:p.T317I
HCT15	chr5	178044385	A	G	.	116	115	synonymous SNV	CLK4	MSI	NM_020666:c.T435C:p.G145G
HCT15	chr5	179674448	C	A	.	77	66	nonsynonymous SNV	MAPK9	MSI	NM_001135044:c.G679T:p.G227C
HCT15	chr5	180055884	C	T	.	53	26	synonymous SNV	FLT4	MSI	NM_002020:c.G1101A:p.Q367Q
HCT15	chr5	180057100	G	T	.	15	11	nonsynonymous SNV	FLT4	MSI	NM_002020:c.C519A:p.S173R
HCT15	chr5	180057310	G	T	.	51	65	nonsynonymous SNV	FLT4	MSI	NM_002020:c.C428A:p.P143H
HCT15	chr6	2749518	A	G	.	97	103	nonsynonymous SNV	MYLK4	MSI	NM_001012418:c.T11C:p.V4A
HCT15	chr6	4041043	C	T	.	52	38	nonsynonymous SNV	PRPF4B	MSI	NM_003913:c.C1450T:p.R484W
HCT15	chr6	33703142	T	C	.	57	67	nonsynonymous SNV	IP6K3	MSI	NM_054111:c.A112G:p.T38A
HCT15	chr6	80749526	T	C	.	46	39	synonymous SNV	TTK	MSI	NM_001166691:c.T2241C:p.I747I
HCT15	chr6	94068041	G	T	.	131	32	synonymous SNV	EPHA7	MSI	NM_001288629:c.C921A:p.S307S
HCT15	chr6	111982995	C	T	.	40	51	nonsynonymous SNV	FYN	MSI	NM_153047:c.G1552A:p.E518K
HCT15	chr6	150001052	G	A	.	88	90	nonsynonymous SNV	LATS1	MSI	NM_004690:c.C2552T:p.T851I
HCT15	chr6	161470754	A	G	.	57	65	nonsynonymous SNV	MAP3K4	MSI	NM_005922:c.A1450G:p.I484V
HCT15	chr6	161507479	A	G	.	30	23	nonsynonymous SNV	MAP3K4	MSI	NM_005922:c.A2441G:p.K814R
HCT15	chr7	14758180	C	A	.	63	52	nonsynonymous SNV	DGKB	MSI	NM_004080:c.G453T:p.E151D
HCT15	chr7	23808649	A	C	.	97	131	nonsynonymous SNV	STK31	MSI	NM_001260504:c.A1383C:p.Q461H
HCT15	chr7	44281817	G	A	.	42	52	synonymous SNV	CAMK2B	MSI	NM_001220:c.C819T:p.C273C
HCT15	chr7	97821870	C	A	.	99	24	nonsynonymous SNV	LMTK2	MSI	NM_014916:c.C2093A:p.P698H
HCT15	chr7	98530973	G	T	.	59	38	nonsynonymous SNV	TRRAP	MSI	NM_001244580:c.G3962T:p.R1321M
HCT15	chr7	98548603	C	T	.	122	40	synonymous SNV	TRRAP	MSI	NM_003496:c.C5364T:p.S1788S
HCT15	chr7	98586478	G	A	.	71	50	synonymous SNV	TRRAP	MSI	NM_003496:c.G9405A:p.E3135E
HCT15	chr7	137308242	C	T	.	26	33	stopgain SNV	DGKI	MSI	NM_004717:c.G863A:p.W288X
HCT15	chr7	137341273	C	A	.	66	61	nonsynonymous SNV	DGKI	MSI	NM_004717:c.G620T:p.R207M
HCT15	chr7	139299042	G	-	.	68	65	frameshift deletion	HIPK2	MSI	NM_001113239:c.1899delC:p.P633fs
HCT15	chr7	141408609	C	A	.	64	46	synonymous SNV	WEE2	MSI	NM_001105558:c.C51A:p.S17S
HCT15	chr7	141422985	T	C	.	99	68	nonsynonymous SNV	WEE2	MSI	NM_001105558:c.T932C:p.F311S
HCT15	chr7	143091961	C	A	.	49	30	nonsynonymous SNV	EPHA1	MSI	NM_005232:c.G2292T:p.K764N
HCT15	chr7	143095114	T	G	.	119	87	nonsynonymous SNV	EPHA1	MSI	NM_005232:c.A1514C:p.E505A
HCT15	chr7	150752689	C	T	.	43	45	nonsynonymous SNV	CDK5	MSI	NM_001164410:c.G317A:p.G106E
HCT15	chr7	150754021	C	A	.	15	26	nonsynonymous SNV	CDK5	MSI	NM_001164410:c.G168T:p.K56N
HCT15	chr7	151164257	T	C	.	130	155	nonsynonymous SNV	RHEB	MSI	NM_005614:c.A503G:p.E168G
HCT15	chr7	151188035	C	T	.	39	40	nonsynonymous SNV	RHEB	MSI	NM_005614:c.G118A:p.E40K
HCT15	chr8	27289839	C	T	.	71	63	synonymous SNV	PTK2B	MSI	NM_173175:c.C948T:p.G316G
HCT15	chr8	27311778	G	A	.	102	82	synonymous SNV	PTK2B	MSI	NM_173175:c.G2577A:p.L859L
HCT15	chr8	38282161	C	A	.	116	109	nonsynonymous SNV	FGFR1	MSI	NM_001174066:c.G535T:p.A179S
HCT15	chr8	48695127	C	T	.	20	15	unknown	PRKDC	MSI	UNKNOWN
HCT15	chr8	48801763	A	G	.	34	51	unknown	PRKDC	MSI	UNKNOWN
HCT15	chr8	57025556	G	T	.	19	14	nonsynonymous SNV	MOS	MSI	NM_005372:c.C986A:p.P329Q
HCT15	chr8	144802405	C	A	.	13	13	nonsynonymous SNV	MAPK15	MSI	NM_139021:c.C727A:p.L243M
HCT15	chr9	5064974	T	C	.	126	107	nonsynonymous SNV	JAK2	MSI	NM_004972:c.T1148C:p.L383P
HCT15	chr9	21974596	A	G	.	26	23	synonymous SNV	CDKN2A	MSI	NM_058197:c.T231C:p.G77G
HCT15	chr9	27169615	C	A	.	94	59	nonsynonymous SNV	TEK	MSI	NM_001290078:c.C304A:p.L102M
HCT15	chr9	32630778	C	T	.	116	72	synonymous SNV	TAF1L	MSI	NM_153809:c.G4800A:p.K1600K
HCT15	chr9	32631263	T	A	.	116	55	nonsynonymous SNV	TAF1L	MSI	NM_153809:c.A4315T:p.I1439F
HCT15	chr9	32632317	A	G	.	143	69	synonymous SNV	TAF1L	MSI	NM_153809:c.T3261C:p.R1087R
HCT15	chr9	35800753	A	G	.	36	41	synonymous SNV	NPR2	MSI	NM_003995:c.A1266G:p.G422G
HCT15	chr9	35807383	T	C	.	57	84	synonymous SNV	NPR2	MSI	NM_003995:c.T2700C:p.F900F
HCT15	chr9	36633121	C	A	.	34	41	nonsynonymous SNV	MELK	MSI	NM_001256692:c.C365A:p.S122Y
HCT15	chr9	36633151	T	C	.	42	39	nonsynonymous SNV	MELK	MSI	NM_001256692:c.T395C:p.I132T
HCT15	chr9	71509406	C	T	.	140	132	nonsynonymous SNV	PIP5K1B	MSI	NM_001278253:c.C623T:p.T208M
HCT15	chr9	77390933	C	T	.	110	105	nonsynonymous SNV	TRPM6	MSI	NM_001177310:c.G3254A:p.R1085H
HCT15	chr9	77416908	C	T	.	53	28	nonsynonymous SNV	TRPM6	MSI	NM_001177310:c.G1900A:p.V634M
HCT15	chr9	77431586	T	G	.	115	28	nonsynonymous SNV	TRPM6	MSI	NM_001177310:c.A1292C:p.K431T
HCT15	chr9	90219936	A	G	.	35	21	nonsynonymous SNV	DAPK1	MSI	NM_001288729:c.A130G:p.I44V
HCT15	chr9	90272961	G	A	.	25	38	synonymous SNV	DAPK1	MSI	NM_001288729:c.G1842A:p.L614L
HCT15	chr9	94519786	C	A	.	94	88	nonsynonymous SNV	ROR2	MSI	NM_004560:c.G231T:p.Q77H
HCT15	chr9	96060226	G	A	.	55	36	nonsynonymous SNV	WNK2	MSI	NM_006648:c.G5800A:p.V1934M
HCT15	chr9	113563038	G	T	.	57	79	stopgain SNV	MUSK	MSI	NM_001166281:c.G2092T:p.E698X
HCT15	chr9	136913396	G	A	.	24	31	nonsynonymous SNV	BRD3	MSI	NM_007371:c.C895T:p.P299S
HCT15	chr9	136913458	C	T	.	27	30	nonsynonymous SNV	BRD3	MSI	NM_007371:c.G833A:p.R278Q
HCT15	chr10	6470236	C	A	.	43	58	nonsynonymous SNV	PRKCQ	MSI	NM_001242413:c.G1865T:p.S622I
HCT15	chr10	6540493	G	A	rs374126448	47	41	nonsynonymous SNV	PRKCQ	MSI	NM_001282645:c.C32T:p.T11M
HCT15	chr10	26414508	C	T	.	72	91	synonymous SNV	MYO3A	MSI	NM_017433:c.C2085T:p.N695N
HCT15	chr10	26463016	G	T	.	35	37	nonsynonymous SNV	MYO3A	MSI	NM_017433:c.G3823T:p.A1275S
HCT15	chr10	26463222	G	T	.	54	37	nonsynonymous SNV	MYO3A	MSI	NM_017433:c.G4029T:p.Q1343H
HCT15	chr10	43619256	T	C	.	44	51	nonsynonymous SNV	RET	MSI	NM_020630:c.T2939C:p.M980T
HCT15	chr10	53921674	C	T	.	40	38	synonymous SNV	PRKG1	MSI	NM_001098512:c.C982T:p.L328L
HCT15	chr10	53921708	C	T	.	43	37	nonsynonymous SNV	PRKG1	MSI	NM_001098512:c.C1016T:p.A339V
HCT15	chr10	99422676	A	G	.	91	79	nonsynonymous SNV	PI4K2A	MSI	NM_018425:c.A935G:p.D312G
HCT15	chr10	123239116	G	A	.	39	35	synonymous SNV	FGFR2	MSI	NM_001144915:c.C2103T:p.C701C
HCT15	chr10	123239422	G	A	.	62	65	synonymous SNV	FGFR2	MSI	NM_001144914:c.C2079T:p.Y693Y
HCT15	chr11	17190825	G	T	.	69	69	nonsynonymous SNV	PIK3C2A	MSI	NM_002645:c.C464A:p.P155H
HCT15	chr11	33308764	T	C	.	71	94	synonymous SNV	HIPK3	MSI	NM_001048200:c.T804C:p.R268R
HCT15	chr11	64129370	G	A	.	48	46	nonsynonymous SNV	RPS6KA4	MSI	NM_001006944:c.G802A:p.V268M
HCT15	chr11	64597016	G	A	.	12	19	synonymous SNV	CDC42BPG	MSI	NM_017525:c.C3894T:p.G1298G
HCT15	chr11	64601083	G	A	.	42	12	nonsynonymous SNV	CDC42BPG	MSI	NM_017525:c.C2614T:p.L872F
HCT15	chr11	67201898	G	A	.	56	34	synonymous SNV	RPS6KB2	MSI	NM_003952:c.G1098A:p.T366T
HCT15	chr11	108122714	G	T	.	107	100	nonsynonymous SNV	ATM	MSI	NM_000051:c.G1758T:p.E586D
HCT15	chr11	111572299	G	T	.	84	66	nonsynonymous SNV	SIK2	MSI	NM_015191:c.G727T:p.D243Y
HCT15	chr11	113270849	G	A	.	28	24	nonsynonymous SNV	ANKK1	MSI	NM_178510:c.G2158A:p.V720I
HCT15	chr11	116728647	G	A	.	116	87	synonymous SNV	SIK3	MSI	NM_001281749:c.C3210T:p.T1070T
HCT15	chr11	116732931	T	C	.	61	57	nonsynonymous SNV	SIK3	MSI	NM_001281749:c.A2072G:p.Q691R
HCT15	chr11	116767987	G	A	.	140	124	synonymous SNV	SIK3	MSI	NM_001281749:c.C663T:p.T221T
HCT15	chr12	994257	G	A	.	93	102	synonymous SNV	WNK1	MSI	NM_014823:c.G3546A:p.P1182P
HCT15	chr12	1009764	A	G	.	88	68	nonsynonymous SNV	WNK1	MSI	NM_014823:c.A5827G:p.S1943G
HCT15	chr12	4385274	T	G	.	78	85	nonsynonymous SNV	CCND2	MSI	NM_001759:c.T299G:p.L100R
HCT15	chr12	10783828	C	T	.	26	44	synonymous SNV	STYK1	MSI	NM_018423:c.G267A:p.E89E
HCT15	chr12	14772183	G	T	.	48	38	nonsynonymous SNV	GUCY2C	MSI	NM_004963:c.C2837A:p.T946K
HCT15	chr12	18439825	C	T	.	91	63	synonymous SNV	PIK3C2G	MSI	NM_001288772:c.C723T:p.S241S
HCT15	chr12	25398281	C	T	rs112445441	92	97	nonsynonymous SNV	KRAS	MSI	NM_004985:c.G38A:p.G13D
HCT15	chr12	40646716	C	A	.	113	33	nonsynonymous SNV	LRRK2	MSI	NM_198578:c.C1186A:p.P396T
HCT15	chr12	40668678	T	C	.	47	60	synonymous SNV	LRRK2	MSI	NM_198578:c.T1824C:p.S608S
HCT15	chr12	52307029	G	A	.	34	27	nonsynonymous SNV	ACVRL1	MSI	NM_001077401:c.G208A:p.G70R
HCT15	chr12	52377808	G	A	.	87	60	stopgain SNV	ACVR1B	MSI	NM_004302:c.G837A:p.W279X
HCT15	chr12	52377857	C	G	.	84	61	nonsynonymous SNV	ACVR1B	MSI	NM_004302:c.C886G:p.R296G
HCT15	chr12	52385722	T	A	.	88	65	nonsynonymous SNV	ACVR1B	MSI	NM_004302:c.T1337A:p.V446D
HCT15	chr12	53777104	C	A	.	16	38	nonsynonymous SNV	SP1	MSI	NM_001251825:c.C1229A:p.P410H
HCT15	chr12	53818684	G	T	.	12	24	nonsynonymous SNV	AMHR2	MSI	NM_001164690:c.G424T:p.G142C
HCT15	chr12	56330869	G	T	.	159	99	stopgain SNV	DGKA	MSI	NM_001345:c.G133T:p.G45X
HCT15	chr12	56347514	C	-	.	42	13	frameshift deletion	DGKA	MSI	NM_001345:c.2170delC:p.P724fs
HCT15	chr12	56478922	C	A	.	106	124	nonsynonymous SNV	ERBB3	MSI	NM_001005915:c.C378A:p.N126K
HCT15	chr12	56479090	T	C	.	88	102	synonymous SNV	ERBB3	MSI	NM_001005915:c.T546C:p.A182A
HCT15	chr12	56489535	G	A	.	143	168	nonsynonymous SNV	ERBB3	MSI	NM_001982:c.G2000A:p.R667H
HCT15	chr12	56495068	C	A	.	60	72	nonsynonymous SNV	ERBB3	MSI	NM_001982:c.C3425A:p.P1142H
HCT15	chr12	64868086	G	T	.	67	63	nonsynonymous SNV	TBK1	MSI	NM_013254:c.G617T:p.S206I
HCT15	chr12	106460634	A	C	.	45	39	nonsynonymous SNV	NUAK1	MSI	NM_014840:c.T1932G:p.D644E
HCT15	chr12	106461537	A	G	.	45	31	synonymous SNV	NUAK1	MSI	NM_014840:c.T1029C:p.A343A
HCT15	chr12	112303995	C	T	.	93	87	nonsynonymous SNV	MAPKAPK5	MSI	NM_003668:c.C146T:p.A49V
HCT15	chr12	117962758	G	T	.	15	16	synonymous SNV	KSR2	MSI	NM_173598:c.C2031A:p.A677A
HCT15	chr12	118598014	T	C	.	104	130	synonymous SNV	TAOK3	MSI	NM_016281:c.A2289G:p.R763R
HCT15	chr12	120128173	C	A	.	56	46	nonsynonymous SNV	CIT	MSI	NM_007174:c.G5843T:p.S1948I
HCT15	chr12	120135480	G	A	.	139	75	nonsynonymous SNV	CIT	MSI	NM_007174:c.C5740T:p.P1914S
HCT15	chr12	120146115	G	A	.	107	130	nonsynonymous SNV	CIT	MSI	NM_007174:c.C4954T:p.R1652W
HCT15	chr12	120214212	C	T	.	121	94	nonsynonymous SNV	CIT	MSI	NM_001206999:c.G1837A:p.A613T
HCT15	chr12	120241190	G	T	.	63	66	nonsynonymous SNV	CIT	MSI	NM_001206999:c.C1115A:p.P372H
HCT15	chr12	121678328	TT	-	.	76	57	frameshift deletion	CAMKK2	MSI	NM_001270486:c.1613_1614del:p.538_538del
HCT15	chr12	121698156	G	T	.	90	89	synonymous SNV	CAMKK2	MSI	NM_001270486:c.C762A:p.V254V
HCT15	chr12	132400662	G	A	.	18	22	synonymous SNV	ULK1	MSI	NM_003565:c.G1836A:p.L612L
HCT15	chr12	132403076	C	T	.	25	28	synonymous SNV	ULK1	MSI	NM_003565:c.C2361T:p.R787R
HCT15	chr13	21549154	G	A	.	79	65	nonsynonymous SNV	LATS2	MSI	NM_014572:c.C3122T:p.T1041I
HCT15	chr13	21557540	G	A	.	29	32	nonsynonymous SNV	LATS2	MSI	NM_014572:c.C2305T:p.R769W
HCT15	chr13	21557550	C	A	.	33	29	nonsynonymous SNV	LATS2	MSI	NM_014572:c.G2295T:p.E765D
HCT15	chr13	26927963	G	T	.	104	107	nonsynonymous SNV	CDK8	MSI	NM_001260:c.G402T:p.Q134H
HCT15	chr13	28609651	C	T	.	110	43	synonymous SNV	FLT3	MSI	NM_004119:c.G1578A:p.T526T
HCT15	chr13	28964090	A	G	.	112	107	synonymous SNV	FLT1	MSI	NM_001159920:c.T1812C:p.I604I
HCT15	chr13	29001971	C	T	.	76	75	synonymous SNV	FLT1	MSI	NM_001159920:c.G1194A:p.E398E
HCT15	chr13	32907075	C	T	.	47	61	nonsynonymous SNV	BRCA2	MSI	NM_000059:c.C1460T:p.A487V
HCT15	chr13	32912090	TG	-	rs80359391	50	52	frameshift deletion	BRCA2	MSI	NM_000059:c.3598_3599del:p.1200_1200del
HCT15	chr13	32912560	G	A	rs28897724	75	56	synonymous SNV	BRCA2	MSI	NM_000059:c.G4068A:p.L1356L
HCT15	chr13	32913837	A	-	rs80359509	37	42	frameshift deletion	BRCA2	MSI	NM_000059:c.5345delA:p.Q1782fs
HCT15	chr13	32944558	G	A	rs80359076	113	111	nonsynonymous SNV	BRCA2	MSI	NM_000059:c.G8351A:p.R2784Q
HCT15	chr13	36396868	G	T	.	98	90	nonsynonymous SNV	DCLK1	MSI	NM_001195415:c.C631A:p.L211M
HCT15	chr13	42729888	G	A	.	80	18	nonsynonymous SNV	DGKH	MSI	NM_001204505:c.G167A:p.C56Y
HCT15	chr13	52728306	A	T	.	65	84	synonymous SNV	NEK3	MSI	NM_001146099:c.T120A:p.S40S
HCT15	chr13	110434713	C	T	.	9	18	nonsynonymous SNV	IRS2	MSI	NM_003749:c.G3688A:p.G1230S
HCT15	chr13	110435005	G	A	.	24	23	synonymous SNV	IRS2	MSI	NM_003749:c.C3396T:p.G1132G
HCT15	chr13	110435140	G	A	.	22	13	synonymous SNV	IRS2	MSI	NM_003749:c.C3261T:p.I1087I
HCT15	chr13	110435575	C	T	.	16	25	synonymous SNV	IRS2	MSI	NM_003749:c.G2826A:p.A942A
HCT15	chr13	110436009	C	T	.	35	31	nonsynonymous SNV	IRS2	MSI	NM_003749:c.G2392A:p.V798I
HCT15	chr13	114321830	G	A	.	36	44	synonymous SNV	GRK1	MSI	NM_002929:c.G129A:p.P43P
HCT15	chr14	30108057	T	C	.	51	53	synonymous SNV	PRKD1	MSI	NM_002742:c.A750G:p.Q250Q
HCT15	chr14	35872562	G	T	.	39	23	nonsynonymous SNV	NFKBIA	MSI	NM_020529:c.C341A:p.P114Q
HCT15	chr14	50796878	T	A	.	132	113	nonsynonymous SNV	CDKL1	MSI	NM_004196:c.A991T:p.T331S
HCT15	chr14	64749641	G	T	.	84	31	synonymous SNV	ESR2	MSI	NM_001214902:c.C63A:p.S21S
HCT15	chr14	75374158	C	A	.	38	49	nonsynonymous SNV	RPS6KL1	MSI	NM_031464:c.G1519T:p.A507S
HCT15	chr14	93408175	C	A	.	59	67	nonsynonymous SNV	ITPK1	MSI	NM_001142593:c.G976T:p.A326S
HCT15	chr15	40257967	G	A	.	100	41	nonsynonymous SNV	EIF2AK4	MSI	NM_001013703:c.G940A:p.V314I
HCT15	chr15	40265207	G	A	.	109	91	nonsynonymous SNV	EIF2AK4	MSI	NM_001013703:c.G1652A:p.S551N
HCT15	chr15	40265836	C	T	.	89	111	synonymous SNV	EIF2AK4	MSI	NM_001013703:c.C1704T:p.N568N
HCT15	chr15	40308801	G	A	.	178	96	synonymous SNV	EIF2AK4	MSI	NM_001013703:c.G3858A:p.Q1286Q
HCT15	chr15	41799834	G	A	.	75	87	nonsynonymous SNV	LTK	MSI	NM_001135685:c.C1088T:p.P363L
HCT15	chr15	41870266	C	T	.	29	19	nonsynonymous SNV	TYRO3	MSI	NM_006293:c.C2465T:p.P822L
HCT15	chr15	50940891	C	A	.	115	87	nonsynonymous SNV	TRPM7	MSI	NM_017672:c.G314T:p.R105I
HCT15	chr15	64275749	C	T	.	27	35	synonymous SNV	DAPK2	MSI	NM_014326:c.G297A:p.V99V
HCT15	chr15	74917342	G	A	.	118	39	synonymous SNV	CLK3	MSI	NM_001130028:c.G1077A:p.K359K
HCT15	chr15	75091016	C	T	.	30	19	stopgain SNV	CSK	MSI	NM_004383:c.C76T:p.Q26X
HCT15	chr15	85383448	G	T	.	89	32	nonsynonymous SNV	ALPK3	MSI	NM_020778:c.G1544T:p.G515V
HCT15	chr15	85399748	G	T	.	43	29	nonsynonymous SNV	ALPK3	MSI	NM_020778:c.G2385T:p.Q795H
HCT15	chr15	85401355	C	T	.	27	29	nonsynonymous SNV	ALPK3	MSI	NM_020778:c.C3992T:p.S1331L
HCT15	chr15	85411392	C	T	.	58	58	nonsynonymous SNV	ALPK3	MSI	NM_020778:c.C5429T:p.A1810V
HCT15	chr15	99465549	A	G	.	133	120	nonsynonymous SNV	IGF1R	MSI	NM_000875:c.A2374G:p.N792D
HCT15	chr15	101592032	C	T	.	21	22	stopgain SNV	LRRK1	MSI	NM_024652:c.C3556T:p.Q1186X
HCT15	chr15	101605621	G	T	.	15	11	nonsynonymous SNV	LRRK1	MSI	NM_024652:c.G4979T:p.G1660V
HCT15	chr15	101606846	C	T	.	20	28	nonsynonymous SNV	LRRK1	MSI	NM_024652:c.C5770T:p.R1924C
HCT15	chr16	18849510	C	T	.	43	54	synonymous SNV	SMG1	MSI	NM_015092:c.G7239A:p.L2413L
HCT15	chr16	18893585	C	T	.	40	31	nonsynonymous SNV	SMG1	MSI	NM_015092:c.G1195A:p.A399T
HCT15	chr16	23634395	C	A	.	68	67	nonsynonymous SNV	PALB2	MSI	NM_024675:c.G2891T:p.G964V
HCT15	chr16	23641053	C	A	.	102	110	stopgain SNV	PALB2	MSI	NM_024675:c.G2422T:p.G808X
HCT15	chr16	23646397	G	A	rs45612837	84	54	synonymous SNV	PALB2	MSI	NM_024675:c.C1470T:p.P490P
HCT15	chr16	23646454	T	C	.	53	65	synonymous SNV	PALB2	MSI	NM_024675:c.A1413G:p.G471G
HCT15	chr16	23702742	A	G	.	20	26	nonsynonymous SNV	ERN2	MSI	NM_033266:c.T2525C:p.V842A
HCT15	chr16	24192201	G	A	.	36	39	synonymous SNV	PRKCB	MSI	NM_002738:c.G1485A:p.G495G
HCT15	chr16	24192241	G	A	.	27	17	nonsynonymous SNV	PRKCB	MSI	NM_002738:c.G1525A:p.A509T
HCT15	chr16	30129787	A	G	.	85	82	synonymous SNV	MAPK3	MSI	NM_001040056:c.T426C:p.H142H
HCT15	chr16	30767535	G	T	.	100	92	stopgain SNV	PHKG2	MSI	NM_000294:c.G589T:p.E197X
HCT15	chr17	4797476	A	T	.	41	39	nonsynonymous SNV	MINK1	MSI	NM_015716:c.A2567T:p.E856V
HCT15	chr17	7289966	C	T	.	23	13	synonymous SNV	TNK1	MSI	NM_001251902:c.C1224T:p.I408I
HCT15	chr17	7577559	G	A	rs28934573	52	48	nonsynonymous SNV	TP53	MSI	NM_000546:c.C722T:p.S241F
HCT15	chr17	7909891	C	T	.	55	73	nonsynonymous SNV	GUCY2D	MSI	NM_000180:c.C1237T:p.R413W
HCT15	chr17	7915893	G	T	.	29	28	nonsynonymous SNV	GUCY2D	MSI	NM_000180:c.G2082T:p.Q694H
HCT15	chr17	8731901	C	T	.	23	14	unknown	PIK3R6	MSI	UNKNOWN
HCT15	chr17	8791715	C	A	.	9	22	synonymous SNV	PIK3R5	MSI	NM_001251852:c.G231T:p.L77L
HCT15	chr17	12044530	C	A	.	110	54	nonsynonymous SNV	MAP2K4	MSI	NM_003010:c.C1153A:p.L385M
HCT15	chr17	19286145	C	A	.	44	52	nonsynonymous SNV	MAPK7	MSI	NM_139032:c.C1766A:p.P589H
HCT15	chr17	19689337	C	T	.	108	27	nonsynonymous SNV	ULK2	MSI	NM_001142610:c.G2164A:p.A722T
HCT15	chr17	25932597	G	A	.	10	16	stopgain SNV	KSR1	MSI	NM_014238:c.G1407A:p.W469X
HCT15	chr17	25944354	C	T	.	12	10	stopgain SNV	KSR1	MSI	NM_014238:c.C2182T:p.Q728X
HCT15	chr17	27064701	A	G	.	24	28	nonsynonymous SNV	NEK8	MSI	NM_178170:c.A836G:p.K279R
HCT15	chr17	27857448	G	A	.	45	25	synonymous SNV	TAOK1	MSI	NM_025142:c.G1728A:p.K576K
HCT15	chr17	29486044	C	A	rs199474726	86	95	nonsynonymous SNV	NF1	MSI	NM_000267:c.C221A:p.A74D
HCT15	chr17	29677308	C	T	.	110	92	nonsynonymous SNV	NF1	MSI	NM_000267:c.C7366T:p.P2456S
HCT15	chr17	41243979	G	T	.	66	71	nonsynonymous SNV	BRCA1	MSI	NM_007297:c.C3428A:p.P1143H
HCT15	chr17	41245560	C	T	.	92	124	nonsynonymous SNV	BRCA1	MSI	NM_007297:c.G1847A:p.S616N
HCT15	chr17	41251835	C	T	.	59	48	synonymous SNV	BRCA1	MSI	NM_007297:c.G363A:p.K121K
HCT15	chr17	64770184	A	C	.	195	39	nonsynonymous SNV	PRKCA	MSI	NM_002737:c.A1604C:p.Q535P
HCT15	chr17	74383537	G	T	.	28	34	nonsynonymous SNV	SPHK1	MSI	NM_001142602:c.G1025T:p.G342V
HCT15	chr17	74383604	T	C	.	17	16	synonymous SNV	SPHK1	MSI	NM_001142602:c.T1092C:p.G364G
HCT15	chr17	79094604	G	A	.	17	11	synonymous SNV	AATK	MSI	NM_004920:c.C2823T:p.S941S
HCT15	chr17	79094689	C	T	.	22	12	nonsynonymous SNV	AATK	MSI	NM_004920:c.G2738A:p.G913D
HCT15	chr17	80223642	G	A	.	84	42	nonsynonymous SNV	CSNK1D	MSI	NM_001893:c.C107T:p.A36V
HCT15	chr18	18650494	T	A	.	41	22	nonsynonymous SNV	ROCK1	MSI	NM_005406:c.A174T:p.R58S
HCT15	chr18	48255789	G	A	.	49	20	stopgain SNV	MAPK4	MSI	NM_001292039:c.G696A:p.W232X
HCT15	chr18	56203122	C	A	.	68	90	nonsynonymous SNV	ALPK2	MSI	NM_052947:c.G4297T:p.G1433W
HCT15	chr18	56246327	T	C	.	150	55	nonsynonymous SNV	ALPK2	MSI	NM_052947:c.A1681G:p.T561A
HCT15	chr18	59919949	C	T	.	74	40	nonsynonymous SNV	KIAA1468	MSI	NM_020854:c.C1786T:p.R596C
HCT15	chr18	59925754	T	A	.	161	70	nonsynonymous SNV	KIAA1468	MSI	NM_020854:c.T2047A:p.L683M
HCT15	chr19	1979933	G	T	.	10	10	nonsynonymous SNV	CSNK1G2	MSI	NM_001319:c.G1110T:p.E370D
HCT15	chr19	7126647	C	A	.	41	56	synonymous SNV	INSR	MSI	NM_001079817:c.G2925T:p.P975P
HCT15	chr19	7174706	C	A	.	75	64	nonsynonymous SNV	INSR	MSI	NM_000208:c.G1011T:p.K337N
HCT15	chr19	7184528	A	G	.	14	15	nonsynonymous SNV	INSR	MSI	NM_000208:c.T773C:p.F258S
HCT15	chr19	7975348	G	A	.	20	26	nonsynonymous SNV	MAP2K7	MSI	NM_001297556:c.G458A:p.R153H
HCT15	chr19	7975919	G	A	.	122	139	nonsynonymous SNV	MAP2K7	MSI	NM_001297556:c.G730A:p.V244I
HCT15	chr19	7976336	G	T	.	32	30	stopgain SNV	MAP2K7	MSI	NM_001297556:c.G973T:p.G325X
HCT15	chr19	10475393	C	T	.	18	18	nonsynonymous SNV	TYK2	MSI	NM_003331:c.G1264A:p.G422S
HCT15	chr19	12984760	C	A	.	76	61	synonymous SNV	MAST1	MSI	NM_014975:c.C3789A:p.R1263R
HCT15	chr19	15367974	T	C	.	58	58	nonsynonymous SNV	BRD4	MSI	NM_014299:c.A1352G:p.E451G
HCT15	chr19	17942128	C	T	.	63	26	nonsynonymous SNV	JAK3	MSI	NM_000215:c.G2887A:p.V963I
HCT15	chr19	18278088	C	T	.	73	73	synonymous SNV	PIK3R2	MSI	NM_005027:c.C1708T:p.L570L
HCT15	chr19	39664497	C	T	.	21	46	synonymous SNV	PAK4	MSI	NM_001014834:c.C486T:p.G162G
HCT15	chr19	40316714	G	A	.	26	35	stopgain SNV	DYRK1B	MSI	NM_004714:c.C1531T:p.Q511X
HCT15	chr19	41206219	T	C	.	66	70	nonsynonymous SNV	ADCK4	MSI	NM_001142555:c.A908G:p.N303S
HCT15	chr19	42744225	G	T	.	59	47	nonsynonymous SNV	GSK3A	MSI	NM_019884:c.C353A:p.A118D
HCT15	chr19	49013295	G	A	.	80	18	stopgain SNV	LMTK3	MSI	NM_001080434:c.C433T:p.Q145X
HCT15	chr19	49129312	C	T	.	46	36	synonymous SNV	SPHK2	MSI	NM_001204160:c.C96T:p.T32T
HCT15	chr19	49132104	A	T	.	16	27	nonsynonymous SNV	SPHK2	MSI	NM_001204160:c.A931T:p.S311C
HCT15	chr19	49132830	C	T	.	41	51	nonsynonymous SNV	SPHK2	MSI	NM_001204160:c.C1657T:p.R553C
HCT15	chr19	54403697	C	T	.	73	63	synonymous SNV	PRKCG	MSI	NM_002739:c.C1398T:p.I466I
HCT15	chr20	2083704	C	T	.	45	16	synonymous SNV	STK35	MSI	NM_080836:c.C585T:p.G195G
HCT15	chr20	9523299	C	T	.	94	79	synonymous SNV	PAK7	MSI	NM_177990:c.G1938A:p.E646E
HCT15	chr20	36012607	C	T	.	33	10	synonymous SNV	SRC	MSI	NM_005417:c.C51T:p.S17S
HCT15	chr20	42204991	G	T	.	20	17	nonsynonymous SNV	SGK2	MSI	NM_016276:c.G1001T:p.R334M
HCT15	chr20	43610556	C	A	.	83	60	nonsynonymous SNV	STK4	MSI	NM_006282:c.C332A:p.S111Y
HCT15	chr20	43625896	G	A	.	104	100	synonymous SNV	STK4	MSI	NM_006282:c.G780A:p.Q260Q
HCT15	chr20	54945572	G	A	.	59	57	nonsynonymous SNV	AURKA	MSI	NM_003600:c.C998T:p.T333I
HCT15	chr20	54963226	A	G	.	72	71	nonsynonymous SNV	AURKA	MSI	NM_003600:c.T28C:p.S10P
HCT15	chr20	62160907	G	A	.	18	33	synonymous SNV	PTK6	MSI	NM_005975:c.C1338T:p.S446S
HCT15	chr20	62165013	C	T	.	58	64	synonymous SNV	PTK6	MSI	NM_005975:c.G561A:p.P187P
HCT15	chr21	43166886	T	A	.	100	27	nonsynonymous SNV	RIPK4	MSI	NM_020639:c.A719T:p.H240L
HCT15	chr21	43187079	A	G	.	36	34	synonymous SNV	RIPK4	MSI	NM_020639:c.T123C:p.H41H
HCT15	chr21	44838958	C	A	.	17	21	nonsynonymous SNV	SIK1	MSI	NM_173354:c.G1405T:p.G469C
HCT15	chr22	19119876	C	T	.	31	43	nonsynonymous SNV	TSSK2	MSI	NM_053006:c.C964T:p.R322W
HCT15	chr22	21081601	C	A	.	62	55	nonsynonymous SNV	PI4KA	MSI	NM_002650:c.G1114T:p.G372C
HCT15	chr22	21082115	G	A	.	92	91	nonsynonymous SNV	PI4KA	MSI	NM_002650:c.C976T:p.R326C
HCT15	chr22	21106020	C	T	.	93	91	nonsynonymous SNV	PI4KA	MSI	NM_058004:c.G3011A:p.G1004E
HCT15	chr22	21153426	A	G	.	110	92	synonymous SNV	PI4KA	MSI	NM_058004:c.T1959C:p.D653D
HCT15	chr22	29107949	G	T	.	97	95	nonsynonymous SNV	CHEK2	MSI	NM_007194:c.C740A:p.A247D
HCT15	chr22	29121242	G	A	rs137853007	104	104	nonsynonymous SNV	CHEK2	MSI	NM_007194:c.C433T:p.R145W
HCT15	chr22	31654313	C	A	.	28	24	stopgain SNV	LIMK2	MSI	NM_001031801:c.C90A:p.Y30X
HCT15	chr22	38696011	C	A	.	77	68	nonsynonymous SNV	CSNK1E	MSI	NM_001894:c.G625T:p.G209C
HCT15	chr22	50356737	G	A	.	26	19	nonsynonymous SNV	PIM3	MSI	NM_001001852:c.G943A:p.D315N
HCT15	chr22	50703887	C	A	.	94	93	nonsynonymous SNV	MAPK11	MSI	NM_002751:c.G878T:p.S293I
HCT15	chrX	15555268	C	T	.	0	46	synonymous SNV	BMX	MSI	NM_001721:c.C1234T:p.L412L
HCT15	chrX	15568114	G	A	.	0	25	stopgain SNV	BMX	MSI	NM_001721:c.G1947A:p.W649X
HCT15	chrX	18598070	A	G	.	0	83	nonsynonymous SNV	CDKL5	MSI	NM_003159:c.A385G:p.N129D
HCT15	chrX	20193296	G	A	.	0	87	nonsynonymous SNV	RPS6KA3	MSI	NM_004586:c.C1213T:p.H405Y
HCT15	chrX	21609298	T	C	.	0	68	nonsynonymous SNV	CNKSR2	MSI	NM_001168647:c.T1726C:p.Y576H
HCT15	chrX	54224972	G	T	.	0	44	nonsynonymous SNV	WNK3	MSI	NM_001002838:c.C5017A:p.P1673T
HCT15	chrX	107976289	C	T	.	0	43	nonsynonymous SNV	IRS4	MSI	NM_003604:c.G3286A:p.A1096T
HCT15	chrX	107978532	C	T	.	0	16	nonsynonymous SNV	IRS4	MSI	NM_003604:c.G1043A:p.G348D
HCT15	chrX	110459743	A	G	.	0	98	nonsynonymous SNV	PAK3	MSI	NM_001128167:c.A1502G:p.E501G
HT29	chr1	22921753	G	A	.	121	68	stopgain SNV	EPHA8	MSS	NM_020526:c.G1634A:p.W545X
HT29	chr1	91967356	-	A	.	110	74	frameshift insertion	CDC7	MSS	NM_001134419:c.83_84insA:p.L28fs
HT29	chr1	155265064	C	G	.	49	16	nonsynonymous SNV	PKLR	MSS	NM_000298:c.G537C:p.K179N
HT29	chr1	228475862	G	C	.	99	53	nonsynonymous SNV	OBSCN	MSS	NM_001098623:c.G9912C:p.E3304D
HT29	chr2	46313421	C	T	.	66	135	synonymous SNV	PRKCE	MSS	NM_005400:c.C1512T:p.F504F
HT29	chr2	179443369	G	A	.	79	42	synonymous SNV	TTN	MSS	NM_003319:c.C41103T:p.D13701D
HT29	chr2	179497976	G	A	.	92	53	nonsynonymous SNV	TTN	MSS	NM_003319:c.C15829T:p.L5277F
HT29	chr2	179605947	C	T	.	56	104	nonsynonymous SNV	TTN	MSS	NM_003319:c.G10924A:p.D3642N
HT29	chr2	220312718	C	T	.	46	26	nonsynonymous SNV	SPEG	MSS	NM_005876:c.C838T:p.R280C
HT29	chr3	58385029	C	T	.	95	55	nonsynonymous SNV	PXK	MSS	NM_001289101:c.C695T:p.A232V
HT29	chr3	134884881	G	A	.	169	87	nonsynonymous SNV	EPHB1	MSS	NM_004441:c.G1657A:p.V553I
HT29	chr3	169953024	C	T	.	199	45	synonymous SNV	PRKCI	MSS	NM_002740:c.C108T:p.I36I
HT29	chr4	3030973	G	T	.	180	90	nonsynonymous SNV	GRK4	MSS	NM_001004056:c.G1010T:p.W337L
HT29	chr5	112173848	G	T	.	162	85	stopgain SNV	APC	MSS	NM_001127511:c.G2503T:p.E835X
HT29	chr5	112175951	-	A	.	66	103	frameshift insertion	APC	MSS	NM_001127511:c.4606_4607insA:p.E1536fs
HT29	chr6	149982965	T	G	.	101	94	nonsynonymous SNV	LATS1	MSS	NM_004690:c.A3293C:p.E1098A
HT29	chr7	97822060	G	C	.	70	90	synonymous SNV	LMTK2	MSS	NM_014916:c.G2283C:p.T761T
HT29	chr7	138263991	A	G	.	214	64	nonsynonymous SNV	TRIM24	MSS	NM_003852:c.A2197G:p.S733G
HT29	chr7	140453136	A	T	rs113488022	94	37	nonsynonymous SNV	BRAF	MSS	NM_004333:c.T1799A:p.V600E
HT29	chr7	140534557	G	C	.	86	189	nonsynonymous SNV	BRAF	MSS	NM_004333:c.C356G:p.T119S
HT29	chr10	101953859	A	G	.	209	96	nonsynonymous SNV	CHUK	MSS	NM_001278:c.T1856C:p.I619T
HT29	chr11	1466541	C	T	.	116	30	nonsynonymous SNV	BRSK2	MSS	NM_001256627:c.C830T:p.P277L
HT29	chr13	32912560	G	A	rs28897724	103	265	synonymous SNV	BRCA2	MSS	NM_000059:c.G4068A:p.L1356L
HT29	chr13	110435579	G	A	.	73	42	nonsynonymous SNV	IRS2	MSS	NM_003749:c.C2822T:p.S941L
HT29	chr14	103447349	G	A	.	69	54	stopgain SNV	CDC42BPB	MSS	NM_006035:c.C901T:p.Q301X
HT29	chr14	103447350	G	A	.	70	54	synonymous SNV	CDC42BPB	MSS	NM_006035:c.C900T:p.F300F
HT29	chr17	7577120	C	T	rs28934576	0	55	nonsynonymous SNV	TP53	MSS	NM_000546:c.G818A:p.R273H
HT29	chr19	3779070	G	A	.	66	52	synonymous SNV	MATK	MSS	NM_139354:c.C994T:p.L332L
HT29	chrX	18616640	C	A	.	187	79	nonsynonymous SNV	CDKL5	MSS	NM_003159:c.C884A:p.P295H
IS1	chr1	11184623	C	G	.	53	42	synonymous SNV	MTOR	MSS	NM_004958:c.G6594C:p.V2198V
IS1	chr1	46521468	-	T	.	70	78	frameshift insertion	PIK3R3	MSS	NM_003629:c.940_941insA:p.V314fs
IS1	chr2	158395192	G	T	.	44	18	nonsynonymous SNV	ACVR1C	MSS	NM_001111033:c.C778A:p.P260T
IS1	chr2	179435704	C	T	.	171	69	nonsynonymous SNV	TTN	MSS	NM_003319:c.G47960A:p.R15987H
IS1	chr2	179638362	G	T	.	97	45	nonsynonymous SNV	TTN	MSS	NM_003319:c.C7283A:p.T2428N
IS1	chr5	112173411	T	C	.	71	65	nonsynonymous SNV	APC	MSS	NM_001127511:c.T2066C:p.L689P
IS1	chr5	112174340	A	-	.	32	46	frameshift deletion	APC	MSS	NM_001127511:c.2995delA:p.N999fs
IS1	chr5	112175639	C	T	rs121913332	35	43	stopgain SNV	APC	MSS	NM_001127511:c.C4294T:p.R1432X
IS1	chr6	152332875	G	A	.	0	146	nonsynonymous SNV	ESR1	MSS	NM_000125:c.G1181A:p.R394H
IS1	chr7	100417274	G	A	.	42	80	nonsynonymous SNV	EPHB4	MSS	NM_004444:c.C1202T:p.T401I
IS1	chr10	105758685	G	A	.	40	70	synonymous SNV	SLK	MSS	NM_014720:c.G543A:p.T181T
IS1	chr11	1477647	C	G	.	0	16	nonsynonymous SNV	BRSK2	MSS	NM_001256627:c.C1738G:p.P580A
IS1	chr11	108129787	T	G	.	68	21	nonsynonymous SNV	ATM	MSS	NM_000051:c.T2451G:p.D817E
IS1	chr12	25398284	C	T	rs121913529	0	383	nonsynonymous SNV	KRAS	MSS	NM_004985:c.G35A:p.G12D
IS1	chr12	121678327	-	TTTT	.	2	23	frameshift insertion	CAMKK2	MSS	NM_001270486:c.1615_1616insAAAA:p.G539fs
IS1	chr13	32912560	G	A	rs28897724	108	29	synonymous SNV	BRCA2	MSS	NM_000059:c.G4068A:p.L1356L
IS1	chr13	32913919	C	T	rs80359791	101	43	synonymous SNV	BRCA2	MSS	NM_000059:c.C5427T:p.C1809C
IS1	chr13	48955555	C	T	.	24	57	synonymous SNV	RB1	MSS	NM_000321:c.C1671T:p.I557I
IS1	chr15	43044413	G	A	.	0	171	nonsynonymous SNV	TTBK2	MSS	NM_173500:c.C3031T:p.P1011S
IS1	chr17	7578443	A	G	.	0	45	nonsynonymous SNV	TP53	MSS	NM_000546:c.T487C:p.Y163H
IS1	chr17	29667616	G	C	.	62	60	nonsynonymous SNV	NF1	MSS	NM_000267:c.G6952C:p.E2318Q
IS1	chr22	47087649	G	C	.	24	25	synonymous SNV	CERK	MSS	NM_022766:c.C1152G:p.V384V
IS1	chrX	21627270	G	A	.	27	52	nonsynonymous SNV	CNKSR2	MSS	NM_001168647:c.G2137A:p.E713K
IS1	chrX	54263511	G	A	.	186	64	synonymous SNV	WNK3	MSS	NM_001002838:c.C4347T:p.C1449C
IS1	chrX	54321181	C	T	.	57	99	nonsynonymous SNV	WNK3	MSS	NM_001002838:c.G1498A:p.A500T
IS3	chr1	11184623	C	G	.	94	46	synonymous SNV	MTOR	MSS	NM_004958:c.G6594C:p.V2198V
IS3	chr1	162750012	G	T	.	119	52	synonymous SNV	DDR2	MSS	NM_006182:c.G2544T:p.L848L
IS3	chr2	30143213	C	G	.	38	12	nonsynonymous SNV	ALK	MSS	NM_004304:c.G313C:p.A105P
IS3	chr2	179438723	C	A	.	109	65	nonsynonymous SNV	TTN	MSS	NM_003319:c.G44941T:p.A14981S
IS3	chr2	179638362	G	T	.	35	79	nonsynonymous SNV	TTN	MSS	NM_003319:c.C7283A:p.T2428N
IS3	chr5	112173411	T	C	.	145	111	nonsynonymous SNV	APC	MSS	NM_001127511:c.T2066C:p.L689P
IS3	chr5	112174340	A	-	.	73	55	frameshift deletion	APC	MSS	NM_001127511:c.2995delA:p.N999fs
IS3	chr5	112175639	C	T	rs121913332	61	56	stopgain SNV	APC	MSS	NM_001127511:c.C4294T:p.R1432X
IS3	chr6	152332875	G	A	.	102	191	nonsynonymous SNV	ESR1	MSS	NM_000125:c.G1181A:p.R394H
IS3	chr7	97822950	C	T	.	25	11	nonsynonymous SNV	LMTK2	MSS	NM_014916:c.C3173T:p.T1058I
[truncated: 1,171 more rows]

## Sheet: Table_S6
Significant focal peaks, GISTIC2.0
Input to analysis: 29 MSI/MSS CRC cell lines
Genes in wide peak were included in the table if <10 genes in peak, otherwise genes are not listed. Genes in boldface are mentioned in the main text.
Type of aberration	cytoband	q value (thresh 0.25)	residual q value	wide peak boundaries	Number of genes in wide peak	genes in wide peak
AMP	13q13.1	0.17337	0.24216	chr13:1-74494127	268
AMP	13q22.1	0.17337	0.17337	chr13:73608076-73953431	1	KLF5
AMP	19q13.11	0.17337	0.17337	chr19:33662631-33778239	3	LRP3, SLC7A10, WDR88
AMP	22q11.21	0.17337	0.17337	chr22:16636740-27854693	195
AMP	3q29	0.17337	0.17337	chr3:143171981-198022430	336
AMP	8q24.21	0.17337	0.17337	chr8:100453179-146364022	281
AMP	11q21	0.2175	0.2175	chr11:65689656-112424381	399
DEL	3p14.2	9.1214e-41	9.1214e-41	chr3:59034763-61547330	1	FHIT
DEL	4q22.1	1.3438e-20	1.3438e-20	chr4:91148280-93240505	1	FAM190A
DEL	20p12.1	3.9229e-18	3.9229e-18	chr20:14302876-16036135	3	FLRT3, MACROD2, MACROD2-AS1
DEL	16q23.1	4.4858e-18	4.4858e-18	chr16:78129058-79627770	1	WWOX
DEL	15q24.3	2.6704e-08	2.6704e-08	chr15:76632488-77227699	1	SCAPER
DEL	18q21.2	4.2682e-08	4.2682e-08	chr18:48514396-48705371	1	SMAD4
DEL	7q31.1	0.00012758	0.00012758	chr7:109599468-111366370	2	LRRN3, IMMP2L
DEL	11q11	0.00074037	0.00074037	chr11:55363341-55541283	4	OR4P4, OR4C11, OR4S2, OR4C6
DEL	3q26.31	0.0025483	0.0025483	chr3:173999806-175087616	1	MIR4789
DEL	17p11.2	0.0035416	0.0035416	chr17:18319863-18540773	5	FAM106A, USP32P2, CCDC144B, LOC339240, LGALS9C
DEL	16p13.3	0.0049462	0.0049462	chr16:5145717-7764197	1	RBFOX1
DEL	6p25.3	0.011116	0.020438	chr6:1608837-2250882	2	FOXC1, GMDS
DEL	6p25.3	0.01824	0.03975	chr6:1-395055	1	DUSP22
DEL	6q26	0.01824	0.01824	chr6:161693099-163153207	1	PARK2
DEL	14q23.3	0.022901	0.024358	chr14:66963153-67658112	1	GPHN
DEL	9p13.1	0.024358	0.024358	chr9:38619152-84533933	100
DEL	11p15.4	0.028957	0.030765	chr11:5776624-5841855	2	OR52N1, OR52N5
DEL	3q22.1	0.030765	0.030765	chr3:129695715-129819637	1	ALG1L2
DEL	3p21.1	0.055995	0.10124	chr3:52929656-53124512	1	SFMBT1
DEL	8p22	0.089395	0.089395	chr8:18384021-19041469	1	PSD3
DEL	5q35.3	0.12278	0.12278	chr5:180287931-180467481	2	BTNL3, BTNL8
DEL	2q37.3	0.1553	0.1553	chr2:242733124-243199373	4	PDCD1, NEU4, CXXC11, LOC728323
DEL	6q22.1	0.17662	0.18742	chr6:74537761-153291864	375

## Sheet: Table_S7
Gene-wise DNA copy number estimates for individual cell lines
"-1": copy number loss; "0": neutral copy number; "1": copy number gain. The numbers are based on PCF value thresholds of ≥0.15 (gain) and ≤-0.15 (loss)
Gene_name	CACO2	CL11	CL34	CL40	CO115	COLO205	COLO320	COLO678	DLD1	EB	FRI	HCC2998	HCT116	HCT15	HT29	IS1	IS3	KM12	LOVO	LS1034	LS174T	NCIH508	RKO	SW1116	SW1463	SW403	SW48	SW480	SW620	SW837	SW948	TC71	V9P	WIDR
A1BG	-1	0	0	0	0	0	0	0	0	0	0	0	0	0	1	1	0	0	0	0	0	0	0	-1	0	-1	0	1	0	0	-1	0	0	1
A1BG-AS1	-1	0	0	0	0	0	0	0	0	0	0	0	0	0	1	1	0	0	0	0	0	0	0	-1	0	-1	0	1	0	0	-1	0	0	1
A1CF	1	0	0	0	0	0	0	1	0	0	-1	0	0	0	0	0	0	0	0	0	0	0	0	0	0	-1	0	0	1	0	-1	0	0	0
A2M	1	0	0	1	0	0	1	1	0	1	-1	0	0	0	0	1	0	0	0	1	0	0	0	0	1	-1	0	1	1	0	0	0	0	0
A2M-AS1	1	0	0	1	0	0	1	1	0	1	-1	0	0	0	0	1	0	0	0	1	0	0	0	0	1	-1	0	1	1	0	0	0	0	0
A2ML1	1	0	0	1	0	0	1	1	0	1	-1	0	0	0	0	1	0	0	0	1	0	0	0	0	1	-1	0	1	1	0	0	0	0	0
A2MP1	1	0	0	1	0	0	1	1	0	1	-1	0	0	0	0	1	0	0	0	1	0	0	0	0	1	-1	0	1	1	0	0	0	0	0
A3GALT2	-1	0	0	0	0	0	0	0	0	0	-1	0	0	0	0	0	0	0	0	-1	0	-1	0	-1	0	-1	0	0	0	0	-1	0	0	0
A4GALT	-1	-1	0	0	0	0	0	-1	0	-1	-1	0	0	0	-1	0	-1	0	0	-1	0	0	0	-1	-1	-1	0	0	0	-1	-1	0	-1	-1
A4GNT	0	0	0	0	0	1	1	1	0	0	0	0	0	0	0	1	0	0	0	0	0	1	0	1	0	0	0	0	0	0	1	0	0	0
AA06	0	0	0	0	0	1	0	1	0	1	0	0	0	0	0	0	1	0	0	0	0	1	0	0	0	-1	0	0	0	0	0	0	0	0
AAAS	0	0	0	1	0	0	0	1	0	0	0	0	0	0	0	0	0	0	0	0	0	0	0	0	0	0	0	0	1	0	0	1	0	0
AACS	0	0	0	1	0	1	0	1	0	0	1	0	0	0	0	0	0	1	0	1	0	0	0	0	0	-1	0	0	0	0	0	1	0	0
AACSP1	1	0	0	0	0	1	0	0	0	0	0	0	0	0	0	1	1	0	0	0	0	0	0	1	0	0	0	1	0	1	-1	1	0	0
AADAC	1	0	0	0	0	1	1	1	0	0	0	0	0	0	1	1	0	0	0	0	0	1	0	1	0	0	0	0	0	0	1	0	0	1
AADACL2	1	0	0	0	0	1	1	1	0	0	0	0	0	0	1	1	0	0	0	0	0	1	0	1	0	0	0	0	0	0	1	0	0	1
AADACL3	-1	0	0	-1	0	0	0	0	0	0	0	-1	0	0	0	0	0	0	0	-1	0	-1	0	-1	0	-1	0	0	0	0	-1	0	0	0
AADACL4	-1	0	0	-1	0	0	0	0	0	0	0	-1	0	0	0	0	0	0	0	-1	0	-1	0	-1	0	-1	0	0	0	0	-1	0	0	0
AADACP1	1	0	0	0	0	1	1	1	0	0	0	0	0	0	1	1	0	0	0	0	0	1	0	1	0	0	0	0	0	0	1	0	0	1
AADAT	-1	0	0	0	0	0	0	0	-1	-1	-1	0	0	0	-1	-1	0	0	0	0	0	-1	0	-1	-1	-1	0	-1	0	0	-1	0	1	-1
AAED1	0	0	0	0	0	0	0	0	0	0	0	0	0	0	0	0	1	0	0	0	0	0	1	-1	0	0	0	0	0	0	1	0	0	0
AAGAB	0	0	1	0	0	1	1	1	0	0	0	0	0	0	1	1	0	0	0	1	1	0	0	-1	-1	1	0	0	0	0	-1	0	0	1
AAK1	1	0	0	0	0	0	0	0	1	1	0	0	0	0	0	0	0	0	0	0	0	0	0	0	0	0	0	1	0	0	1	0	0	0
AAMDC	1	0	0	0	0	0	0	1	1	1	0	0	0	0	1	1	0	0	0	1	0	0	0	0	0	0	0	0	1	1	1	0	1	1
AAMP	1	0	0	0	0	0	0	0	0	0	0	0	0	0	0	0	0	0	0	0	0	0	0	0	0	0	0	0	0	0	1	0	0	0
AANAT	0	0	0	0	0	1	0	1	0	1	-1	0	1	0	0	0	1	0	0	0	0	1	0	0	0	-1	0	0	1	1	0	0	0	0
AAR2	1	0	0	0	0	1	-1	1	0	1	1	0	0	0	1	1	0	1	0	1	0	1	1	1	1	1	0	1	1	1	1	0	1	1
AARD	-1	0	0	0	1	1	0	0	0	1	1	0	1	0	1	0	0	1	0	-1	0	0	1	0	1	1	0	0	0	0	0	0	1	1
AARS	0	0	0	0	0	0	1	0	0	0	0	0	0	0	0	0	-1	0	0	0	0	0	0	-1	0	0	0	0	1	0	-1	0	0	0
AARS2	0	-1	0	0	0	-1	0	1	0	0	0	0	0	0	0	0	-1	0	0	-1	0	0	0	-1	0	-1	0	-1	0	0	0	0	0	0
AARSD1	0	0	0	0	0	1	0	1	0	1	0	0	0	0	0	0	1	0	0	0	0	1	0	0	0	-1	0	0	0	0	0	0	0	0
AASDH	-1	0	0	0	0	0	0	0	0	-1	0	0	0	0	0	0	0	0	0	0	0	-1	0	-1	-1	-1	0	-1	0	0	-1	0	0	1
AASDHPPT	1	0	0	0	0	0	0	1	1	1	0	0	0	0	1	1	0	0	0	1	0	0	0	0	0	0	0	0	1	1	1	0	0	1
AASS	0	1	0	0	0	0	1	1	0	0	1	1	0	0	0	0	0	0	1	0	1	0	1	0	0	0	1	0	1	0	1	1	0	0
AATBC	0	0	0	0	-1	0	0	0	0	0	0	0	0	0	-1	0	-1	0	1	-1	0	-1	0	0	0	0	0	1	0	0	-1	0	0	-1
AATF	0	0	0	0	0	1	0	1	0	1	0	0	0	0	1	0	1	0	0	0	0	1	0	0	0	-1	0	0	0	0	0	0	0	1
AATK	0	1	0	0	0	1	0	1	0	1	-1	0	1	0	0	0	1	0	0	0	0	1	0	0	0	-1	0	0	1	1	0	0	0	0
AATK-AS1	0	1	0	0	0	1	0	1	0	1	-1	0	1	0	0	0	1	0	0	0	0	1	0	0	0	-1	0	0	1	1	0	0	0	0
ABAT	-1	0	0	0	0	0	0	0	0	0	0	0	0	0	0	-1	0	0	0	0	0	0	0	0	0	0	0	0	0	0	-1	0	-1	0
ABCA1	0	0	0	0	0	1	1	0	0	0	0	0	0	0	0	0	1	0	0	0	0	0	1	0	0	0	0	0	0	0	1	0	0	0
ABCA10	0	-1	0	0	0	1	0	1	0	1	-1	0	1	0	0	0	1	0	0	0	0	1	0	0	0	-1	0	0	1	0	0	0	0	0
ABCA11P	-1	0	0	0	0	0	0	0	0	-1	0	0	0	0	0	-1	0	0	0	0	0	-1	0	0	0	-1	0	-1	0	0	-1	0	-1	1
ABCA12	1	0	0	0	0	0	0	0	0	0	0	0	0	0	0	0	0	0	0	0	0	0	0	0	0	0	0	0	0	0	1	0	0	0
ABCA13	0	1	0	0	0	0	0	1	0	0	1	1	0	0	0	1	0	0	1	0	1	0	0	1	0	1	1	1	1	0	1	0	1	0
ABCA17P	0	0	-1	0	0	0	0	0	0	0	0	0	0	0	0	-1	0	0	0	0	0	0	0	0	0	0	0	0	0	0	-1	0	-1	0
ABCA2	0	0	0	0	0	1	1	0	0	0	0	0	0	0	0	0	1	0	0	0	0	0	1	1	0	0	0	0	0	0	1	0	0	0
ABCA3	0	0	-1	0	0	0	0	0	0	0	0	0	0	0	0	-1	0	0	0	0	0	0	0	0	0	0	0	0	0	0	-1	0	-1	0
ABCA4	-1	0	0	0	0	-1	1	0	0	0	0	0	0	0	0	0	0	0	0	-1	0	-1	0	-1	0	-1	0	0	0	-1	-1	0	0	0
ABCA5	0	-1	0	0	0	1	0	1	0	1	-1	0	1	0	0	0	1	0	0	0	0	1	0	0	0	-1	0	0	1	0	0	0	0	0
ABCA6	0	-1	0	0	0	1	0	1	0	1	-1	0	1	0	0	0	1	0	0	0	0	1	0	0	0	-1	0	0	1	0	0	0	0	0
ABCA7	-1	0	0	0	0	-1	1	0	0	0	0	0	0	0	-1	0	0	0	0	0	0	0	0	-1	0	-1	0	-1	0	-1	0	0	-1	-1
ABCA8	0	-1	0	0	0	1	0	1	0	1	-1	0	1	0	0	0	1	0	0	0	0	1	0	0	0	-1	0	0	1	0	0	0	0	0
ABCA9	0	-1	0	0	0	1	0	1	0	1	-1	0	1	0	0	0	1	0	0	0	0	1	0	0	0	-1	0	0	1	0	0	0	0	0
ABCB1	0	1	0	0	0	0	1	1	0	0	1	1	0	0	0	0	0	0	1	0	1	0	0	0	0	0	1	1	1	0	1	1	0	0
ABCB10	0	0	0	1	0	1	0	1	0	0	1	0	0	0	0	0	0	0	0	-1	0	-1	0	-1	0	1	0	0	0	0	0	0	0	0
ABCB11	1	0	0	0	0	0	0	0	0	0	0	0	0	0	0	1	0	0	0	0	0	0	0	0	0	0	0	0	0	0	1	0	0	0
ABCB4	0	1	0	0	0	0	1	1	0	0	1	1	0	0	0	0	0	0	1	0	1	0	0	0	0	0	1	1	1	0	1	1	0	0
ABCB5	0	1	0	0	0	0	1	1	0	0	1	1	0	0	-1	1	1	0	1	0	1	0	0	1	0	1	1	1	1	0	1	0	1	-1
ABCB6	1	0	0	0	0	0	0	0	0	0	0	0	0	0	0	0	0	0	0	0	0	0	0	0	0	0	0	0	0	0	1	0	0	0
ABCB8	0	1	0	0	0	0	1	1	0	0	1	1	0	0	1	1	0	0	1	0	1	0	1	1	0	0	1	0	1	0	1	1	0	1
ABCB9	0	0	0	1	0	1	0	1	0	0	1	0	0	0	0	0	0	1	0	1	0	-1	0	0	0	-1	0	0	0	0	0	1	0	0
ABCC1	-1	0	0	0	0	0	1	0	0	0	0	0	0	0	0	-1	0	0	0	0	0	0	0	0	0	0	0	0	0	0	-1	0	-1	0
ABCC10	0	-1	0	0	0	-1	0	1	0	0	0	0	0	0	0	0	-1	0	0	-1	0	0	0	-1	0	-1	0	-1	0	0	0	0	0	0
ABCC11	-1	0	0	0	0	0	1	0	0	0	0	0	0	0	0	0	0	0	0	0	0	0	0	-1	0	0	0	0	1	0	-1	0	0	0
ABCC12	-1	0	0	0	0	0	1	0	0	0	0	0	0	0	0	0	0	0	0	0	0	0	0	-1	0	0	0	0	1	0	-1	0	0	0
ABCC13	0	0	0	0	0	-1	0	-1	0	0	0	0	0	0	-1	-1	-1	-1	0	-1	0	1	0	0	0	0	0	1	0	0	-1	0	0	-1
ABCC2	0	0	0	0	0	0	0	1	0	0	0	0	1	0	0	0	0	0	0	0	0	0	0	0	0	-1	0	0	0	0	-1	0	0	0
ABCC3	1	0	0	0	0	1	0	1	0	1	0	0	1	0	0	0	1	0	0	0	0	1	0	0	0	-1	0	0	0	0	0	0	0	0
ABCC4	0	0	0	1	0	1	0	1	0	0	0	1	0	0	1	0	1	0	0	1	0	1	0	0	1	1	0	0	1	-1	1	0	0	1
ABCC5	1	0	0	0	0	1	1	1	0	0	0	0	0	0	0	1	0	0	0	0	0	1	0	1	1	0	0	0	0	0	1	0	0	0
ABCC5-AS1	1	0	0	0	0	1	1	1	0	0	0	0	0	0	0	1	0	0	0	0	0	1	0	1	1	0	0	0	0	0	1	0	0	0
ABCC6	-1	0	0	0	0	0	1	0	0	0	0	0	0	0	0	-1	0	0	0	0	0	0	0	0	0	0	0	0	0	0	-1	0	-1	0
ABCC6P1	-1	0	0	0	0	0	1	0	0	0	0	0	0	0	0	-1	0	0	0	0	0	0	0	0	0	0	0	0	0	0	-1	0	-1	0
ABCC6P2	-1	0	0	0	0	0	1	0	0	0	0	0	0	0	0	-1	0	0	0	0	0	0	0	0	0	0	0	0	0	0	-1	0	0	0
ABCC8	0	0	0	0	0	0	0	0	0	1	0	0	0	0	1	0	0	0	0	1	0	0	0	0	0	0	0	0	1	-1	1	0	0	1
ABCC9	1	0	0	1	0	0	1	1	0	1	0	0	0	0	1	1	0	0	0	1	0	0	0	0	1	0	0	1	1	0	0	1	0	1
ABCD2	1	0	0	1	0	0	1	1	0	1	0	0	0	0	0	-1	0	0	0	0	0	0	0	0	0	0	0	0	0	0	0	1	0	0
ABCD3	-1	0	0	0	0	-1	1	0	1	0	0	0	0	0	0	0	0	0	0	-1	0	-1	0	-1	0	-1	0	0	0	-1	-1	0	0	0
ABCD4	0	0	0	0	0	0	0	0	0	0	0	0	0	0	-1	0	-1	0	0	0	0	-1	0	0	0	-1	1	1	0	0	-1	0	-1	-1
ABCE1	-1	0	0	0	0	0	0	0	0	-1	-1	0	0	0	0	0	0	0	0	-1	0	-1	0	-1	-1	-1	0	-1	0	0	-1	0	1	1
ABCF1	0	-1	1	0	0	0	0	1	0	0	0	0	0	0	0	0	-1	-1	0	-1	0	0	0	-1	0	-1	0	-1	0	0	0	0	0	0
ABCF2	0	1	0	0	0	0	1	1	0	0	1	1	0	0	1	1	0	0	1	0	1	0	1	1	0	0	1	0	1	0	1	1	0	1
ABCF3	1	0	0	0	0	1	1	1	0	0	0	0	0	0	0	1	0	0	0	0	0	1	0	1	1	0	0	0	0	0	1	0	0	0
ABCG1	0	0	0	0	0	0	0	0	0	0	0	0	0	0	-1	0	-1	0	1	-1	0	-1	0	0	0	0	0	1	0	0	-1	0	0	-1
ABCG2	-1	0	0	0	0	0	0	0	0	-1	-1	0	0	0	0	0	0	0	0	0	0	-1	0	-1	-1	-1	0	-1	0	0	-1	0	0	1
ABCG4	1	0	0	0	0	0	0	1	1	1	0	0	0	0	1	1	0	0	0	1	0	0	0	0	0	0	0	0	0	1	1	0	0	1
ABCG5	0	0	0	0	0	0	1	0	1	1	0	0	0	0	0	0	0	0	0	0	0	0	0	0	0	0	0	1	0	0	1	0	0	0
ABCG8	0	0	0	0	0	0	1	0	1	1	0	0	0	0	0	0	0	0	0	0	0	0	0	0	0	0	0	1	0	0	1	0	0	0
ABHD1	0	0	0	0	0	0	1	0	0	1	0	0	0	0	0	0	0	0	0	0	0	0	0	0	0	0	0	1	0	0	1	0	0	0
ABHD10	0	0	0	0	0	1	1	1	0	0	0	0	1	0	1	1	0	0	0	0	0	1	0	1	0	0	0	0	0	0	1	0	0	1
ABHD11	0	1	0	0	0	0	1	1	0	0	1	1	0	0	0	0	0	0	1	0	1	0	0	0	0	0	1	1	1	0	1	1	0	0
ABHD11-AS1	0	1	0	0	0	0	1	1	0	0	1	1	0	0	0	0	0	0	1	0	1	0	0	0	0	0	1	1	1	0	1	1	0	0
ABHD12	0	0	0	0	0	1	0	0	0	1	-1	0	0	0	1	1	0	0	0	1	0	1	1	-1	1	1	0	1	1	-1	1	0	1	1
ABHD12B	0	0	0	0	0	0	0	0	0	0	0	0	0	0	-1	0	-1	0	0	0	0	-1	0	0	0	-1	1	0	0	0	-1	0	-1	-1
ABHD13	0	0	0	1	0	1	1	1	1	0	0	1	0	0	1	0	1	0	0	1	0	1	0	0	1	1	0	0	1	-1	1	0	0	1
ABHD14A	-1	0	0	0	0	-1	0	0	0	0	0	0	0	0	-1	0	0	0	0	0	0	0	0	-1	0	0	0	0	0	-1	0	0	0	-1
ABHD14A-ACY1	-1	0	0	0	0	-1	0	0	0	0	0	0	0	0	-1	0	0	0	0	0	0	0	0	-1	0	0	0	0	0	-1	0	0	0	-1
ABHD14B	-1	0	0	0	0	-1	0	0	0	0	0	0	0	0	-1	0	0	0	0	0	0	0	0	-1	0	0	0	0	0	-1	0	0	0	-1
ABHD15	0	0	0	0	0	1	0	1	0	1	0	0	0	0	0	0	1	0	0	0	0	1	0	0	0	-1	0	0	0	0	0	0	0	0
ABHD16A	0	-1	1	0	0	0	0	1	0	0	0	0	0	0	0	0	-1	-1	0	-1	0	0	0	-1	0	-1	0	-1	0	0	0	0	0	0
ABHD16B	1	0	0	0	0	1	0	1	0	1	1	0	0	0	1	1	0	1	0	1	0	1	1	1	1	1	0	1	1	1	1	0	1	1
ABHD17A	-1	0	0	0	0	-1	0	0	0	0	0	0	0	0	-1	0	0	0	0	0	0	0	0	-1	0	-1	0	-1	0	-1	0	0	-1	-1
ABHD17B	-1	0	0	0	0	0	1	0	0	0	0	0	0	0	0	0	1	0	0	0	0	0	0	-1	0	0	0	0	0	0	1	0	0	0
ABHD17C	0	0	1	0	0	1	1	1	0	0	0	0	0	0	1	0	0	0	0	1	1	0	0	1	-1	1	0	0	0	0	0	0	0	1
ABHD18	-1	0	0	0	0	0	0	-1	0	-1	-1	0	0	0	0	0	0	0	0	-1	0	-1	0	-1	-1	-1	0	-1	-1	0	-1	0	0	1
ABHD2	0	1	1	0	0	1	1	1	0	0	0	0	0	0	1	0	0	0	0	1	1	0	0	0	-1	1	0	0	0	0	0	0	0	1
ABHD3	1	0	0	0	0	-1	0	0	0	-1	-1	0	0	0	-1	-1	-1	1	0	-1	0	0	0	-1	1	-1	0	0	0	-1	-1	0	1	-1
ABHD4	0	0	-1	0	0	0	0	0	0	0	0	0	0	0	-1	0	-1	0	0	0	0	-1	0	0	0	-1	0	0	0	0	-1	0	-1	-1
ABHD5	-1	0	0	0	0	-1	0	0	0	0	0	0	0	0	-1	0	0	0	0	0	0	0	0	-1	0	0	0	0	0	-1	0	0	0	-1
ABHD6	0	0	0	0	0	-1	0	0	-1	0	0	0	0	0	-1	0	0	0	0	0	0	0	0	-1	0	0	0	0	0	-1	0	0	0	-1
ABHD8	-1	0	0	0	0	0	0	0	0	0	0	0	0	0	-1	0	0	0	0	0	0	0	0	-1	0	-1	0	1	0	-1	0	0	-1	-1
ABI1	0	0	0	0	0	-1	0	1	0	0	-1	0	0	0	0	0	0	0	0	0	0	0	1	-1	0	-1	0	0	0	0	-1	0	0	0
ABI2	1	0	0	0	0	0	0	0	0	0	0	0	0	0	0	1	0	0	0	0	0	0	0	0	0	0	0	0	0	0	1	0	0	0
ABI3	1	0	0	0	0	1	0	1	0	1	0	0	1	0	0	0	1	0	0	0	0	1	0	0	0	-1	0	0	0	0	0	0	0	0
ABI3BP	0	0	0	0	0	1	0	1	0	0	0	0	0	0	1	1	0	0	0	0	0	1	0	1	0	0	0	0	0	0	1	0	0	1
ABL1	0	0	0	0	0	1	1	0	0	0	0	0	0	0	0	0	1	0	0	0	0	0	1	1	0	0	0	0	0	0	1	0	0	0
ABL2	0	0	0	0	0	1	0	1	0	0	0	0	0	0	0	-1	0	0	0	0	0	0	0	-1	0	1	0	0	0	0	0	0	0	0
ABLIM1	0	0	0	0	0	0	0	1	0	0	0	0	1	0	0	0	0	0	0	0	0	0	0	0	0	-1	0	0	0	0	-1	0	0	0
ABLIM2	-1	0	0	0	0	0	0	0	0	-1	0	0	0	0	0	-1	0	0	0	0	0	-1	0	0	0	-1	0	-1	0	0	-1	0	-1	1
ABLIM3	1	0	0	0	0	0	0	0	0	0	0	0	0	0	0	1	1	0	0	1	0	0	0	1	0	0	0	1	0	1	-1	1	0	0
ABO	0	0	0	0	0	1	1	0	0	0	0	0	0	0	0	0	1	0	0	0	0	0	1	1	0	0	0	0	0	0	1	0	0	0
ABR	1	-1	0	0	0	0	0	0	0	-1	-1	0	0	-1	-1	0	-1	0	0	-1	0	-1	0	-1	-1	-1	0	0	1	-1	0	0	-1	-1
ABRA	-1	0	0	0	1	1	0	0	0	0	1	0	1	0	1	0	0	1	0	-1	0	0	1	0	1	1	0	0	0	0	0	0	1	0
ABRACL	0	-1	0	0	0	-1	0	-1	0	0	1	0	0	0	-1	0	0	0	0	-1	0	0	0	1	0	-1	0	-1	0	0	0	0	-1	0
ABT1	0	-1	1	0	0	0	0	1	0	0	0	0	0	0	0	0	-1	-1	0	-1	0	0	0	-1	0	-1	0	-1	0	0	0	0	0	0
ABTB1	0	0	0	0	0	1	1	1	0	0	0	0	0	0	1	1	0	0	0	0	0	1	0	1	0	0	0	0	0	0	1	0	0	1
ABTB2	0	0	0	0	0	0	0	0	0	1	0	0	0	0	1	0	0	0	0	1	0	0	0	0	0	0	0	0	1	0	1	0	0	1
ACAA1	-1	0	0	0	0	-1	0	0	0	0	0	0	0	0	-1	0	0	0	0	0	0	0	0	-1	0	0	0	0	0	-1	0	0	0	-1
ACAA2	-1	-1	-1	0	-1	-1	0	0	0	-1	-1	0	0	0	-1	-1	-1	-1	0	-1	0	0	0	-1	-1	-1	0	-1	-1	-1	-1	0	-1	-1
ACACA	0	0	0	0	0	1	0	1	0	1	0	0	0	0	1	0	1	0	0	0	0	1	0	0	0	-1	0	0	0	0	0	0	0	1
ACACB	0	0	0	1	0	0	0	1	0	0	0	0	0	0	0	0	0	1	0	0	0	0	0	0	0	-1	0	0	0	0	0	1	0	0
ACAD10	0	0	0	1	0	0	0	1	0	0	0	0	0	0	0	0	0	1	0	0	0	0	0	0	0	-1	0	0	0	0	0	1	0	0
ACAD11	0	0	0	0	0	1	1	1	0	0	0	0	0	0	0	1	0	0	0	0	0	1	0	1	0	0	0	0	0	0	1	0	0	0
ACAD8	1	0	0	0	0	0	0	1	1	1	0	0	0	0	1	1	0	0	0	1	0	0	0	0	0	0	0	0	0	1	1	0	0	1
ACAD9	0	0	0	0	0	1	1	1	0	0	0	0	0	0	1	1	0	0	0	0	0	1	0	1	0	0	0	0	0	0	1	0	0	1
ACADL	1	0	0	0	0	0	0	0	0	0	0	0	0	0	0	0	0	0	0	0	0	0	0	0	0	0	0	0	0	0	1	0	0	0
ACADM	-1	0	0	0	0	-1	0	0	0	0	0	0	0	0	0	0	0	0	0	-1	0	-1	0	-1	0	-1	0	0	0	-1	-1	0	0	0
ACADS	0	0	0	1	0	1	0	1	0	0	1	0	0	0	0	0	0	1	0	1	0	0	0	0	0	-1	0	0	0	0	0	1	1	0
ACADSB	0	0	0	0	0	0	0	1	0	0	0	0	1	0	0	0	0	0	0	0	0	0	0	0	0	-1	0	0	0	0	-1	0	0	0
ACADVL	-1	-1	0	0	0	0	0	-1	0	-1	-1	0	0	0	-1	0	-1	0	0	-1	0	-1	0	-1	-1	-1	0	0	1	-1	0	0	-1	-1
ACAN	0	1	1	0	0	1	1	1	0	0	0	0	0	0	1	0	0	0	0	1	1	0	0	0	-1	1	0	0	0	0	0	0	0	1
ACAP1	-1	-1	0	0	0	0	0	-1	0	-1	-1	0	0	0	-1	0	-1	0	0	-1	0	-1	0	-1	-1	-1	0	0	1	-1	0	0	-1	-1
ACAP2	1	0	0	0	0	1	1	1	0	0	1	0	0	0	0	1	0	0	0	-1	0	1	0	1	1	0	0	0	1	0	1	0	0	0
ACAP3	-1	0	0	-1	0	0	0	0	0	0	0	0	0	0	0	0	0	0	0	-1	0	-1	0	-1	0	-1	0	0	0	0	-1	0	0	0
ACAT1	1	0	0	0	0	0	0	1	1	1	0	0	0	0	1	1	0	0	0	1	0	0	0	0	0	0	0	0	1	1	1	0	0	1
ACAT2	0	-1	0	0	0	-1	0	-1	0	0	0	0	0	0	-1	-1	1	0	0	-1	0	-1	0	1	0	-1	0	-1	0	0	0	0	-1	0
ACBD3	0	0	0	1	0	1	0	1	0	0	1	0	0	0	0	0	0	0	0	-1	0	-1	0	-1	0	1	0	0	0	0	0	0	0	0
ACBD4	0	0	0	0	0	1	0	1	0	1	0	0	0	0	0	0	1	0	0	0	0	1	0	0	0	-1	0	0	0	0	0	0	0	0
ACBD5	0	0	0	0	0	-1	0	1	0	0	-1	0	0	0	0	0	0	0	0	0	0	0	1	-1	0	-1	0	0	0	0	-1	0	0	0
ACBD6	0	0	0	0	0	1	0	1	0	0	0	0	0	0	0	-1	0	0	0	0	0	0	0	-1	0	1	0	0	0	0	0	0	0	0
ACBD7	0	0	1	0	0	-1	1	1	0	0	-1	0	0	0	0	0	0	0	0	0	0	0	1	-1	0	-1	0	0	0	0	-1	0	0	0
ACCS	0	0	0	0	0	0	0	0	0	1	0	0	0	0	1	0	0	0	0	1	0	0	0	0	0	0	0	0	1	0	1	0	0	1
ACCSL	0	0	0	0	0	0	0	0	0	1	0	0	0	0	1	0	0	0	0	1	0	0	0	0	0	0	0	0	1	0	1	0	0	1
ACD	0	0	0	0	0	0	1	0	0	0	0	0	0	0	0	0	-1	0	0	0	0	0	0	-1	0	0	0	0	1	0	-1	0	0	0
ACE	0	0	0	0	0	1	0	1	0	1	-1	0	1	0	0	0	1	0	0	0	0	1	0	0	0	-1	0	0	1	0	0	0	0	0
ACER1	-1	0	0	0	0	0	0	0	0	0	0	0	0	0	-1	0	0	0	0	0	0	0	0	-1	0	-1	0	0	0	-1	0	0	-1	-1
ACER2	-1	0	0	0	0	0	0	0	0	0	0	0	0	0	0	0	1	0	0	0	0	0	0	-1	0	-1	0	0	0	0	-1	0	-1	0
ACER3	1	0	0	0	0	0	0	1	1	1	0	0	0	0	1	1	0	0	0	1	0	0	0	0	0	0	0	0	1	1	1	0	1	1
ACHE	0	1	0	0	0	0	1	1	0	0	1	1	0	0	0	0	0	0	1	0	1	0	1	0	0	0	1	1	1	0	1	1	0	0
ACIN1	0	0	-1	0	0	0	0	0	0	0	0	0	0	0	-1	0	-1	0	0	0	0	-1	0	0	0	-1	0	0	0	0	-1	0	-1	-1
ACKR1	0	0	0	1	0	1	1	1	0	0	0	0	0	0	0	0	0	0	0	0	0	0	0	-1	0	1	0	0	0	0	0	0	0	0
ACKR2	-1	0	0	0	0	-1	0	0	0	0	0	0	0	0	-1	0	0	0	0	0	0	0	0	-1	0	0	0	0	0	-1	0	0	0	-1
ACKR3	-1	0	0	0	0	0	0	0	0	0	0	0	0	0	0	0	0	0	0	0	0	0	0	0	0	0	0	0	0	0	1	0	0	0
ACKR4	0	0	0	0	0	1	1	1	0	0	0	0	0	0	0	1	0	0	0	0	0	1	0	1	0	0	0	0	0	0	1	0	0	0
ACLY	0	0	0	0	0	1	0	1	0	1	0	0	0	0	0	0	1	0	0	0	0	1	0	0	0	-1	0	0	0	0	0	0	0	0
ACMSD	1	0	0	0	0	0	0	0	0	0	0	0	0	0	0	1	0	0	0	0	0	0	0	0	0	0	0	0	0	0	1	0	0	0
ACO1	-1	0	0	0	0	0	0	0	0	0	0	0	0	0	0	0	1	0	0	0	0	0	0	0	0	-1	0	0	0	0	-1	0	-1	0
ACO2	-1	-1	0	0	0	0	0	-1	0	-1	-1	0	0	0	-1	0	-1	0	0	-1	0	0	0	-1	-1	-1	0	0	0	-1	-1	0	-1	-1
ACOD1	0	0	0	1	0	1	0	1	0	0	0	1	0	0	0	0	1	0	0	1	0	1	0	0	1	1	0	0	1	-1	1	0	0	1
ACOT1	0	0	0	0	0	0	-1	0	0	0	0	0	0	0	-1	0	-1	0	0	0	0	-1	0	0	0	-1	1	1	0	0	-1	0	-1	-1
ACOT11	-1	0	0	0	0	0	0	0	0	0	0	0	0	0	0	0	0	0	0	-1	0	-1	0	-1	0	-1	0	0	0	-1	-1	0	0	0
ACOT12	0	0	0	0	0	1	0	1	0	0	0	0	0	0	0	0	1	0	0	-1	0	0	0	1	0	0	0	0	1	1	-1	1	0	0
ACOT13	0	-1	-1	0	0	0	0	1	0	0	0	0	0	0	0	0	-1	-1	0	-1	0	0	0	-1	0	-1	0	-1	0	0	0	0	0	0
ACOT2	0	0	0	0	0	0	0	0	0	0	0	0	0	0	-1	0	-1	0	0	0	0	-1	0	0	0	-1	1	1	0	0	-1	0	-1	-1
ACOT4	0	0	0	0	0	0	0	0	0	0	0	0	0	0	-1	0	-1	0	0	0	0	-1	0	0	0	-1	1	1	0	0	-1	0	-1	-1
ACOT6	0	0	0	0	0	0	0	0	0	0	0	0	0	0	-1	0	-1	0	0	0	0	-1	0	0	0	-1	1	1	0	0	-1	0	-1	-1
ACOT7	-1	0	0	-1	0	0	1	0	0	0	0	0	0	0	0	0	0	0	0	-1	0	-1	0	-1	0	-1	0	0	0	0	-1	0	0	0
ACOT8	1	0	0	0	0	1	0	1	0	1	1	0	0	0	1	1	0	1	0	1	0	1	1	1	1	1	0	1	1	1	1	0	1	1
ACOX1	0	0	0	0	0	1	0	1	0	1	-1	0	1	0	0	0	1	0	0	0	0	1	0	0	0	-1	0	0	1	1	0	0	0	0
ACOX2	0	0	0	0	0	-1	0	0	-1	0	0	0	0	0	-1	0	0	0	0	0	0	0	0	-1	0	0	0	0	0	-1	0	0	0	-1
ACOX3	-1	0	0	0	0	0	0	0	0	-1	0	0	0	0	0	-1	0	0	0	0	0	-1	0	0	0	-1	0	-1	0	1	-1	0	-1	1
ACOXL	1	0	0	0	0	0	1	0	0	0	0	0	0	0	0	1	0	0	0	0	0	0	0	0	0	0	0	1	0	0	1	0	0	0
ACP1	0	0	0	0	0	0	1	0	1	1	0	0	0	0	0	-1	0	0	0	0	0	0	0	0	0	0	0	1	0	0	1	-1	0	0
ACP2	0	0	0	0	0	0	0	0	0	1	0	0	0	0	1	0	0	0	0	1	0	0	0	1	0	0	0	0	1	0	1	0	0	1
ACP5	-1	0	0	0	0	0	0	0	0	0	0	0	0	0	-1	0	0	0	0	0	0	0	0	-1	0	-1	0	1	0	-1	0	0	-1	-1
ACP6	0	0	0	0	0	1	1	1	0	0	0	0	0	0	0	0	0	0	0	0	0	0	0	-1	0	0	0	0	0	0	0	0	0	0
ACP7	0	0	0	0	0	0	0	0	0	0	0	0	0	0	1	-1	0	0	0	0	0	0	0	-1	0	-1	0	1	0	0	1	0	1	1
ACPP	0	0	0	0	0	1	1	1	0	0	0	0	0	0	0	1	0	0	0	0	0	1	0	1	0	0	0	0	0	0	1	0	0	0
ACPT	-1	0	0	0	0	0	0	0	0	0	0	0	0	0	1	1	0	0	0	0	0	0	0	-1	0	-1	0	1	0	0	-1	0	0	1
ACR	-1	-1	0	0	0	0	1	-1	0	-1	-1	0	0	0	-1	0	-1	0	0	-1	0	0	0	-1	-1	-1	-1	0	0	-1	-1	0	-1	-1
ACRBP	1	0	0	1	0	0	1	1	0	1	-1	0	0	0	0	1	0	0	0	1	0	0	0	0	1	-1	0	1	1	0	0	0	0	0
ACRV1	1	0	0	0	0	0	0	1	1	1	0	0	0	0	1	1	0	0	0	1	0	0	0	0	0	0	0	0	0	1	1	0	0	1
ACSBG1	0	0	1	0	0	1	1	1	0	0	0	0	0	0	1	0	0	0	0	1	1	0	0	0	-1	1	0	0	0	0	0	0	0	1
ACSBG2	-1	0	0	0	0	0	0	0	0	0	0	0	0	0	-1	0	0	0	0	0	0	0	0	-1	0	-1	0	0	0	-1	0	0	-1	-1
ACSF2	1	0	0	0	0	1	0	1	0	1	0	0	1	0	0	0	1	0	0	0	0	1	0	0	0	-1	0	0	0	0	0	0	0	0
ACSF3	0	0	0	0	0	0	0	0	0	0	0	0	1	0	0	-1	-1	0	0	0	0	0	0	-1	0	0	0	0	0	0	-1	0	0	0
ACSL1	-1	0	0	0	0	0	1	0	-1	-1	-1	0	-1	0	-1	-1	0	0	0	0	0	-1	0	-1	-1	-1	0	-1	0	0	-1	0	1	-1
ACSL3	1	0	0	0	0	0	0	0	0	0	0	0	0	0	0	0	0	0	0	0	0	0	0	0	0	0	0	0	0	0	1	0	0	0
ACSL5	0	0	0	0	0	0	0	1	0	0	0	0	1	0	0	0	0	-1	0	0	0	0	0	0	0	-1	0	0	0	0	-1	0	0	0
ACSL6	1	0	0	0	0	1	0	0	0	0	0	0	0	0	0	1	1	0	0	1	0	-1	0	1	0	0	0	1	0	1	-1	1	0	0
ACSM1	-1	0	0	0	0	0	1	0	0	0	0	0	0	0	0	-1	-1	0	0	0	0	0	0	0	0	0	0	0	0	0	-1	0	-1	0
ACSM2A	-1	0	0	0	0	0	1	0	0	0	0	0	0	0	0	-1	-1	0	0	0	0	0	0	0	0	0	0	0	0	0	-1	0	-1	0
ACSM2B	-1	0	0	0	0	0	1	0	0	0	0	0	0	0	0	-1	-1	0	0	0	0	0	0	0	0	0	0	0	0	0	-1	0	-1	0
ACSM3	-1	0	0	0	0	0	1	0	0	0	0	0	0	0	0	-1	-1	0	0	0	0	0	0	0	0	0	0	0	0	0	-1	0	-1	0
ACSM4	1	0	0	1	0	0	1	1	0	1	-1	0	0	0	0	1	0	0	0	1	0	0	0	0	1	-1	0	1	1	0	0	0	0	0
ACSM5	-1	0	0	0	0	0	1	0	0	0	0	0	0	0	0	-1	-1	0	0	0	0	0	0	0	0	0	0	0	0	0	-1	0	-1	0
ACSM6	0	0	0	0	0	0	0	1	0	0	0	0	0	0	0	0	0	0	0	0	0	0	0	0	0	-1	0	0	0	0	-1	0	0	0
ACSS1	0	0	0	0	0	1	0	0	0	1	-1	0	0	0	0	1	0	0	0	1	0	1	1	-1	1	1	0	1	1	-1	1	0	1	1
ACSS2	1	0	0	0	0	1	0	1	0	1	1	0	0	0	1	1	0	1	0	1	0	-1	1	1	1	1	0	1	1	1	1	0	1	1
ACSS3	0	0	0	1	0	0	0	-1	0	0	0	0	0	0	0	0	0	1	0	0	0	0	0	0	0	-1	0	0	0	0	0	1	0	0
ACTA1	0	0	0	1	0	1	0	1	0	0	1	0	0	0	0	0	0	0	0	-1	0	-1	0	-1	0	1	0	0	0	0	0	0	0	0
ACTA2	0	0	0	0	0	0	0	1	0	0	0	0	0	0	0	0	0	0	0	0	0	0	0	0	0	-1	0	0	1	0	-1	0	0	0
ACTB	0	1	1	0	0	0	-1	1	0	0	1	1	0	0	0	1	1	0	1	0	1	0	0	1	0	1	1	1	1	0	1	0	1	0
ACTBL2	0	0	0	0	0	1	0	0	0	0	0	0	0	0	0	0	1	0	0	-1	0	0	0	1	0	0	0	0	1	0	-1	0	0	0
ACTC1	0	0	0	0	0	1	0	1	0	0	0	0	0	0	1	1	0	0	0	1	1	0	0	-1	-1	0	0	-1	0	0	-1	0	0	1
ACTG1	0	1	0	0	0	1	0	1	0	1	-1	0	1	0	0	0	1	0	0	0	0	1	0	0	0	-1	0	0	1	1	0	0	0	0
ACTG1P17	0	0	1	0	0	1	1	1	0	0	0	0	0	0	1	0	0	0	0	1	1	0	0	1	-1	1	0	0	0	0	0	0	0	1
ACTG1P20	-1	0	0	0	0	0	0	0	0	0	-1	0	0	0	0	0	0	0	0	-1	0	-1	0	-1	0	-1	0	0	0	0	-1	0	0	0
ACTG1P4	-1	0	0	0	0	-1	1	0	0	0	0	0	0	0	0	0	0	0	0	0	0	-1	0	-1	0	-1	0	0	0	-1	-1	0	0	0
ACTG2	1	0	0	0	0	0	0	0	0	1	0	0	0	0	0	0	0	0	0	0	0	0	0	0	0	0	0	1	0	0	1	0	0	0
ACTL10	1	0	0	0	0	1	0	1	0	1	1	0	0	0	1	1	0	1	0	1	0	1	1	1	1	1	0	1	1	1	1	0	1	1
ACTL6A	1	0	0	0	0	1	1	1	0	0	0	0	0	0	0	1	0	0	0	0	0	1	0	1	1	0	0	0	0	0	1	0	0	0
ACTL6B	0	1	0	0	0	0	1	1	0	0	1	1	0	0	0	0	0	0	1	0	1	0	1	0	0	0	1	1	1	0	1	1	0	0
ACTL7A	0	0	0	0	0	1	1	0	0	0	0	0	0	0	0	0	1	0	-1	0	0	0	1	0	0	0	0	0	0	0	1	0	0	0
ACTL7B	0	0	0	0	0	1	1	0	0	0	0	0	0	0	0	0	1	0	-1	0	0	0	1	0	0	0	0	0	0	0	1	0	0	0
ACTL8	-1	0	0	-1	0	0	0	0	0	0	-1	0	0	0	0	0	0	0	0	-1	0	-1	0	-1	0	-1	0	0	0	0	-1	0	0	0
ACTL9	-1	0	0	0	0	0	0	0	0	0	0	0	0	0	-1	0	0	0	0	0	0	0	0	-1	0	-1	0	1	0	-1	0	0	-1	-1
ACTN1	0	0	0	0	0	0	0	0	0	0	0	0	0	0	-1	0	-1	0	0	0	0	-1	0	0	0	-1	1	1	0	0	-1	0	-1	-1
ACTN1-AS1	0	0	0	0	0	0	0	0	0	0	0	0	0	0	-1	0	-1	0	0	0	0	-1	0	0	0	-1	1	1	0	0	-1	0	-1	-1
ACTN2	0	0	0	1	0	1	0	1	0	0	1	0	0	0	0	0	0	0	0	-1	0	-1	0	-1	0	1	0	0	0	0	0	0	0	0
ACTN3	1	0	0	0	0	0	0	1	0	1	0	0	0	0	1	1	0	0	0	1	0	0	0	0	0	0	0	0	1	0	1	0	0	1
ACTN4	0	0	0	0	0	1	0	0	0	0	0	0	0	0	1	-1	0	0	0	0	0	0	0	-1	0	-1	0	1	0	0	1	0	1	1
ACTR10	0	0	0	0	0	0	0	0	0	0	0	0	0	0	-1	0	-1	0	0	0	0	-1	0	0	0	-1	1	0	0	0	-1	0	-1	-1
ACTR1A	0	0	0	0	0	0	0	1	0	0	0	0	1	0	0	0	0	0	0	0	0	0	0	0	0	-1	0	0	0	0	-1	0	0	0
ACTR1B	1	0	0	0	0	0	1	0	0	1	0	0	0	0	0	1	0	0	0	0	0	-1	0	0	0	0	0	1	0	0	1	0	0	0
ACTR2	1	0	0	0	0	0	0	0	1	1	0	0	0	0	0	0	0	0	0	0	0	0	0	0	0	0	0	1	0	0	1	0	0	0
ACTR3	1	0	0	0	0	0	1	0	0	0	0	0	0	0	0	1	0	0	0	0	0	0	0	0	0	0	0	1	0	0	1	0	0	0
ACTR3B	0	1	0	0	0	0	1	1	0	0	1	1	0	0	1	1	0	0	1	-1	1	0	1	1	0	0	1	0	1	0	1	1	0	1
ACTR3BP5	0	0	0	0	0	-1	0	1	0	0	0	0	0	0	0	0	0	0	0	0	0	0	1	-1	0	-1	0	0	0	0	-1	0	0	0
ACTR3C	0	1	0	0	0	0	1	1	0	0	1	1	0	0	1	1	0	0	1	0	1	0	1	1	0	0	1	0	1	0	1	1	0	1
ACTR5	1	0	0	0	0	1	-1	1	0	1	1	0	0	0	1	1	0	1	0	1	0	1	1	1	1	1	0	1	1	1	1	0	1	1
ACTR6	0	0	0	1	0	0	0	-1	0	0	0	0	0	0	0	0	0	1	0	0	0	0	0	0	0	0	0	0	0	0	0	1	0	0
ACTR8	-1	0	0	0	0	-1	0	0	0	0	0	-1	0	0	-1	0	0	0	0	0	0	0	0	-1	0	0	0	0	0	-1	0	0	0	-1
ACTRT2	-1	0	0	-1	0	0	1	0	0	0	0	0	0	0	0	0	0	0	0	-1	0	-1	0	-1	0	-1	0	0	0	0	-1	0	0	0
ACTRT3	1	0	0	0	0	1	1	1	0	0	1	0	0	0	1	1	0	0	0	0	0	1	0	1	0	0	0	0	0	0	1	0	0	1
ACVR1	1	0	0	0	0	0	0	0	0	0	0	0	0	0	0	1	0	0	0	0	0	0	0	0	0	-1	0	0	0	0	1	0	0	0
ACVR1B	1	0	0	1	0	0	0	1	0	0	0	0	0	0	0	0	0	0	0	0	0	0	0	0	0	0	0	0	1	0	0	1	0	0
ACVR1C	1	0	0	0	0	0	0	0	0	0	0	0	0	0	0	1	0	0	0	0	0	0	0	0	0	-1	0	0	0	0	1	0	0	0
ACVR2A	1	0	0	0	0	0	0	0	0	0	0	0	0	0	0	1	0	0	0	-1	0	0	0	0	0	0	0	0	0	0	1	0	0	0
ACVR2B	-1	0	0	0	0	-1	0	0	0	0	0	0	0	0	-1	0	0	0	0	0	0	0	0	-1	0	0	0	0	0	-1	0	0	0	-1
ACVR2B-AS1	-1	0	0	0	0	-1	0	0	0	0	0	0	0	0	-1	0	0	0	0	0	0	0	0	-1	0	0	0	0	0	-1	0	0	0	-1
ACVRL1	1	0	0	1	0	0	0	1	0	0	0	0	0	0	0	0	0	0	0	0	0	0	0	0	0	0	0	0	1	0	0	1	0	0
ACY1	-1	0	0	0	0	-1	0	0	0	0	0	0	0	0	-1	0	0	0	0	0	0	0	0	-1	0	0	0	0	0	-1	0	0	0	-1
ACY3	1	0	0	0	0	0	0	1	1	1	0	0	0	0	1	1	0	0	0	1	0	0	0	0	0	0	0	0	1	0	1	-1	1	1
ACYP1	0	0	0	0	0	0	0	0	0	0	0	0	0	0	-1	0	-1	0	0	0	0	-1	0	0	0	-1	1	1	0	0	-1	0	-1	-1
ACYP2	0	0	0	0	0	0	1	0	1	1	0	0	0	0	0	0	0	0	0	0	0	0	0	0	0	0	0	1	0	0	1	0	0	0
ADA	1	0	0	0	0	1	-1	1	0	1	1	0	0	0	1	1	0	1	0	1	0	1	1	1	1	1	0	1	1	1	1	0	1	1
ADAD1	-1	0	0	0	0	0	0	0	0	-1	-1	0	0	0	0	0	0	0	0	-1	0	-1	0	-1	-1	-1	0	-1	-1	0	-1	0	0	1
ADAD2	0	0	0	0	0	0	0	0	0	0	-1	0	1	0	0	-1	-1	0	0	0	0	0	0	-1	0	0	0	0	0	0	-1	0	0	0
ADAL	0	0	0	0	0	1	0	0	0	0	0	0	0	0	1	1	0	0	0	1	1	0	0	-1	-1	0	0	-1	0	0	-1	0	0	1
ADAM10	0	0	1	0	0	1	1	1	0	0	0	0	0	0	1	1	0	0	0	1	1	0	0	-1	-1	0	-1	-1	0	0	-1	0	0	1
ADAM11	0	0	0	0	0	1	0	1	0	1	0	0	0	0	0	0	1	0	0	0	0	1	0	0	0	-1	0	0	0	0	0	0	0	0
ADAM12	0	0	0	0	0	0	0	1	0	0	0	0	1	0	0	0	0	0	0	0	0	0	0	0	0	-1	0	0	0	0	-1	0	0	0
ADAM15	0	0	0	1	0	1	1	1	0	0	0	0	0	0	0	0	0	0	0	0	0	0	0	-1	0	1	0	0	0	0	0	0	0	0
ADAM17	0	0	0	0	0	0	1	0	1	1	0	0	0	0	0	0	0	0	0	0	0	0	0	0	0	0	0	1	0	0	1	0	0	0
ADAM18	-1	0	0	0	0	-1	0	0	0	0	1	0	0	0	-1	0	0	0	0	0	0	0	0	1	-1	1	0	0	0	1	0	0	-1	-1
ADAM19	1	0	0	0	0	0	0	0	0	0	0	0	0	0	0	1	1	0	0	1	0	0	0	1	0	0	0	1	0	1	-1	1	0	0
ADAM1A	0	0	0	1	0	0	0	1	0	0	0	0	0	0	0	0	0	1	0	0	0	0	0	0	0	-1	0	0	0	0	0	1	0	0
ADAM2	-1	0	0	0	0	-1	0	0	0	0	1	0	0	0	-1	0	0	0	0	0	0	0	0	1	-1	1	0	0	0	0	0	0	0	-1
ADAM20	0	0	0	0	0	0	0	0	0	0	0	0	0	0	-1	0	-1	0	0	0	0	-1	0	0	0	-1	1	1	0	0	-1	0	-1	-1
ADAM20P1	0	0	0	0	0	0	0	0	0	0	0	0	0	0	-1	0	-1	0	0	0	0	-1	0	0	0	-1	1	1	0	0	-1	0	-1	-1
ADAM21	0	0	0	0	0	0	0	0	0	0	0	0	0	0	-1	0	-1	0	0	0	0	-1	0	0	0	-1	1	1	0	0	-1	0	-1	-1
ADAM21P1	0	0	0	0	0	0	0	0	0	0	0	0	0	0	-1	0	-1	0	0	0	0	-1	0	0	0	-1	1	1	0	0	-1	0	-1	-1
ADAM22	0	1	0	0	0	0	1	1	0	0	1	1	0	0	0	0	0	0	1	0	1	0	0	0	0	0	1	1	1	0	1	1	0	0
ADAM23	1	0	0	0	0	0	0	0	0	0	0	0	0	0	0	0	0	0	0	0	0	0	0	0	0	0	0	0	0	0	1	0	0	0
ADAM28	-1	0	0	0	0	-1	0	0	0	0	-1	0	0	0	-1	0	-1	0	0	0	0	0	0	-1	-1	-1	0	0	0	-1	0	0	-1	-1
ADAM29	-1	0	0	0	0	0	0	0	-1	-1	-1	0	0	0	-1	-1	0	0	0	0	0	-1	0	-1	-1	-1	0	-1	0	0	-1	0	1	-1
ADAM30	-1	0	0	0	0	-1	1	0	0	0	0	0	0	0	0	0	0	0	0	0	0	-1	0	-1	0	0	0	0	0	0	0	0	0	0
ADAM32	-1	0	0	0	0	-1	0	0	0	0	1	0	0	0	-1	0	0	0	0	0	0	0	0	1	-1	1	0	0	0	1	0	0	-1	-1
ADAM33	1	0	0	0	0	1	0	0	0	1	-1	0	0	0	0	1	0	0	0	1	0	1	1	-1	1	1	0	1	1	-1	0	0	1	1
ADAM3A	-1	0	0	0	0	-1	0	0	0	0	1	0	0	0	-1	0	0	0	0	0	0	0	0	1	-1	1	0	0	0	1	0	0	-1	-1
ADAM5	-1	0	0	0	0	-1	0	0	0	0	1	0	0	0	-1	0	0	0	0	0	0	0	0	1	-1	1	0	0	0	1	0	0	-1	-1
ADAM7	-1	0	0	0	0	-1	0	0	0	0	-1	0	0	0	-1	0	-1	0	0	0	0	0	0	-1	-1	-1	0	0	0	-1	0	0	-1	-1
ADAM8	1	0	0	0	0	0	1	1	0	0	0	0	-1	0	0	0	0	0	0	0	0	0	0	0	0	-1	0	0	0	0	-1	0	0	0
ADAM9	-1	0	0	0	0	-1	0	0	0	0	1	0	0	0	-1	0	0	0	0	0	0	0	0	1	-1	1	0	0	0	1	0	0	0	-1
ADAMDEC1	-1	0	0	0	0	-1	0	0	0	0	-1	0	0	0	-1	0	-1	0	0	0	0	0	0	-1	-1	-1	0	0	0	-1	0	0	-1	-1
ADAMTS1	0	0	0	0	0	0	0	0	0	0	-1	0	0	0	-1	-1	-1	-1	0	-1	0	-1	0	0	0	0	0	1	0	0	-1	0	0	-1
ADAMTS10	-1	0	0	0	0	0	0	0	0	0	0	0	0	0	-1	0	0	0	0	0	0	0	0	-1	0	-1	0	1	0	-1	0	0	-1	-1
ADAMTS12	0	0	0	0	0	1	0	1	0	0	0	0	0	0	1	1	1	0	1	-1	0	0	0	1	0	0	0	0	1	0	0	0	0	1
ADAMTS13	0	0	0	0	0	1	1	0	0	0	0	0	0	0	0	0	1	0	0	0	0	0	1	1	0	0	0	0	0	0	1	0	0	0
ADAMTS14	1	0	0	0	0	0	0	1	0	0	0	0	0	0	0	0	0	0	0	0	0	0	0	0	0	-1	1	0	1	0	-1	0	0	0
ADAMTS15	1	0	0	0	0	0	0	1	1	1	0	0	0	0	1	1	0	0	0	1	0	0	0	0	0	0	0	0	0	1	1	0	0	1
ADAMTS16	0	0	0	0	0	1	0	1	0	0	0	0	0	0	1	1	1	-1	1	-1	0	0	0	1	0	0	0	1	1	0	0	0	0	1
ADAMTS17	0	1	1	0	0	1	-1	1	0	0	0	0	0	0	1	0	0	0	0	1	1	0	0	0	-1	1	0	0	0	0	0	0	0	1
ADAMTS18	0	0	0	0	0	0	1	0	0	0	-1	0	0	0	0	0	-1	0	0	0	0	0	0	-1	0	0	0	0	1	0	-1	0	1	0
ADAMTS19	1	0	0	0	0	1	0	0	0	0	0	0	0	0	0	1	0	0	0	1	0	-1	0	1	0	0	0	1	0	1	-1	1	0	0
ADAMTS2	1	0	0	0	0	1	0	0	0	0	0	0	0	0	0	1	1	0	0	0	0	0	0	1	0	0	0	1	0	1	-1	1	0	0
ADAMTS20	1	0	0	1	0	0	1	1	0	1	0	0	0	0	0	0	0	0	0	0	0	0	0	0	0	0	0	0	0	0	0	1	0	0
ADAMTS3	-1	0	0	0	0	0	0	0	0	-1	0	0	0	0	0	0	0	0	0	0	0	-1	0	-1	-1	-1	0	-1	0	0	-1	0	0	1
ADAMTS4	0	0	0	1	0	1	1	1	0	0	0	0	0	0	0	0	0	0	0	0	0	0	0	-1	0	1	0	0	0	0	0	0	0	0
ADAMTS5	0	0	0	0	0	0	0	0	0	0	-1	0	0	0	-1	-1	-1	-1	0	-1	0	-1	0	0	0	0	0	1	0	0	-1	0	0	-1
ADAMTS6	0	0	0	0	0	1	0	0	0	0	0	0	0	0	0	0	1	0	0	-1	0	0	0	1	0	0	0	0	1	0	-1	1	0	0
ADAMTS7	0	0	1	0	0	1	1	1	0	0	0	0	0	0	1	0	0	0	0	1	1	0	0	0	-1	1	0	0	0	0	0	0	0	1
ADAMTS7P1	0	0	1	0	0	1	1	1	0	0	0	0	0	0	1	0	0	0	0	1	1	0	0	1	-1	1	0	0	0	0	0	0	0	1
ADAMTS8	1	0	0	0	0	0	0	1	1	1	0	0	0	0	1	1	0	0	0	1	0	0	0	0	0	0	0	0	0	1	1	0	0	1
ADAMTS9	0	0	0	0	0	-1	0	0	-1	0	0	0	0	0	-1	0	0	0	0	0	0	0	0	-1	0	0	0	0	0	-1	0	0	0	-1
ADAMTS9-AS2	0	0	0	0	0	-1	0	0	-1	0	0	0	0	0	-1	0	0	0	0	0	0	0	0	-1	0	0	0	0	0	-1	0	0	0	-1
ADAMTSL1	-1	0	0	0	0	0	0	0	0	0	0	0	0	0	0	0	1	0	0	0	0	0	0	-1	0	-1	0	0	0	0	-1	0	-1	0
ADAMTSL2	0	0	0	0	0	1	1	0	0	0	0	0	0	0	0	0	1	0	0	0	0	0	1	1	0	0	0	0	0	0	1	0	0	0
ADAMTSL3	0	0	1	0	0	1	1	1	0	0	0	0	0	0	1	0	0	0	0	1	1	0	0	1	-1	1	0	0	0	0	0	0	0	1
ADAMTSL5	-1	0	0	0	0	-1	0	0	0	0	0	0	0	0	-1	0	0	0	0	0	0	0	0	-1	0	-1	0	-1	0	-1	0	0	-1	-1
ADAP1	0	1	1	0	0	0	-1	1	0	0	1	1	0	0	0	1	1	0	1	0	1	0	0	1	0	1	1	1	1	0	1	0	-1	0
ADAP2	0	0	0	0	0	1	0	1	0	1	0	0	0	0	1	0	1	0	0	0	0	1	0	0	0	-1	0	0	0	0	0	0	0	1
ADAR	0	0	0	1	0	1	1	1	0	0	0	0	0	0	0	0	0	0	0	0	0	0	0	-1	0	1	0	0	0	0	0	0	0	0
ADARB1	0	0	0	0	0	-1	0	0	0	0	0	0	0	0	-1	0	-1	0	1	-1	0	-1	0	0	0	0	0	1	0	0	-1	0	0	-1
ADARB2	0	0	1	0	0	0	1	1	0	0	-1	0	0	0	0	0	0	0	0	0	0	0	1	-1	0	-1	0	-1	0	0	-1	0	0	0
ADARB2-AS1	0	0	1	0	0	0	1	1	0	0	-1	0	0	0	0	0	0	0	0	0	0	0	1	-1	0	-1	0	-1	0	0	-1	0	0	0
ADAT1	0	0	0	0	0	0	1	0	0	0	-1	0	0	0	0	0	-1	0	0	0	0	0	0	-1	0	0	0	0	1	0	-1	0	0	0
ADAT2	0	-1	0	0	0	-1	0	-1	0	0	1	0	0	0	-1	0	1	0	0	-1	0	0	0	1	0	-1	0	-1	0	0	0	0	-1	0
ADAT3	-1	0	0	0	0	-1	0	0	0	0	0	0	0	0	-1	0	0	0	0	0	0	0	0	-1	0	-1	0	-1	0	-1	0	0	-1	-1
ADCK1	0	0	0	0	0	0	0	0	0	0	0	0	0	0	-1	0	-1	0	0	0	0	-1	0	0	0	-1	1	1	0	0	-1	0	-1	-1
ADCK2	0	1	0	0	0	0	1	1	0	0	1	1	0	0	0	1	0	0	1	0	1	0	1	1	0	0	1	0	1	0	1	1	0	0
ADCK5	-1	0	0	0	1	0	0	0	0	0	1	0	1	0	1	-1	-1	1	0	0	0	0	1	0	1	1	0	0	0	0	0	0	1	1
ADCY1	0	1	0	0	0	0	0	1	0	0	1	1	0	0	0	1	0	0	1	0	1	0	0	1	0	1	1	1	1	0	1	0	1	0
ADCY10	0	0	0	1	0	1	0	1	0	0	0	0	0	0	0	0	0	0	0	0	0	0	0	-1	0	1	0	0	0	0	0	0	0	0
ADCY10P1	0	-1	0	0	0	1	0	1	0	0	0	0	0	0	0	0	-1	0	0	-1	0	0	0	-1	0	-1	0	-1	0	0	0	0	0	0
ADCY2	0	0	0	0	0	1	0	1	0	0	0	0	0	0	1	1	1	-1	1	-1	0	0	0	1	0	0	0	1	1	0	0	0	0	1
ADCY3	0	0	0	0	0	0	1	0	0	1	0	0	0	0	0	0	0	0	0	0	0	0	0	0	0	0	0	1	1	0	1	0	0	0
ADCY4	0	0	-1	0	0	0	0	0	0	0	0	0	0	0	-1	0	-1	0	0	0	0	-1	0	0	0	-1	0	0	0	0	-1	0	-1	-1
ADCY5	0	0	0	0	0	1	1	1	0	0	0	0	0	0	1	1	0	0	0	0	0	1	0	1	0	0	0	0	0	0	1	0	0	1
ADCY6	1	0	0	1	0	0	0	1	0	1	0	0	0	0	0	0	0	0	0	0	0	0	0	0	0	0	0	0	1	0	0	1	0	0
ADCY7	0	0	0	0	0	0	1	0	0	0	0	0	0	0	0	0	0	0	0	0	0	0	0	-1	0	0	0	0	1	0	-1	0	0	0
ADCY8	-1	0	0	0	1	1	-1	0	0	0	1	0	1	0	1	0	-1	1	0	0	0	0	1	0	1	1	0	0	0	0	0	0	1	1
ADCY9	-1	0	-1	0	0	0	0	0	0	0	0	0	0	0	0	-1	0	0	0	0	0	0	0	0	0	0	0	0	0	0	-1	0	-1	0
ADCYAP1	1	-1	0	0	0	-1	1	0	0	-1	-1	0	0	0	1	-1	-1	-1	0	-1	0	0	0	-1	-1	0	0	0	0	-1	-1	0	0	1
ADCYAP1R1	0	1	0	0	0	0	0	1	0	0	1	1	0	0	0	1	1	0	1	0	1	0	0	1	0	1	1	1	1	0	1	1	-1	0
ADD1	-1	0	0	0	0	0	0	0	0	-1	0	0	0	0	0	-1	0	0	0	0	0	-1	0	0	0	-1	0	-1	0	0	-1	0	-1	1
ADD2	1	0	0	0	0	0	0	0	1	1	0	0	0	0	0	0	0	0	0	0	0	0	0	0	0	0	0	1	0	0	1	0	0	0
ADD3	0	0	0	0	0	0	0	1	0	0	0	0	1	0	0	0	0	0	0	0	0	0	0	0	0	-1	0	0	0	0	-1	0	0	0
ADD3-AS1	0	0	0	0	0	0	0	1	0	0	0	0	1	0	0	0	0	0	0	0	0	0	0	0	0	-1	0	0	0	0	-1	0	0	0
ADGB	0	-1	0	0	0	-1	0	-1	0	0	1	0	0	0	-1	0	1	0	0	-1	0	0	0	1	0	-1	0	-1	0	0	0	0	-1	0
ADGRA1	1	0	0	0	0	0	1	1	0	0	0	0	-1	0	0	0	0	0	0	0	0	0	0	0	0	-1	0	0	0	0	-1	0	0	0
ADGRA2	-1	0	0	0	0	-1	0	0	0	0	1	0	0	0	-1	0	0	0	0	0	0	0	0	1	-1	1	0	0	0	-1	0	0	-1	-1
ADGRA3	-1	0	0	0	0	0	0	0	0	-1	0	0	0	0	0	-1	0	0	0	0	0	-1	0	0	0	-1	0	-1	0	0	-1	0	-1	1
ADGRB1	-1	0	0	0	1	0	0	0	0	0	1	0	1	0	1	-1	-1	1	0	0	0	0	1	0	1	1	0	0	0	0	0	0	1	1
ADGRB2	-1	0	0	0	0	0	0	0	0	0	-1	0	0	0	0	0	0	0	0	-1	0	-1	0	-1	0	-1	0	0	0	0	-1	0	0	0
ADGRB3	0	-1	0	0	0	-1	0	-1	0	1	-1	0	0	0	0	-1	0	0	0	-1	0	0	0	-1	0	-1	0	-1	0	0	0	0	-1	0
ADGRD1	0	0	0	1	0	1	0	1	0	0	1	0	0	0	0	0	0	1	0	1	0	0	0	0	0	-1	0	0	0	0	0	1	0	0
ADGRD2	0	0	0	0	0	1	0	0	0	0	0	0	0	0	0	0	1	0	0	0	0	0	1	-1	0	0	0	0	0	0	1	0	0	0
ADGRE1	-1	0	0	0	0	0	0	0	0	0	0	0	0	0	-1	0	0	0	0	0	0	0	0	-1	0	-1	0	0	0	-1	0	0	-1	-1
ADGRE2	-1	0	0	0	0	0	0	0	0	0	0	0	0	0	-1	0	0	0	0	0	0	0	0	-1	0	-1	0	1	0	-1	0	0	-1	-1
ADGRE3	-1	0	0	0	0	0	0	0	0	0	0	0	0	0	-1	0	0	0	0	0	0	0	0	-1	0	-1	0	1	0	-1	0	0	-1	-1
ADGRE4P	-1	0	0	0	0	0	0	0	0	0	0	0	0	0	-1	0	0	0	0	0	0	0	0	-1	0	-1	0	0	0	-1	0	0	-1	-1
ADGRE5	-1	0	0	0	0	0	0	0	0	0	0	0	0	0	-1	0	0	0	0	0	0	0	0	-1	0	-1	0	1	0	0	0	0	-1	-1
ADGRF1	0	-1	0	0	0	-1	0	1	0	0	0	0	0	0	0	0	-1	0	0	-1	0	0	0	-1	0	-1	0	-1	0	0	0	0	0	0
ADGRF2	0	-1	0	0	0	-1	0	1	0	0	0	0	0	0	0	0	-1	0	0	-1	0	0	0	-1	0	-1	0	-1	0	0	0	0	0	0
ADGRF3	0	0	0	0	0	0	1	0	0	1	0	0	0	0	0	0	0	0	0	0	0	0	0	0	0	0	0	1	0	0	1	0	0	0
ADGRF4	0	-1	0	0	0	-1	0	1	0	0	0	0	0	0	0	0	-1	0	0	-1	0	0	0	-1	0	-1	0	-1	0	0	0	0	0	0
ADGRF5	0	-1	0	0	0	-1	0	1	0	0	0	0	0	0	0	0	-1	0	0	-1	0	0	0	-1	0	-1	0	-1	0	0	0	0	0	0
ADGRG1	0	0	0	0	0	0	1	0	0	0	0	0	0	0	0	0	-1	0	0	0	0	0	0	-1	0	0	0	0	1	0	-1	0	0	0
ADGRG3	0	0	0	0	0	0	1	0	0	0	0	0	0	0	0	0	-1	0	0	0	0	0	0	-1	0	0	0	0	1	0	-1	0	0	0
ADGRG5	0	0	0	0	0	0	1	0	0	0	0	0	0	0	0	0	-1	0	0	0	0	0	0	-1	0	0	0	0	1	0	-1	0	0	0
ADGRG6	0	-1	0	0	0	-1	0	-1	0	0	1	0	0	0	-1	0	1	0	0	-1	0	0	0	1	0	-1	0	-1	0	0	0	0	-1	0
ADGRG7	0	0	0	0	0	1	0	1	0	0	0	0	0	0	1	1	0	0	0	0	0	1	0	1	0	0	0	0	0	0	1	0	0	1
ADGRL1	-1	0	0	0	0	0	0	0	0	0	0	0	0	0	-1	0	0	0	0	0	0	0	0	-1	0	-1	0	1	0	0	0	0	-1	-1
ADGRL2	-1	0	0	0	0	-1	0	0	0	0	0	0	0	0	0	0	0	0	0	-1	0	-1	0	-1	0	-1	0	0	0	-1	-1	0	0	0
ADGRL3	-1	0	0	0	0	0	0	0	0	-1	0	0	0	0	0	0	0	0	0	0	0	-1	0	-1	-1	-1	0	-1	0	0	-1	0	0	1
ADGRL4	-1	0	0	0	0	-1	0	0	0	0	0	0	0	0	0	0	0	0	0	-1	0	-1	0	-1	0	-1	0	0	0	-1	-1	0	0	0
ADGRV1	0	0	0	0	0	1	0	0	0	0	0	0	0	0	0	-1	1	0	0	-1	0	-1	0	1	0	0	0	0	1	1	-1	1	0	0
ADH1A	-1	0	0	0	0	0	0	0	0	-1	-1	0	0	0	0	-1	0	0	0	0	0	-1	0	-1	-1	-1	0	-1	-1	0	-1	0	0	1
ADH1B	-1	0	0	0	0	0	0	0	0	-1	-1	0	0	0	0	-1	0	0	0	0	0	-1	0	-1	-1	-1	0	-1	-1	0	-1	0	0	1
ADH1C	-1	0	0	0	0	0	0	0	0	-1	-1	0	0	0	0	-1	0	0	0	0	0	-1	0	-1	-1	-1	0	-1	-1	0	-1	0	0	1
ADH4	-1	0	0	0	0	0	0	0	0	-1	-1	0	0	0	0	-1	0	0	0	0	0	-1	0	-1	-1	-1	0	-1	-1	0	-1	0	0	1
ADH5	-1	0	0	0	0	0	0	0	0	-1	-1	0	0	0	0	-1	0	0	0	0	0	-1	0	-1	-1	-1	0	-1	-1	0	-1	0	0	1
ADH6	-1	0	0	0	0	0	0	0	0	-1	-1	0	0	0	0	-1	0	0	0	0	0	-1	0	-1	-1	-1	0	-1	-1	0	-1	0	0	1
ADH7	-1	0	0	0	0	0	0	0	0	-1	-1	0	0	0	0	-1	0	0	0	0	0	-1	0	-1	-1	-1	0	-1	-1	0	-1	0	0	1
ADHFE1	-1	0	0	0	0	0	0	0	0	0	1	0	0	0	1	-1	0	0	0	-1	0	0	1	0	1	1	0	0	0	0	0	0	1	0
ADI1	0	0	0	0	0	0	1	0	1	1	0	0	0	0	0	-1	0	0	0	0	0	0	0	0	0	0	0	1	0	0	1	0	0	0
ADIG	1	0	0	0	0	1	-1	1	0	1	1	0	0	0	1	1	0	1	0	1	0	1	1	1	1	1	0	1	1	1	1	0	1	1
ADIPOQ	1	0	0	0	0	1	1	1	0	0	0	0	0	0	0	1	0	0	0	-1	0	1	0	1	1	0	0	0	1	0	1	0	0	0
ADIPOQ-AS1	1	0	0	0	0	1	1	1	0	0	0	0	0	0	0	1	0	0	0	-1	0	1	0	1	1	0	0	0	1	0	1	0	0	0
ADIPOR1	0	0	0	1	0	1	0	1	0	0	0	0	0	0	0	0	0	0	0	0	0	-1	0	-1	0	1	0	0	0	0	0	0	0	0
ADIPOR2	1	0	0	1	0	0	1	1	0	1	-1	0	0	0	0	1	0	0	0	1	0	0	0	0	1	-1	0	1	1	0	0	0	0	0
ADIRF	0	0	0	0	0	0	0	1	0	0	0	0	0	0	0	0	0	0	0	0	0	0	0	0	0	-1	0	0	1	0	-1	0	0	0
ADK	0	0	0	0	0	0	0	1	0	0	0	0	0	0	0	0	0	0	0	0	0	0	0	0	0	-1	1	0	1	0	-1	0	0	0
ADM	0	0	0	0	0	0	0	0	0	1	0	0	0	0	1	0	0	0	0	1	0	0	0	0	0	0	0	0	1	-1	1	0	0	1
ADM2	-1	-1	0	0	0	0	1	-1	0	-1	-1	0	0	0	-1	0	-1	0	0	-1	0	0	0	-1	-1	-1	0	0	0	-1	-1	0	-1	-1
ADM5	-1	0	0	0	0	0	0	0	0	0	0	0	0	0	1	1	0	0	0	0	0	0	0	-1	-1	-1	0	1	0	0	-1	0	0	1
ADNP	1	0	0	0	0	1	0	1	0	1	1	0	0	0	1	1	0	1	0	1	0	1	1	1	1	1	0	1	1	1	1	0	1	1
ADNP2	-1	-1	-1	0	-1	-1	0	0	0	-1	-1	0	0	0	-1	-1	-1	-1	0	-1	0	0	0	-1	-1	-1	0	-1	-1	-1	-1	0	-1	-1
ADO	1	0	0	0	0	0	0	1	0	0	0	0	0	0	0	0	0	0	0	0	0	0	0	0	0	-1	0	0	1	0	-1	0	0	0
ADORA1	0	0	0	1	0	1	0	1	0	0	0	0	0	0	0	0	0	0	0	0	0	-1	0	-1	0	1	0	0	0	0	0	0	0	0
ADORA2A	-1	-1	0	0	0	0	0	-1	0	-1	-1	0	0	0	-1	0	0	0	0	-1	0	0	0	-1	-1	-1	0	0	0	1	-1	0	1	-1
ADORA2A-AS1	-1	-1	0	0	0	0	0	-1	0	-1	-1	0	0	0	-1	0	0	0	0	-1	0	0	0	-1	-1	-1	0	0	0	1	-1	0	1	-1
ADORA2B	-1	-1	0	0	0	0	1	0	0	-1	-1	0	0	0	-1	0	-1	0	0	-1	0	-1	0	-1	-1	-1	0	0	0	-1	0	0	-1	-1
ADORA3	-1	0	0	0	0	-1	1	0	0	0	0	0	0	0	0	0	0	0	0	0	0	-1	0	-1	0	0	0	0	0	-1	-1	0	0	0
ADPGK	0	0	1	0	0	1	1	1	0	0	0	0	0	0	1	1	0	0	0	1	1	0	0	0	-1	1	0	0	0	0	-1	0	0	1
ADPGK-AS1	0	0	1	0	0	1	1	1	0	0	0	0	0	0	1	1	0	0	0	1	1	0	0	0	-1	1	0	0	0	0	-1	0	0	1
ADPRH	0	0	0	0	0	1	1	1	0	0	0	0	0	0	1	1	0	0	0	0	0	1	0	1	0	0	0	0	0	0	1	0	0	1
ADPRHL1	0	0	0	1	0	-1	-1	1	1	0	0	1	0	0	1	0	1	0	0	1	0	1	0	0	1	1	0	0	1	-1	1	0	0	1
ADPRHL2	-1	0	0	0	0	0	0	0	0	0	0	0	0	0	0	0	0	0	0	-1	0	-1	0	-1	0	-1	0	0	0	0	-1	0	0	0
ADPRM	-1	-1	0	0	0	0	0	0	0	-1	-1	0	0	0	-1	0	-1	0	0	-1	0	-1	0	-1	-1	-1	0	0	1	-1	0	0	-1	-1
ADRA1A	-1	0	0	0	0	-1	0	0	0	0	-1	0	0	0	-1	0	0	0	0	0	0	0	0	-1	-1	-1	0	0	0	-1	0	0	-1	-1
ADRA1B	1	0	0	0	0	0	0	0	0	0	0	0	0	0	0	1	1	0	0	1	0	0	0	1	0	0	0	1	0	1	-1	1	0	0
ADRA1D	1	0	0	0	0	1	0	0	0	1	-1	0	0	0	0	1	0	0	0	1	0	1	1	-1	1	1	0	1	1	-1	0	0	1	1
ADRA2A	0	0	0	0	0	0	0	1	0	0	0	0	1	0	0	0	0	0	0	0	0	0	0	0	0	-1	0	0	0	0	-1	0	0	0
ADRA2B	1	0	0	0	0	0	1	0	0	1	0	0	0	0	0	1	0	0	0	0	0	0	0	0	0	0	0	1	0	0	1	0	0	0
ADRA2C	-1	0	0	0	0	0	0	0	0	-1	0	0	0	0	0	-1	0	0	0	0	0	-1	0	0	0	-1	0	-1	0	0	-1	0	-1	1
ADRB1	0	0	0	0	0	0	0	1	0	0	0	0	1	0	0	0	0	0	0	0	0	0	0	0	0	-1	0	0	0	0	-1	0	0	0
ADRB2	1	0	0	0	0	0	0	0	0	0	0	0	0	0	0	1	1	0	0	1	0	0	0	1	0	0	0	1	0	1	-1	1	0	0
ADRM1	1	0	0	0	0	1	0	1	0	1	1	0	0	0	1	1	0	1	0	1	0	1	1	1	1	1	0	1	1	1	1	0	1	1
ADSL	-1	-1	0	0	0	0	0	-1	0	-1	-1	0	0	0	-1	0	-1	0	0	-1	0	0	0	-1	-1	-1	0	0	0	-1	-1	0	-1	-1
ADSS	0	0	0	1	0	1	0	1	0	0	1	0	0	0	0	0	0	0	0	-1	0	0	0	-1	0	1	0	0	0	0	0	0	0	0
ADSSL1	0	0	0	0	0	-1	0	0	0	0	0	0	0	0	-1	-1	-1	0	0	0	0	-1	0	0	0	-1	1	1	0	1	-1	0	-1	-1
ADTRP	0	-1	-1	0	0	0	0	1	0	0	-1	0	0	0	0	0	-1	-1	0	-1	0	0	0	-1	0	-1	0	-1	0	0	0	0	0	0
AEBP1	0	1	0	0	0	0	0	1	0	0	1	1	0	0	0	1	0	0	1	0	1	0	0	1	0	1	1	1	1	0	1	0	1	0
AEBP2	1	0	0	1	0	0	1	1	0	1	-1	0	0	0	0	1	0	0	0	1	0	0	0	0	1	0	0	1	1	0	0	0	0	0
AEN	0	1	1	0	0	1	1	1	0	0	0	0	0	0	1	0	0	0	0	1	1	0	0	0	-1	1	0	0	0	0	0	0	0	1
AES	-1	0	0	0	0	-1	0	0	0	0	0	0	0	0	-1	0	0	0	0	0	0	0	0	-1	0	-1	0	-1	0	-1	0	0	-1	-1
AFAP1	-1	0	0	0	0	0	0	0	0	-1	0	0	0	0	0	-1	0	0	0	0	0	-1	0	0	0	-1	0	-1	0	0	-1	0	-1	1
AFAP1-AS1	-1	0	0	0	0	0	0	0	0	-1	0	0	0	0	0	-1	0	0	0	0	0	-1	0	0	0	-1	0	-1	0	0	-1	0	-1	1
AFAP1L1	1	0	0	0	0	0	0	0	0	0	0	0	0	0	0	1	1	0	0	1	0	0	0	1	0	0	0	1	0	1	-1	1	0	0
AFAP1L2	0	0	0	0	0	0	0	1	0	0	0	0	1	0	0	0	0	0	0	0	0	0	0	0	0	-1	0	0	0	0	-1	0	0	0
AFDN	0	-1	0	0	0	-1	0	-1	0	0	0	0	0	0	0	-1	1	0	0	-1	0	-1	0	1	0	-1	0	-1	-1	0	0	0	-1	0
AFDN-AS1	0	-1	0	0	0	-1	0	-1	0	0	0	0	0	0	0	-1	1	0	0	-1	0	-1	0	1	0	-1	0	-1	-1	0	0	0	-1	0
AFF1	-1	0	0	0	0	0	0	0	0	-1	-1	0	0	0	0	0	0	0	0	0	0	-1	0	-1	-1	-1	0	-1	0	0	-1	0	0	1
AFF3	1	0	0	0	0	0	1	0	0	1	0	0	0	0	0	1	0	0	0	0	0	0	0	0	0	0	0	1	0	0	1	0	0	0
AFF4	1	0	0	0	0	1	0	0	0	0	0	0	0	0	0	1	1	0	0	1	0	-1	0	1	0	0	0	1	0	1	-1	1	0	0
AFG3L1P	0	0	0	0	0	0	0	0	0	0	0	0	1	0	0	-1	-1	0	0	0	0	0	0	-1	0	0	0	-1	0	0	-1	0	0	0
AFG3L2	1	-1	0	0	1	-1	0	0	0	-1	-1	0	0	0	1	-1	-1	-1	0	-1	0	0	0	-1	-1	-1	0	0	0	-1	-1	0	0	1
AFM	-1	0	0	0	0	0	0	0	0	-1	0	0	0	0	0	0	0	0	0	0	0	-1	0	-1	-1	-1	0	-1	0	0	-1	0	0	1
AFMID	0	-1	0	0	0	1	0	1	0	1	-1	0	1	0	0	0	1	0	0	0	0	1	0	0	0	-1	0	0	1	1	0	0	0	0
AFP	-1	0	0	0	0	0	0	0	0	-1	0	0	0	0	0	0	0	0	0	0	0	-1	0	-1	-1	-1	0	-1	0	0	-1	0	0	1
AFTPH	1	0	0	0	0	0	0	0	1	1	0	0	0	0	0	0	0	0	0	0	0	0	0	0	0	0	0	1	0	0	1	0	0	0
AGA	-1	0	0	0	0	0	0	0	-1	-1	-1	0	0	0	-1	-1	0	0	0	0	0	-1	0	-1	-1	-1	0	-1	0	0	-1	0	1	-1
AGAP1	-1	0	0	0	0	0	0	0	0	0	0	0	0	0	0	0	0	0	0	0	0	0	0	0	0	0	0	0	0	0	1	0	0	0
AGAP11	0	0	0	0	0	0	0	1	0	0	0	0	0	0	0	0	0	0	0	0	0	0	0	0	0	-1	0	0	1	0	-1	0	0	0
AGAP2	0	0	0	1	0	0	0	1	0	0	0	0	0	0	0	0	0	0	0	0	0	0	0	0	0	0	0	0	0	0	0	1	0	0
AGAP2-AS1	0	0	0	1	0	0	0	1	0	0	0	0	0	0	0	0	0	0	0	0	0	0	0	0	0	0	0	0	0	0	0	1	0	0
AGAP3	0	1	0	0	0	0	1	1	0	0	1	1	0	0	1	1	0	0	1	0	1	0	1	1	0	0	1	0	1	0	1	1	0	1
AGAP4	0	0	0	0	1	0	0	1	0	0	-1	0	0	0	0	1	0	0	0	0	0	0	1	0	0	-1	0	0	1	0	-1	0	0	0
AGAP5	1	0	0	0	0	0	0	1	0	0	0	0	0	0	0	0	0	0	0	0	0	0	0	0	0	-1	1	0	1	0	-1	0	1	0
AGAP6	0	0	0	0	0	0	0	1	0	0	-1	0	0	0	0	0	0	0	0	0	0	0	0	0	0	-1	0	0	1	0	-1	0	0	0
AGAP7P	0	0	0	0	0	0	0	1	0	0	-1	0	0	0	0	0	0	0	0	0	0	0	0	0	0	-1	0	0	1	0	-1	0	0	0
AGAP9	0	0	0	0	0	0	0	1	0	0	-1	0	0	0	0	1	0	0	0	0	0	0	1	0	0	0	0	0	1	0	-1	0	0	0
AGBL1	0	1	1	0	0	1	1	1	0	0	0	0	0	0	1	0	0	0	0	1	1	0	0	0	-1	1	0	0	0	0	0	0	0	1
AGBL1-AS1	0	1	1	0	0	1	1	1	0	0	0	0	0	0	1	0	0	0	0	1	1	0	0	1	-1	1	0	0	0	0	0	0	0	1
AGBL2	0	0	0	0	0	0	0	0	0	1	0	0	0	0	1	0	0	0	0	1	0	0	0	1	0	0	0	0	1	0	1	0	0	1
AGBL3	0	1	0	0	0	0	1	1	0	0	1	1	0	0	0	1	0	0	1	0	1	0	1	1	0	0	1	0	1	0	1	1	0	0
AGBL4	-1	0	0	0	0	0	0	0	0	0	0	0	0	0	0	-1	0	0	0	-1	0	-1	0	-1	0	-1	0	0	0	0	-1	0	0	0
AGBL5	0	0	0	0	0	0	1	0	0	1	0	0	0	0	0	0	0	0	0	0	0	0	0	0	0	0	0	1	0	0	1	0	0	0
AGER	0	-1	1	0	0	0	0	1	0	0	0	0	0	0	0	0	-1	-1	0	-1	0	0	0	-1	0	-1	0	-1	0	-1	0	0	0	0
AGFG1	-1	0	0	0	0	0	0	0	0	0	0	0	0	0	0	0	0	0	0	0	0	0	0	0	0	0	0	0	0	0	1	0	0	0
AGFG2	0	1	0	0	0	0	1	1	0	0	1	1	0	0	0	0	0	0	1	0	1	0	1	0	0	0	1	1	1	0	1	1	0	0
AGGF1	0	0	0	0	0	1	0	1	0	0	0	0	0	0	0	0	1	0	0	-1	0	0	0	1	0	0	0	0	1	1	-1	1	0	0
AGK	0	1	0	0	0	0	1	1	0	0	1	1	0	0	0	1	0	0	1	0	1	0	1	1	0	0	1	0	1	0	1	1	0	0
AGL	-1	0	0	0	0	-1	1	0	0	0	0	0	0	0	0	0	0	0	0	0	0	-1	0	-1	0	-1	0	0	0	-1	-1	0	0	0
AGMAT	-1	0	0	-1	0	0	0	0	0	0	-1	0	0	0	0	0	0	0	0	-1	0	-1	0	-1	0	-1	0	0	0	0	-1	0	0	0
AGMO	0	1	1	0	0	0	-1	1	0	0	1	1	0	0	-1	1	1	0	1	0	1	0	0	1	0	1	1	1	1	0	1	1	1	-1
AGO1	-1	0	0	0	0	0	0	0	0	0	0	0	0	0	0	0	0	0	0	-1	0	-1	0	-1	0	-1	0	0	0	0	-1	0	0	0
AGO2	-1	0	0	0	1	0	0	0	0	0	1	0	1	0	1	-1	-1	1	0	0	0	0	1	0	1	1	0	0	0	0	0	0	1	1
AGO3	-1	0	0	0	0	0	0	0	0	0	0	0	0	0	0	0	0	0	0	-1	0	-1	0	-1	0	-1	0	0	0	0	-1	0	0	0
AGO4	-1	0	0	0	0	0	0	0	0	0	0	0	0	0	0	0	0	0	0	-1	0	-1	0	-1	0	-1	0	0	0	0	-1	0	0	0
AGPAT1	0	-1	1	0	0	0	0	1	0	0	0	0	0	0	0	0	-1	-1	0	-1	0	0	0	-1	0	-1	0	-1	0	-1	0	0	0	0
AGPAT2	0	0	0	0	0	1	1	0	0	0	0	0	0	0	0	0	1	0	0	0	0	0	1	1	0	0	0	0	0	0	1	0	0	0
AGPAT3	0	0	0	0	0	-1	0	0	0	0	0	0	0	0	-1	0	-1	0	1	-1	0	-1	0	0	0	0	0	1	0	0	-1	0	0	-1
AGPAT4	0	-1	0	0	0	-1	0	-1	0	0	0	0	0	0	-1	-1	1	0	0	-1	0	-1	0	1	0	-1	0	-1	-1	0	0	0	-1	0
AGPAT4-IT1	0	-1	0	0	0	-1	0	-1	0	0	0	0	0	0	-1	-1	1	0	0	-1	0	-1	0	1	0	-1	0	-1	-1	0	0	0	-1	0
AGPAT5	-1	0	0	0	0	-1	0	0	0	0	-1	-1	0	0	-1	0	-1	0	0	0	0	0	0	-1	-1	-1	0	0	0	-1	0	0	-1	-1
AGPS	1	0	0	0	0	0	0	0	0	0	0	0	0	0	0	1	0	0	0	0	0	0	0	0	0	0	0	0	0	0	1	0	0	0
AGR2	0	1	1	0	0	0	-1	1	0	0	1	1	0	0	-1	1	1	0	1	0	1	0	0	1	0	1	1	1	1	0	1	1	1	-1
AGR3	0	1	1	0	0	0	-1	1	0	0	1	1	0	0	-1	1	1	0	1	0	1	0	0	1	0	1	1	1	1	0	1	1	1	-1
AGRN	-1	0	0	-1	0	0	0	0	0	0	0	0	0	0	0	0	0	0	0	-1	0	-1	0	-1	0	-1	0	0	0	0	-1	0	0	0
AGRP	0	0	0	0	0	0	1	0	0	0	0	0	0	0	0	0	-1	0	0	0	0	0	0	-1	0	0	0	0	1	0	-1	0	0	0
AGT	0	0	0	1	0	1	0	1	0	0	1	0	0	0	0	0	0	0	0	-1	0	-1	0	-1	0	1	0	0	0	0	0	0	0	0
AGTPBP1	-1	0	0	0	0	0	0	0	0	0	0	0	0	0	0	0	1	0	0	0	0	0	1	1	0	0	0	0	0	0	1	0	0	0
AGTR1	1	0	0	0	0	1	1	1	0	0	0	0	0	0	1	1	0	0	0	0	0	1	0	1	0	0	0	0	0	0	1	0	0	1
AGTRAP	-1	0	0	-1	0	0	0	0	0	0	0	0	0	0	0	0	0	0	0	-1	0	-1	0	-1	0	-1	0	0	0	0	-1	0	0	0
AGXT	-1	0	0	0	0	0	0	0	0	0	0	0	0	0	0	0	0	0	0	0	0	0	0	0	0	0	-1	0	0	0	1	0	0	0
AGXT2	0	0	0	0	0	1	0	1	0	0	0	0	0	0	1	1	1	0	1	-1	0	0	0	1	0	0	0	0	1	0	0	0	0	1
AHCTF1	0	0	0	1	0	1	0	1	0	0	1	0	0	0	0	0	0	0	0	-1	0	0	0	-1	0	1	0	0	0	0	0	0	0	0
AHCTF1P1	1	0	0	0	0	0	0	0	0	0	0	0	0	0	0	1	0	0	0	0	0	0	0	0	0	0	0	0	0	0	1	0	0	0
AHCY	1	0	0	0	0	1	0	1	0	1	1	0	0	0	1	1	0	1	0	1	0	1	1	1	1	1	0	1	1	1	1	0	1	1
AHCYL1	-1	0	0	0	0	-1	1	0	0	0	0	0	0	0	0	0	0	0	0	0	0	-1	0	-1	0	0	0	0	0	-1	-1	0	0	0
AHCYL2	0	1	0	0	0	0	1	1	0	0	1	1	0	0	0	0	0	0	1	0	1	0	1	1	0	0	1	0	1	0	1	1	0	0
AHDC1	-1	0	0	0	0	0	0	0	0	0	-1	0	0	0	0	0	0	0	0	-1	0	-1	0	-1	0	-1	0	0	0	0	-1	0	0	0
AHI1	0	-1	0	0	0	1	0	-1	0	0	1	0	0	0	-1	0	1	0	0	-1	0	0	0	1	0	-1	0	-1	0	0	0	0	-1	0
AHNAK	0	0	0	0	0	0	0	1	0	1	0	0	0	0	1	1	0	0	0	1	0	0	0	0	0	0	0	0	1	0	1	0	0	1
AHNAK2	0	0	0	0	0	-1	0	0	0	0	0	0	0	0	-1	-1	-1	0	0	0	0	-1	0	0	0	-1	1	1	0	1	-1	0	-1	-1
AHR	0	1	0	0	0	0	-1	1	0	0	1	1	0	0	-1	1	1	0	1	0	1	0	0	1	0	1	1	1	1	0	1	0	1	-1
AHRR	0	0	0	0	0	1	0	1	0	0	0	0	0	0	1	1	1	-1	1	-1	0	0	0	1	0	0	0	1	1	0	0	0	0	0
AHSA1	0	0	0	0	0	0	0	0	0	0	0	0	0	0	-1	0	-1	0	0	0	0	-1	0	0	0	-1	1	1	0	0	-1	0	-1	-1
AHSA2	1	0	0	0	0	0	0	0	1	1	0	0	0	0	0	0	0	0	0	0	0	0	0	0	0	0	0	1	0	0	1	0	0	0
AHSG	1	0	0	0	0	1	1	1	0	0	0	0	0	0	0	1	0	0	0	-1	0	1	0	1	1	0	0	0	1	0	1	0	0	0
AHSP	-1	0	0	0	0	0	1	0	0	0	0	0	0	0	0	-1	0	0	0	0	0	0	0	0	0	0	0	0	0	0	-1	0	0	0
AICDA	1	0	0	1	0	0	1	1	0	1	-1	0	0	0	0	1	0	0	0	1	0	0	0	0	1	-1	0	1	1	0	0	0	0	0
AIDA	-1	0	0	1	0	1	0	1	0	0	1	0	0	0	0	0	0	0	0	-1	0	-1	0	-1	0	1	0	0	0	0	0	0	0	0
AIF1	0	-1	1	0	0	0	0	1	0	0	0	0	0	0	0	0	-1	-1	0	-1	0	0	0	-1	0	-1	0	-1	0	0	0	0	0	0
AIF1L	0	0	0	0	0	1	1	0	0	0	0	0	0	0	0	0	1	0	0	0	0	0	1	1	0	0	0	0	0	0	1	0	0	0
AIFM2	1	0	0	0	0	0	0	1	0	0	0	0	0	0	0	0	0	0	0	0	0	0	0	0	0	-1	1	0	1	0	-1	0	0	0
AIFM3	-1	1	0	0	0	0	0	0	0	-1	-1	0	0	0	1	1	0	0	0	-1	0	0	0	-1	-1	-1	0	0	0	1	-1	1	1	1
AIG1	0	-1	0	0	0	-1	0	-1	0	0	1	0	0	0	-1	0	1	0	0	-1	0	0	0	1	0	-1	0	-1	0	0	0	0	-1	0
AIM1	0	-1	0	0	0	-1	0	-1	0	-1	0	0	0	0	-1	0	0	0	0	0	0	0	0	-1	0	-1	0	-1	0	-1	0	0	-1	0
AIM1L	-1	0	0	0	0	0	0	0	0	0	-1	0	0	0	0	0	0	0	0	-1	0	-1	0	-1	0	-1	0	0	0	0	-1	0	0	0
AIM2	0	0	0	1	0	1	1	1	0	0	0	0	0	0	0	0	0	0	0	0	0	0	0	-1	0	1	0	0	0	0	0	0	0	0
AIMP1	-1	0	0	0	0	0	0	0	0	-1	-1	0	0	0	0	0	0	0	0	0	0	-1	0	-1	-1	-1	0	-1	-1	0	-1	0	0	1
AIMP2	0	1	1	0	0	0	-1	1	0	0	1	1	0	0	0	1	1	0	1	0	1	0	0	1	0	1	1	1	1	0	1	0	1	0
AIP	1	0	0	0	0	0	0	1	1	1	0	0	0	0	1	1	0	0	0	1	0	0	0	0	0	0	0	0	1	0	1	-1	1	1
AIPL1	-1	-1	0	0	0	0	0	0	0	-1	-1	0	0	0	-1	0	-1	0	0	-1	0	-1	0	-1	-1	-1	0	0	1	-1	0	0	-1	-1
AIRE	0	0	0	0	0	-1	0	0	0	0	0	0	0	0	-1	0	-1	0	1	-1	0	-1	0	0	0	0	0	1	0	0	-1	0	0	-1
AIRN	0	-1	0	0	0	-1	0	-1	0	0	0	0	0	0	-1	-1	1	0	0	-1	0	-1	0	1	0	-1	0	-1	0	0	0	0	-1	0
AJAP1	-1	0	0	-1	0	0	1	0	0	0	0	0	0	0	0	0	0	0	0	-1	0	-1	0	-1	0	-1	0	0	0	0	-1	0	0	0
AJUBA	0	0	-1	0	0	0	0	0	0	0	0	0	0	0	-1	0	-1	0	0	0	0	-1	0	0	0	-1	0	0	0	0	-1	0	-1	-1
AK1	0	0	0	0	0	1	0	0	0	0	0	0	0	0	0	0	1	0	0	0	0	0	1	1	0	0	0	0	0	0	1	0	0	0
AK2	-1	0	0	0	0	0	0	0	0	0	-1	0	0	0	0	0	0	0	0	-1	0	-1	0	-1	0	-1	0	0	0	0	-1	0	0	0
AK3	-1	0	0	0	0	0	0	0	0	0	0	0	0	0	0	0	1	0	0	0	0	0	0	-1	0	-1	0	0	0	0	-1	0	-1	0
AK4	-1	0	0	0	0	0	0	0	0	0	-1	0	0	0	0	0	0	0	0	-1	0	-1	0	-1	0	-1	0	0	0	-1	-1	0	0	0
AK5	-1	0	0	0	0	-1	0	0	0	0	0	0	0	0	0	0	0	0	0	-1	0	-1	0	-1	0	-1	0	0	0	-1	-1	0	0	0
AK7	0	0	0	0	0	0	0	0	0	0	0	0	0	0	-1	-1	-1	0	0	0	0	-1	0	0	0	-1	1	1	0	1	-1	0	-1	-1
AK8	0	0	0	0	0	1	1	0	0	0	0	0	0	0	0	0	1	0	0	0	0	0	1	1	0	0	0	0	0	0	1	0	0	0
AK9	0	-1	0	0	0	-1	0	-1	0	-1	0	0	0	0	-1	0	0	0	0	-1	0	0	0	-1	0	-1	0	-1	0	-1	0	0	-1	0
AKAIN1	1	-1	0	0	0	-1	0	0	0	-1	-1	0	0	0	1	-1	-1	-1	0	-1	0	0	0	-1	-1	-1	0	0	0	-1	-1	0	0	1
AKAP1	0	-1	0	0	0	1	0	1	0	1	-1	0	1	0	0	0	1	0	0	0	0	1	0	0	0	-1	0	0	0	0	0	0	0	0
AKAP10	1	-1	0	0	0	0	0	0	0	1	0	0	0	0	-1	0	0	0	0	-1	0	-1	0	0	-1	-1	0	0	0	-1	0	0	-1	-1
AKAP11	0	0	0	1	0	1	0	1	0	0	0	1	0	0	1	0	1	0	0	1	0	1	0	0	1	1	0	0	-1	-1	1	0	0	1
AKAP12	0	-1	0	0	0	-1	0	-1	0	0	1	0	0	0	-1	-1	1	0	0	-1	0	-1	0	1	0	-1	0	-1	0	0	0	0	-1	0
AKAP13	0	1	1	0	0	1	1	1	0	0	0	0	0	0	1	0	0	0	0	1	1	0	0	1	-1	1	0	1	1	0	0	0	0	1
AKAP2	0	0	0	0	0	1	1	0	0	0	0	0	0	0	0	0	1	0	0	0	0	0	1	0	0	0	0	0	0	0	1	0	0	0
AKAP3	1	0	0	1	0	0	1	1	0	1	-1	0	0	0	0	1	0	0	0	1	0	0	0	0	1	-1	0	1	1	0	0	0	0	0
AKAP5	0	0	0	0	0	0	0	0	0	0	0	0	0	0	-1	0	-1	0	0	0	0	-1	0	0	0	-1	1	0	0	0	-1	0	-1	-1
AKAP6	0	0	-1	0	0	0	0	0	0	0	0	0	0	0	-1	0	-1	0	0	0	0	1	0	0	0	-1	1	0	0	0	-1	0	-1	-1
AKAP7	0	-1	0	0	0	-1	0	-1	0	0	1	0	0	0	-1	0	1	0	0	-1	0	0	0	1	0	-1	0	-1	0	0	0	0	-1	0
AKAP8	-1	0	0	0	0	0	0	0	0	0	0	0	0	0	-1	0	0	0	0	0	0	0	0	-1	0	-1	0	1	0	-1	0	0	-1	-1
AKAP8L	-1	0	0	0	0	0	0	0	0	0	0	0	0	0	-1	0	0	0	0	0	0	0	0	-1	0	-1	0	1	0	-1	0	0	-1	-1
AKAP9	0	1	0	0	0	0	1	1	0	0	1	1	0	0	0	0	0	0	1	0	1	0	1	0	0	0	1	1	1	0	1	1	0	0
AKIP1	0	0	0	0	0	0	0	0	1	1	0	0	0	0	1	0	0	0	0	1	0	0	0	0	0	0	0	0	1	-1	1	0	0	1
AKIRIN1	-1	0	0	0	0	0	0	0	0	0	0	0	0	0	0	0	0	0	0	-1	0	-1	0	-1	0	-1	0	0	0	0	-1	0	0	0
AKIRIN2	0	-1	0	0	0	-1	0	-1	0	-1	0	0	0	0	-1	-1	0	0	0	0	0	0	0	-1	0	-1	0	-1	0	-1	0	0	-1	0
AKNA	0	0	0	0	0	1	0	0	0	0	0	0	0	0	0	0	1	0	0	0	0	0	1	-1	0	0	0	0	0	0	1	0	0	0
AKNAD1	-1	0	0	0	0	-1	1	0	0	0	0	0	0	0	0	0	0	0	0	0	0	-1	0	-1	0	0	0	0	0	-1	-1	0	0	0
AKR1A1	-1	0	0	0	0	0	0	0	0	0	0	0	0	0	0	0	0	0	0	-1	0	-1	0	-1	0	-1	0	0	0	0	-1	0	0	0
AKR1B1	0	1	0	0	0	0	1	1	0	0	1	1	0	0	0	1	0	0	1	0	1	0	1	1	0	0	1	0	1	0	1	1	0	0
AKR1B10	0	1	0	0	0	0	1	1	0	0	1	1	0	0	0	1	0	0	1	0	1	0	1	1	0	0	1	0	1	0	1	1	0	0
AKR1B15	0	1	0	0	0	0	1	1	0	0	1	1	0	0	0	1	0	0	1	0	1	0	1	1	0	0	1	0	1	0	1	1	0	0
AKR1C1	0	0	1	0	0	0	1	1	0	0	-1	0	0	0	0	0	0	0	0	0	0	0	1	-1	0	-1	0	0	0	0	-1	0	0	0
AKR1C2	0	0	1	0	0	0	1	1	0	0	-1	0	0	0	0	0	0	0	0	0	0	0	1	-1	0	-1	0	0	0	0	-1	0	0	0
AKR1C3	0	0	1	0	0	0	1	1	0	0	-1	0	0	0	0	0	0	0	0	0	0	0	1	-1	0	-1	0	0	0	0	-1	0	0	0
AKR1C4	0	0	1	0	0	0	1	1	0	0	-1	0	0	0	0	0	0	0	0	0	0	0	1	-1	0	-1	0	0	0	0	-1	0	0	0
AKR1C6P	0	0	1	0	0	0	1	1	0	0	-1	0	0	0	0	0	0	0	0	0	0	0	1	-1	0	-1	0	0	0	0	-1	0	0	0
AKR1C8P	0	0	1	0	0	0	1	1	0	0	-1	0	0	0	0	0	0	0	0	0	0	0	1	-1	0	-1	0	0	0	0	-1	0	0	0
AKR1D1	0	1	0	0	0	0	1	1	0	0	1	1	0	0	0	1	0	0	1	0	1	0	1	1	0	0	1	0	1	0	1	1	0	0
AKR1E2	0	0	1	0	0	0	1	1	0	0	-1	0	0	0	0	0	0	0	0	0	0	0	1	-1	0	-1	0	0	0	0	-1	0	0	0
AKR7A2	-1	0	0	-1	0	0	0	0	0	0	-1	0	0	0	0	0	0	0	0	-1	0	-1	0	-1	0	-1	0	0	0	0	-1	0	0	0
AKR7A2P1	-1	0	0	0	0	-1	1	0	0	0	0	0	0	0	0	0	0	0	0	0	0	-1	0	-1	0	0	0	0	0	0	-1	0	0	0
AKR7A3	-1	0	0	-1	0	0	0	0	0	0	-1	0	0	0	0	0	0	0	0	-1	0	-1	0	-1	0	-1	0	0	0	0	-1	0	0	0
AKR7L	-1	0	0	-1	0	0	0	0	0	0	-1	0	0	0	0	0	0	0	0	-1	0	-1	0	-1	0	-1	0	0	0	0	-1	0	0	0
AKT1	0	0	0	0	0	-1	0	0	0	0	0	0	0	0	-1	-1	-1	0	0	0	0	-1	0	0	0	-1	1	1	0	1	-1	0	-1	-1
AKT1S1	-1	0	0	0	0	0	0	0	0	0	0	0	0	0	1	1	0	0	0	0	0	0	0	-1	-1	-1	0	1	0	0	-1	0	0	1
AKT2	0	0	0	0	0	0	0	0	0	0	0	0	0	0	1	0	0	0	0	0	0	0	0	-1	0	-1	0	1	0	0	1	0	1	1
AKT3	0	0	0	1	0	1	0	1	0	0	1	0	0	0	0	0	0	0	0	-1	0	-1	0	-1	0	1	0	0	0	0	0	0	0	0
AKTIP	0	0	0	0	0	0	1	0	0	0	0	0	0	0	0	0	-1	0	0	0	0	0	0	-1	0	0	0	0	1	0	-1	0	0	0
ALAD	0	0	0	0	0	1	0	0	0	0	0	0	0	0	0	0	1	0	0	0	0	0	1	-1	0	0	0	0	0	0	1	0	0	0
ALAS1	-1	0	0	0	0	-1	0	0	0	0	0	0	0	0	-1	0	0	0	0	0	0	0	0	-1	0	0	0	0	0	-1	0	0	0	-1
ALB	-1	0	0	0	0	0	0	0	0	-1	0	0	0	0	0	0	0	0	0	0	0	-1	0	-1	-1	-1	0	-1	0	0	-1	0	0	1
ALCAM	0	0	0	0	0	1	0	1	0	0	0	0	0	0	1	1	0	0	0	0	0	1	0	1	0	0	0	0	0	0	1	0	0	1
ALDH16A1	-1	0	0	0	0	0	0	0	0	0	0	0	0	0	1	1	0	0	0	0	0	0	0	-1	-1	-1	0	1	0	0	-1	0	0	1
ALDH18A1	0	0	0	0	0	0	0	1	0	0	0	0	0	0	0	0	0	0	0	0	0	0	0	0	0	-1	0	0	0	0	-1	0	0	0
ALDH1A1	-1	0	0	0	0	0	1	0	0	0	0	0	0	0	0	0	1	0	0	0	0	0	0	-1	0	0	0	0	0	0	1	0	0	0
ALDH1A2	0	0	1	0	0	1	1	1	0	0	0	0	0	0	1	1	0	0	0	1	1	0	0	-1	-1	0	0	-1	0	0	-1	0	0	1
ALDH1A3	0	1	1	0	0	1	-1	1	0	0	0	0	0	0	1	0	0	0	0	1	1	0	0	0	-1	1	0	0	0	0	0	0	0	1
ALDH1B1	-1	0	0	0	0	0	0	0	0	0	0	0	0	0	-1	0	1	0	0	0	0	0	0	0	0	-1	0	0	0	0	-1	0	-1	-1
ALDH1L1	0	0	0	0	0	1	1	1	0	0	0	0	0	0	1	1	0	0	0	0	0	1	0	1	0	0	0	0	0	0	1	0	0	1
ALDH1L1-AS1	0	0	0	0	0	1	1	1	0	0	0	0	0	0	1	1	0	0	0	0	0	1	0	1	0	0	0	0	0	0	1	0	0	1
ALDH1L1-AS2	0	0	0	0	0	1	1	1	0	0	0	0	0	0	1	1	0	0	0	0	0	1	0	1	0	0	0	0	0	0	1	0	0	1
ALDH1L2	0	0	0	1	0	0	0	-1	0	0	0	0	0	0	0	0	0	1	0	0	0	0	0	0	0	-1	0	0	0	0	0	1	0	0
ALDH2	0	0	0	1	0	0	0	1	0	0	0	0	0	0	0	0	0	1	0	0	0	0	0	0	0	-1	0	0	0	0	0	1	0	0
ALDH3A1	1	-1	0	0	0	0	0	0	0	1	0	0	0	0	-1	0	1	0	0	-1	0	-1	0	0	-1	-1	0	0	0	-1	0	0	-1	-1
ALDH3A2	1	-1	0	0	0	0	0	0	0	1	0	0	0	0	-1	0	1	0	0	-1	0	-1	0	0	-1	-1	0	0	0	-1	0	0	-1	-1
ALDH3B1	1	0	0	0	0	0	0	1	1	1	0	0	0	0	1	1	0	0	0	1	0	0	0	0	0	0	0	0	1	0	1	0	1	1
ALDH3B2	1	0	0	0	0	0	0	1	1	1	0	0	0	0	1	1	0	0	0	1	0	0	0	0	0	0	0	0	1	0	1	-1	1	1
ALDH4A1	-1	0	0	-1	0	0	0	0	0	0	-1	0	0	0	0	0	0	0	0	-1	0	-1	0	-1	0	-1	0	0	0	0	-1	0	0	0
ALDH5A1	0	-1	-1	0	0	0	0	1	0	0	0	0	0	0	0	0	-1	-1	0	-1	0	0	0	-1	0	-1	0	-1	0	0	0	0	0	0
ALDH6A1	0	0	0	0	0	0	0	0	0	0	0	0	0	0	-1	0	-1	0	0	0	0	-1	0	0	0	-1	1	1	0	0	-1	0	-1	-1
ALDH7A1	1	0	0	0	0	1	0	0	0	0	0	0	0	0	0	1	1	0	0	1	0	-1	0	1	0	0	0	1	0	1	-1	1	0	0
ALDH8A1	0	-1	0	0	0	1	0	-1	0	0	1	0	0	0	-1	0	1	0	0	-1	0	0	0	1	0	-1	0	-1	0	0	0	0	-1	0
ALDH9A1	0	0	0	1	0	1	1	1	0	0	0	0	0	0	0	0	0	0	0	0	0	0	0	-1	0	1	0	0	0	0	0	0	1	0
ALDOA	-1	0	0	0	0	0	1	0	0	0	0	0	0	0	0	-1	0	0	0	0	0	0	0	0	0	0	0	0	0	0	-1	0	0	0
ALDOB	0	0	0	0	0	1	1	0	0	0	0	0	0	0	0	0	1	0	0	0	0	0	1	-1	0	0	0	0	0	0	1	0	0	0
ALDOC	0	0	0	0	0	1	0	1	0	1	0	0	0	0	0	0	1	0	0	-1	0	1	0	0	0	-1	0	0	0	0	0	0	0	0
ALG1	-1	0	0	0	0	0	0	0	0	0	0	0	0	0	0	-1	0	0	0	0	0	0	0	0	0	0	0	0	0	0	-1	0	-1	0
ALG10	1	0	0	1	0	0	1	1	0	1	0	0	0	0	1	1	0	0	0	1	0	0	0	0	1	0	0	1	1	0	0	1	0	1
ALG10B	1	0	0	1	0	0	1	0	0	1	0	0	0	0	0	-1	0	0	0	0	0	0	0	0	0	0	0	0	0	0	0	1	0	0
ALG11	0	0	0	1	0	1	0	0	0	-1	0	1	0	0	1	0	1	0	0	1	0	1	0	0	1	1	0	0	0	-1	1	0	0	1
ALG12	-1	-1	0	0	0	0	1	-1	0	-1	-1	0	0	0	-1	0	-1	0	0	-1	0	0	0	-1	-1	-1	0	0	0	-1	-1	0	-1	-1
ALG14	-1	0	0	0	0	-1	1	0	0	0	0	0	0	0	0	0	0	0	0	-1	0	-1	0	-1	0	-1	0	0	0	-1	-1	0	0	0
ALG1L	0	0	0	0	0	1	1	1	0	0	0	0	0	0	1	1	0	0	0	0	0	1	0	1	0	0	0	0	0	0	1	0	0	1
ALG1L2	0	0	0	-1	-1	1	-1	1	0	0	0	0	0	0	1	0	0	0	0	-1	0	1	0	1	0	0	0	0	0	0	-1	0	0	1
ALG1L9P	1	0	0	0	0	0	0	1	1	1	0	0	0	0	1	1	0	0	0	1	0	0	0	0	0	0	0	0	1	0	1	0	1	1
ALG2	0	0	0	0	0	1	1	0	0	0	0	0	0	0	0	0	1	0	0	0	0	0	1	-1	0	0	0	0	0	0	1	0	0	0
ALG3	1	0	0	0	0	1	1	1	0	0	0	0	0	0	0	1	0	0	0	0	0	1	0	1	1	0	0	0	0	0	1	0	0	0
ALG5	0	0	0	1	0	1	1	1	0	0	0	1	0	0	1	0	1	0	0	1	0	1	0	0	1	1	0	0	-1	-1	1	0	0	1
ALG6	-1	0	0	0	0	0	0	0	0	0	-1	0	0	0	0	0	0	0	0	-1	0	-1	0	-1	0	-1	0	0	0	-1	-1	0	0	0
ALG8	1	0	0	0	0	0	0	1	1	1	0	0	0	0	1	1	0	0	0	1	0	0	0	0	0	0	0	0	1	1	1	0	1	1
ALG9	1	0	0	0	0	0	0	1	1	1	0	0	0	0	1	1	0	0	0	1	0	0	0	0	0	0	0	0	1	1	1	0	0	1
ALK	0	0	0	0	0	0	1	0	0	1	0	0	0	0	0	0	0	0	0	0	0	0	0	0	0	0	0	1	0	0	1	0	0	0
ALKBH1	0	0	0	0	0	0	0	0	0	0	0	0	0	0	-1	0	-1	0	0	0	0	-1	0	0	0	-1	1	1	0	0	-1	0	-1	-1
ALKBH2	0	0	0	1	0	0	0	1	0	0	0	0	0	0	0	0	0	1	0	0	0	0	0	0	0	-1	0	0	0	0	0	1	0	0
ALKBH3	0	0	0	0	0	0	0	0	0	1	0	0	0	0	1	0	0	0	0	1	0	0	0	0	0	0	0	0	1	0	1	0	0	1
ALKBH3-AS1	0	0	0	0	0	0	0	0	0	1	0	0	0	0	1	0	0	0	0	1	0	0	0	0	0	0	0	0	1	0	1	0	0	1
ALKBH4	0	1	0	0	0	0	1	1	0	0	1	1	0	0	0	0	0	0	1	0	1	0	1	0	0	0	1	1	1	0	1	1	0	0
ALKBH5	1	-1	0	0	0	0	0	0	0	-1	0	0	0	0	-1	0	-1	0	0	-1	0	-1	0	-1	-1	-1	0	0	0	-1	0	0	-1	-1
ALKBH6	0	0	0	0	0	0	0	0	0	0	0	0	0	0	1	-1	0	0	0	0	0	0	0	-1	0	-1	0	1	0	0	1	0	1	1
ALKBH7	-1	0	0	0	0	0	0	0	0	0	0	0	0	0	-1	0	0	0	0	0	0	0	0	-1	0	-1	0	0	0	-1	0	0	-1	-1
ALKBH8	1	0	0	0	0	0	0	1	1	1	0	0	0	0	1	1	0	0	0	1	0	0	0	0	0	0	0	0	1	1	1	0	0	1
ALLC	0	0	0	0	0	0	1	0	1	1	0	0	0	0	0	-1	0	0	0	0	0	0	0	0	0	0	0	1	0	0	1	0	0	0
ALMS1	1	0	0	0	0	0	0	0	0	1	0	0	0	0	0	0	0	0	0	0	0	0	0	0	0	0	0	1	0	0	1	0	0	0
ALMS1P1	1	0	0	0	0	0	0	0	0	1	0	0	0	0	0	0	0	0	0	0	0	0	0	0	0	0	0	1	0	0	1	0	0	0
ALOX12	-1	-1	0	0	0	0	0	-1	0	-1	-1	0	0	0	-1	0	-1	0	0	-1	0	-1	0	-1	-1	-1	0	0	1	-1	0	0	-1	-1
ALOX12-AS1	-1	-1	0	0	0	0	0	-1	0	-1	-1	0	0	0	-1	0	-1	0	0	-1	0	-1	0	-1	-1	-1	0	0	1	-1	0	0	-1	-1
ALOX12B	-1	-1	0	0	0	0	0	0	0	-1	-1	0	0	0	-1	0	-1	0	0	-1	0	-1	0	-1	-1	-1	0	0	1	-1	0	0	-1	-1
ALOX12P2	-1	-1	0	0	0	0	0	-1	0	-1	-1	0	0	0	-1	0	-1	0	0	-1	0	-1	0	-1	-1	-1	0	0	1	-1	0	0	-1	-1
ALOX15	-1	-1	0	0	0	0	0	0	0	-1	-1	0	0	0	-1	0	-1	0	0	-1	0	-1	0	-1	-1	-1	0	0	1	-1	0	0	-1	-1
ALOX15B	-1	-1	0	0	0	0	0	0	0	-1	-1	0	0	0	-1	0	-1	0	0	-1	0	-1	0	-1	-1	-1	0	0	1	-1	0	0	-1	-1
ALOX15P1	-1	-1	0	0	0	0	0	-1	0	-1	-1	0	0	0	-1	0	-1	0	0	-1	0	-1	0	-1	-1	-1	0	0	1	-1	0	0	-1	-1
ALOX5	0	0	0	0	0	0	0	1	0	0	-1	0	0	0	0	0	0	0	0	0	0	0	0	0	0	-1	0	0	1	0	-1	0	0	0
ALOX5AP	0	0	0	1	0	1	1	1	0	0	0	1	0	0	1	0	1	0	0	1	0	1	0	1	1	1	0	0	-1	-1	1	0	0	1
ALOXE3	-1	-1	0	0	0	0	0	0	0	-1	-1	0	0	0	-1	0	-1	0	0	-1	0	-1	0	-1	-1	-1	0	0	1	-1	0	0	-1	-1
ALPI	-1	0	0	0	0	0	0	0	0	0	0	0	0	0	0	0	0	0	0	0	0	0	0	0	0	0	0	0	0	0	1	0	0	0
ALPK1	-1	0	0	0	0	0	0	0	0	-1	-1	0	0	0	0	0	0	0	0	0	0	-1	0	-1	-1	-1	0	-1	-1	0	-1	0	0	1
ALPK2	-1	-1	-1	0	-1	-1	0	-1	0	-1	-1	0	0	0	-1	-1	-1	-1	0	-1	0	0	0	-1	-1	-1	0	-1	-1	-1	-1	0	-1	-1
ALPK3	0	1	1	0	0	1	1	1	0	0	0	0	0	0	1	0	0	0	0	1	1	0	0	1	-1	1	0	0	0	0	0	0	0	1
ALPL	-1	0	0	-1	0	0	0	0	0	0	-1	0	0	0	0	0	0	0	0	-1	0	-1	0	-1	0	-1	0	0	0	0	-1	0	0	0
ALPP	-1	0	0	0	0	0	0	0	0	0	0	0	0	0	0	0	0	0	0	0	0	0	0	0	0	0	0	0	0	0	1	0	0	0
ALPPL2	-1	0	0	0	0	0	0	0	0	0	0	0	0	0	0	0	0	0	0	0	0	0	0	0	0	0	0	0	0	0	1	0	0	0
ALS2	1	0	0	0	0	0	0	0	0	0	0	0	0	0	0	1	0	0	0	0	0	0	0	0	0	0	0	0	0	0	1	0	0	0
ALS2CL	-1	0	0	0	0	-1	0	0	0	0	0	0	0	0	-1	0	0	0	0	0	0	0	0	-1	0	0	0	0	0	-1	0	0	0	-1
ALS2CR11	1	0	0	0	0	0	0	0	0	0	0	0	0	0	0	1	0	0	0	0	0	0	0	0	0	0	0	0	0	0	1	0	0	0
ALS2CR12	1	0	0	0	0	0	0	0	0	0	0	0	0	0	0	1	0	0	0	0	0	0	0	0	0	0	0	0	0	0	1	0	0	0
ALX1	0	0	0	1	0	0	0	-1	0	0	0	0	0	0	0	0	0	1	0	0	0	0	0	0	0	-1	0	0	0	0	0	1	0	0
ALX3	-1	0	0	0	0	-1	1	0	0	0	0	0	0	0	0	0	0	0	0	0	0	-1	0	-1	0	0	0	0	0	-1	-1	0	0	0
ALX4	0	0	0	0	0	0	0	0	0	1	0	0	0	0	1	0	0	0	0	1	0	0	0	0	0	0	0	0	1	0	1	0	0	1
ALYREF	0	1	0	0	0	1	0	1	0	1	-1	0	1	0	0	0	1	0	0	0	0	1	0	0	0	-1	0	0	1	1	0	0	0	0
AMACR	0	0	0	0	0	1	0	1	0	0	0	0	0	0	1	1	1	0	1	-1	0	0	0	1	0	0	0	0	1	0	0	0	0	1
AMBN	-1	0	0	0	0	0	0	0	0	-1	0	0	0	0	0	0	0	0	0	0	0	-1	0	-1	-1	-1	0	-1	0	0	-1	0	0	1
AMBP	0	0	0	0	0	1	0	0	0	0	0	0	0	0	0	0	1	0	0	0	0	0	1	-1	0	0	0	0	0	0	1	0	0	0
AMBRA1	0	0	0	0	0	0	0	0	0	1	0	0	0	0	1	0	0	0	0	1	0	0	0	0	0	0	0	0	1	0	1	0	0	1
AMD1	0	-1	0	0	0	-1	0	-1	0	0	0	0	0	0	-1	0	0	0	0	0	0	0	0	-1	0	-1	0	-1	0	-1	0	0	-1	0
AMDHD1	0	0	0	1	0	0	0	-1	0	0	0	0	0	0	0	0	0	1	0	0	0	0	0	0	0	-1	0	0	0	0	0	1	0	0
AMDHD2	-1	0	-1	0	0	0	0	0	0	0	0	0	0	0	0	-1	0	0	0	0	0	0	0	0	0	0	0	0	0	0	-1	0	-1	0
AMER2	0	0	0	1	0	1	1	0	0	0	0	1	0	0	1	0	1	0	0	1	0	1	0	1	1	1	0	0	-1	-1	1	0	0	0
AMER3	1	0	0	0	0	0	0	0	0	0	0	0	0	0	0	1	0	0	0	0	0	0	0	0	0	0	0	0	0	0	1	0	0	0
AMFR	0	0	0	0	0	0	1	0	0	0	0	0	0	0	0	0	-1	0	0	0	0	0	0	-1	0	0	0	0	1	0	-1	0	0	0
AMH	-1	0	0	0	0	-1	0	0	0	0	0	0	0	0	-1	0	0	0	0	0	0	0	0	-1	0	-1	0	-1	0	-1	0	0	-1	-1
AMHR2	0	0	0	1	0	0	0	1	0	0	0	0	0	0	0	0	0	0	0	0	0	0	0	0	0	0	0	0	1	0	0	1	0	0
AMIGO1	-1	0	0	0	0	-1	1	0	0	0	0	0	0	0	0	0	0	0	0	0	0	-1	0	-1	0	0	0	0	0	-1	-1	0	0	0
AMIGO2	1	0	0	1	0	0	1	1	0	1	0	0	0	0	0	0	0	0	0	0	0	0	0	0	0	0	0	0	1	0	0	1	0	0
AMIGO3	-1	0	0	0	0	-1	0	0	0	0	0	0	0	0	-1	0	0	0	0	0	0	0	0	-1	0	0	0	0	0	-1	0	0	0	-1
AMMECR1L	1	0	0	0	0	0	1	0	0	0	0	0	0	0	0	1	0	0	0	0	0	0	0	0	0	0	0	0	0	0	1	0	0	0
AMN	0	0	0	0	0	-1	0	0	0	0	0	0	0	0	-1	-1	-1	0	0	0	0	-1	0	0	0	-1	1	1	0	1	-1	0	-1	-1
AMN1	1	0	0	1	0	0	1	1	0	1	0	0	0	0	1	1	0	0	-1	1	0	0	0	0	1	0	0	1	1	0	0	1	0	1
AMOTL1	1	0	0	0	0	0	0	1	1	1	0	0	0	0	1	1	0	0	0	1	0	0	0	0	0	0	0	0	1	1	1	0	1	1
AMOTL2	0	0	0	0	0	1	1	1	0	0	0	0	0	0	0	1	0	0	0	0	0	1	0	1	0	0	0	0	0	0	1	0	0	0
AMPD1	-1	0	0	0	0	-1	1	0	0	0	0	0	0	0	0	0	0	0	0	0	0	-1	0	-1	0	0	0	0	0	-1	-1	0	0	0
AMPD2	-1	0	0	0	0	-1	1	0	0	0	0	0	0	0	0	0	0	0	0	0	0	-1	0	-1	0	0	0	0	0	-1	-1	0	0	0
AMPD3	0	0	0	0	0	0	0	0	0	1	0	0	1	0	1	0	0	0	0	1	0	0	0	0	0	0	0	0	1	-1	1	0	0	1
AMPH	0	1	0	0	0	0	0	1	0	0	1	1	0	0	0	1	1	0	1	0	1	0	0	1	0	1	1	1	1	0	1	0	1	0
AMT	-1	0	0	0	0	-1	0	0	0	0	0	0	0	0	-1	0	0	0	0	0	0	0	0	-1	0	0	0	0	0	-1	0	0	0	-1
AMTN	-1	0	0	0	0	0	0	0	0	-1	0	0	0	0	0	0	0	0	0	0	0	-1	0	-1	-1	-1	0	-1	0	0	-1	0	0	1
AMY1A	-1	0	0	0	0	-1	1	0	0	0	0	0	0	0	0	0	0	0	0	0	0	-1	0	-1	0	-1	0	0	0	-1	-1	0	0	0
AMY2A	-1	0	0	0	0	-1	1	0	0	0	0	0	0	0	0	0	0	0	0	0	0	-1	0	-1	0	-1	0	0	0	-1	-1	0	0	0
AMY2B	-1	0	0	0	0	-1	1	0	0	0	0	0	0	0	0	0	0	0	0	0	0	-1	0	-1	0	-1	0	0	0	-1	-1	0	0	0
AMZ1	0	1	1	0	0	0	-1	1	0	0	1	1	0	0	0	1	1	0	1	0	1	0	0	1	0	1	1	1	1	0	1	0	1	0
AMZ2	0	0	0	0	0	1	0	1	0	1	-1	0	1	0	1	0	1	0	0	0	0	1	0	0	0	-1	0	0	1	0	0	0	0	1
AMZ2P1	0	0	0	0	0	1	0	1	0	1	-1	0	1	0	0	0	1	0	0	0	0	1	0	0	0	-1	0	0	1	0	0	0	0	0
ANAPC1	1	0	0	0	0	0	1	0	0	0	0	0	0	0	0	1	0	0	0	0	0	0	0	0	0	0	0	1	0	0	1	0	0	0
ANAPC10	-1	0	0	0	0	0	0	0	0	-1	-1	0	0	0	0	0	0	0	0	-1	0	-1	0	-1	-1	-1	0	-1	0	0	-1	0	1	1
ANAPC11	0	1	0	0	0	1	0	1	0	1	-1	0	1	0	0	0	1	0	0	0	0	1	0	0	0	-1	0	0	1	1	0	0	0	0
ANAPC13	0	0	0	0	0	1	1	1	0	0	0	0	0	0	0	1	0	0	0	0	0	1	0	1	0	0	0	0	0	0	1	0	0	0
ANAPC15	1	0	0	0	0	0	0	1	1	1	0	0	0	0	1	1	0	0	0	1	0	0	0	0	0	0	0	0	1	0	1	0	1	1
ANAPC16	1	0	0	0	0	0	0	1	0	0	0	0	0	0	0	0	0	0	0	0	0	0	0	0	0	-1	1	0	1	0	-1	0	0	0
ANAPC1P1	1	0	0	0	0	0	1	0	0	1	0	0	0	0	0	1	0	0	0	0	0	0	0	0	0	0	0	1	0	0	1	0	0	0
ANAPC2	0	0	0	0	0	1	1	0	0	0	0	0	0	0	0	0	1	0	0	0	0	0	1	1	0	0	0	0	0	0	1	0	0	0
ANAPC4	-1	0	0	0	0	0	0	0	0	-1	0	0	0	0	0	-1	0	0	0	0	0	-1	0	0	0	-1	0	-1	0	0	-1	0	-1	1
ANAPC5	0	0	0	1	0	1	0	1	0	0	1	0	0	0	0	0	0	1	0	1	0	0	0	0	0	-1	0	0	0	0	0	1	0	0
ANAPC7	0	0	0	1	0	0	0	1	0	0	0	0	0	0	0	0	0	1	0	0	0	0	0	0	0	-1	0	0	0	0	0	1	0	0
ANG	0	0	-1	0	0	0	0	0	0	0	0	0	0	0	-1	0	-1	0	0	0	0	-1	0	0	0	-1	0	0	0	0	-1	0	-1	-1
ANGEL1	0	0	0	0	0	0	0	0	0	0	0	0	0	0	-1	0	-1	0	0	0	0	-1	0	0	0	-1	1	1	0	0	-1	0	-1	-1
ANGEL2	0	0	0	1	0	1	0	1	0	0	1	0	0	0	0	0	0	0	0	-1	0	-1	0	-1	0	1	0	0	0	0	0	0	0	0
ANGPT1	-1	0	0	0	1	1	0	0	0	0	1	0	1	0	1	0	0	1	0	-1	0	0	1	0	1	1	0	0	0	0	0	0	1	0
ANGPT2	-1	0	0	0	0	-1	0	0	0	0	-1	0	0	0	-1	0	-1	0	0	0	0	0	0	-1	-1	-1	0	0	0	-1	0	0	-1	-1
ANGPT4	1	0	0	0	0	1	0	0	0	1	-1	0	0	0	0	1	0	0	0	1	0	1	1	-1	1	1	0	1	1	-1	0	0	1	1
ANGPTL1	0	0	0	0	0	1	0	1	0	0	0	0	0	0	0	-1	0	0	0	0	0	0	0	-1	0	1	0	0	0	0	0	0	0	0
ANGPTL2	0	0	0	0	0	1	0	0	0	0	0	0	0	0	0	0	1	0	0	0	0	0	1	1	0	0	0	0	0	0	1	0	0	0
ANGPTL3	-1	0	0	0	0	0	0	0	0	0	-1	0	0	0	0	0	0	0	0	-1	0	-1	0	-1	0	-1	0	0	0	-1	-1	0	0	0
ANGPTL4	-1	0	0	0	0	0	0	0	0	0	0	0	0	0	-1	0	0	0	0	0	0	0	0	-1	0	-1	0	1	0	-1	0	0	-1	-1
ANGPTL5	1	0	0	0	0	0	0	1	1	1	0	0	0	0	1	1	0	0	0	1	0	0	0	0	0	0	0	0	1	1	1	0	1	1
ANGPTL6	-1	0	0	0	0	0	0	0	0	0	0	0	0	0	-1	0	0	0	0	0	0	0	0	-1	0	-1	0	1	0	-1	0	0	-1	-1
ANGPTL7	-1	0	0	-1	0	0	0	0	0	0	0	0	0	0	0	0	0	0	0	-1	0	-1	0	-1	0	-1	0	0	0	0	-1	0	0	0
ANGPTL8	-1	0	0	0	0	0	0	0	0	0	0	0	0	0	-1	0	0	0	0	0	0	0	0	-1	0	-1	0	1	0	-1	0	0	-1	-1
ANK1	-1	0	0	0	0	-1	0	0	0	0	1	0	0	0	-1	0	0	0	0	0	0	0	1	1	-1	1	0	0	0	0	0	0	0	-1
ANK2	-1	0	0	0	0	0	0	0	0	-1	-1	0	0	0	0	0	0	0	0	0	0	-1	0	-1	-1	-1	0	-1	-1	0	-1	0	0	1
ANK3	1	0	0	0	0	0	0	1	0	0	0	0	0	0	0	0	0	0	0	0	0	0	0	0	0	-1	0	0	1	0	-1	0	0	0
ANKAR	1	0	0	0	0	0	0	0	0	0	0	0	0	0	0	1	0	0	0	0	0	0	0	0	0	0	0	0	0	0	1	0	0	0
ANKDD1A	0	0	1	0	0	1	1	1	0	0	0	0	0	0	1	1	0	0	0	1	1	0	0	-1	-1	0	0	0	0	0	-1	0	0	1
ANKDD1B	0	0	0	0	0	1	0	1	0	0	0	0	0	0	0	0	1	0	0	-1	0	0	0	1	0	0	0	0	1	1	-1	1	0	0
ANKEF1	1	0	0	0	0	1	0	0	0	1	-1	0	0	0	0	1	0	0	0	1	0	1	1	-1	1	1	0	1	1	-1	0	0	1	1
ANKFN1	0	-1	0	0	0	1	0	1	0	1	-1	0	1	0	0	0	1	0	0	0	0	1	0	0	0	-1	0	0	0	0	0	0	0	0
ANKFY1	-1	-1	0	0	0	0	0	0	0	-1	-1	0	0	0	-1	0	-1	0	0	-1	0	-1	0	-1	-1	-1	0	0	1	-1	0	0	-1	-1
ANKH	0	0	0	0	0	1	0	1	0	0	0	0	0	0	1	1	1	-1	1	-1	0	0	0	1	0	0	0	1	1	0	0	0	0	1
ANKHD1	1	0	0	0	0	1	0	0	0	0	0	0	0	0	0	1	1	0	0	1	0	0	0	1	0	0	0	1	0	1	-1	1	0	0
ANKHD1-EIF4EBP3	1	0	0	0	0	1	0	0	0	0	0	0	0	0	0	1	1	0	0	1	0	0	0	1	0	0	0	1	0	1	-1	1	0	0
ANKIB1	0	1	0	0	0	0	1	1	0	0	1	1	0	0	0	0	0	0	1	0	1	0	1	0	0	0	1	1	1	0	1	1	0	0
ANKK1	1	0	0	0	0	0	0	-1	1	1	0	0	0	0	1	1	0	0	0	1	0	0	0	0	0	0	0	0	0	1	1	0	0	1
ANKLE1	-1	0	0	0	0	0	0	0	0	0	0	0	0	0	-1	0	0	0	0	0	0	0	0	-1	0	-1	0	1	0	-1	0	0	-1	-1
ANKLE2	0	0	0	1	0	1	0	1	0	0	1	0	0	0	0	0	0	1	0	1	0	0	0	0	0	-1	0	0	0	0	0	1	0	0
ANKMY1	-1	0	0	0	0	0	0	0	0	0	0	0	0	0	0	0	0	0	0	0	0	0	0	0	0	0	-1	0	0	0	1	0	0	0
ANKMY2	0	1	1	0	0	0	-1	1	0	0	1	1	0	0	-1	1	1	0	1	0	1	0	0	1	0	1	1	1	1	0	1	1	1	-1
ANKRA2	0	0	0	0	0	1	0	1	0	0	0	0	0	0	0	0	1	0	0	0	0	0	0	1	0	0	0	0	1	0	-1	1	0	0
ANKRD1	0	0	0	0	0	0	0	1	0	0	0	0	0	0	0	0	0	0	0	0	0	0	0	0	0	-1	0	0	0	0	-1	0	0	0
ANKRD10	0	0	0	1	0	1	1	1	1	0	0	1	0	0	1	0	1	0	0	1	0	1	0	0	1	1	0	0	1	-1	1	0	0	1
ANKRD11	0	0	0	0	-1	0	0	0	0	0	0	0	1	0	0	-1	-1	0	0	0	0	0	0	-1	0	0	0	-1	0	0	-1	0	0	0
ANKRD12	1	-1	0	0	1	-1	0	0	0	-1	-1	0	0	0	1	-1	-1	-1	0	-1	0	0	0	-1	-1	-1	0	0	0	-1	-1	0	0	1
ANKRD13A	0	0	0	1	0	0	0	1	0	0	0	0	0	0	0	0	0	1	0	0	0	0	0	0	0	-1	0	0	0	0	0	1	0	0
ANKRD13B	0	0	0	0	0	1	0	1	0	1	0	0	0	0	0	0	1	0	0	0	0	1	0	0	0	-1	0	0	0	0	0	0	0	0
ANKRD13C	-1	0	0	0	0	-1	0	0	0	0	0	0	0	0	0	0	0	0	0	-1	0	-1	0	-1	0	-1	0	0	0	-1	-1	0	0	0
ANKRD13D	1	0	0	0	0	0	0	1	1	1	0	0	0	0	1	1	0	0	0	1	0	0	0	0	0	0	0	0	1	0	1	0	1	1
ANKRD16	0	0	1	0	0	0	1	1	0	0	-1	0	0	0	0	0	0	0	0	0	0	0	1	-1	0	-1	0	0	0	0	-1	0	0	0
ANKRD17	-1	0	0	0	0	0	0	0	0	-1	0	0	0	0	0	0	0	0	0	0	0	-1	0	-1	-1	-1	0	-1	0	0	-1	0	0	1
ANKRD18A	-1	0	0	0	0	0	0	0	0	0	0	0	0	0	-1	0	1	0	0	0	0	0	0	0	0	-1	0	0	0	0	-1	0	-1	-1
ANKRD18B	-1	0	0	0	0	0	0	0	0	0	0	0	0	0	0	0	1	0	0	0	0	0	0	0	0	-1	0	0	0	0	-1	0	-1	0
ANKRD18DP	1	0	0	0	0	1	1	1	1	0	1	0	0	0	0	1	0	0	0	-1	0	1	0	1	1	0	0	0	1	0	1	0	0	0
ANKRD19P	-1	0	0	0	0	0	0	0	0	0	0	0	0	0	0	0	1	0	0	0	0	0	1	1	0	0	0	0	0	0	1	0	0	0
ANKRD2	0	0	0	0	0	0	0	1	0	0	0	0	0	0	0	0	0	0	0	0	0	0	0	0	0	-1	0	0	0	0	-1	0	0	0
ANKRD20A11P	0	0	0	0	0	-1	0	0	0	0	0	0	0	0	-1	-1	-1	-1	0	-1	0	1	0	0	0	0	0	1	0	0	-1	0	0	-1
ANKRD20A19P	0	0	0	1	0	1	1	1	0	0	0	1	0	0	1	0	1	0	0	1	0	1	0	1	1	1	0	0	-1	-1	1	0	0	0
ANKRD20A5P	1	-1	0	0	1	-1	0	0	0	-1	-1	0	0	0	1	-1	-1	-1	0	-1	0	0	0	-1	-1	-1	0	0	0	-1	-1	0	0	1
ANKRD20A8P	1	0	0	0	0	0	1	0	0	1	0	0	0	0	0	1	0	0	0	0	0	0	0	0	0	0	0	1	0	0	1	0	0	0
ANKRD20A9P	0	0	0	1	0	1	1	1	0	0	0	1	0	0	1	0	1	0	0	1	0	1	0	1	1	1	0	0	-1	-1	1	0	0	0
ANKRD22	0	0	0	0	0	0	0	1	0	0	0	0	0	0	0	0	0	0	0	0	0	0	0	0	0	-1	0	0	1	0	-1	0	0	0
ANKRD23	1	0	0	0	0	0	1	0	0	1	0	0	0	0	0	1	0	0	0	0	0	0	0	0	0	0	0	1	0	0	1	0	0	0
ANKRD24	-1	0	0	0	0	-1	0	0	0	0	0	0	0	0	-1	0	0	0	0	0	0	0	0	-1	0	-1	0	0	0	-1	0	0	-1	-1
ANKRD26	0	0	0	0	0	-1	0	1	0	0	-1	0	0	0	0	0	0	0	0	0	0	0	1	-1	0	-1	0	0	0	0	-1	0	0	0
ANKRD26P1	-1	0	0	0	0	0	1	0	0	0	0	0	0	0	0	0	0	0	0	0	0	0	0	-1	0	0	0	0	1	0	-1	0	0	0
ANKRD26P3	0	0	0	1	0	1	1	1	0	0	0	1	0	0	1	0	1	0	0	1	0	1	0	1	1	1	0	0	-1	-1	1	0	0	0
ANKRD27	0	0	0	0	0	0	0	0	0	0	0	0	0	0	1	-1	0	0	0	0	0	0	0	-1	0	-1	0	1	0	0	1	0	1	1
ANKRD28	-1	0	0	0	0	-1	0	0	0	0	0	0	0	0	-1	-1	0	0	0	0	0	0	0	-1	0	0	0	0	0	-1	0	0	0	-1
ANKRD29	-1	-1	0	0	0	-1	0	0	0	-1	-1	0	0	0	-1	-1	-1	1	0	-1	0	0	0	-1	1	-1	0	1	0	-1	-1	0	1	-1
ANKRD30A	0	0	0	0	0	-1	0	1	0	0	0	0	0	0	0	0	0	0	0	0	0	0	1	-1	0	-1	0	0	0	0	-1	0	0	0
ANKRD30B	1	-1	0	0	1	-1	0	0	0	-1	-1	0	0	0	1	-1	-1	-1	0	-1	0	0	0	-1	-1	-1	0	0	0	-1	-1	0	0	1
ANKRD30BL	1	0	0	0	0	0	0	0	0	0	0	0	0	0	0	1	0	0	0	0	0	0	0	0	0	0	0	0	0	0	1	0	0	0
ANKRD30BP2	0	0	0	0	1	0	0	0	0	0	0	0	0	0	1	-1	-1	0	0	-1	0	1	0	0	0	0	0	1	0	0	0	0	0	-1
ANKRD30BP3	0	0	0	0	0	0	0	1	0	0	-1	0	0	0	0	0	0	0	0	0	0	0	0	0	0	-1	0	0	1	0	-1	0	0	0
ANKRD31	0	0	0	0	0	1	0	1	0	0	0	0	0	0	0	0	1	0	0	-1	0	0	0	1	0	0	0	0	1	1	-1	1	0	0
ANKRD33	1	0	0	1	0	0	0	1	0	0	0	0	0	0	0	0	0	0	0	0	0	0	0	0	0	0	0	0	1	0	0	1	0	0
ANKRD33B	0	0	0	0	0	1	0	1	0	0	0	0	0	0	1	1	1	-1	1	-1	0	0	0	1	0	0	0	1	1	0	0	0	0	1
ANKRD34A	0	0	0	0	0	1	1	1	0	0	0	0	0	0	0	0	0	0	0	0	0	0	0	-1	0	0	0	0	0	0	0	0	0	0
ANKRD34B	0	0	0	0	0	1	0	1	0	0	0	0	0	0	0	0	1	0	0	-1	0	0	0	1	0	0	0	0	1	1	-1	1	0	0
ANKRD34C	0	0	1	0	0	1	1	1	0	0	0	0	0	0	1	0	0	0	0	1	1	0	0	0	-1	1	0	0	0	0	0	0	0	1
ANKRD34C-AS1	0	0	1	0	0	1	1	1	0	0	0	0	0	0	1	0	0	0	0	1	1	0	0	0	-1	1	0	0	0	0	0	0	0	1
ANKRD35	0	0	0	0	0	1	1	1	0	0	0	0	0	0	0	0	0	0	0	0	0	0	0	-1	0	0	0	0	0	0	0	0	0	0
ANKRD36	1	0	0	0	0	0	1	0	0	1	0	0	0	0	0	1	0	0	0	0	0	0	0	0	0	0	0	1	0	0	1	0	0	0
ANKRD36B	1	0	0	0	0	0	1	0	0	1	0	0	0	0	0	1	0	0	0	0	0	0	0	0	0	0	0	1	0	0	1	0	0	0
ANKRD36BP1	0	0	0	1	0	1	0	1	0	0	0	0	0	0	0	0	0	0	0	0	0	0	0	-1	0	1	0	0	0	0	0	0	0	0
ANKRD36BP2	1	0	0	0	0	0	1	0	0	1	0	0	0	0	0	1	0	0	0	-1	0	0	0	0	0	0	0	1	0	0	1	0	0	0
ANKRD37	-1	0	0	0	0	0	1	0	-1	-1	-1	0	0	0	-1	-1	0	0	0	0	0	-1	0	-1	-1	-1	0	-1	0	0	-1	0	1	-1
ANKRD39	1	0	0	0	0	0	1	0	0	1	0	0	0	0	0	1	0	0	0	0	0	0	0	0	0	0	0	1	0	0	1	0	0	0
ANKRD40	1	0	0	0	0	1	0	1	0	1	0	0	1	0	0	0	1	0	0	0	0	1	0	0	0	-1	0	0	0	0	0	0	0	0
ANKRD42	1	0	0	0	0	0	0	1	1	1	0	0	0	0	1	1	0	0	0	1	0	0	0	0	0	0	0	0	1	1	1	0	1	1
ANKRD44	1	0	0	0	0	0	0	0	0	0	0	0	0	0	0	1	0	0	0	0	0	0	0	0	0	0	0	0	0	0	1	0	0	0
ANKRD45	0	0	0	0	0	1	0	1	0	0	0	0	0	0	0	0	0	0	0	0	0	0	0	-1	0	1	0	0	0	0	0	0	0	0
ANKRD46	-1	0	0	0	1	1	0	0	0	0	1	0	1	0	1	0	0	1	0	-1	0	0	1	0	1	1	0	0	0	0	0	0	1	0
ANKRD49	1	0	0	0	0	0	0	1	1	1	0	0	0	0	1	1	0	0	0	1	0	0	0	0	0	0	0	0	1	1	1	0	1	1
ANKRD50	-1	0	0	0	0	0	0	-1	0	-1	-1	0	0	0	0	0	0	0	0	-1	0	-1	0	-1	-1	-1	0	-1	-1	0	-1	0	0	1
ANKRD52	0	0	0	1	0	0	0	1	0	0	0	0	0	0	0	0	0	0	0	0	0	0	0	0	0	0	0	0	1	0	0	1	0	0
ANKRD53	1	0	0	0	0	0	0	0	1	1	0	0	0	0	0	0	0	0	0	0	0	0	0	0	0	0	0	1	0	0	1	0	0	0
ANKRD54	-1	-1	0	0	0	0	0	-1	0	-1	-1	0	0	0	-1	0	-1	0	0	-1	0	0	0	-1	-1	-1	0	0	0	-1	-1	0	-1	-1
ANKRD55	0	0	0	0	0	1	0	0	0	0	0	0	0	0	0	0	1	0	0	-1	0	0	0	1	0	0	0	0	1	0	-1	0	0	0
ANKRD6	0	-1	0	0	0	-1	0	-1	0	-1	0	0	0	0	-1	-1	0	0	0	0	0	0	0	-1	0	-1	0	-1	0	-1	0	0	-1	0
ANKRD61	0	1	1	0	0	0	-1	1	0	0	1	1	0	0	0	1	1	0	1	0	1	0	0	1	0	1	1	1	1	0	1	0	1	0
ANKRD62	1	-1	0	0	1	-1	0	0	0	-1	-1	0	0	0	1	-1	-1	-1	0	-1	0	0	0	-1	-1	-1	0	0	0	-1	-1	0	0	1
ANKRD62P1-PARP4P3	-1	1	0	0	0	0	0	1	0	-1	-1	0	0	0	-1	1	0	0	1	-1	0	0	0	-1	-1	-1	0	0	0	1	-1	0	0	-1
ANKRD63	0	0	0	0	0	1	0	1	0	0	0	0	0	0	1	1	0	0	0	1	1	0	0	-1	-1	0	0	-1	0	0	-1	0	0	1
ANKRD65	-1	0	0	-1	0	0	0	0	0	0	0	0	0	0	0	0	0	0	0	-1	0	-1	0	-1	0	-1	0	0	0	0	-1	0	0	0
ANKRD66	0	-1	0	0	0	-1	0	1	0	0	0	0	0	0	0	0	-1	0	0	-1	0	0	0	-1	0	-1	0	-1	0	0	0	0	0	0
ANKRD7	0	1	0	0	0	0	1	-1	0	0	1	1	0	0	0	0	0	0	1	0	1	0	1	0	0	0	1	0	1	0	1	1	0	0
ANKRD9	0	0	0	0	0	-1	0	0	0	0	0	0	0	0	-1	-1	-1	0	0	0	0	-1	0	0	0	-1	1	1	0	1	-1	0	-1	-1
ANKS1A	0	-1	0	0	0	-1	0	1	0	0	0	0	0	0	0	0	-1	-1	0	-1	0	0	0	-1	0	-1	0	-1	0	-1	0	0	0	0
ANKS1B	0	0	0	1	0	0	0	-1	0	0	0	0	0	0	0	0	0	1	0	0	0	0	0	0	0	0	0	0	0	0	0	1	0	0
ANKS3	-1	0	-1	0	0	0	0	-1	0	0	0	0	0	0	0	-1	0	0	0	0	0	0	0	0	0	0	0	0	0	0	-1	0	-1	0
ANKS4B	-1	0	0	0	0	0	1	0	0	0	0	0	0	0	0	-1	-1	0	0	0	0	0	0	0	0	0	0	0	0	0	-1	0	-1	0
ANKS6	0	0	0	0	0	1	1	0	0	0	0	0	0	0	0	0	1	0	0	0	0	0	1	-1	0	0	0	0	0	0	1	0	0	0
ANKUB1	1	0	0	0	0	1	1	1	0	0	0	0	0	0	1	1	0	0	0	0	0	1	0	1	0	0	0	0	0	0	1	0	0	1
ANKZF1	1	0	0	0	0	0	0	0	0	0	0	0	0	0	0	0	0	0	0	0	0	0	0	0	0	0	0	0	0	0	1	0	0	0
ANLN	0	1	0	0	0	0	0	1	0	0	1	1	0	0	0	1	1	0	1	0	1	0	0	1	0	1	1	1	1	0	1	1	1	0
ANO1	1	0	0	0	0	0	0	1	1	1	0	0	0	0	1	1	0	0	0	1	0	0	0	0	0	0	0	0	1	0	1	0	1	1
ANO10	-1	0	0	0	0	-1	0	0	0	0	0	0	0	0	-1	0	0	0	0	0	0	0	0	-1	0	0	0	0	0	-1	0	0	0	-1
ANO2	1	0	0	1	0	0	1	1	0	1	-1	0	0	0	0	1	0	0	0	1	0	0	0	0	1	-1	0	1	1	0	0	0	0	0
ANO3	0	0	0	0	0	0	0	0	0	1	0	0	0	0	1	-1	0	0	0	1	0	0	0	0	0	0	0	0	1	0	1	0	0	1
ANO4	0	0	0	1	0	0	0	-1	0	0	0	0	0	0	0	0	0	1	0	0	0	0	0	0	0	0	0	0	0	0	0	1	0	0
ANO5	0	0	0	0	0	0	0	0	0	1	0	0	0	0	1	-1	0	0	0	1	0	0	0	0	0	0	0	0	1	0	1	0	0	1
ANO6	1	0	0	1	0	0	1	1	0	1	0	0	0	0	0	0	0	0	0	0	0	0	0	0	0	0	0	0	1	0	0	1	0	0
ANO7	-1	0	0	0	0	0	0	0	0	0	0	0	0	0	0	0	0	0	0	0	0	0	0	0	0	0	-1	0	0	0	1	0	0	0
ANO8	-1	0	0	0	0	0	0	0	0	0	0	0	0	0	-1	0	0	0	0	0	0	0	0	-1	0	-1	0	1	0	-1	0	0	-1	-1
ANO9	0	0	0	0	0	0	0	0	1	0	0	0	0	0	1	0	0	0	0	1	0	0	0	0	0	0	0	-1	1	-1	1	0	0	1
ANP32A	0	0	1	0	0	1	1	1	0	0	0	0	0	0	1	1	0	0	0	1	1	0	0	-1	-1	1	0	0	0	0	-1	0	0	1
ANP32A-IT1	0	0	1	0	0	1	1	1	0	0	0	0	0	0	1	1	0	0	0	1	1	0	0	-1	-1	1	0	0	0	0	-1	0	0	1
ANP32AP1	0	0	0	0	0	1	0	1	0	0	0	0	0	0	1	1	0	0	0	1	1	0	0	-1	-1	0	0	-1	0	0	-1	0	0	1
ANP32B	0	0	0	0	0	1	1	0	0	0	0	0	0	0	0	0	1	0	0	0	0	0	1	-1	0	0	0	0	0	0	1	0	0	0
ANP32C	-1	0	0	0	0	0	0	0	0	-1	-1	0	0	0	-1	-1	0	0	0	0	0	-1	0	-1	-1	-1	0	-1	0	0	-1	0	1	-1
ANP32D	1	0	0	1	0	0	0	1	0	1	0	0	0	0	0	0	0	0	0	0	0	0	0	0	0	0	0	0	1	0	0	1	0	0
ANPEP	0	1	1	0	0	1	1	1	0	0	0	0	0	0	1	0	0	0	0	1	1	0	0	0	-1	1	0	0	0	0	0	0	0	1
ANTXR1	1	0	0	0	0	0	0	0	1	1	0	0	0	0	0	0	0	0	0	0	0	0	0	0	0	0	0	1	0	0	1	0	0	0
ANTXR2	-1	0	0	0	0	0	0	-1	0	-1	0	0	0	0	0	0	0	0	0	0	0	-1	0	-1	-1	-1	0	-1	0	0	-1	0	0	1
ANXA1	-1	0	0	0	0	0	1	0	0	0	0	0	0	0	0	0	1	0	0	0	0	0	0	-1	0	0	0	0	0	0	1	0	0	0
ANXA10	-1	0	0	0	0	0	0	0	-1	-1	-1	0	0	0	-1	-1	0	0	0	0	0	-1	0	-1	-1	-1	0	-1	0	0	-1	0	1	-1
ANXA11	0	0	0	0	0	0	0	1	0	0	-1	0	0	0	0	0	0	0	0	0	0	0	0	0	0	-1	1	0	1	0	-1	0	0	0
ANXA13	-1	0	0	0	1	1	0	0	0	1	1	0	1	0	1	0	1	1	0	-1	0	0	1	0	1	1	0	0	0	0	0	0	1	1
ANXA2	0	0	1	0	0	1	1	1	0	0	0	0	0	0	1	1	0	0	0	1	1	0	0	-1	-1	0	0	-1	0	0	-1	0	0	1
ANXA2P1	-1	0	0	0	0	0	0	0	0	-1	-1	0	0	0	0	-1	0	0	0	-1	0	-1	0	-1	-1	-1	0	-1	0	-1	-1	0	1	1
ANXA2P2	-1	0	0	0	0	0	0	0	0	0	0	0	0	0	0	0	1	0	0	0	0	0	0	0	0	-1	0	0	0	0	-1	0	-1	0
ANXA2P3	1	0	0	0	0	0	0	1	0	0	0	0	0	0	0	0	0	0	0	0	0	0	0	0	0	-1	1	0	1	0	-1	0	0	0
ANXA2R	0	0	0	0	0	1	0	1	0	0	0	0	0	0	1	1	1	0	1	0	0	0	0	1	0	0	0	0	1	0	0	0	0	1
ANXA3	-1	0	0	0	0	0	0	-1	0	-1	0	0	0	0	0	0	0	0	0	0	0	-1	0	-1	-1	-1	0	-1	0	0	-1	0	0	1
ANXA4	1	0	0	0	0	0	0	0	1	1	0	0	0	0	0	0	0	0	0	0	0	0	0	0	0	0	0	1	0	0	1	0	0	0
ANXA5	-1	0	0	0	0	0	0	0	0	-1	-1	0	0	0	0	0	0	0	0	-1	0	-1	0	-1	-1	-1	0	-1	-1	0	-1	0	0	1
ANXA6	1	0	0	0	0	0	0	0	0	0	0	0	0	0	0	1	1	0	0	1	0	0	0	1	0	0	0	1	0	1	-1	1	0	0
ANXA7	1	0	0	0	0	0	0	1	0	0	0	0	0	0	0	0	0	0	0	0	0	0	0	0	0	-1	1	0	1	0	-1	0	1	0
ANXA8	0	0	0	0	0	0	0	1	0	0	-1	0	0	0	0	1	0	0	0	0	0	0	1	0	0	0	0	0	1	0	-1	0	0	0
AOAH	0	1	0	0	0	0	0	1	0	0	1	1	0	0	0	1	1	0	1	0	1	0	0	1	0	1	1	1	1	0	1	1	1	0
AOAH-IT1	0	1	0	0	0	0	0	1	0	0	1	1	0	0	0	1	1	0	1	0	1	0	0	1	0	1	1	1	1	0	1	1	1	0
AOC1	0	1	0	0	0	0	1	1	0	0	1	1	0	0	1	1	0	0	1	0	1	0	1	1	0	0	1	0	1	0	1	1	0	1
AOC2	0	0	0	0	0	1	0	1	0	1	0	0	0	0	0	0	1	0	0	0	0	1	0	0	0	-1	0	0	0	0	0	0	0	0
AOC3	0	0	0	0	0	1	0	1	0	1	0	0	0	0	0	0	1	0	0	0	0	1	0	0	0	-1	0	0	0	0	0	0	0	0
AOC4P	0	0	0	0	0	1	0	1	0	1	0	0	0	0	0	0	1	0	0	0	0	1	0	0	0	-1	0	0	0	0	0	0	0	0
AOX1	1	0	0	0	0	0	0	0	0	0	0	0	0	0	0	1	0	0	0	0	0	0	0	0	0	0	0	0	0	0	1	0	0	0
AOX2P	1	0	0	0	0	0	0	0	0	0	0	0	0	0	0	1	0	0	0	0	0	0	0	0	0	0	0	0	0	0	1	0	0	0
AP1AR	-1	0	0	0	0	0	0	0	0	-1	-1	0	0	0	0	0	0	0	0	0	0	-1	0	-1	-1	-1	0	-1	-1	0	-1	0	0	1
AP1B1	-1	-1	0	0	0	0	0	-1	0	-1	-1	0	0	0	1	0	0	0	0	-1	0	0	0	-1	-1	-1	0	0	0	-1	-1	0	-1	1
AP1B1P1	-1	-1	0	0	0	0	0	-1	0	-1	-1	0	0	0	-1	0	0	0	0	-1	0	0	0	-1	-1	-1	0	0	0	-1	-1	0	-1	-1
AP1G1	0	0	0	0	0	0	1	0	0	0	-1	0	0	0	0	0	-1	0	0	0	0	0	0	-1	0	0	0	0	1	0	-1	0	0	0
AP1G2	0	0	-1	0	0	0	0	0	0	0	0	0	0	0	-1	0	-1	0	0	0	0	-1	0	0	0	-1	0	0	0	0	-1	0	-1	-1
AP1M1	-1	0	0	0	0	0	0	0	0	0	0	0	0	0	-1	0	0	0	0	0	0	0	0	-1	0	-1	0	1	0	-1	0	0	-1	-1
AP1M2	-1	0	0	0	0	0	0	0	0	0	0	0	0	0	-1	0	0	0	0	0	0	0	0	-1	0	-1	0	1	0	-1	0	0	-1	-1
AP1S1	0	1	0	0	0	0	1	1	0	0	1	1	0	0	0	0	0	0	1	0	1	0	1	0	0	0	1	1	1	0	1	1	0	0
AP1S3	1	0	0	0	0	0	0	0	0	0	0	0	0	0	0	0	0	0	0	0	0	0	0	0	0	0	0	0	0	0	1	0	0	0
AP2A1	-1	0	0	0	0	0	0	0	0	0	0	0	0	0	1	1	0	0	0	0	0	0	0	-1	-1	-1	0	1	0	0	-1	0	0	1
AP2A2	0	0	0	0	0	0	0	0	1	0	0	0	0	0	1	0	0	0	0	1	0	0	0	0	0	0	0	-1	1	-1	1	0	0	1
AP2B1	0	0	0	0	0	1	0	1	0	1	0	0	0	0	1	0	1	0	0	0	0	1	0	0	0	-1	0	0	0	0	0	0	0	1
AP2M1	1	0	0	0	0	1	1	1	0	0	0	0	0	0	0	1	0	0	0	0	0	1	0	1	1	0	0	0	0	0	1	0	0	0
AP2S1	-1	0	0	0	0	0	0	0	0	0	0	0	0	0	1	0	0	0	0	0	0	0	0	-1	0	-1	0	1	0	0	-1	0	1	1
AP3B1	0	0	0	0	0	1	0	1	0	0	0	0	0	0	0	0	1	0	0	-1	0	0	0	1	0	0	0	0	1	1	-1	1	0	0
AP3B2	0	0	1	0	0	1	1	1	0	0	0	0	0	0	1	0	0	0	0	1	1	0	0	1	-1	1	0	0	0	0	0	0	0	1
AP3D1	-1	0	0	0	0	-1	0	0	0	0	0	0	0	0	-1	0	0	0	0	0	0	0	0	-1	0	-1	0	-1	0	-1	0	0	-1	-1
AP3M1	0	0	0	0	0	0	0	1	0	0	0	0	0	0	0	0	0	0	0	0	0	0	0	0	0	-1	1	0	1	0	-1	0	1	0
AP3M2	-1	0	0	0	0	-1	0	0	0	0	1	0	0	0	-1	0	0	0	0	0	0	0	1	1	-1	1	0	0	0	0	0	0	0	-1
AP3S1	0	0	0	0	0	1	0	0	0	0	0	0	1	0	0	-1	1	0	0	1	0	-1	0	1	0	0	0	1	0	1	-1	1	0	0
AP3S2	0	1	1	0	0	1	-1	1	0	0	0	0	0	0	1	0	0	0	0	1	1	0	0	0	-1	1	0	0	0	0	0	0	0	1
AP4B1	-1	0	0	0	0	-1	1	0	0	0	0	0	0	0	0	0	0	0	0	0	0	-1	0	-1	0	0	0	0	0	-1	-1	0	0	0
AP4B1-AS1	-1	0	0	0	0	-1	1	0	0	0	0	0	0	0	0	0	0	0	0	0	0	-1	0	-1	0	0	0	0	0	-1	-1	0	0	0
AP4E1	0	0	0	0	0	1	1	1	0	0	0	0	0	0	1	1	0	0	0	1	1	0	0	1	-1	0	0	-1	0	0	-1	0	0	1
AP4M1	0	1	0	0	0	0	1	1	0	0	1	1	0	0	0	0	0	0	1	0	1	0	1	0	0	0	1	1	1	0	1	1	0	0
AP4S1	0	0	-1	0	0	0	0	0	0	0	0	0	0	0	-1	0	-1	0	0	0	0	1	0	0	0	-1	1	0	0	0	-1	0	-1	-1
AP5B1	0	0	0	0	0	0	0	-1	0	1	0	0	0	0	1	1	0	0	0	1	0	0	0	0	0	0	0	0	1	0	1	0	0	1
AP5M1	0	0	0	0	0	0	0	0	0	0	0	0	0	0	-1	0	-1	0	0	0	0	-1	0	0	0	-1	1	0	0	0	-1	0	-1	-1
AP5S1	1	0	0	0	0	1	0	0	0	1	-1	0	0	0	0	1	0	0	0	1	0	1	1	-1	1	1	0	1	1	-1	0	0	1	1
AP5Z1	0	1	1	0	0	0	-1	1	0	0	1	1	0	0	0	1	1	0	1	0	1	0	0	1	0	1	1	1	1	0	1	0	1	0
APAF1	0	0	0	1	0	0	0	-1	0	0	0	0	0	0	0	0	0	1	0	0	0	0	0	0	0	0	0	0	0	0	0	1	0	0
APBA1	-1	0	0	0	0	0	1	0	0	0	0	0	0	0	0	0	1	0	0	0	0	0	0	-1	0	0	0	0	0	0	1	0	0	0
APBA2	0	0	0	0	0	1	0	1	0	0	0	0	0	0	1	0	0	0	0	1	1	0	0	0	-1	0	0	-1	0	0	-1	0	0	1
APBA3	-1	0	0	0	0	-1	0	0	0	0	0	0	0	0	-1	0	0	0	0	0	0	0	0	-1	0	-1	0	-1	0	-1	0	0	-1	-1
APBB1	0	0	0	0	0	0	0	0	1	0	0	0	0	0	1	0	0	0	0	1	0	0	0	0	0	0	0	0	1	-1	1	0	0	1
APBB1IP	0	0	0	0	0	-1	0	1	0	0	-1	0	0	0	0	0	0	0	0	0	0	0	1	-1	0	-1	0	0	0	0	-1	0	0	0
APBB2	-1	0	0	0	0	0	0	0	0	-1	0	0	0	0	0	-1	0	0	0	0	0	-1	0	0	0	-1	0	-1	0	0	-1	0	-1	1
APBB3	1	0	0	0	0	1	0	0	0	0	0	0	0	0	0	1	1	0	0	1	0	0	0	1	0	0	0	1	0	1	-1	1	0	0
APC	0	0	0	0	0	0	0	0	0	0	0	0	0	0	0	-1	1	0	0	1	0	-1	0	1	-1	0	0	1	0	1	-1	1	0	0
APC2	-1	0	0	0	0	-1	0	0	0	0	0	0	0	0	-1	0	0	0	0	0	0	0	0	-1	0	-1	0	-1	0	-1	0	0	-1	-1
APCDD1	1	-1	0	0	1	-1	0	0	0	-1	-1	0	0	0	1	-1	-1	-1	0	-1	0	0	0	-1	-1	-1	0	0	0	-1	-1	0	0	1
APCDD1L	1	0	0	0	0	1	0	1	0	1	1	0	0	0	1	1	0	1	0	1	0	1	1	1	1	1	0	1	1	1	1	0	1	1
APCDD1L-AS1	1	0	0	0	0	1	0	1	0	1	1	0	0	0	1	1	0	1	0	1	0	1	1	1	1	1	0	1	1	1	1	0	1	1
APCS	0	0	0	1	0	1	1	1	0	0	0	0	0	0	0	0	0	0	0	0	0	0	0	-1	0	1	0	0	0	0	0	0	0	0
APEH	-1	0	0	0	0	-1	0	0	0	0	0	0	0	0	-1	0	0	0	0	0	0	0	0	-1	0	0	0	0	0	-1	0	0	0	-1
APELA	-1	0	0	0	0	0	0	0	0	-1	-1	0	0	0	-1	-1	0	0	0	0	0	-1	0	-1	-1	-1	0	-1	0	0	-1	0	1	-1
APEX1	0	0	-1	0	0	0	0	0	0	0	0	0	0	0	-1	0	-1	0	0	0	0	-1	0	0	0	-1	0	0	0	0	-1	0	-1	-1
APH1B	0	0	1	0	0	1	1	1	0	0	0	0	0	0	1	1	0	0	0	1	1	0	0	-1	-1	0	0	-1	0	0	-1	0	0	1
API5	0	0	0	0	0	0	0	0	0	1	0	0	0	0	1	0	0	0	0	1	0	0	0	0	0	0	0	0	1	0	1	0	0	1
APIP	0	0	0	0	0	0	0	-1	0	1	0	0	0	0	1	0	0	0	0	1	0	0	0	0	0	0	0	0	1	0	1	0	0	1
APITD1-CORT	-1	0	0	-1	0	0	0	0	0	0	0	0	0	0	0	0	0	0	0	-1	0	-1	0	-1	0	-1	0	0	0	0	-1	0	0	0
APLF	1	0	0	0	0	0	0	0	1	1	0	0	0	0	0	0	0	0	0	0	0	0	0	0	0	0	0	1	0	0	1	0	0	0
APLNR	0	0	0	0	0	0	0	-1	0	1	0	0	0	0	1	0	0	0	0	1	0	0	0	0	0	0	0	0	1	0	1	0	0	1
APLP1	0	0	0	0	0	0	0	0	0	0	0	0	0	0	1	-1	0	0	0	0	0	0	0	-1	0	-1	0	1	0	0	1	0	1	1
APLP2	1	0	0	0	0	0	0	1	1	1	0	0	0	0	1	1	0	0	0	1	0	0	0	0	0	0	0	0	0	1	1	0	0	1
APMAP	0	0	0	0	0	1	0	0	0	1	-1	0	0	0	0	1	0	0	0	1	0	1	1	-1	1	1	0	1	1	-1	1	0	1	1
APOA1	1	0	0	0	0	0	0	1	1	1	0	0	0	0	1	1	0	0	0	1	0	0	0	0	0	0	0	0	0	1	1	0	0	1
APOA2	0	0	0	1	0	1	1	1	0	0	0	0	0	0	0	0	0	0	0	0	0	0	0	-1	0	1	0	0	0	0	0	0	0	0
APOA4	1	0	0	0	0	0	0	1	1	1	0	0	0	0	1	1	0	0	0	1	0	0	0	0	0	0	0	0	0	1	1	0	0	1
APOA5	1	0	0	0	0	0	0	1	1	1	0	0	0	0	1	1	0	0	0	1	0	0	0	0	0	0	0	0	0	1	1	0	0	1
APOB	0	0	0	0	0	0	1	0	1	1	0	0	0	0	0	0	0	0	0	0	0	0	0	0	0	0	0	1	0	0	1	0	0	0
APOBEC1	1	0	0	1	0	0	1	1	0	1	-1	0	0	0	0	1	0	0	0	1	0	0	0	0	1	-1	0	1	1	0	0	0	0	0
APOBEC2	0	-1	0	0	0	1	0	1	0	0	0	0	0	0	0	0	-1	0	0	-1	0	0	0	-1	0	-1	0	-1	0	0	0	0	0	0
APOBEC3A	-1	-1	0	0	0	0	0	-1	0	-1	-1	0	0	0	-1	0	-1	0	0	-1	0	0	0	-1	-1	-1	0	0	0	-1	-1	0	-1	-1
APOBEC3A_B	-1	-1	0	0	0	0	0	-1	0	-1	-1	0	0	0	-1	0	-1	0	0	-1	0	0	0	-1	-1	-1	0	0	0	-1	-1	0	-1	-1
APOBEC3B	-1	-1	0	0	0	0	0	-1	0	-1	-1	0	0	0	-1	0	-1	0	0	-1	0	0	0	-1	-1	-1	0	0	0	-1	-1	0	-1	-1
APOBEC3C	-1	-1	0	0	0	0	0	-1	0	-1	-1	0	0	0	-1	0	-1	0	0	-1	0	0	0	-1	-1	-1	0	0	0	-1	-1	0	-1	-1
APOBEC3D	-1	-1	0	0	0	0	0	-1	0	-1	-1	0	0	0	-1	0	-1	0	0	-1	0	0	0	-1	-1	-1	0	0	0	-1	-1	0	-1	-1
APOBEC3F	-1	-1	0	0	0	0	0	-1	0	-1	-1	0	0	0	-1	0	-1	0	0	-1	0	0	0	-1	-1	-1	0	0	0	-1	-1	0	-1	-1
APOBEC3G	-1	-1	0	0	0	0	0	-1	0	-1	-1	0	0	0	-1	0	-1	0	0	-1	0	0	0	-1	-1	-1	0	0	0	-1	-1	0	-1	-1
APOBEC3H	-1	-1	0	0	0	0	0	-1	0	-1	-1	0	0	0	-1	0	-1	0	0	-1	0	0	0	-1	-1	-1	0	0	0	-1	-1	0	-1	-1
APOBEC4	0	0	0	0	0	1	0	1	0	0	0	0	0	0	0	-1	0	0	0	0	0	0	0	-1	0	1	0	0	0	0	0	0	0	0
APOBR	-1	0	0	0	0	0	1	0	0	0	0	0	0	0	0	-1	0	0	0	0	0	0	0	0	0	0	0	0	0	0	-1	0	-1	0
APOC1	-1	0	0	0	0	0	0	0	0	0	0	0	0	0	1	0	0	0	0	0	0	0	0	-1	0	-1	0	1	0	0	1	0	0	1
APOC1P1	-1	0	0	0	0	0	0	0	0	0	0	0	0	0	1	0	0	0	0	0	0	0	0	-1	0	-1	0	1	0	0	1	0	0	1
APOC2	-1	0	0	0	0	0	0	0	0	0	0	0	0	0	1	0	0	0	0	0	0	0	0	-1	0	-1	0	1	0	0	1	0	0	1
APOC3	1	0	0	0	0	0	0	1	1	1	0	0	0	0	1	1	0	0	0	1	0	0	0	0	0	0	0	0	0	1	1	0	0	1
APOC4-APOC2	-1	0	0	0	0	0	0	0	0	0	0	0	0	0	1	0	0	0	0	0	0	0	0	-1	0	-1	0	1	0	0	1	0	0	1
APOD	1	0	0	0	0	1	1	1	0	0	1	0	0	0	0	1	0	0	0	-1	0	1	0	1	1	0	0	0	1	0	1	0	0	0
APOE	-1	0	0	0	0	0	0	0	0	0	0	0	0	0	1	0	0	0	0	0	0	0	0	-1	0	-1	0	1	0	0	1	0	0	1
APOF	0	0	0	1	0	0	0	1	0	0	0	0	0	0	0	0	0	0	0	0	0	0	0	0	0	0	0	0	1	0	0	1	0	0
APOH	0	0	0	0	0	1	0	1	0	1	-1	0	1	0	1	0	1	0	0	0	0	1	0	0	0	-1	0	0	1	0	0	0	0	1
APOL1	-1	-1	0	0	0	0	0	-1	0	-1	-1	0	0	0	-1	0	-1	0	0	-1	0	0	0	-1	-1	-1	0	0	0	-1	-1	0	-1	-1
APOL2	-1	-1	0	0	0	0	0	-1	0	-1	-1	0	0	0	-1	0	-1	0	0	-1	0	0	0	-1	-1	-1	0	0	0	-1	-1	0	-1	-1
APOL3	-1	-1	0	0	0	0	0	-1	0	-1	-1	0	0	0	-1	0	-1	0	0	-1	0	0	0	-1	-1	-1	0	0	0	-1	-1	0	-1	-1
APOL4	-1	-1	0	0	0	0	0	-1	0	-1	-1	0	0	0	-1	0	-1	0	0	-1	0	0	0	-1	-1	-1	0	0	0	-1	-1	0	-1	-1
APOL5	-1	-1	0	0	0	0	0	-1	0	-1	-1	0	0	0	-1	0	-1	0	0	-1	0	0	0	-1	-1	-1	0	0	0	-1	-1	0	-1	-1
APOL6	-1	-1	0	0	0	0	0	-1	0	-1	-1	0	0	0	-1	0	-1	0	0	-1	0	0	0	-1	-1	-1	0	0	0	-1	-1	0	-1	-1
APOLD1	1	0	0	1	0	0	1	1	0	1	-1	0	0	0	0	1	0	0	0	1	0	0	0	0	1	-1	0	1	1	0	0	0	0	0
APOM	0	-1	1	0	0	0	0	1	0	0	0	0	0	0	0	0	-1	-1	0	-1	0	0	0	-1	0	-1	0	-1	0	0	0	0	0	0
APOOP5	0	0	0	0	0	0	1	0	0	0	0	0	0	0	0	0	-1	0	0	0	0	0	0	-1	0	0	0	0	1	0	-1	0	0	0
APOPT1	0	0	0	0	0	-1	0	0	0	0	0	0	0	0	-1	-1	-1	0	0	0	0	-1	0	0	0	-1	1	1	0	1	-1	0	-1	-1
APP	0	0	0	0	0	0	0	0	0	0	-1	0	0	0	-1	-1	-1	-1	0	-1	0	0	0	0	0	0	0	1	0	0	-1	0	0	-1
APPBP2	0	0	0	0	0	1	0	1	0	1	-1	0	1	0	0	0	1	0	0	0	0	1	0	0	0	-1	0	0	1	0	0	0	0	0
APPL1	0	0	0	0	0	-1	0	0	-1	0	0	0	0	0	-1	0	0	0	0	0	0	0	0	-1	0	0	0	0	0	-1	0	0	0	-1
APPL2	0	0	0	1	0	0	0	-1	0	0	0	0	0	0	0	0	0	1	0	0	0	0	0	0	0	-1	0	0	0	0	0	1	0	0
APRT	0	0	0	0	0	0	0	0	0	0	0	0	1	0	0	-1	-1	0	0	0	0	0	0	-1	0	0	0	0	0	0	-1	0	0	0
APTR	0	1	0	0	0	0	1	1	0	0	1	1	0	0	0	0	0	0	1	0	1	0	0	0	0	0	1	1	1	0	1	1	0	0
APTX	-1	0	0	0	0	0	0	0	0	0	0	0	0	0	0	0	1	0	0	0	0	0	0	0	0	-1	0	0	0	0	-1	0	-1	0
AQP1	0	1	0	0	0	0	0	1	0	0	1	1	0	0	0	1	1	0	1	0	1	0	0	1	0	1	1	1	1	0	1	1	-1	0
AQP10	0	0	0	1	0	1	1	1	0	0	0	0	0	0	0	0	0	0	0	0	0	0	0	-1	0	1	0	0	0	0	0	0	0	0
AQP11	1	0	0	0	0	0	0	1	1	1	0	0	0	0	1	1	0	0	0	1	0	0	0	0	0	0	0	0	1	1	1	0	1	1
AQP12A	-1	0	0	0	0	0	0	0	0	0	0	0	0	0	0	0	0	0	0	0	0	0	0	0	0	0	-1	0	0	0	1	0	0	0
AQP12B	-1	0	0	0	0	0	0	0	0	0	0	0	0	0	0	0	0	0	0	0	0	0	0	0	0	0	-1	0	0	0	1	0	0	0
AQP2	1	0	0	1	0	0	0	1	0	0	0	0	0	0	0	0	0	0	0	0	0	0	0	0	0	0	0	0	1	0	0	1	0	0
AQP3	-1	0	0	0	0	0	0	0	0	0	0	0	0	0	0	0	1	0	0	0	0	0	0	0	0	-1	0	0	0	0	-1	0	-1	0
AQP4	-1	-1	0	0	0	-1	0	0	0	-1	-1	0	0	0	-1	-1	-1	0	0	-1	0	0	0	-1	-1	-1	0	-1	-1	-1	-1	0	1	-1
AQP4-AS1	-1	-1	0	0	0	-1	0	0	0	-1	-1	0	0	0	-1	-1	-1	0	0	-1	0	0	0	-1	-1	-1	0	-1	-1	-1	-1	0	1	-1
AQP5	1	0	0	1	0	0	0	1	0	0	0	0	0	0	0	0	0	0	0	0	0	0	0	0	0	0	0	0	1	0	0	1	0	0
AQP6	1	0	0	1	0	0	0	1	0	0	0	0	0	0	0	0	0	0	0	0	0	0	0	0	0	0	0	0	1	0	0	1	0	0
AQP7	-1	0	0	0	0	0	0	0	0	0	0	0	0	0	0	0	1	0	0	0	0	0	0	0	0	-1	0	0	0	0	-1	0	-1	0
AQP8	-1	0	0	0	0	0	1	0	0	0	0	0	0	0	0	-1	0	0	0	0	0	0	0	0	0	0	0	0	0	0	-1	0	-1	0
AQP9	0	0	1	0	0	1	1	1	0	0	0	0	0	0	1	1	0	0	0	1	1	0	0	-1	-1	0	0	-1	0	0	-1	0	0	1
AQR	0	0	0	0	0	1	0	1	0	0	0	0	0	0	1	1	0	0	0	1	1	0	0	-1	-1	0	0	-1	0	0	-1	0	0	1
ARAP1	1	0	0	0	0	0	0	1	1	1	0	0	0	0	1	1	0	0	0	1	0	0	0	0	0	0	0	0	1	0	1	0	1	1
ARAP2	-1	0	0	0	0	0	0	0	0	-1	0	0	0	0	0	-1	0	0	0	0	0	-1	0	0	0	-1	0	-1	0	0	-1	0	-1	1
ARAP3	1	0	0	0	0	1	0	0	0	0	0	0	0	0	0	1	1	0	0	1	0	0	0	1	0	0	0	1	0	1	-1	1	0	0
ARC	-1	0	0	0	1	0	0	0	0	0	1	0	1	0	1	-1	-1	1	0	0	0	0	1	0	1	1	0	0	0	0	0	0	1	1
ARCN1	1	0	0	0	0	0	0	1	1	1	0	0	0	0	1	1	0	0	0	1	0	0	0	0	0	0	0	0	0	1	1	0	0	1
AREG	-1	0	0	0	0	0	0	0	0	-1	0	0	0	0	0	0	0	0	0	0	0	-1	0	-1	-1	-1	0	-1	0	0	-1	0	1	1
AREL1	0	0	0	0	0	0	0	0	0	0	0	0	0	0	-1	0	-1	0	0	0	0	-1	0	0	0	-1	1	1	0	0	-1	0	-1	-1
ARF1	0	0	0	1	0	1	0	1	0	0	1	0	0	0	0	0	0	0	0	-1	0	-1	0	-1	0	1	0	0	0	0	0	0	0	0
ARF3	1	0	0	1	0	0	0	1	0	1	0	0	0	0	0	0	0	0	0	0	0	0	0	0	0	0	0	0	1	0	0	1	0	0
ARF4	0	0	0	0	0	-1	0	0	-1	0	0	0	0	0	-1	0	0	0	0	0	0	0	0	-1	0	0	0	0	0	-1	0	0	0	-1
ARF5	0	1	0	0	0	0	1	1	0	0	1	1	1	0	0	0	0	0	1	0	1	0	1	1	0	0	1	0	1	0	1	1	0	0
ARF6	0	0	0	0	0	0	0	0	0	0	0	0	0	0	-1	0	-1	0	0	0	0	-1	0	0	0	-1	1	0	0	0	-1	0	-1	-1
ARFGAP1	1	0	0	0	0	1	0	1	0	1	1	0	0	0	1	1	0	1	0	1	0	1	1	1	1	1	0	1	1	1	1	0	1	1
ARFGAP2	0	0	0	0	0	0	0	0	0	1	0	0	0	0	1	0	0	0	0	1	0	0	0	1	0	0	0	0	1	0	1	0	0	1
ARFGAP3	-1	-1	0	0	0	0	0	-1	0	-1	-1	0	0	0	-1	0	-1	0	0	-1	0	0	0	-1	-1	-1	0	0	0	-1	-1	0	-1	-1
ARFGEF1	-1	0	0	0	0	0	0	0	0	0	1	0	1	0	1	-1	0	0	0	-1	0	0	1	0	1	1	0	0	0	0	0	0	1	0
ARFGEF2	1	0	0	0	0	1	0	1	0	1	1	0	0	0	1	1	0	1	0	1	0	1	1	1	1	1	0	1	1	1	1	0	1	1
ARFGEF3	0	-1	0	0	0	-1	0	-1	0	0	1	0	0	0	-1	0	0	0	0	-1	0	0	0	1	0	-1	0	-1	0	0	0	0	-1	0
ARFIP1	-1	0	0	0	0	0	0	0	0	-1	-1	0	0	0	0	-1	0	0	0	-1	0	-1	0	-1	-1	-1	0	-1	0	-1	-1	0	1	1
ARFIP2	0	0	0	0	0	0	0	0	1	0	0	0	0	0	1	0	0	0	0	1	0	0	0	0	0	0	0	0	1	-1	1	0	0	1
ARFRP1	1	0	0	0	0	1	0	1	0	1	1	0	0	0	1	1	0	1	0	1	0	1	1	1	1	1	0	1	1	1	1	0	1	1
ARG1	0	-1	0	0	0	-1	0	-1	0	0	1	0	0	0	-1	0	1	0	0	0	0	0	0	1	0	-1	0	-1	0	0	0	0	-1	0
ARG2	0	0	0	0	0	0	0	0	0	0	0	0	0	0	-1	0	-1	0	0	0	0	-1	0	0	0	-1	1	1	0	0	-1	0	-1	-1
ARGFX	0	0	0	0	0	1	1	1	0	0	0	0	0	0	1	1	0	0	0	0	0	1	0	1	0	0	0	0	0	0	1	0	0	1
ARGFXP2	0	0	0	0	0	1	0	1	0	1	0	0	0	0	1	0	1	0	0	0	0	1	0	0	0	-1	0	0	0	0	0	0	0	1
ARGLU1	0	0	0	1	0	1	1	1	1	0	0	1	0	0	1	0	1	0	0	1	0	1	0	0	1	1	0	0	1	-1	1	0	0	1
ARHGAP1	0	0	0	0	0	0	0	0	0	1	0	0	0	0	1	0	0	0	0	1	0	0	0	0	0	0	0	0	1	0	1	0	0	1
ARHGAP10	-1	0	0	0	0	0	0	0	0	-1	-1	0	0	0	-1	0	0	0	0	-1	0	-1	0	-1	-1	-1	0	-1	0	0	-1	0	1	-1
ARHGAP11A	0	0	0	0	0	1	0	1	0	0	0	0	0	0	1	1	0	0	0	1	1	0	0	-1	-1	0	0	-1	0	0	-1	0	0	1
ARHGAP11B	0	0	0	0	0	1	0	1	0	0	0	0	0	0	1	0	0	0	0	1	1	0	0	-1	-1	0	0	-1	0	0	-1	0	0	1
ARHGAP12	0	0	0	0	0	-1	0	1	0	0	0	0	0	0	0	0	0	0	0	0	0	0	1	-1	0	-1	0	0	0	0	-1	0	0	0
ARHGAP15	0	0	0	0	0	0	0	0	0	0	0	0	0	0	0	1	0	0	0	0	0	0	0	0	0	0	0	0	0	0	1	0	0	0
ARHGAP17	-1	0	0	0	0	0	1	0	0	0	0	0	0	0	0	-1	0	0	0	0	0	0	0	0	0	0	0	0	0	0	-1	0	-1	0
ARHGAP18	0	-1	0	0	0	-1	0	-1	0	0	0	0	0	0	-1	0	1	0	0	0	0	0	0	0	0	-1	0	-1	0	0	0	0	-1	0
ARHGAP19	0	0	0	0	0	0	0	1	0	0	0	0	0	0	0	0	0	0	0	0	0	0	0	0	0	-1	0	0	0	0	-1	0	0	0
ARHGAP19-SLIT1	0	0	0	0	0	0	0	1	0	0	0	0	0	0	0	0	0	0	0	0	0	0	0	0	0	-1	0	0	0	0	-1	0	0	0
ARHGAP20	1	0	0	0	0	0	0	1	1	1	0	0	0	0	1	1	0	0	0	1	0	0	0	0	0	0	0	0	1	1	1	0	0	1
ARHGAP21	0	0	1	0	0	-1	0	1	0	0	-1	0	0	0	0	0	0	0	0	0	0	0	1	-1	0	-1	0	0	0	0	-1	0	0	0
ARHGAP22	0	0	0	0	0	0	0	1	0	0	-1	0	0	0	0	0	0	0	0	0	0	0	1	0	0	-1	0	0	1	0	-1	0	0	0
ARHGAP23	0	0	0	0	0	1	0	1	0	1	0	0	0	0	1	0	1	0	0	0	0	1	0	0	0	-1	0	0	0	0	0	0	0	1
ARHGAP24	-1	0	0	0	0	0	0	0	0	-1	-1	0	0	0	0	0	0	0	0	0	0	-1	0	-1	-1	-1	0	-1	0	0	-1	0	0	1
ARHGAP25	1	0	0	0	0	0	0	0	1	1	0	0	0	0	0	0	0	0	0	0	0	0	0	0	0	0	0	1	0	0	1	0	0	0
ARHGAP26	1	0	0	0	0	1	0	0	0	0	0	0	0	0	0	1	1	0	0	1	0	0	0	1	0	0	0	1	0	1	-1	1	0	0
ARHGAP26-AS1	1	0	0	0	0	1	0	0	0	0	0	0	0	0	0	1	1	0	0	1	0	0	0	1	0	0	0	1	0	1	-1	1	0	0
ARHGAP27	0	0	0	0	0	1	0	1	0	1	0	0	1	0	0	0	1	0	0	0	0	1	0	0	0	-1	0	0	0	0	0	0	0	0
ARHGAP28	1	-1	0	0	1	-1	0	-1	0	-1	-1	0	0	0	1	-1	-1	-1	0	-1	0	0	0	-1	-1	-1	0	0	0	-1	-1	0	0	1
ARHGAP29	-1	0	0	0	0	-1	1	0	0	0	0	0	0	0	0	0	0	0	0	-1	0	-1	0	-1	0	-1	0	0	0	-1	-1	0	0	0
ARHGAP30	0	0	0	1	0	1	1	1	0	0	0	0	0	0	0	0	0	0	0	0	0	0	0	-1	0	1	0	0	0	0	0	0	0	0
ARHGAP31	0	0	0	0	0	1	1	1	0	0	0	0	0	0	1	1	0	0	0	0	0	1	0	1	0	0	0	0	0	0	1	0	0	1
ARHGAP32	1	0	0	0	0	0	0	1	1	1	0	0	0	0	1	1	0	0	0	1	0	0	0	0	0	0	0	0	0	1	1	0	1	1
ARHGAP33	0	0	0	0	0	0	0	0	0	0	0	0	0	0	1	-1	0	0	0	0	0	0	0	-1	0	-1	0	1	0	0	1	0	1	1
ARHGAP35	-1	0	0	0	0	0	0	0	0	0	0	0	0	0	1	0	0	0	0	0	0	0	0	-1	-1	-1	0	1	0	0	-1	0	1	1
ARHGAP39	-1	0	0	0	1	0	0	0	0	0	1	0	1	0	1	-1	-1	1	0	0	0	0	1	0	1	1	0	0	0	0	0	0	1	1
ARHGAP40	1	0	0	0	0	1	-1	1	0	1	1	0	0	0	1	1	0	1	0	1	0	1	1	1	1	1	0	1	1	1	1	0	1	1
ARHGAP42	1	0	0	0	0	0	0	0	1	1	0	0	0	0	1	1	0	0	0	1	0	0	0	0	0	0	0	0	1	1	1	0	1	1
ARHGAP44	-1	-1	0	0	0	0	0	0	0	-1	-1	0	0	0	-1	0	-1	0	0	-1	0	-1	0	-1	-1	-1	0	0	0	-1	0	0	-1	-1
ARHGAP45	-1	0	0	0	0	-1	1	0	0	0	0	0	0	0	-1	0	0	0	0	0	0	0	0	-1	0	-1	0	-1	0	-1	0	0	-1	-1
ARHGAP5	0	0	-1	0	0	0	0	0	0	0	0	0	0	0	-1	0	-1	0	0	0	0	1	0	0	0	-1	1	0	0	0	-1	0	-1	-1
ARHGAP5-AS1	0	0	-1	0	0	0	0	0	0	0	0	0	0	0	-1	0	-1	0	0	0	0	1	0	0	0	-1	1	0	0	0	-1	0	-1	-1
ARHGAP8	-1	-1	0	0	0	0	1	-1	0	-1	-1	0	0	0	-1	0	-1	0	0	-1	0	0	0	-1	-1	-1	0	0	0	-1	-1	0	-1	-1
ARHGAP9	0	0	0	1	0	0	0	1	0	0	0	0	0	0	0	0	0	0	0	0	0	0	0	0	0	0	0	0	0	0	0	1	0	0
ARHGDIA	0	1	0	0	0	1	0	1	0	1	-1	0	1	0	0	0	1	0	0	0	0	1	0	0	0	-1	0	0	1	1	0	0	0	0
ARHGDIB	1	0	0	1	0	0	1	1	0	1	-1	0	0	0	0	1	0	0	0	1	0	0	0	0	1	-1	0	1	1	0	0	0	0	0
ARHGDIG	0	0	-1	0	0	0	0	0	0	0	0	0	-1	0	0	-1	0	0	0	0	0	0	0	0	0	0	0	0	0	0	-1	0	-1	0
ARHGEF1	0	0	0	0	0	0	0	0	0	0	0	0	0	0	1	0	0	0	0	0	0	0	0	-1	0	-1	0	1	0	0	1	0	0	1
ARHGEF10	-1	0	0	0	0	-1	0	0	0	0	1	0	0	0	-1	-1	-1	0	0	0	0	0	0	-1	-1	-1	0	0	0	-1	0	0	-1	-1
ARHGEF10L	-1	0	0	-1	0	0	0	0	0	0	-1	0	0	0	0	0	0	0	0	-1	0	-1	0	-1	0	-1	0	0	0	0	-1	0	0	0
ARHGEF11	0	0	0	1	0	1	1	1	0	0	0	0	0	0	0	0	0	0	0	0	0	0	0	-1	0	1	0	0	0	0	0	0	0	0
ARHGEF12	1	0	0	0	0	0	0	1	1	1	0	0	0	0	1	1	0	0	0	1	0	0	0	0	0	0	0	0	0	1	1	0	0	1
ARHGEF15	-1	-1	0	0	0	0	0	0	0	-1	-1	0	0	0	-1	0	-1	0	0	-1	0	-1	0	-1	-1	-1	0	0	1	-1	0	0	-1	-1
ARHGEF16	-1	0	0	-1	0	0	1	0	0	0	0	0	0	0	0	0	0	0	0	-1	0	-1	0	-1	0	-1	0	0	0	0	-1	0	0	0
ARHGEF17	1	0	0	0	0	0	0	1	1	1	0	0	0	0	1	1	0	0	0	1	0	0	0	0	0	0	0	0	1	0	1	0	1	1
ARHGEF18	-1	0	0	0	0	0	0	0	0	0	0	0	0	0	-1	0	0	0	0	0	0	0	0	-1	0	-1	0	0	0	-1	0	0	-1	-1
ARHGEF19	-1	0	0	-1	0	0	0	0	0	0	-1	0	0	0	0	0	0	0	0	-1	0	-1	0	-1	0	-1	0	0	0	0	-1	0	0	0
ARHGEF2	0	0	0	1	0	1	1	1	0	0	0	0	0	0	0	0	0	0	0	0	0	0	0	-1	0	1	0	0	0	0	0	0	0	0
ARHGEF25	0	0	0	1	0	0	0	1	0	0	0	0	0	0	0	0	0	0	0	0	0	0	0	0	0	0	0	0	0	0	0	1	0	0
ARHGEF26	1	0	0	0	0	1	1	1	0	0	0	0	0	0	0	1	0	0	0	0	0	1	0	1	0	0	0	0	0	0	1	0	0	0
ARHGEF26-AS1	1	0	0	0	0	1	1	1	0	0	0	0	0	0	0	1	0	0	0	0	0	1	0	1	0	0	0	0	0	0	1	0	0	0
ARHGEF28	0	0	0	0	0	1	0	1	0	0	0	0	0	0	0	0	1	0	0	0	0	0	0	1	0	0	0	0	1	0	-1	1	0	0
ARHGEF3	0	0	0	0	0	-1	0	0	-1	0	0	0	0	0	-1	0	0	0	0	0	0	0	0	-1	0	0	0	0	0	-1	0	0	0	-1
ARHGEF3-AS1	0	0	0	0	0	-1	0	0	-1	0	0	0	0	0	-1	0	0	0	0	0	0	0	0	-1	0	0	0	0	0	-1	0	0	0	-1
ARHGEF33	0	0	0	0	0	0	1	0	1	1	0	0	0	0	0	0	0	0	0	0	0	0	0	0	0	0	0	1	0	0	1	0	0	0
ARHGEF34P	0	1	0	0	0	0	1	1	0	0	1	1	0	0	0	1	0	1	1	0	1	0	1	1	0	0	1	0	1	0	1	1	0	0
ARHGEF35	0	1	0	0	0	0	1	1	0	0	1	1	0	0	0	1	0	0	1	0	1	0	1	1	0	0	1	0	1	0	1	1	0	0
ARHGEF37	1	0	0	0	0	0	0	0	0	0	0	0	0	0	0	1	1	0	0	1	0	0	0	1	0	0	0	1	0	1	-1	1	0	0
ARHGEF38	-1	0	0	0	0	0	0	0	0	-1	-1	0	0	0	0	-1	0	0	0	0	0	-1	0	-1	-1	-1	0	-1	-1	0	-1	0	0	1
ARHGEF38-IT1	-1	0	0	0	0	0	0	0	0	-1	-1	0	0	0	0	-1	0	0	0	0	0	-1	0	-1	-1	-1	0	-1	-1	0	-1	0	0	1
ARHGEF39	-1	0	0	0	0	0	0	0	0	0	0	0	0	0	0	0	1	0	0	0	0	0	0	0	0	-1	0	0	0	0	-1	0	-1	0
ARHGEF4	1	0	0	0	0	0	0	0	0	0	0	0	0	0	0	1	0	0	0	0	0	0	0	0	0	0	0	0	0	0	1	0	0	0
ARHGEF40	0	0	-1	0	0	0	0	0	0	0	0	0	0	0	-1	0	-1	0	0	0	0	-1	0	0	0	-1	0	0	0	0	-1	0	-1	-1
ARHGEF5	0	1	0	0	0	0	1	1	0	0	1	1	0	0	0	1	0	0	1	0	1	0	1	1	0	0	1	0	1	0	1	1	0	0
ARHGEF7	0	0	0	1	0	1	1	1	1	0	0	1	0	0	1	0	1	0	0	1	0	1	0	0	1	1	0	0	1	-1	1	0	0	1
ARID1A	-1	0	0	0	0	0	0	0	0	0	-1	0	0	0	0	0	0	0	0	-1	0	-1	0	-1	0	-1	0	0	0	0	-1	0	0	0
ARID1B	0	-1	0	0	0	-1	0	-1	0	0	1	0	0	0	-1	-1	1	0	0	-1	0	-1	0	1	0	-1	0	-1	0	0	0	0	-1	0
ARID2	1	0	0	1	0	0	1	1	0	1	0	-1	0	0	0	0	0	0	0	0	0	0	0	0	0	0	0	0	1	0	0	1	0	0
ARID3A	-1	0	0	0	0	-1	1	0	0	0	0	0	0	0	-1	0	0	0	0	0	0	0	0	-1	0	-1	0	-1	0	-1	0	0	-1	-1
ARID3B	0	0	1	0	0	1	1	1	0	0	0	0	0	0	1	1	0	0	0	1	1	0	0	0	-1	1	0	0	0	0	-1	0	0	1
ARID3C	-1	0	0	0	0	0	0	0	0	0	0	0	0	0	0	0	1	0	0	0	0	0	0	0	0	-1	0	0	0	0	-1	0	-1	0
ARID4A	0	0	0	0	0	0	0	0	0	0	0	0	0	0	-1	0	-1	0	0	0	0	-1	0	0	0	-1	1	0	0	0	-1	0	-1	-1
ARID4B	0	0	0	1	0	1	0	1	0	0	1	0	0	0	0	0	0	0	0	-1	0	-1	0	-1	0	1	0	0	0	0	0	0	0	0
ARID5A	1	0	0	0	0	0	1	0	0	1	0	0	0	0	0	1	0	0	0	0	0	0	0	0	0	0	0	1	0	0	1	0	0	0
ARID5B	1	0	0	0	0	0	0	1	0	0	0	0	0	0	0	0	0	0	0	0	0	0	0	0	0	-1	0	0	1	0	-1	0	0	0
ARIH1	0	0	1	0	0	1	1	1	0	0	0	0	0	0	1	1	0	0	0	1	1	0	0	0	-1	1	0	0	0	0	-1	0	0	1
ARIH2	-1	0	0	0	0	-1	0	0	0	0	0	0	0	0	-1	0	0	0	0	0	0	0	0	-1	0	0	0	0	0	-1	0	0	0	-1
ARIH2OS	-1	0	0	0	0	-1	0	0	0	0	0	0	0	0	-1	0	0	0	0	0	0	0	0	-1	0	0	0	0	0	-1	0	0	0	-1
ARL1	0	0	0	1	0	0	0	-1	0	0	0	0	0	0	0	0	0	1	0	0	0	0	0	0	0	0	0	0	0	0	0	1	0	0
ARL10	1	0	0	0	0	1	0	0	0	0	0	0	0	0	0	1	1	0	0	0	0	0	0	1	0	0	0	1	0	1	-1	1	0	0
ARL11	0	0	0	1	-1	1	0	0	0	0	0	1	0	0	1	0	1	0	0	1	0	1	0	0	1	-1	0	0	0	-1	1	0	0	1
ARL13B	0	0	0	0	0	1	0	1	0	0	0	0	0	0	1	1	0	0	0	0	0	1	0	0	0	0	0	0	0	0	0	0	0	1
ARL14	1	0	0	0	0	1	1	1	0	0	0	0	0	0	0	1	0	0	0	0	0	1	0	1	0	0	0	0	0	0	1	0	0	0
ARL14EP	0	0	0	0	0	0	0	0	0	1	0	0	0	0	1	0	0	0	0	1	0	0	0	0	0	0	0	0	1	0	1	0	0	1
ARL14EPL	0	0	0	0	0	1	0	0	0	0	0	0	1	0	0	-1	1	0	0	1	0	-1	0	1	0	0	0	1	0	1	-1	1	0	0
ARL15	0	0	0	0	0	1	0	0	0	0	0	0	0	0	1	0	1	0	0	-1	0	0	0	1	0	0	0	0	1	0	-1	0	0	1
ARL16	0	1	0	0	0	1	0	1	0	1	-1	0	1	0	0	0	1	0	0	0	0	1	0	0	0	-1	0	0	1	1	0	0	0	0
ARL17A	0	0	0	0	0	1	0	1	0	1	0	0	1	0	1	0	1	0	0	0	0	1	0	0	0	0	0	1	1	0	0	0	1	0
ARL2	0	0	0	0	0	0	0	1	0	1	0	0	0	0	1	1	0	0	0	1	0	0	0	0	0	0	0	0	1	0	1	0	0	1
ARL2-SNX15	0	0	0	0	0	0	0	1	0	1	0	0	0	0	1	1	0	0	0	1	0	0	0	0	0	0	0	0	1	0	1	0	0	1
ARL2BP	0	0	0	0	0	0	1	0	0	0	0	0	0	0	0	0	-1	0	0	0	0	0	0	-1	0	0	0	0	1	0	-1	0	0	0
ARL3	0	0	0	0	0	0	0	1	0	0	0	0	1	0	0	0	0	0	0	0	0	0	0	0	0	-1	0	0	0	0	-1	0	0	0
ARL4A	0	1	1	0	0	0	-1	1	0	0	1	1	0	0	-1	1	1	0	1	0	1	0	0	1	0	1	1	1	1	0	1	1	1	-1
ARL4C	-1	0	0	0	0	0	0	0	0	0	0	0	0	0	0	0	0	0	0	0	0	0	0	0	0	0	0	0	0	0	1	0	0	0
ARL4D	0	0	0	0	0	1	0	1	0	1	0	0	0	0	0	0	1	0	0	0	0	1	0	0	0	-1	0	0	0	0	0	0	0	0
ARL5A	1	0	0	0	0	0	0	0	0	0	0	0	0	0	0	1	0	0	0	0	0	0	0	0	0	-1	0	0	0	0	1	0	0	0
ARL5B	0	0	1	0	0	-1	0	1	0	0	-1	0	0	0	0	0	0	0	0	0	0	0	1	-1	0	-1	0	0	0	0	-1	0	0	0
ARL5C	0	0	0	0	0	1	0	1	0	1	0	0	0	0	0	0	1	0	0	0	0	1	0	0	0	-1	0	0	0	0	0	0	0	0
ARL6	0	0	0	0	0	1	-1	1	0	0	0	0	0	0	1	1	0	0	0	0	0	1	0	0	0	0	0	0	0	0	0	0	0	1
ARL6IP1	-1	0	0	0	0	0	1	0	0	0	0	0	0	0	0	-1	-1	0	0	0	0	0	0	0	0	0	0	0	0	0	-1	0	-1	0
ARL6IP4	0	0	0	1	0	1	0	1	0	0	1	0	0	0	0	0	0	1	0	1	0	-1	0	0	0	-1	0	0	0	0	0	1	0	0
ARL6IP5	0	0	0	0	0	-1	0	0	-1	0	0	0	0	0	-1	-1	0	0	0	0	0	0	0	-1	0	1	0	0	0	-1	0	0	0	-1
ARL6IP6	1	0	0	0	0	0	0	0	0	0	0	0	0	0	0	1	0	0	0	0	0	0	0	0	0	-1	0	0	0	0	1	0	0	0
ARL8A	0	0	0	1	0	1	0	1	0	0	0	0	0	0	0	0	0	0	0	0	0	-1	0	-1	0	1	0	0	0	0	0	0	0	0
ARL8B	-1	0	0	0	0	-1	0	0	0	0	0	0	0	0	-1	-1	0	0	0	0	0	0	0	-1	0	0	0	0	0	-1	0	0	0	-1
ARL9	-1	0	0	0	0	0	0	0	0	-1	0	0	0	0	0	0	0	0	0	0	0	-1	0	-1	-1	-1	0	-1	0	0	-1	0	0	1
ARMC1	-1	0	0	0	0	0	0	0	0	0	1	0	0	0	1	-1	0	0	0	-1	0	0	1	0	1	1	0	0	0	0	0	0	1	0
ARMC10	0	1	0	0	0	0	1	1	0	0	1	1	0	0	0	0	0	0	1	0	1	0	1	0	0	0	1	1	1	0	1	1	0	0
ARMC12	0	-1	0	0	0	-1	0	-1	0	0	0	0	0	0	0	0	-1	0	0	-1	0	0	0	-1	0	-1	0	-1	0	-1	0	0	0	0
ARMC2	0	-1	0	0	0	-1	0	-1	0	-1	0	0	0	0	-1	0	0	0	0	0	0	0	0	-1	0	-1	0	-1	0	-1	0	0	-1	0
ARMC3	0	0	1	0	0	-1	0	1	0	0	-1	0	0	0	0	0	0	0	0	0	0	0	1	-1	0	-1	0	0	0	0	-1	0	0	0
ARMC4	0	0	0	0	0	-1	0	1	0	0	-1	0	0	0	0	0	0	0	0	0	0	0	1	-1	0	-1	0	0	0	0	-1	0	0	0
ARMC5	-1	0	0	0	0	0	1	0	0	0	0	0	0	0	0	-1	0	0	0	0	0	0	0	0	0	0	0	0	0	0	-1	0	0	0
ARMC6	-1	0	0	0	0	0	0	0	0	0	0	0	0	0	-1	0	0	0	0	0	0	0	0	-1	0	-1	0	1	0	-1	0	0	-1	-1
ARMC7	0	-1	0	0	0	1	0	1	0	1	-1	0	1	0	0	0	1	0	0	0	0	1	0	0	0	-1	0	0	1	1	0	0	0	0
ARMC8	0	0	0	0	0	1	1	1	0	0	0	0	0	0	0	1	0	0	0	0	0	1	0	1	0	0	0	0	0	0	1	0	0	0
ARMC9	-1	0	0	0	0	0	0	0	0	0	0	0	0	0	0	0	0	0	0	0	0	0	0	0	0	0	0	0	0	0	1	0	0	0
ARMS2	0	0	0	0	0	0	0	1	0	0	0	0	1	0	0	0	0	0	0	0	0	0	0	0	0	-1	0	0	0	0	-1	0	0	0
ARMT1	0	-1	0	0	0	-1	0	-1	0	0	1	0	0	0	-1	-1	1	0	0	-1	0	-1	0	1	0	-1	0	-1	0	0	0	0	-1	0
ARNT2	0	0	1	0	0	1	1	1	0	0	0	0	0	0	1	0	0	0	0	1	1	0	0	1	-1	1	0	0	0	0	0	0	0	1
ARNTL	0	0	0	0	0	0	0	0	0	1	0	0	0	0	1	0	0	0	0	1	0	0	0	0	0	0	0	0	1	-1	1	0	0	1
ARNTL2	1	0	0	1	0	0	1	1	0	1	0	0	0	0	1	1	0	0	-1	1	0	0	0	0	1	0	0	1	1	0	0	1	0	1
ARPC1A	0	1	0	0	0	0	1	1	0	0	1	1	0	0	0	0	0	0	1	0	1	0	1	0	0	0	1	1	1	0	1	1	0	0
ARPC1B	0	1	0	0	0	0	1	1	0	0	1	1	0	0	0	0	0	0	1	0	1	0	1	0	0	0	1	1	1	0	1	1	0	0
ARPC2	1	0	0	0	0	0	0	0	0	0	0	0	0	0	0	0	0	0	0	0	0	0	0	0	0	0	0	0	0	0	1	0	0	0
ARPC3	0	0	0	1	0	0	0	1	0	0	0	0	0	0	0	0	0	1	0	0	0	0	0	0	0	-1	0	0	0	0	0	1	0	0
ARPC4	-1	0	0	0	0	-1	0	0	0	0	0	0	0	0	-1	-1	0	0	0	0	0	0	0	-1	0	0	0	0	0	-1	0	0	0	-1
ARPC4-TTLL3	-1	0	0	0	0	-1	0	0	0	0	0	0	0	0	-1	-1	0	0	0	0	0	0	0	-1	0	0	0	0	0	-1	0	0	0	-1
ARPC5	0	0	0	0	0	1	0	1	0	0	0	0	0	0	0	-1	0	0	0	0	0	0	0	-1	0	1	0	0	0	0	0	0	0	0
ARPC5L	0	0	0	0	0	1	0	0	0	0	0	0	0	0	0	0	1	0	0	0	0	0	1	-1	0	0	0	0	0	0	1	0	0	0
ARPIN	0	1	1	0	0	1	-1	1	0	0	0	0	0	0	1	0	0	0	0	1	1	0	0	0	-1	1	0	0	0	0	0	0	0	1
ARPP19	0	0	0	0	0	1	1	1	0	0	0	0	0	0	1	1	0	0	0	1	1	0	0	-1	-1	0	0	-1	0	0	-1	0	0	1
ARPP21	-1	0	0	0	0	-1	0	0	0	0	0	0	0	0	-1	-1	0	0	0	0	0	0	0	-1	0	0	0	0	0	-1	0	0	0	-1
ARRB1	1	0	0	0	0	0	0	1	1	1	0	0	0	0	1	1	0	0	0	1	0	0	0	0	0	0	0	0	1	1	1	0	1	1
ARRB2	-1	-1	0	0	0	0	0	0	0	-1	-1	0	0	0	-1	0	-1	0	0	-1	0	-1	0	-1	-1	-1	0	0	1	-1	0	0	-1	-1
ARRDC1-AS1	0	0	0	0	0	1	1	0	0	0	0	0	0	0	0	0	1	0	0	0	0	0	1	1	0	0	-1	0	0	0	1	0	0	0
ARRDC2	-1	0	0	0	0	0	0	0	0	0	0	0	0	0	-1	0	0	0	0	0	0	0	0	-1	0	-1	0	1	0	-1	0	0	-1	-1
ARRDC3	0	0	0	0	0	1	0	0	0	0	0	0	0	0	0	-1	1	0	0	-1	0	-1	0	1	0	0	0	0	1	1	-1	1	0	0
ARRDC3-AS1	0	0	0	0	0	1	0	0	0	0	0	0	0	0	0	-1	1	0	0	-1	0	-1	0	1	0	0	0	0	1	1	-1	1	0	0
ARRDC4	0	1	1	0	0	1	1	1	0	0	0	0	0	0	1	0	0	0	0	1	1	0	0	0	-1	1	0	0	0	0	0	0	0	1
ARRDC5	-1	0	0	0	0	-1	0	0	0	0	0	0	0	0	-1	0	0	0	0	0	0	0	0	-1	0	-1	0	0	0	-1	0	0	0	-1
ARSA	-1	-1	0	0	0	0	1	-1	0	-1	-1	0	0	0	-1	0	-1	0	0	-1	0	0	0	-1	-1	-1	0	0	0	-1	-1	0	-1	-1
ARSB	0	0	0	0	0	1	0	1	0	0	0	0	0	0	0	0	1	0	0	-1	0	0	0	1	0	0	0	0	1	1	-1	1	0	0
ARSG	0	0	0	0	0	1	0	1	0	1	-1	0	1	0	0	0	1	0	0	0	0	1	0	0	0	-1	0	0	1	0	0	0	0	0
ARSI	1	0	0	0	0	0	0	0	0	0	0	0	0	0	0	1	1	0	0	1	0	0	0	1	0	0	0	1	0	1	-1	1	0	0
ARSJ	-1	0	0	0	0	0	0	0	0	-1	-1	0	0	0	0	0	0	0	0	0	0	-1	0	-1	-1	-1	0	-1	-1	0	-1	0	0	1
ARSK	0	0	0	0	0	1	0	1	0	0	0	0	0	0	0	-1	1	0	0	-1	0	-1	0	1	0	0	0	1	0	1	-1	1	0	0
ART1	0	0	0	0	0	0	0	0	1	0	0	0	0	0	1	0	0	0	0	1	0	0	0	0	0	0	0	-1	1	-1	1	0	0	1
ART3	-1	0	0	0	0	0	0	0	0	-1	0	0	0	0	0	0	0	0	0	0	0	-1	0	-1	-1	-1	0	-1	0	0	-1	0	0	1
ART4	1	0	0	1	0	0	1	1	0	1	-1	0	0	0	0	1	0	0	0	1	0	0	0	0	1	-1	0	1	1	0	0	0	0	0
ART5	0	0	0	0	0	0	0	0	1	0	0	0	0	0	1	0	0	0	0	1	0	0	0	0	0	0	0	-1	1	-1	1	0	0	1
ARTN	-1	0	0	0	0	0	0	0	0	0	0	0	0	0	0	0	0	0	0	-1	0	-1	0	-1	0	-1	0	0	0	0	-1	0	0	0
ARV1	0	0	0	1	0	1	0	1	0	0	1	0	0	0	0	0	0	0	0	-1	0	-1	0	-1	0	1	0	0	0	0	0	0	0	0
ARVCF	-1	1	0	0	0	0	0	1	0	-1	-1	0	0	0	1	1	0	0	0	-1	0	0	0	-1	-1	-1	0	0	0	1	-1	0	0	1
AS3MT	0	0	0	0	0	0	0	1	0	0	0	0	1	0	0	0	0	0	0	0	0	0	0	0	0	-1	0	0	0	0	-1	0	0	0
ASAH1	-1	0	0	0	0	-1	0	0	0	0	-1	0	0	0	-1	0	-1	0	0	0	0	0	0	-1	-1	-1	0	0	0	-1	0	0	-1	-1
ASAH2	0	0	0	0	0	0	0	1	0	0	-1	0	0	0	0	0	0	0	0	0	0	0	0	0	0	-1	0	0	1	0	-1	0	0	0
ASAH2B	1	0	0	0	0	0	0	1	0	0	-1	0	0	0	0	0	0	0	0	0	0	0	0	0	0	-1	0	0	1	0	-1	0	0	0
ASAP1	-1	0	0	0	1	1	-1	0	0	1	1	0	1	0	1	0	-1	1	0	0	0	0	1	0	1	1	0	0	0	0	0	0	1	1
ASAP1-IT1	-1	0	0	0	1	1	-1	0	0	1	1	0	1	0	1	0	-1	1	0	0	0	0	1	0	1	1	0	0	0	0	0	0	1	1
ASAP1-IT2	-1	0	0	0	1	1	-1	0	0	1	1	0	1	0	1	0	-1	1	0	0	0	0	1	0	1	1	0	0	0	0	0	0	1	1
ASAP2	0	0	0	0	0	0	1	0	1	1	0	0	0	0	0	0	0	0	0	0	0	0	0	0	0	0	0	1	0	0	1	0	0	0
ASAP3	-1	0	0	-1	0	0	0	0	0	0	-1	0	0	0	0	0	0	0	0	-1	0	-1	0	-1	0	-1	0	0	0	0	-1	0	0	0
ASB1	-1	0	0	0	0	0	0	0	0	0	0	0	0	0	0	0	0	0	0	0	0	0	0	0	0	0	-1	0	0	0	1	0	0	0
ASB10	0	1	0	0	0	0	1	1	0	0	1	1	0	0	1	1	0	0	1	0	1	0	1	1	0	0	1	0	1	0	1	1	0	1
ASB13	0	0	1	0	0	0	1	1	0	0	-1	0	0	0	0	0	0	0	0	0	0	0	1	-1	0	-1	0	0	0	0	-1	0	0	0
ASB14	0	0	0	0	0	-1	0	0	-1	0	0	0	0	0	-1	0	0	0	0	0	0	0	0	-1	0	0	0	0	0	-1	0	0	0	-1
ASB15	0	1	0	0	0	0	1	1	0	0	1	1	0	0	0	0	0	0	1	0	1	0	1	0	0	0	1	0	1	0	1	1	0	0
ASB16	0	0	0	0	0	1	0	1	0	1	0	0	0	0	0	0	1	0	0	0	0	1	0	0	0	-1	0	0	0	0	0	0	0	0
ASB16-AS1	0	0	0	0	0	1	0	1	0	1	0	0	0	0	0	0	1	0	0	0	0	1	0	0	0	-1	0	0	0	0	0	0	0	0
ASB17	-1	0	0	0	0	-1	0	0	0	0	0	0	0	0	0	0	0	0	0	-1	0	-1	0	-1	0	-1	0	0	0	-1	-1	0	0	0
ASB18	-1	0	0	0	0	0	0	0	0	0	0	0	0	0	0	0	0	0	0	0	0	0	0	0	0	0	0	0	0	0	1	0	0	0
ASB2	0	0	0	0	0	0	0	0	0	0	0	0	0	0	-1	-1	-1	0	0	0	0	-1	0	0	0	-1	1	1	0	1	-1	0	-1	-1
ASB3	0	0	0	0	0	0	1	0	1	1	0	0	0	0	0	0	0	0	0	0	0	0	0	0	0	0	0	1	0	0	1	0	0	0
ASB4	0	1	0	0	0	0	1	1	0	0	1	1	0	0	0	0	0	0	1	0	1	0	1	0	0	0	1	1	1	0	1	1	0	0
ASB5	-1	0	0	0	0	0	0	0	-1	-1	-1	0	0	0	-1	-1	0	0	0	0	0	-1	0	-1	-1	-1	0	-1	0	0	-1	0	1	-1
ASB6	0	0	0	0	0	1	0	0	0	0	0	0	0	0	0	0	1	0	0	0	0	0	1	1	0	0	0	0	0	0	1	0	0	0
ASB7	0	1	1	0	0	1	-1	1	0	0	0	0	0	0	1	0	0	0	0	1	1	0	0	0	-1	1	0	0	0	0	0	0	0	1
ASB8	1	0	0	1	0	0	1	1	0	1	0	0	0	0	0	0	0	0	0	0	0	0	0	0	0	0	0	0	1	0	0	1	0	0
ASB9P1	0	1	1	0	0	1	-1	1	0	0	0	0	0	0	1	0	0	0	0	1	1	0	0	0	-1	1	0	0	0	0	0	0	0	1
ASCC1	1	0	0	0	0	0	0	1	0	0	0	0	0	0	0	0	0	0	0	0	0	0	0	0	0	-1	1	0	1	0	-1	0	0	0
ASCC2	-1	-1	0	0	0	0	0	-1	0	-1	-1	0	0	0	1	0	0	0	0	-1	0	0	0	-1	-1	-1	0	0	0	-1	-1	0	-1	1
ASCC3	0	-1	0	0	0	-1	0	-1	0	-1	0	0	0	0	-1	-1	0	0	0	0	0	0	0	-1	0	-1	0	-1	0	-1	0	0	-1	0
ASCL1	0	0	0	1	0	0	0	-1	0	0	0	0	0	0	0	0	0	1	0	0	0	0	0	0	0	-1	0	0	0	0	0	1	0	0
ASCL2	0	0	0	0	0	0	0	0	1	0	0	0	0	0	1	0	0	0	0	1	0	0	0	0	0	0	0	-1	1	-1	1	0	0	1
ASCL3	0	0	0	0	0	0	0	0	1	1	0	0	0	0	1	0	0	0	0	1	0	0	0	0	0	0	0	0	1	-1	1	0	0	1
ASCL4	0	0	0	1	0	0	0	-1	0	0	0	0	0	0	0	0	0	1	0	0	0	0	0	0	0	-1	0	0	0	0	0	1	0	0
ASCL5	0	0	0	1	0	1	0	1	0	0	0	0	0	0	0	0	0	0	0	0	0	-1	0	-1	0	1	0	0	0	0	0	0	0	0
ASF1A	0	-1	0	0	0	-1	0	-1	0	0	0	0	0	0	-1	0	0	0	0	0	0	0	0	-1	0	-1	0	-1	0	-1	0	0	-1	0
ASF1B	-1	0	0	0	0	0	0	0	0	0	0	0	0	0	-1	0	0	0	0	0	0	0	0	-1	0	-1	0	1	0	0	0	0	-1	-1
ASGR1	-1	-1	0	0	0	0	0	-1	0	-1	-1	0	0	0	-1	0	-1	0	0	-1	0	-1	0	-1	-1	-1	0	0	1	-1	0	0	-1	-1
ASGR2	-1	-1	0	0	0	0	0	-1	0	-1	-1	0	0	0	-1	0	-1	0	0	-1	0	-1	0	-1	-1	-1	0	0	1	-1	0	0	-1	-1
ASH1L	0	0	0	1	0	1	1	1	0	0	0	0	0	0	0	0	0	0	0	0	0	0	0	-1	0	1	0	0	0	0	0	0	0	0
ASH1L-AS1	0	0	0	1	0	1	1	1	0	0	0	0	0	0	0	0	0	0	0	0	0	0	0	-1	0	1	0	0	0	0	0	0	0	0
ASH2L	-1	0	0	0	0	-1	0	0	0	0	1	0	0	0	-1	0	0	0	0	0	0	0	0	1	-1	1	0	0	0	1	0	0	-1	-1
ASIC1	1	0	0	1	0	0	0	1	0	0	0	0	0	0	0	0	0	0	0	0	0	0	0	0	0	0	0	0	1	0	0	1	0	0
ASIC2	0	0	0	0	0	1	0	1	0	1	0	0	0	0	0	0	1	0	0	0	0	1	0	0	0	-1	0	0	0	0	0	0	0	0
ASIC3	0	1	0	0	0	0	1	1	0	0	1	1	0	0	1	1	0	0	1	0	1	0	1	1	0	0	1	0	1	0	1	1	0	1
ASIC4	1	0	0	0	0	0	0	0	0	0	0	0	0	0	0	0	0	0	0	0	0	0	0	0	0	0	0	0	0	0	1	0	0	0
ASIC5	-1	0	0	0	0	0	1	0	0	-1	-1	0	0	0	0	-1	0	0	0	0	0	-1	0	-1	-1	-1	0	-1	0	-1	-1	0	1	1
ASIP	1	0	0	0	0	1	0	1	0	1	1	0	0	0	1	1	0	1	0	1	0	1	1	1	1	1	0	1	1	1	1	0	1	1
ASL	0	1	0	0	0	0	1	1	0	0	1	1	0	0	0	0	0	0	1	0	1	0	0	0	0	0	1	1	1	0	1	1	0	0
ASNA1	-1	0	0	0	0	0	0	0	0	0	0	0	0	0	-1	0	0	0	0	0	0	0	0	-1	0	-1	0	1	0	0	0	0	-1	-1
ASNS	0	1	0	0	0	0	1	1	0	0	1	1	0	0	0	0	0	0	1	0	1	0	1	0	0	0	1	1	1	0	1	1	0	0
ASNSD1	1	0	0	0	0	0	0	0	0	0	0	0	0	0	0	1	0	0	0	0	0	0	0	0	0	0	0	0	0	0	1	0	0	0
ASPA	1	-1	0	0	0	0	0	0	0	-1	-1	0	0	0	-1	0	-1	0	0	-1	0	-1	0	-1	-1	-1	0	0	1	-1	0	0	-1	-1
ASPDH	-1	0	0	0	0	0	0	0	0	0	0	0	0	0	1	1	0	0	0	0	0	0	0	-1	0	-1	0	1	0	0	-1	0	0	1
ASPG	0	0	0	0	0	-1	0	0	0	0	0	0	0	0	-1	-1	-1	0	0	0	0	-1	0	0	0	-1	1	1	0	1	-1	0	-1	-1
ASPH	-1	0	0	0	0	0	0	0	0	0	1	0	0	0	1	-1	0	0	0	-1	0	0	1	0	1	1	0	0	0	0	0	0	1	0
ASPHD1	-1	0	0	0	0	0	1	0	0	0	0	0	0	0	0	-1	0	0	0	0	0	0	0	0	0	0	0	0	0	0	-1	0	0	0
ASPHD2	-1	-1	0	0	0	0	0	-1	0	-1	-1	0	0	0	-1	0	0	0	0	-1	0	0	0	-1	-1	-1	0	0	0	-1	-1	0	1	-1
ASPM	0	0	0	0	0	1	0	1	0	0	0	0	0	0	0	0	0	0	0	0	0	-1	0	-1	0	1	0	0	0	0	0	0	0	0
ASPN	-1	0	0	0	0	0	0	0	0	0	0	0	0	0	0	0	1	0	0	0	0	0	1	1	0	0	0	0	0	0	1	0	0	0
ASPRV1	1	0	0	0	0	0	0	0	1	1	0	0	0	0	0	0	0	0	0	0	0	0	0	0	0	0	0	1	0	0	1	0	0	0
ASPSCR1	0	1	0	0	0	1	0	1	0	1	-1	0	1	0	0	0	1	0	0	0	0	1	0	0	0	-1	0	0	1	1	0	0	0	0
ASRGL1	0	0	0	0	0	0	0	1	0	1	0	0	0	0	1	1	0	0	0	1	0	0	0	0	0	0	0	0	1	0	1	0	0	1
ASS1	0	0	0	0	0	1	1	0	0	0	0	0	0	0	0	0	1	0	0	0	0	0	1	1	0	0	0	0	0	0	1	0	0	0
ASTE1	0	0	0	0	0	1	1	1	0	0	0	0	0	0	0	1	0	0	0	0	0	1	0	1	0	0	0	0	0	0	1	0	0	0
ASTL	1	0	0	0	0	0	1	0	0	1	0	0	0	0	0	1	0	0	0	0	0	0	0	0	0	0	0	1	0	0	1	0	0	0
ASTN1	0	0	0	0	0	1	0	0	0	0	0	0	0	0	0	-1	0	0	0	0	0	0	0	-1	0	1	0	0	0	0	0	0	0	0
ASTN2	0	0	0	0	0	1	0	0	0	0	0	0	0	0	0	0	1	0	0	0	0	0	1	-1	0	0	0	0	0	-1	1	0	0	0
ASTN2-AS1	0	0	0	0	0	1	0	0	0	0	0	0	0	0	0	0	1	0	0	0	0	0	1	-1	0	0	0	0	0	-1	1	0	0	0
ASUN	1	0	0	1	0	0	1	1	0	1	0	0	0	0	1	1	0	0	-1	1	0	0	0	0	1	0	0	1	1	0	0	1	0	1
ASXL1	1	0	0	0	0	1	0	1	0	1	1	0	0	0	1	1	0	1	0	1	0	1	1	1	1	1	0	1	1	1	1	0	1	1
ASXL2	0	0	0	0	0	0	1	0	0	1	0	0	0	0	0	0	0	0	0	0	0	0	0	0	0	0	0	1	0	0	1	0	0	0
ASXL3	-1	0	0	0	-1	-1	0	0	0	-1	-1	0	0	0	-1	-1	-1	-1	0	-1	0	0	0	-1	-1	-1	0	-1	-1	-1	-1	0	1	-1
ASZ1	0	1	0	0	0	0	1	1	0	0	1	1	0	0	0	0	0	0	1	0	1	0	1	0	0	0	1	0	1	0	1	1	0	0
ATAD1	0	0	0	0	0	0	0	1	0	0	0	0	0	0	0	0	0	0	0	0	0	0	0	0	0	-1	0	0	1	0	-1	0	0	0
ATAD2	-1	0	0	0	1	1	0	0	0	1	1	0	1	0	1	0	1	1	0	-1	0	0	1	0	1	1	0	0	0	0	0	0	1	1
ATAD2B	0	0	0	0	0	0	1	0	1	1	0	0	0	0	0	0	0	0	0	0	0	0	0	0	0	0	0	1	0	0	1	0	0	0
ATAD3A	-1	0	0	-1	0	0	0	0	0	0	0	0	0	0	0	0	0	0	0	-1	0	-1	0	-1	0	-1	0	0	0	0	-1	0	0	0
ATAD3B	-1	0	0	-1	0	0	0	0	0	0	0	0	0	0	0	0	0	0	0	-1	0	-1	0	-1	0	-1	0	0	0	0	-1	0	0	0
ATAD3C	-1	0	0	-1	0	0	0	0	0	0	0	0	0	0	0	0	0	0	0	-1	0	-1	0	-1	0	-1	0	0	0	0	-1	0	0	0
ATAD5	0	0	0	0	0	1	0	1	0	1	0	0	0	0	0	0	1	0	0	0	0	1	0	0	0	-1	0	0	0	0	0	0	0	0
ATAT1	0	-1	1	0	0	0	0	1	0	0	0	0	0	0	0	0	-1	-1	0	-1	0	0	0	-1	0	-1	0	-1	0	0	0	0	0	0
ATCAY	-1	0	0	0	0	-1	0	0	0	0	0	0	0	0	-1	0	0	0	0	0	0	0	0	-1	0	-1	0	-1	0	-1	0	0	-1	-1
ATE1	0	0	0	0	0	0	0	1	0	0	0	0	1	0	0	0	0	0	0	0	0	0	0	0	0	-1	0	0	0	0	-1	0	0	0
ATF1	1	0	0	1	0	0	0	1	0	0	0	0	0	0	0	0	0	0	0	0	0	0	0	0	0	0	0	0	1	0	0	1	0	0
ATF2	1	0	0	0	0	0	0	0	0	0	0	0	0	0	0	1	0	1	0	0	0	0	0	0	0	0	0	0	0	0	1	0	0	0
ATF3	0	0	0	1	0	1	0	1	0	0	1	0	0	0	0	0	0	0	0	-1	0	-1	0	-1	0	1	0	0	0	0	0	0	0	0
ATF4	-1	-1	0	0	0	0	0	-1	0	-1	-1	0	0	0	-1	0	-1	0	0	-1	0	0	0	-1	-1	-1	0	0	0	-1	-1	0	-1	-1
ATF5	-1	0	0	0	0	0	0	0	0	0	0	0	0	0	1	1	0	0	0	0	0	0	0	-1	-1	-1	0	1	0	0	-1	0	0	1
ATF6	0	0	0	1	0	1	1	1	0	0	0	0	0	0	0	0	0	0	0	0	0	0	0	-1	0	1	0	0	0	0	0	0	0	0
ATF6B	0	-1	1	0	0	0	0	1	0	0	0	0	0	0	0	0	-1	-1	0	-1	0	0	0	-1	0	-1	0	-1	0	-1	0	0	0	0
ATF7	0	0	0	1	0	0	0	1	0	0	0	0	0	0	0	0	0	0	0	0	0	0	0	0	0	0	0	0	1	0	0	1	0	0
ATF7IP	1	0	0	1	0	0	1	1	0	1	-1	0	0	0	0	1	0	0	0	1	0	0	0	0	1	-1	0	1	1	0	0	0	0	0
ATF7IP2	-1	0	0	0	0	0	0	0	0	0	0	0	0	0	0	-1	0	0	0	0	0	0	0	0	0	0	0	0	0	0	-1	0	-1	0
ATG10	0	0	0	0	0	1	0	1	0	0	0	0	0	0	0	0	1	0	0	-1	0	0	0	1	0	0	0	0	1	1	-1	1	0	0
ATG101	1	0	0	1	0	0	0	1	0	0	0	0	0	0	0	0	0	0	0	0	0	0	0	0	0	0	0	0	1	0	0	1	0	0
ATG12	0	0	0	0	0	1	0	0	0	0	0	0	0	0	0	-1	1	0	0	1	0	-1	0	1	0	0	0	1	0	1	-1	1	0	0
ATG13	0	0	0	0	0	0	0	0	0	1	0	0	0	0	1	0	0	0	0	1	0	0	0	0	0	0	0	0	1	0	1	0	0	1
ATG14	0	0	0	0	0	0	0	0	0	0	0	0	0	0	-1	0	-1	0	0	0	0	-1	0	0	0	-1	1	0	0	0	-1	0	-1	-1
ATG16L1	-1	0	0	0	0	0	0	0	0	0	0	0	0	0	0	0	0	0	0	0	0	0	0	0	0	0	0	0	0	0	1	0	0	0
ATG16L2	1	0	0	0	0	0	0	1	1	1	0	0	0	0	1	1	0	0	0	1	0	0	0	0	0	0	0	0	1	0	1	0	1	1
ATG2A	0	0	0	0	0	0	0	1	0	1	0	0	0	0	1	1	0	0	0	1	0	0	0	0	0	0	0	0	1	0	1	0	0	1
ATG2B	0	0	0	0	0	0	0	0	0	0	0	0	0	0	-1	-1	-1	0	0	0	0	-1	0	0	0	-1	1	1	0	1	-1	0	-1	-1
ATG3	0	0	0	0	0	1	1	1	0	0	0	0	0	0	1	1	0	0	0	0	0	1	0	1	0	0	0	0	0	0	1	0	0	1
ATG4B	-1	0	0	0	0	0	0	0	0	0	0	0	0	0	0	0	0	0	0	0	0	0	0	0	0	0	-1	0	0	0	1	0	0	0
ATG4C	-1	0	0	0	0	0	0	0	0	0	-1	0	0	0	0	0	0	0	0	-1	0	-1	0	-1	0	-1	0	0	0	-1	-1	0	0	0
ATG4D	-1	0	0	0	0	0	0	0	0	0	0	0	0	0	-1	0	0	0	0	0	0	0	0	-1	0	-1	0	1	0	-1	0	0	-1	-1
ATG5	0	-1	0	0	0	-1	0	-1	0	-1	0	0	0	0	-1	0	0	0	0	0	0	0	0	-1	0	-1	0	-1	0	-1	0	0	-1	0
ATG7	-1	0	0	0	0	-1	0	0	0	0	0	0	0	0	-1	-1	0	0	0	0	0	0	0	-1	0	0	0	0	0	-1	0	0	-1	-1
ATG9A	1	0	0	0	0	0	0	0	0	0	0	0	0	0	0	0	0	0	0	0	0	0	0	0	0	0	0	0	0	0	1	0	0	0
ATG9B	0	1	0	0	0	0	1	1	0	0	1	1	0	0	1	1	0	0	1	0	1	0	1	1	0	0	1	0	1	0	1	1	0	1
ATIC	1	0	0	0	0	0	0	0	0	0	0	0	0	0	0	0	0	0	0	0	0	0	0	0	0	0	0	0	0	0	1	0	0	0
ATL1	0	0	0	0	0	0	0	0	0	0	0	0	0	0	-1	0	-1	0	0	0	0	-1	0	0	0	-1	1	0	0	0	-1	0	-1	-1
ATL2	0	0	0	0	0	0	1	0	1	1	0	0	0	0	0	0	0	0	0	0	0	0	0	0	0	0	0	1	0	0	1	0	0	0
ATL3	0	0	0	0	0	0	0	1	0	1	0	0	0	0	1	1	0	0	0	1	0	0	0	0	0	0	0	0	1	0	1	0	0	1
ATM	1	0	0	0	0	0	0	1	1	1	0	0	0	0	1	1	0	0	0	1	0	0	0	0	0	0	0	0	1	1	1	0	0	1
ATMIN	0	0	0	0	0	0	0	0	0	0	-1	0	1	0	0	-1	-1	0	0	0	0	0	-1	-1	0	0	0	0	1	0	-1	0	0	0
ATN1	1	0	0	1	0	0	1	1	0	1	-1	0	0	0	0	1	0	0	0	1	0	0	0	0	1	-1	0	1	1	0	0	0	0	0
ATOH1	-1	0	0	0	0	0	0	0	0	-1	-1	0	0	0	0	-1	0	0	0	0	0	-1	-1	-1	-1	-1	0	-1	0	0	-1	0	0	1
ATOH7	1	0	0	0	0	0	0	1	0	0	0	0	0	0	0	0	0	0	0	0	0	0	0	0	0	-1	1	0	1	0	-1	0	0	0
ATOH8	1	0	0	0	0	0	1	0	0	1	0	0	0	0	0	1	0	0	0	0	0	0	0	0	0	0	0	1	0	0	1	0	0	0
ATOX1	1	0	0	0	0	0	0	0	0	0	0	0	0	0	0	1	1	0	0	1	0	0	0	1	0	0	0	1	0	1	-1	1	0	0
ATP10A	0	0	0	0	0	1	0	1	0	0	0	0	0	0	1	0	0	0	0	1	1	0	0	-1	-1	0	0	-1	0	0	-1	0	0	1
ATP10B	1	0	0	0	0	0	0	0	0	0	0	0	0	0	0	1	1	0	0	1	0	0	0	1	0	0	0	1	0	1	-1	1	0	0
ATP10D	-1	0	0	0	0	0	0	0	0	-1	0	0	0	0	0	-1	0	0	0	0	0	-1	0	0	0	-1	0	-1	0	0	-1	0	-1	1
ATP11A	0	0	0	1	0	1	1	1	1	0	0	1	0	0	1	0	1	0	0	1	0	1	0	0	1	1	0	0	1	-1	1	0	0	1
ATP11AUN	0	0	0	1	0	1	1	1	1	0	0	1	0	0	1	0	1	0	0	1	0	1	0	0	1	1	0	0	1	-1	1	0	0	1
ATP11B	1	0	0	0	0	1	1	1	0	0	0	0	0	0	0	1	0	0	0	0	0	1	0	1	1	0	0	0	0	0	1	0	0	0
ATP12A	0	0	0	1	0	1	1	1	0	0	0	1	0	0	1	0	1	0	0	1	0	1	0	1	1	1	0	0	-1	-1	1	0	0	0
ATP13A1	-1	0	0	0	0	0	0	0	0	0	0	0	0	0	-1	0	0	0	0	0	0	0	0	-1	0	-1	0	1	0	-1	0	0	-1	-1
ATP13A2	-1	0	0	-1	0	0	0	0	0	0	-1	0	0	0	0	0	0	0	0	-1	0	-1	0	-1	0	-1	0	0	0	0	-1	0	0	0
ATP13A3	1	0	0	0	0	1	1	1	0	0	1	0	0	0	0	1	0	0	0	-1	0	1	0	1	1	0	0	0	1	0	1	0	0	0
ATP13A4	1	0	0	0	0	1	1	1	0	0	1	0	0	0	0	1	0	0	0	-1	0	1	0	1	1	0	0	0	1	0	1	0	0	0
ATP13A5	1	0	0	0	0	1	1	1	0	0	1	0	0	0	0	1	0	0	0	-1	0	1	0	1	1	0	0	0	1	0	1	0	0	0
ATP1A1	-1	0	0	0	0	-1	1	0	0	0	0	0	0	0	0	0	0	0	0	0	0	-1	0	-1	0	0	0	0	0	-1	1	0	0	0
ATP1A1-AS1	-1	0	0	0	0	-1	1	0	0	0	0	0	0	0	0	0	0	0	0	0	0	-1	0	-1	0	0	0	0	0	-1	1	0	0	0
ATP1A2	0	0	0	1	0	1	1	1	0	0	0	0	0	0	0	0	0	0	0	0	0	0	0	-1	0	1	0	0	0	0	0	0	0	0
ATP1A3	-1	0	0	0	0	0	0	0	0	0	0	0	0	0	1	0	0	0	0	0	0	0	0	-1	0	-1	0	1	0	0	1	0	0	1
ATP1A4	0	0	0	1	0	1	1	1	0	0	0	0	0	0	0	0	0	0	0	0	0	0	0	-1	0	1	0	0	0	0	0	0	0	0
ATP1B1	0	0	0	0	0	1	0	1	0	0	0	0	0	0	0	0	0	0	0	0	0	0	0	-1	0	1	0	0	0	0	0	0	0	0
ATP1B2	-1	-1	0	0	0	0	0	0	0	-1	-1	0	0	0	-1	0	-1	0	0	-1	0	-1	0	-1	-1	-1	0	0	1	-1	0	0	-1	-1
ATP1B3	0	0	0	0	0	1	1	1	0	0	0	0	0	0	0	1	0	0	0	0	0	1	0	1	0	0	0	0	0	0	1	0	0	0
ATP23	0	0	0	1	0	0	0	1	0	0	0	0	0	0	0	0	0	0	0	0	0	0	0	0	0	0	0	0	0	0	0	1	0	0
ATP2A1	-1	0	0	0	0	0	1	0	0	0	0	0	0	0	0	-1	0	0	0	0	0	0	0	0	0	0	0	0	0	0	-1	0	-1	0
ATP2A1-AS1	-1	0	0	0	0	0	1	0	0	0	0	0	0	0	0	-1	0	0	0	0	0	0	0	0	0	0	0	0	0	0	-1	0	-1	0
ATP2A2	0	0	0	1	0	0	0	1	0	0	0	0	0	0	0	0	0	1	0	0	0	0	0	0	0	-1	0	0	0	0	0	1	0	0
ATP2A3	-1	-1	0	0	0	0	0	0	0	-1	-1	0	0	0	-1	0	-1	0	0	-1	0	-1	0	-1	-1	-1	0	0	1	-1	0	0	-1	-1
ATP2B1	0	0	0	1	0	0	0	-1	0	0	0	0	0	0	0	0	0	1	0	0	0	0	0	0	0	-1	0	0	0	0	0	1	0	0
ATP2B2	-1	0	0	0	0	-1	0	0	0	0	0	0	0	0	-1	-1	0	0	0	0	0	0	0	-1	0	0	0	0	0	-1	0	0	0	-1
ATP2B4	0	0	0	1	0	1	0	1	0	0	0	0	0	0	0	0	0	0	0	0	0	-1	0	-1	0	1	0	0	0	0	0	0	0	0
ATP2C1	0	0	0	0	0	1	1	1	0	0	0	0	0	0	0	1	0	0	0	0	0	1	0	1	0	0	0	0	0	0	1	0	0	0
ATP2C2	0	0	0	0	0	0	0	0	0	0	-1	0	1	0	0	-1	-1	0	0	0	0	0	0	-1	0	0	0	0	0	0	-1	0	0	0
ATP4A	0	0	0	0	0	0	0	0	0	0	0	0	0	0	1	-1	0	0	0	0	0	0	0	-1	0	-1	0	1	0	0	1	0	1	1
ATP4B	0	0	0	1	0	-1	-1	1	1	0	0	1	0	0	1	0	1	0	0	1	0	1	0	0	1	1	0	0	1	-1	1	0	0	1
ATP5A1	-1	-1	0	0	-1	-1	0	0	0	-1	-1	0	0	0	-1	-1	-1	-1	0	-1	0	0	0	-1	0	-1	0	-1	-1	-1	-1	0	-1	-1
ATP5B	0	0	0	1	0	0	0	1	0	0	0	0	0	0	0	0	0	0	0	0	0	0	0	0	0	0	0	0	1	0	0	1	0	0
ATP5C1	0	0	1	0	0	0	1	1	0	0	-1	0	0	0	0	0	0	0	0	0	0	0	1	-1	0	-1	0	0	0	0	-1	0	0	0
ATP5D	-1	0	0	0	0	-1	1	0	0	0	0	0	0	0	-1	0	0	0	0	0	0	0	0	-1	0	-1	0	-1	0	-1	0	0	-1	-1
ATP5E	1	0	0	0	0	1	0	1	0	1	1	0	0	0	1	1	0	1	0	1	0	1	1	1	1	1	0	1	1	1	1	0	1	1
ATP5EP2	0	0	0	1	0	1	1	1	0	0	0	1	0	0	1	0	1	0	0	1	0	1	0	1	1	1	0	0	-1	-1	1	0	0	1
ATP5F1	-1	0	0	0	0	-1	1	0	0	0	0	0	0	0	0	0	0	0	0	0	0	-1	0	-1	0	0	0	0	0	-1	-1	0	0	0
ATP5G1	1	0	0	0	0	1	0	1	0	1	0	0	1	0	0	0	1	0	0	0	0	1	0	0	0	-1	0	0	0	0	0	0	0	0
ATP5G2	0	0	0	1	0	0	0	1	0	0	0	0	0	0	0	0	0	0	0	0	0	0	0	0	0	0	0	0	1	0	0	1	0	0
ATP5G3	1	0	0	0	0	0	0	0	0	0	0	0	0	0	0	1	0	0	0	0	0	0	0	0	0	0	0	0	0	0	1	0	0	0
ATP5H	0	-1	0	0	0	1	0	1	0	1	-1	0	1	0	0	0	1	0	0	0	0	1	0	0	0	-1	0	0	1	1	0	0	0	0
ATP5I	-1	0	0	0	0	0	0	0	0	-1	0	0	0	0	0	-1	0	0	0	0	0	-1	0	0	0	-1	0	-1	0	0	-1	0	-1	1
ATP5J	0	0	0	0	0	0	0	0	0	0	-1	0	0	0	-1	-1	-1	-1	0	-1	0	0	0	0	0	0	0	1	0	0	-1	0	0	-1
ATP5J2	0	1	0	0	0	0	1	1	0	0	1	1	0	0	0	0	0	0	1	0	1	0	1	0	0	0	1	1	1	0	1	1	0	0
ATP5J2-PTCD1	0	1	0	0	0	0	1	1	0	0	1	1	0	0	0	0	0	0	1	0	1	0	1	0	0	0	1	1	1	0	1	1	0	0
ATP5L	1	0	0	0	0	0	0	1	1	1	0	0	0	0	1	1	0	0	0	1	0	0	0	0	0	0	0	0	0	1	1	0	0	1
ATP5L2	-1	-1	0	0	0	0	0	-1	0	-1	-1	0	0	0	-1	0	-1	0	0	-1	0	0	0	-1	-1	-1	0	0	0	-1	-1	0	-1	-1
ATP5O	0	0	0	0	0	0	0	0	0	0	0	0	0	0	-1	0	-1	-1	1	-1	0	0	0	0	0	0	0	1	0	0	-1	0	0	-1
ATP5S	0	0	0	0	0	0	0	0	0	0	0	0	0	0	-1	0	-1	0	0	0	0	-1	0	0	0	-1	1	0	0	0	-1	0	-1	-1
ATP5SL	0	0	0	0	0	0	0	0	0	0	0	0	0	0	1	0	0	0	0	0	0	0	0	-1	0	-1	0	1	0	0	1	0	-1	1
ATP6AP1L	0	0	0	0	0	1	0	1	0	0	0	0	0	0	0	0	1	0	0	-1	0	0	0	1	0	0	0	0	1	1	-1	1	0	0
ATP6V0A1	0	0	0	0	0	1	0	1	0	1	0	0	0	0	0	0	1	0	0	0	0	1	0	0	0	-1	0	0	0	0	0	0	0	0
ATP6V0A2	0	0	0	1	0	1	0	1	0	0	1	0	0	0	0	0	0	1	0	1	0	0	0	0	0	-1	0	0	0	0	0	1	0	0
ATP6V0A4	0	1	0	0	1	0	1	1	0	0	1	1	0	0	0	1	0	0	1	0	1	0	1	1	0	0	1	0	1	0	1	1	0	0
ATP6V0B	-1	0	0	0	0	0	0	0	0	0	0	0	0	0	0	0	0	0	0	-1	0	-1	0	-1	0	-1	0	0	0	0	-1	0	0	0
ATP6V0C	-1	0	-1	0	0	0	0	0	0	0	0	0	0	0	0	-1	0	0	0	0	0	0	0	0	0	0	0	0	0	0	-1	0	-1	0
ATP6V0CP3	0	-1	0	0	0	1	0	1	0	0	0	0	0	0	0	0	-1	0	0	-1	0	0	0	-1	0	-1	0	-1	0	0	0	0	0	0
ATP6V0D1	0	0	0	0	0	0	1	0	0	0	0	0	0	0	0	0	-1	0	0	0	0	0	0	-1	0	0	0	0	1	0	-1	0	0	0
ATP6V0D2	-1	0	0	0	0	0	0	0	0	0	1	0	1	0	1	-1	0	0	0	-1	0	0	1	0	1	1	0	0	0	0	0	0	1	0
ATP6V0E1	1	0	0	0	0	1	0	0	0	0	0	0	0	0	0	1	1	0	0	0	0	0	0	1	0	0	0	1	0	1	-1	1	0	0
ATP6V0E2	0	1	0	0	0	0	1	1	0	0	1	1	0	0	1	1	0	0	1	0	1	0	1	1	0	0	1	0	1	0	1	1	0	1
ATP6V0E2-AS1	0	1	0	0	0	0	1	1	0	0	1	1	0	0	1	1	0	0	1	0	1	0	1	1	0	0	1	0	1	0	1	1	0	1
ATP6V1A	0	0	0	0	0	1	1	1	0	0	0	0	0	0	1	1	0	0	0	0	0	1	0	1	0	0	0	0	0	0	1	0	0	1
ATP6V1B1	1	0	0	0	0	0	0	0	1	1	0	0	0	0	0	0	0	0	0	0	0	0	0	0	0	0	0	1	0	0	1	0	0	0
ATP6V1B2	-1	0	0	0	0	-1	0	0	0	0	-1	0	0	0	-1	0	-1	0	0	0	0	0	0	-1	-1	-1	0	0	0	-1	0	0	-1	-1
ATP6V1C1	-1	0	0	0	1	1	0	0	0	0	1	0	1	0	1	0	0	1	0	-1	0	0	1	0	1	1	0	0	0	0	0	0	1	0
ATP6V1C2	0	0	0	0	0	0	1	0	1	1	0	0	0	0	0	0	0	0	0	0	0	0	0	0	0	0	0	1	-1	0	1	0	0	0
ATP6V1D	0	0	0	0	0	0	0	0	0	0	0	0	0	0	-1	0	-1	0	0	0	0	-1	0	0	0	-1	1	1	0	0	-1	0	-1	-1
ATP6V1E1	-1	1	0	0	0	0	0	1	0	-1	-1	0	0	0	-1	1	0	0	0	-1	0	0	0	-1	-1	-1	0	0	0	-1	-1	0	0	-1
ATP6V1E2	0	0	0	0	0	0	1	0	1	1	0	0	0	0	0	0	0	0	0	0	0	0	0	0	0	0	0	1	0	0	1	0	0	0
ATP6V1F	0	1	0	0	0	0	1	1	0	0	1	1	0	0	0	0	0	0	1	0	1	0	1	1	0	0	1	0	1	0	1	1	0	0
ATP6V1G1	0	0	0	0	0	1	0	0	0	0	0	0	0	0	0	0	1	0	0	0	0	0	1	-1	0	0	0	0	0	0	1	0	0	0
ATP6V1G2	0	-1	1	0	0	0	0	1	0	0	0	0	0	0	0	0	-1	-1	0	-1	0	0	0	-1	0	-1	0	-1	0	0	0	0	0	0
ATP6V1G2-DDX39B	0	-1	1	0	0	0	0	1	0	0	0	0	0	0	0	0	-1	-1	0	-1	0	0	0	-1	0	-1	0	-1	0	0	0	0	0	0
ATP6V1G3	0	0	0	0	0	1	0	1	0	0	0	0	0	0	0	0	0	0	0	0	0	-1	0	-1	0	1	0	0	0	0	0	0	0	0
ATP6V1H	-1	0	0	0	0	0	0	-1	0	0	0	0	0	0	1	-1	0	0	0	-1	0	0	1	0	1	1	0	0	0	1	0	0	0	0
ATP7B	0	0	0	1	0	1	0	0	0	-1	0	1	0	0	1	0	1	0	0	1	0	1	0	0	1	1	0	0	0	-1	1	0	0	1
ATP8A1	-1	0	0	0	0	0	0	0	0	-1	0	0	0	0	0	-1	0	0	0	0	0	-1	0	0	0	-1	0	-1	0	0	-1	0	-1	1
ATP8A2	0	0	0	1	0	1	1	0	0	0	0	1	0	0	1	0	1	0	0	1	0	1	0	1	1	1	0	0	-1	-1	1	0	0	0
ATP8B1	-1	-1	-1	0	-1	-1	0	-1	0	-1	-1	0	0	0	-1	-1	-1	-1	0	-1	0	0	0	-1	-1	-1	0	-1	-1	-1	-1	0	-1	-1
ATP8B2	0	0	0	1	0	1	1	1	0	0	0	0	0	0	0	0	0	0	0	0	0	0	0	-1	0	1	0	0	0	0	0	0	0	0
ATP8B3	-1	0	0	0	0	-1	0	0	0	0	0	0	0	0	-1	0	0	0	0	0	0	0	0	-1	0	-1	0	-1	0	-1	0	0	-1	-1
ATP8B4	0	0	0	0	0	1	1	1	0	0	0	0	0	0	1	1	0	0	0	1	1	0	0	1	-1	0	0	-1	0	0	-1	0	0	1
ATP8B5P	-1	0	0	0	0	0	0	0	0	0	0	0	0	0	0	0	1	0	0	0	0	0	0	0	0	-1	0	0	0	0	-1	0	-1	0
ATP9A	1	0	0	0	0	1	0	1	0	1	1	0	0	0	1	1	0	1	0	1	0	1	1	1	1	1	0	1	1	1	1	0	1	1
ATP9B	-1	-1	-1	0	-1	-1	0	0	0	-1	-1	0	0	0	-1	-1	-1	-1	0	-1	0	0	0	-1	-1	-1	0	-1	-1	-1	-1	0	-1	-1
ATPAF1	-1	0	0	0	0	0	0	0	0	0	0	0	0	0	0	0	0	0	0	-1	0	-1	0	-1	0	-1	0	0	0	0	-1	0	0	0
ATPAF2	1	-1	0	0	0	0	0	-1	0	-1	0	0	0	0	-1	0	-1	0	0	-1	0	-1	0	-1	-1	-1	0	0	0	-1	0	0	-1	-1
ATPIF1	-1	0	0	0	0	0	0	0	0	0	-1	0	0	0	0	0	0	0	0	-1	0	-1	0	-1	0	-1	0	0	0	0	-1	0	-1	0
ATR	0	0	0	0	0	1	1	1	0	0	0	0	0	0	0	1	0	0	0	0	0	1	0	1	0	0	0	0	0	0	1	0	0	0
ATRAID	0	0	0	0	0	0	1	0	0	1	0	0	0	0	0	0	0	0	0	0	0	0	0	0	0	0	0	1	0	0	1	0	0	0
ATRIP	-1	0	0	0	0	-1	0	0	0	0	0	0	0	0	-1	0	0	0	0	0	0	0	0	-1	0	0	0	0	0	-1	0	0	0	-1
ATRN	1	0	0	0	0	1	0	0	0	1	-1	0	0	0	0	1	0	0	0	1	0	1	1	-1	1	1	0	1	1	-1	0	0	1	1
ATRNL1	0	0	0	0	0	0	0	1	0	0	0	0	1	0	0	0	0	0	0	0	0	0	0	0	0	-1	0	0	0	0	-1	0	0	0
ATXN1	0	-1	-1	0	0	0	0	1	0	0	-1	0	0	0	0	0	-1	-1	0	-1	0	0	0	-1	0	-1	0	-1	0	0	0	0	0	0
ATXN10	-1	1	0	0	0	0	1	-1	0	-1	-1	0	0	0	-1	0	-1	0	0	-1	0	0	0	-1	-1	-1	0	0	0	-1	-1	0	-1	-1
ATXN1L	0	0	0	0	0	0	1	0	0	0	-1	0	0	0	0	0	-1	0	0	0	0	0	0	-1	0	0	0	0	1	0	-1	0	0	0
ATXN2	0	0	0	1	0	0	0	1	0	0	0	0	0	0	0	0	0	1	0	0	0	0	0	0	0	-1	0	0	0	0	0	1	0	0
ATXN2L	-1	0	0	0	0	0	1	0	0	0	0	0	0	0	0	-1	0	0	0	0	0	0	0	0	0	0	0	0	0	0	-1	0	-1	0
ATXN3	0	0	0	0	0	0	0	0	0	0	0	0	0	0	-1	-1	-1	0	0	0	0	-1	0	0	0	-1	1	1	0	1	-1	0	-1	-1
ATXN7	0	0	0	0	0	-1	0	0	-1	0	0	0	0	0	-1	0	0	0	0	0	0	0	0	-1	0	0	0	0	0	-1	0	0	0	-1
ATXN7L1	0	1	0	0	0	0	1	1	0	0	1	1	0	0	0	0	0	0	1	0	1	0	1	0	0	0	1	1	1	0	1	1	0	0
ATXN7L2	-1	0	0	0	0	-1	1	0	0	0	0	0	0	0	0	0	0	0	0	0	0	-1	0	-1	0	0	0	0	0	-1	-1	0	0	0
ATXN7L3	0	0	0	0	0	1	0	1	0	1	0	0	0	0	0	0	1	0	0	0	0	1	0	0	0	-1	0	0	0	0	0	0	0	0
ATXN7L3B	0	0	0	1	0	0	0	1	0	0	0	0	0	0	0	0	0	0	0	0	0	0	0	0	0	-1	0	0	0	0	0	1	0	0
ATXN8OS	0	0	0	1	0	1	0	1	0	0	0	1	0	0	0	0	1	0	0	1	0	1	0	0	1	1	0	0	1	-1	1	0	0	1
AUH	-1	0	0	0	0	0	-1	0	0	0	0	0	0	0	0	-1	1	0	0	0	0	0	1	1	0	0	0	0	0	0	1	0	0	0
AUNIP	-1	0	0	0	0	0	0	0	0	0	-1	0	0	0	0	0	0	0	0	-1	0	-1	0	-1	0	-1	0	0	0	0	-1	0	0	0
AUP1	1	0	0	0	0	0	0	0	0	1	0	0	0	0	0	0	0	0	0	0	0	0	0	0	0	0	0	1	0	0	1	0	0	0
AURKA	1	0	0	0	0	1	0	1	0	1	1	0	0	0	1	1	0	1	0	1	0	1	1	1	1	1	0	1	1	1	1	0	1	1
AURKAIP1	-1	0	0	-1	0	0	0	0	0	0	0	0	0	0	0	0	0	0	0	-1	0	-1	0	-1	0	-1	0	0	0	0	-1	0	0	0
AURKAPS1	0	0	0	1	0	1	0	1	0	0	1	0	0	0	0	0	0	0	0	-1	0	-1	0	-1	0	1	0	0	0	0	0	0	0	0
AURKB	-1	-1	0	0	0	0	0	0	0	-1	-1	0	0	0	-1	0	-1	0	0	-1	0	-1	0	-1	-1	-1	0	0	1	-1	0	0	-1	-1
AURKC	-1	0	0	0	0	0	0	0	0	0	0	-1	0	0	1	1	0	0	0	0	0	0	0	-1	0	-1	0	1	0	0	-1	0	0	1
AUTS2	0	1	0	0	0	0	1	1	0	0	1	1	0	0	0	0	0	0	1	0	1	0	0	0	0	0	1	1	1	0	1	0	0	0
AVEN	0	0	0	0	0	1	0	1	0	0	0	0	0	0	1	1	0	0	0	1	1	0	0	-1	-1	0	0	-1	0	0	-1	0	0	1
AVIL	0	0	0	1	0	0	0	1	0	0	0	0	0	0	0	0	0	0	0	0	0	0	0	0	0	0	0	0	0	0	0	1	0	0
AVL9	0	1	0	0	0	0	0	1	0	0	1	1	0	0	0	1	1	0	1	0	1	0	0	1	0	1	1	1	1	0	1	1	1	0
AVP	1	0	0	0	0	1	0	0	0	1	-1	0	0	0	0	1	0	0	0	1	0	1	1	-1	1	1	0	1	1	-1	0	0	1	1
AVPI1	0	0	0	0	0	0	0	1	0	0	0	0	0	0	0	0	0	0	0	0	0	0	0	0	0	-1	0	0	0	0	-1	0	0	0
AVPR1A	0	0	0	1	0	0	0	-1	0	0	0	0	0	0	0	0	0	0	0	0	0	0	0	0	0	-1	0	0	0	0	0	1	0	0
AVPR1B	0	0	0	1	0	1	0	1	0	0	1	0	0	0	0	0	0	0	0	0	0	-1	0	-1	0	1	0	0	0	0	0	0	0	0
AXDND1	0	0	0	0	0	1	0	1	0	0	0	0	0	0	0	-1	0	0	0	0	0	0	0	-1	0	1	0	0	0	0	0	0	0	0
AXIN1	0	0	-1	0	0	0	0	0	0	0	0	0	-1	0	0	-1	0	0	0	0	0	0	0	0	0	0	0	0	0	0	-1	0	-1	0
AXIN2	0	0	0	0	0	1	0	1	0	1	-1	0	1	0	1	0	1	0	0	0	0	1	0	0	0	-1	0	0	1	0	0	0	0	1
AXL	0	0	0	0	0	0	0	0	0	0	0	0	0	0	1	0	0	0	0	0	0	0	0	-1	0	-1	0	1	0	0	1	0	-1	1
AZGP1	0	1	0	0	0	0	1	1	0	0	1	1	0	0	0	0	0	0	1	0	1	0	1	0	0	0	1	1	1	0	1	1	0	0
AZGP1P1	0	1	0	0	0	0	1	1	0	0	1	1	0	0	0	0	0	0	1	0	1	0	1	0	0	0	1	1	1	0	1	1	0	0
AZI2	-1	0	0	0	0	-1	0	0	0	0	0	0	0	0	-1	-1	0	0	0	0	0	0	0	-1	0	0	0	0	0	-1	0	0	0	-1
AZIN1	-1	0	0	0	1	1	0	0	0	0	1	0	1	0	1	0	0	1	0	-1	0	0	1	0	1	1	0	0	0	0	0	0	1	0
AZIN2	-1	0	0	0	0	0	0	0	0	0	-1	0	0	0	0	0	0	0	0	-1	0	-1	0	-1	0	-1	0	0	0	0	-1	0	0	0
AZU1	-1	0	0	0	0	-1	1	0	0	0	0	0	0	0	-1	0	0	0	0	0	0	0	0	-1	0	-1	0	-1	0	-1	0	0	-1	-1
B2M	0	0	0	0	0	1	1	-1	0	0	0	-1	0	0	1	1	0	0	-1	1	1	0	0	-1	-1	0	0	-1	0	0	-1	0	0	1
B3GALNT1	1	0	0	0	0	1	1	1	0	0	0	0	0	0	0	1	0	0	0	0	0	1	0	1	0	0	0	0	0	0	1	0	0	0
B3GALNT2	0	0	0	1	0	1	0	1	0	0	1	0	0	0	0	0	0	0	0	-1	0	-1	0	-1	0	1	0	0	0	0	0	0	0	0
B3GALT1	1	0	0	0	0	0	0	0	0	0	0	0	0	0	0	1	0	0	0	0	0	0	0	0	0	0	0	0	0	0	1	0	0	0
B3GALT2	0	0	0	0	0	1	0	1	0	0	0	0	1	0	0	-1	0	0	0	0	0	-1	0	-1	-1	1	0	0	0	0	0	0	0	0
B3GALT4	0	-1	0	0	0	-1	0	1	0	0	0	0	0	0	0	0	-1	-1	0	-1	0	0	0	-1	0	-1	0	-1	0	-1	0	0	0	0
B3GALT5	0	0	0	0	0	0	0	0	0	0	0	0	0	0	-1	0	-1	0	1	-1	0	-1	0	0	0	0	0	1	0	0	-1	0	0	-1
B3GALT5-AS1	0	0	0	0	0	0	0	0	0	0	0	0	0	0	-1	0	-1	0	1	-1	0	-1	0	0	0	0	0	1	0	0	-1	0	0	-1
B3GALT6	-1	0	0	-1	0	0	0	0	0	0	0	0	0	0	0	0	0	0	0	-1	0	-1	0	-1	0	-1	0	0	0	0	-1	0	0	0
B3GAT1	1	0	0	0	0	0	0	1	1	1	0	0	0	0	1	1	0	0	0	1	0	0	0	0	0	0	0	0	0	1	1	0	0	1
B3GAT2	0	-1	0	0	0	-1	0	-1	0	1	-1	0	0	0	0	-1	0	0	0	-1	0	0	0	-1	0	-1	0	-1	0	0	0	0	-1	0
B3GAT3	0	0	0	0	0	0	0	1	0	1	0	0	0	0	1	1	0	0	0	1	0	0	0	0	0	0	0	0	1	0	1	0	0	1
B3GLCT	0	0	0	1	0	1	1	1	0	0	0	1	0	0	1	0	1	0	0	1	0	1	0	1	1	1	0	0	-1	-1	1	0	0	1
B3GNT2	1	0	0	0	0	0	0	0	1	1	0	0	0	0	0	0	0	0	0	0	0	0	0	0	0	0	0	1	0	0	1	0	0	0
B3GNT3	-1	0	0	0	0	0	0	0	0	0	0	0	0	0	-1	0	0	0	0	0	0	0	0	-1	0	-1	0	1	0	-1	0	0	-1	-1
B3GNT4	0	0	0	1	0	1	0	1	0	0	1	0	0	0	0	0	0	1	0	1	0	-1	0	0	0	-1	0	0	0	0	0	1	0	0
B3GNT5	1	0	0	0	0	1	1	1	0	0	0	0	0	0	0	1	0	0	0	0	0	1	0	1	1	0	0	0	0	0	1	0	0	0
B3GNT6	1	0	0	0	0	0	0	1	1	1	0	0	0	0	1	1	0	0	0	1	0	0	0	0	0	0	0	0	1	1	1	0	1	1
B3GNT7	-1	0	0	0	0	0	0	0	0	0	0	0	0	0	0	0	0	0	0	0	0	0	0	0	0	0	0	0	0	0	1	0	0	0
B3GNT8	0	0	0	0	0	0	0	0	0	0	0	0	0	0	1	0	0	0	0	0	0	0	0	-1	0	-1	0	1	0	0	1	0	-1	1
B3GNT9	0	0	0	0	0	0	1	0	0	0	0	0	0	0	0	0	-1	0	0	0	0	0	0	-1	0	0	0	0	1	0	-1	0	0	0
B3GNTL1	0	1	0	0	0	1	0	1	0	1	-1	0	1	0	0	0	1	0	0	0	0	1	0	0	0	-1	0	0	1	1	0	0	0	0
B4GALNT1	0	0	0	1	0	0	0	1	0	0	0	0	0	0	0	0	0	0	0	0	0	0	0	0	0	0	0	0	0	0	0	1	0	0
B4GALNT2	1	0	0	0	0	1	0	1	0	1	0	0	1	0	0	0	1	0	0	0	0	1	0	0	0	-1	0	0	0	0	0	0	0	0
B4GALNT3	1	-1	0	1	0	0	1	1	0	1	-1	0	0	0	0	1	0	0	0	1	0	0	0	0	1	-1	0	1	1	0	0	0	0	0
B4GALNT4	0	0	0	0	0	0	0	0	1	0	0	0	0	0	1	0	0	0	0	1	0	0	0	0	0	0	0	-1	1	-1	1	0	0	1
B4GALT1	-1	0	0	0	0	0	0	0	0	0	0	0	0	0	0	0	1	0	0	0	0	0	0	0	0	-1	0	0	0	0	-1	0	-1	0
B4GALT2	-1	0	0	0	0	0	0	0	0	0	0	0	0	0	0	0	0	0	0	-1	0	-1	0	-1	0	-1	0	0	0	0	-1	0	0	0
B4GALT3	0	0	0	1	0	1	1	1	0	0	0	0	0	0	0	0	0	0	0	0	0	0	0	-1	0	1	0	0	0	0	0	0	0	0
B4GALT4	0	0	0	0	0	1	1	1	0	0	0	0	0	0	1	1	0	0	0	0	0	1	0	1	0	0	0	0	0	0	1	0	0	1
B4GALT5	1	0	0	0	0	1	0	1	0	1	1	0	0	0	1	1	0	1	0	1	0	1	1	1	1	1	0	1	1	1	1	0	1	1
B4GALT6	-1	0	0	0	-1	-1	0	0	0	-1	-1	0	0	0	-1	-1	-1	0	0	-1	0	0	0	-1	-1	-1	0	-1	-1	-1	-1	0	1	-1
B4GALT7	1	0	0	0	0	1	0	0	0	0	0	0	0	0	0	1	1	0	0	0	0	0	0	1	0	0	0	1	0	1	-1	1	0	0
B4GAT1	0	0	0	0	0	0	0	1	0	1	0	0	0	0	1	1	0	0	0	1	0	0	0	0	0	0	0	0	1	0	1	0	0	1
B9D1	1	-1	0	0	0	0	0	0	0	1	0	0	0	0	-1	0	1	0	0	-1	0	-1	0	0	-1	-1	0	0	0	-1	0	0	-1	-1
B9D2	0	0	0	0	0	0	0	0	0	0	0	0	0	0	1	0	0	0	0	0	0	0	0	-1	0	-1	0	1	0	0	1	0	-1	1
BAALC	-1	0	0	0	1	1	0	0	0	0	1	0	1	0	1	0	0	1	0	-1	0	0	1	0	1	1	0	0	0	0	0	0	1	0
BAALC-AS1	-1	0	0	0	1	1	0	0	0	0	1	0	1	0	1	0	0	1	0	-1	0	0	1	0	1	1	0	0	0	0	0	0	1	0
BAALC-AS2	-1	0	0	0	1	1	0	0	0	0	1	0	1	0	1	0	0	1	0	-1	0	0	1	0	1	1	0	0	0	0	0	0	1	0
BAAT	0	0	0	0	0	1	1	0	0	0	0	0	0	0	0	0	1	0	0	0	0	0	1	-1	0	0	0	0	0	0	1	0	0	0
BABAM1	-1	0	0	0	0	0	0	0	0	0	0	0	0	0	-1	0	0	0	0	0	0	0	0	-1	0	-1	0	1	0	-1	0	0	-1	-1
BACE1	1	0	0	0	0	0	0	1	1	1	0	0	0	0	1	1	0	0	0	1	0	0	0	0	0	0	0	0	0	1	1	0	0	1
BACE1-AS	1	0	0	0	0	0	0	1	1	1	0	0	0	0	1	1	0	0	0	1	0	0	0	0	0	0	0	0	0	1	1	0	0	1
BACE2	0	0	0	0	0	0	0	0	0	0	0	0	0	0	-1	0	-1	0	1	-1	0	-1	0	0	0	0	0	1	0	0	-1	0	0	-1
BACH1	0	0	0	0	0	0	0	0	0	0	-1	0	0	0	-1	-1	-1	-1	1	-1	0	0	0	0	0	0	0	1	0	0	-1	0	0	-1
BACH2	0	-1	0	0	0	-1	0	-1	0	-1	0	0	0	0	-1	-1	0	0	0	0	0	0	0	-1	0	-1	0	-1	0	-1	0	0	-1	0
BAD	0	0	0	0	0	0	0	-1	0	1	0	0	0	0	1	1	0	0	0	1	0	0	0	0	0	0	0	0	1	0	1	0	0	1
BAG1	-1	0	0	0	0	0	0	0	0	0	0	0	0	0	0	0	1	0	0	0	0	0	0	0	0	-1	0	0	0	0	-1	0	-1	0
BAG2	0	-1	0	0	0	1	0	1	0	0	0	0	0	0	0	0	-1	0	0	-1	0	0	0	-1	0	-1	0	-1	0	0	0	0	0	0
BAG3	0	0	0	0	0	0	0	1	0	0	0	0	1	0	0	0	0	0	0	0	0	0	0	0	0	-1	0	0	0	0	-1	0	0	0
BAG4	-1	0	0	0	0	-1	0	0	0	0	1	0	0	0	-1	0	0	0	0	0	0	0	0	1	-1	1	0	0	0	1	0	0	-1	-1
BAG5	0	0	0	0	0	-1	0	0	0	0	0	0	0	0	-1	-1	-1	0	0	0	0	-1	0	0	0	-1	1	1	0	1	-1	0	-1	-1
BAG6	0	-1	1	0	0	0	0	1	0	0	0	0	0	0	0	0	-1	-1	0	-1	0	0	0	-1	0	-1	0	-1	0	0	0	0	0	0
BAHCC1	0	1	0	0	0	1	0	1	0	1	-1	0	1	0	0	0	1	0	0	0	0	1	0	0	0	-1	0	0	1	1	0	0	0	0
BAHD1	0	0	0	0	0	1	0	0	0	0	0	0	0	0	1	1	0	0	0	1	1	0	0	-1	-1	0	0	-1	0	0	-1	0	0	1
BAIAP2	0	1	0	0	0	1	0	1	0	1	-1	0	1	0	0	0	1	0	0	0	0	1	0	0	0	-1	0	0	1	1	0	0	0	0
BAIAP2-AS1	0	1	0	0	0	1	0	1	0	1	-1	0	1	0	0	0	1	0	0	0	0	1	0	0	0	-1	0	0	1	1	0	0	0	0
BAIAP2L1	0	1	0	0	0	0	1	1	0	0	1	1	0	0	0	0	0	0	1	0	1	0	1	0	0	0	1	1	1	0	1	1	0	0
BAIAP2L2	-1	-1	0	0	0	0	0	-1	0	-1	-1	0	0	0	-1	0	-1	0	0	-1	0	0	0	-1	-1	-1	0	0	0	-1	-1	0	-1	-1
BAIAP3	0	0	-1	0	0	0	0	0	0	0	0	0	0	0	0	-1	0	0	0	0	0	0	0	0	0	0	0	0	0	0	-1	0	-1	0
BAK1	0	-1	0	0	0	-1	0	1	0	0	0	0	0	0	0	0	-1	-1	0	-1	0	0	0	-1	0	-1	0	-1	0	-1	0	0	0	0
BAMBI	0	0	0	0	0	-1	0	-1	0	0	0	0	0	0	0	0	0	0	0	0	0	0	1	-1	0	-1	0	0	0	0	-1	0	0	0
BANCR	-1	0	0	0	0	0	1	0	0	0	0	0	0	0	0	0	1	0	0	0	0	0	0	-1	0	0	0	0	0	0	1	0	0	0
BANF1	0	0	0	0	0	0	0	1	0	1	0	0	0	0	1	1	0	0	0	1	0	0	0	0	0	0	0	0	1	0	1	0	0	1
BANF2	0	0	0	0	0	1	0	0	0	1	-1	0	0	0	0	1	0	0	0	1	0	1	1	-1	1	1	0	0	0	-1	1	0	1	1
BANK1	-1	0	0	0	0	0	0	0	0	-1	-1	0	0	0	0	-1	0	0	0	0	0	-1	0	-1	-1	-1	0	-1	-1	0	-1	0	0	1
BANP	0	0	0	0	0	0	0	0	0	0	0	0	1	0	0	-1	-1	0	0	0	0	0	0	-1	0	0	0	0	0	0	-1	0	0	0
BAP1	-1	0	0	0	0	-1	0	0	0	0	0	0	0	0	-1	0	0	0	0	0	0	0	0	-1	0	0	0	0	0	-1	0	0	0	-1
BARD1	1	0	0	0	0	0	0	0	0	0	0	0	0	0	0	0	0	0	0	0	0	0	0	0	0	0	0	0	0	0	1	0	0	0
BARHL1	0	0	0	0	0	1	1	0	0	0	0	0	0	0	0	0	1	0	0	0	0	0	1	1	0	0	0	0	0	0	1	0	0	0
BARHL2	-1	0	0	0	0	-1	1	0	0	0	0	0	0	0	0	0	0	0	0	-1	0	-1	0	-1	0	-1	0	0	0	-1	-1	0	0	0
BARX1	-1	0	0	0	0	0	0	0	0	0	0	0	0	0	0	0	1	0	0	0	0	0	1	-1	0	0	0	0	0	0	1	0	0	0
BARX2	1	0	0	0	0	0	0	1	1	1	0	0	0	0	1	1	0	0	0	1	0	0	0	0	0	0	0	0	0	1	1	0	1	1
BASP1	0	0	0	0	0	1	0	1	0	0	0	0	0	0	1	1	1	-1	1	-1	0	0	0	1	0	0	0	1	1	0	0	0	0	1
BASP1P1	0	0	0	1	0	1	1	1	0	0	0	1	0	0	1	0	1	0	0	1	0	1	0	1	1	1	0	0	-1	-1	1	0	0	0
BATF	0	0	0	0	0	0	0	0	0	0	0	0	0	0	-1	0	-1	0	0	0	0	-1	0	0	0	-1	1	1	0	0	-1	0	-1	-1
BATF2	0	0	0	0	0	0	0	1	0	1	0	0	0	0	1	1	0	0	0	1	0	0	0	0	0	0	0	0	1	0	1	0	0	1
BATF3	0	0	0	1	0	1	0	1	0	0	1	0	0	0	0	0	0	0	0	-1	0	-1	0	-1	0	1	0	0	0	0	0	0	0	0
BAX	-1	0	0	0	0	0	0	0	0	0	0	0	0	0	1	0	0	0	0	0	0	0	0	-1	-1	-1	0	1	0	0	-1	0	0	1
BAZ1A	0	0	-1	0	0	0	0	0	0	0	0	0	0	0	-1	0	-1	0	0	0	0	1	0	0	0	-1	1	0	0	0	-1	0	-1	-1
BAZ1B	0	1	0	0	0	0	1	1	0	0	1	1	0	0	0	0	0	0	1	0	1	0	0	0	0	0	1	1	1	0	1	1	0	0
BAZ2A	0	0	0	1	0	0	0	1	0	0	0	0	0	0	0	0	0	0	0	0	0	0	0	0	0	0	0	0	1	0	0	1	0	0
BAZ2B	1	0	0	0	0	0	0	0	0	0	0	0	0	0	0	1	0	0	0	0	0	0	0	0	0	0	0	0	0	0	1	0	0	0
BBC3	-1	0	0	0	0	0	0	0	0	0	0	0	0	0	1	0	0	0	0	0	0	0	0	-1	-1	-1	0	1	0	0	-1	0	1	1
BBIP1	0	0	0	0	0	0	0	1	0	0	0	0	1	0	0	0	0	0	0	0	0	0	0	0	0	-1	0	0	0	0	-1	0	0	0
BBOF1	0	0	0	0	0	0	0	0	0	0	0	0	0	0	-1	0	-1	0	0	0	0	-1	0	0	0	-1	1	1	0	0	-1	0	-1	-1
BBOX1	0	0	0	0	0	0	0	0	0	1	0	0	0	0	1	-1	0	0	0	1	0	0	0	0	0	0	0	0	1	0	1	0	0	1
BBS1	1	0	0	0	0	0	0	1	0	1	0	0	0	0	1	1	0	0	0	1	0	0	0	0	0	0	0	0	1	0	1	0	0	1
BBS10	0	0	0	1	0	0	0	-1	0	0	0	0	0	0	0	0	0	0	0	0	0	0	0	0	0	-1	0	1	0	0	0	1	0	0
BBS12	-1	0	0	0	0	0	0	0	0	-1	-1	0	0	0	0	0	0	0	0	-1	0	-1	0	-1	-1	-1	0	-1	-1	0	-1	0	0	1
BBS2	0	0	0	0	0	0	1	0	0	0	0	0	0	0	0	0	-1	0	0	0	0	0	0	-1	0	0	0	0	1	0	-1	0	0	0
BBS4	0	0	1	0	0	1	1	1	0	0	0	0	0	0	1	1	0	0	0	1	1	0	0	0	-1	1	0	0	0	0	-1	0	0	1
BBS5	1	0	0	0	0	0	0	0	0	0	0	0	0	0	0	1	0	0	0	0	0	0	0	0	0	0	0	0	0	0	1	0	0	0
BBS7	-1	0	0	0	0	0	0	0	0	-1	-1	0	0	0	0	0	0	0	0	-1	0	-1	0	-1	-1	-1	0	-1	-1	0	-1	0	0	1
BBS9	0	1	0	0	0	0	0	1	0	0	1	1	0	0	0	1	1	0	1	0	1	0	0	1	0	1	1	1	1	0	1	1	1	0
BBX	0	0	0	0	0	1	1	1	0	0	0	0	0	0	1	1	0	0	0	0	0	1	0	1	0	0	0	0	0	0	1	0	0	1
BCAM	-1	0	0	0	0	0	0	0	0	0	0	0	0	0	1	0	0	0	0	0	0	0	0	-1	0	-1	0	1	0	0	1	0	0	1
BCAN	0	0	0	1	0	1	1	1	0	0	0	0	0	0	0	0	0	0	0	0	0	0	0	-1	0	1	0	0	0	0	0	0	0	0
BCAP29	0	1	0	0	0	0	1	1	0	0	1	1	0	0	0	0	0	0	1	0	1	0	1	0	0	0	1	1	1	0	1	1	0	0
BCAR1	0	0	0	0	0	0	1	0	0	0	-1	0	0	0	0	0	-1	0	0	0	0	0	0	-1	0	0	0	0	1	0	-1	0	0	0
BCAR3	-1	0	0	0	0	-1	1	0	0	0	0	0	0	0	0	0	0	0	0	-1	0	-1	0	-1	0	-1	0	0	0	-1	-1	0	0	0
BCAR4	-1	0	0	0	0	0	0	0	0	0	0	0	0	0	0	-1	0	0	0	0	0	0	0	0	0	0	0	0	0	0	-1	0	-1	0
BCAS1	1	0	0	0	0	1	0	1	0	1	1	0	0	0	1	1	0	1	0	1	0	1	1	1	1	1	0	1	1	1	1	0	1	1
BCAS2	-1	0	0	0	0	-1	1	0	0	0	0	0	0	0	0	0	0	0	0	0	0	-1	0	-1	0	0	0	0	0	-1	-1	0	0	0
BCAS3	0	0	0	0	0	1	0	1	0	1	-1	0	1	0	0	0	1	0	0	0	0	1	0	0	0	-1	0	0	1	0	0	0	0	0
BCAS4	1	0	0	0	0	1	0	1	0	1	1	0	0	0	1	1	0	1	0	1	0	1	1	1	1	1	0	1	1	1	1	0	1	1
BCAT1	1	0	0	1	0	0	1	1	0	1	0	0	0	0	1	1	0	0	0	1	0	0	0	0	1	0	0	1	1	0	0	1	0	1
BCAT2	-1	0	0	0	0	0	0	0	0	0	0	0	0	0	1	0	0	0	0	0	0	0	0	-1	-1	-1	0	1	0	0	-1	0	0	1
BCCIP	0	0	0	0	0	0	0	1	0	0	0	0	1	0	0	0	0	0	0	0	0	0	0	0	0	-1	0	0	0	0	-1	0	0	0
BCDIN3D	1	0	0	1	0	0	0	1	0	0	0	0	0	0	0	0	0	0	0	0	0	0	0	0	0	0	0	0	1	0	0	1	0	0
BCDIN3D-AS1	1	0	0	1	0	0	0	1	0	0	0	0	0	0	0	0	0	0	0	0	0	0	0	0	0	0	0	0	1	0	0	1	0	0
BCHE	1	0	0	0	0	1	1	1	0	0	0	0	0	0	1	1	0	0	0	0	0	1	0	1	0	0	0	0	0	0	1	0	0	1
BCKDHA	0	0	0	0	0	0	0	0	0	0	0	0	0	0	1	0	0	0	0	0	0	0	0	-1	0	-1	0	1	0	0	1	0	-1	1
BCKDHB	0	-1	0	0	0	-1	0	-1	0	1	0	0	0	0	-1	-1	0	0	0	-1	0	0	0	-1	0	-1	0	-1	0	-1	0	0	-1	0
BCKDK	-1	0	0	0	0	0	1	0	0	0	0	0	0	0	0	-1	0	0	0	0	0	0	0	0	0	0	0	0	0	0	-1	0	0	0
BCL10	-1	0	0	0	0	-1	1	0	0	0	0	0	0	0	0	0	0	0	0	-1	0	-1	0	-1	0	-1	0	0	0	-1	-1	0	0	0
BCL11A	1	0	0	0	0	0	0	0	1	1	0	0	0	0	0	0	0	0	0	0	0	0	0	0	0	0	0	1	0	0	1	0	0	0
BCL11B	0	0	0	0	0	0	0	0	0	0	0	0	0	0	-1	-1	-1	0	0	0	0	-1	0	0	0	-1	1	1	0	1	-1	0	-1	-1
BCL2	-1	-1	-1	0	-1	-1	0	0	0	-1	-1	0	0	0	-1	-1	-1	-1	0	-1	0	0	0	-1	-1	-1	0	-1	-1	-1	-1	0	-1	-1
BCL2A1	0	0	1	0	0	1	1	1	0	0	0	0	0	0	1	0	0	0	0	1	1	0	0	0	-1	1	0	0	0	0	0	0	0	1
BCL2L1	1	0	0	0	0	1	0	1	0	1	1	0	0	0	1	1	0	1	0	1	0	1	1	1	1	1	0	1	1	1	1	0	1	1
BCL2L10	0	0	0	0	0	1	1	1	0	0	0	0	0	0	1	1	0	0	0	1	1	0	0	1	-1	0	0	-1	0	0	-1	0	0	1
BCL2L11	1	0	0	0	0	0	1	0	0	0	0	0	0	0	0	1	0	0	0	0	0	0	0	0	0	0	0	1	0	0	1	0	0	0
BCL2L12	-1	0	0	0	0	0	0	0	0	0	0	0	0	0	1	1	0	0	0	0	0	0	0	-1	-1	-1	0	1	0	0	-1	0	0	1
BCL2L13	-1	1	0	0	0	0	0	1	0	-1	-1	0	0	0	-1	1	0	0	0	-1	-1	0	0	-1	-1	-1	0	0	0	-1	-1	0	0	-1
BCL2L14	1	0	0	1	0	0	1	-1	0	1	-1	0	0	0	0	1	0	0	0	1	0	0	0	0	1	-1	0	1	1	0	0	0	0	0
BCL2L15	-1	0	0	0	0	-1	1	0	0	0	0	0	0	0	0	0	0	0	0	0	0	-1	0	-1	0	0	0	0	0	-1	-1	0	0	0
BCL2L2	0	0	-1	0	0	0	0	0	0	0	0	0	0	0	-1	0	-1	0	0	0	0	-1	0	0	0	-1	0	0	0	0	-1	0	-1	-1
BCL2L2-PABPN1	0	0	-1	0	0	0	0	0	0	0	0	0	0	0	-1	0	-1	0	0	0	0	-1	0	0	0	-1	0	0	0	0	-1	0	-1	-1
BCL3	-1	0	0	0	0	0	0	0	0	0	0	0	0	0	1	0	0	0	0	0	0	0	0	-1	0	-1	0	1	0	0	1	0	0	1
BCL6	1	0	0	0	0	1	1	0	0	0	0	0	0	0	0	1	0	0	0	-1	0	1	0	1	1	0	0	0	1	0	1	0	0	0
BCL6B	-1	-1	0	0	0	0	0	-1	0	-1	-1	0	0	0	-1	0	-1	0	0	-1	0	-1	0	-1	-1	-1	0	0	1	-1	0	0	-1	-1
BCL7A	0	0	0	1	0	1	0	1	0	0	1	0	0	0	0	0	0	1	0	1	0	-1	0	0	0	-1	0	0	0	0	0	1	0	0
BCL7B	0	1	0	0	0	0	1	1	0	0	1	1	0	0	0	0	0	0	1	0	1	0	0	0	0	0	1	1	1	0	1	1	0	0
BCL7C	-1	0	0	0	0	0	1	0	0	0	0	0	0	0	0	-1	0	0	0	0	0	0	0	0	0	0	0	0	0	0	-1	0	0	0
BCL9	0	0	0	0	0	1	1	1	0	0	0	0	0	0	0	0	0	0	0	0	0	0	0	-1	0	0	0	0	0	0	0	0	0	0
BCL9L	1	0	0	0	0	0	0	1	1	1	0	0	0	0	1	1	0	0	0	1	0	0	0	0	0	0	0	0	0	1	1	0	0	1
BCLAF1	0	-1	0	0	0	1	0	-1	0	0	1	0	0	0	-1	0	1	0	0	-1	0	0	0	1	0	-1	0	-1	0	0	0	0	-1	0
BCO1	0	0	0	0	0	0	0	0	0	0	-1	0	1	0	0	-1	-1	0	0	0	0	0	-1	-1	0	0	0	0	1	0	-1	0	0	0
BCO2	1	0	0	0	0	0	0	1	1	1	0	0	0	0	1	1	0	0	0	1	0	0	0	0	0	0	0	0	1	1	1	0	0	1
BCR	-1	1	0	0	0	0	0	-1	0	-1	-1	0	0	0	-1	0	0	0	0	-1	0	0	0	-1	-1	-1	0	0	0	-1	-1	0	1	-1
BCRP2	-1	1	0	0	0	0	0	0	0	-1	-1	0	0	0	-1	-1	0	0	0	-1	0	0	0	-1	-1	-1	0	0	0	1	-1	0	1	-1
BCRP3	-1	-1	0	0	0	0	0	-1	0	-1	-1	0	0	0	-1	0	0	0	0	-1	0	0	0	-1	-1	-1	0	0	0	1	-1	0	1	-1
BCS1L	1	0	0	0	0	0	0	0	0	0	0	0	0	0	0	0	0	0	0	0	0	0	0	0	0	0	0	0	0	0	1	0	0	0
BDH1	1	0	0	0	0	1	1	1	0	0	1	0	0	0	0	1	0	0	0	-1	0	1	0	1	1	0	0	0	1	0	1	0	0	0
BDH2	-1	0	0	0	0	0	0	0	0	-1	-1	0	0	0	0	-1	0	0	0	0	0	-1	0	-1	-1	-1	0	-1	-1	0	-1	0	0	1
BDKRB1	0	0	0	0	0	0	0	0	0	0	0	0	0	0	-1	-1	-1	0	0	0	0	-1	0	0	0	-1	1	1	0	1	-1	0	-1	-1
BDKRB2	0	0	0	0	0	0	0	0	0	0	0	0	0	0	-1	-1	-1	0	0	0	0	-1	0	0	0	-1	1	1	0	1	-1	0	-1	-1
BDNF	0	0	0	0	0	0	0	0	0	1	0	0	0	0	1	0	0	0	0	1	0	0	0	0	0	0	0	0	1	0	1	0	0	1
BDNF-AS	0	0	0	0	0	0	0	0	0	1	0	0	0	0	1	0	0	0	0	1	0	0	0	0	0	0	0	0	1	0	1	0	0	1
BDP1	0	0	0	0	0	1	0	0	0	0	0	0	0	0	0	0	1	0	0	-1	0	0	0	1	0	0	0	0	1	0	-1	1	0	0
BEAN1	0	0	0	0	0	0	1	0	0	0	0	0	0	0	0	0	-1	0	0	0	0	0	0	-1	0	0	0	0	1	0	-1	0	0	0
BECN1	0	0	0	0	0	1	0	1	0	1	0	0	0	0	0	0	1	0	0	0	0	1	0	0	0	-1	0	0	0	0	0	0	0	0
BEGAIN	0	0	0	0	0	0	0	0	0	0	0	0	0	0	-1	-1	-1	0	0	0	0	-1	0	0	0	-1	1	1	0	1	-1	0	-1	-1
BEND3	0	-1	0	0	0	-1	0	-1	0	-1	0	0	0	0	-1	0	0	0	0	0	0	0	0	-1	0	-1	0	-1	0	-1	0	0	-1	0
BEND3P3	0	0	0	0	0	0	0	1	0	0	-1	0	0	0	0	0	0	0	0	0	0	0	0	0	0	-1	1	0	1	0	-1	0	0	0
BEND4	-1	0	0	0	0	0	0	0	0	-1	0	0	0	0	0	-1	0	0	0	0	0	-1	0	0	0	-1	0	-1	0	0	-1	0	-1	1
BEND5	-1	0	1	0	-1	0	0	0	0	0	0	0	0	0	0	0	-1	0	0	-1	0	-1	0	-1	0	-1	0	0	0	0	-1	0	0	0
BEND6	0	-1	0	0	0	1	0	1	0	0	0	0	0	0	0	0	-1	0	0	-1	0	0	0	-1	0	-1	0	-1	0	0	0	0	0	0
BEND7	0	0	1	0	0	-1	1	1	0	0	-1	0	0	0	0	0	0	0	0	0	0	0	1	-1	0	-1	0	0	0	0	-1	0	0	0
BEST1	0	0	0	0	0	0	0	1	0	1	0	0	0	0	1	1	0	0	0	1	0	0	0	0	0	0	0	0	1	0	1	0	0	1
BEST2	-1	0	0	0	0	0	0	0	0	0	0	0	0	0	-1	0	0	0	0	0	0	0	0	-1	0	-1	0	1	0	0	0	0	-1	-1
BEST3	0	0	0	1	0	0	0	1	0	0	0	0	0	0	0	0	0	0	0	0	0	0	1	0	0	-1	0	0	0	0	0	1	0	0
BEST4	-1	0	0	0	0	0	0	0	0	0	0	0	0	0	0	0	0	0	0	-1	0	-1	0	-1	0	-1	0	0	0	0	-1	0	0	0
BET1	0	1	0	0	0	0	1	1	0	0	1	1	0	0	0	0	0	0	1	0	1	0	1	0	0	0	1	1	1	0	1	1	0	0
BET1L	0	0	0	0	0	0	0	0	1	0	0	0	0	0	1	0	0	0	0	1	0	0	0	0	0	0	0	-1	1	-1	1	0	0	1
BFAR	-1	0	0	0	0	0	1	0	0	0	0	0	0	0	0	-1	0	0	0	0	0	0	0	0	0	0	0	0	0	0	-1	0	0	0
BFSP1	0	0	0	0	0	1	0	0	0	1	-1	0	0	0	0	1	0	0	0	1	0	1	1	-1	1	1	0	1	1	-1	1	0	1	1
BFSP2	0	0	0	0	0	1	1	1	0	0	0	0	0	0	0	1	0	0	0	0	0	1	0	1	0	0	0	0	0	0	1	0	0	0
BGLAP	0	0	0	1	0	1	1	1	0	0	0	0	0	0	0	0	0	0	0	0	0	0	0	-1	0	1	0	0	0	0	0	0	0	0
BHLHA15	0	1	0	0	0	0	1	1	0	0	1	1	0	0	0	0	0	0	1	0	1	0	1	0	0	0	1	1	1	0	1	1	0	0
BHLHA9	1	-1	0	0	0	0	0	0	0	-1	-1	0	0	0	-1	0	-1	0	0	-1	0	-1	0	-1	-1	-1	0	0	1	-1	0	0	-1	-1
BHLHE22	-1	0	0	0	0	0	0	0	0	0	1	0	0	0	1	-1	0	0	0	-1	0	0	1	0	1	1	0	0	0	0	0	0	1	0
BHLHE23	1	0	0	0	0	1	0	1	0	1	1	0	0	0	1	1	0	1	0	1	0	1	1	1	1	1	0	1	1	1	1	0	1	1
BHLHE40	-1	0	0	0	0	-1	0	0	0	0	0	0	0	0	-1	-1	0	0	0	0	0	0	0	-1	0	0	0	0	0	-1	0	0	0	-1
BHLHE40-AS1	-1	0	0	0	0	-1	0	0	0	0	0	0	0	0	-1	-1	0	0	0	0	0	0	0	-1	0	0	0	0	0	-1	0	0	0	-1
BHLHE41	1	0	0	1	0	0	1	1	0	1	0	0	0	0	1	1	0	0	0	1	0	0	0	0	1	0	0	1	1	0	0	1	0	1
BHMG1	-1	0	0	0	0	0	0	0	0	0	0	0	0	0	1	0	0	0	0	0	0	0	0	-1	0	-1	0	1	0	0	1	0	0	1
BHMT	0	0	0	0	0	1	0	1	0	0	0	0	0	0	0	0	1	0	0	-1	0	0	0	1	0	0	0	0	1	1	-1	1	0	0
BHMT2	0	0	0	0	0	1	0	1	0	0	0	0	0	0	0	0	1	0	0	-1	0	0	0	1	0	0	0	0	1	1	-1	1	0	0
BICC1	1	0	0	0	0	0	0	1	0	0	0	0	0	0	0	0	0	0	0	0	0	0	0	0	0	-1	0	0	1	0	-1	0	0	0
BICD1	1	0	0	1	0	0	1	1	0	1	0	0	0	0	1	1	0	0	0	1	0	0	0	0	1	0	0	1	1	0	0	1	0	1
BICD2	-1	0	0	0	0	0	0	0	0	0	0	0	0	0	0	0	1	0	0	0	0	0	1	1	0	0	0	0	0	0	1	0	0	0
BICDL1	0	0	0	1	0	1	0	1	0	0	1	0	0	0	0	0	0	1	0	0	0	0	0	0	0	-1	0	0	0	0	0	1	0	0
BICDL2	-1	0	-1	0	0	0	0	0	0	0	0	0	0	0	0	-1	0	0	0	0	0	0	0	0	0	0	0	0	0	0	-1	0	-1	0
BID	-1	1	0	0	0	0	0	1	0	-1	-1	0	0	0	-1	1	0	0	0	-1	-1	0	0	-1	-1	-1	0	0	0	-1	-1	0	0	-1
BIK	-1	-1	0	0	0	0	0	-1	0	-1	-1	0	0	0	-1	0	-1	0	0	-1	0	0	0	-1	-1	-1	0	0	0	-1	-1	0	-1	-1
BIN1	1	0	0	0	0	0	1	0	0	0	0	0	0	0	0	1	0	0	0	0	0	0	0	0	0	0	0	0	0	0	1	0	0	0
BIN2	1	0	0	1	0	0	0	1	0	0	0	0	0	0	0	0	0	0	0	0	0	0	0	0	0	0	0	0	1	0	0	1	0	0
BIN3	-1	0	0	0	0	-1	0	0	0	0	-1	0	0	0	-1	0	-1	0	0	0	0	0	0	-1	-1	-1	0	0	0	-1	0	0	-1	-1
BIN3-IT1	-1	0	0	0	0	-1	0	0	0	0	-1	0	0	0	-1	0	-1	0	0	0	0	0	0	-1	-1	-1	0	0	0	-1	0	0	-1	-1
BIRC2	1	0	0	0	0	0	0	1	1	1	0	0	0	0	1	1	0	0	0	1	0	0	0	0	0	0	0	0	1	1	1	0	0	1
BIRC3	1	0	0	0	0	0	0	1	1	1	0	0	0	0	1	1	0	0	0	1	0	0	0	0	0	0	0	0	1	1	1	0	1	1
BIRC5	0	-1	0	0	0	1	0	1	0	1	-1	0	1	0	0	0	1	0	0	0	0	1	0	0	0	-1	0	0	1	1	0	0	0	0
BIRC6	0	0	0	0	0	0	1	0	1	1	0	0	0	0	0	0	0	0	0	0	0	0	0	0	0	0	0	1	0	0	1	0	0	0
BIRC7	1	0	0	0	0	1	0	1	0	1	1	0	0	0	1	1	0	1	0	1	0	1	1	1	1	1	0	1	1	1	1	0	1	1
BIRC8	-1	0	0	0	0	0	0	0	0	0	0	0	0	0	1	1	0	0	0	0	0	0	0	-1	0	-1	0	1	0	0	-1	0	0	1
BIVM	0	0	0	1	0	1	0	1	1	0	0	1	0	0	1	0	1	0	0	1	0	1	0	0	1	1	0	0	1	-1	1	0	0	1
BIVM-ERCC5	0	0	0	1	0	1	0	1	1	0	0	1	0	0	1	0	1	0	0	1	0	1	0	0	1	1	0	0	1	-1	1	0	0	1
BLCAP	1	0	0	0	0	1	-1	1	0	1	1	0	0	0	1	1	0	1	0	1	0	1	1	1	1	1	0	1	1	1	1	0	1	1
BLID	1	0	0	0	0	0	0	1	1	1	0	0	0	0	1	1	0	0	0	1	0	0	0	0	0	0	0	0	0	1	1	0	0	1
BLK	-1	0	0	0	0	-1	0	0	0	0	-1	0	0	0	-1	0	-1	0	0	0	0	0	0	-1	-1	-1	0	0	0	-1	0	0	-1	-1
BLM	0	1	1	0	0	1	-1	1	0	0	0	0	0	0	1	0	0	0	0	1	1	0	0	0	-1	1	0	0	0	0	0	0	0	1
BLMH	0	0	0	0	0	1	0	1	0	1	0	0	0	0	0	0	1	0	0	0	0	1	0	0	0	-1	0	0	0	0	0	0	0	0
BLNK	0	0	0	0	0	0	0	1	0	0	0	0	0	0	0	0	0	0	0	0	0	0	0	0	0	-1	0	0	0	0	-1	0	0	0
BLOC1S1	0	0	0	1	0	0	0	1	0	0	0	0	0	0	0	0	0	0	0	0	0	0	0	0	0	0	0	0	1	0	0	1	0	0
BLOC1S1-RDH5	0	0	0	1	0	0	0	1	0	0	0	0	0	0	0	0	0	0	0	0	0	0	0	0	0	0	0	0	1	0	0	1	0	0
BLOC1S2	0	0	0	0	0	0	0	1	0	0	0	0	1	0	0	0	0	0	0	0	0	0	0	0	0	-1	0	0	0	0	-1	0	0	0
BLOC1S3	-1	0	0	0	0	0	0	0	0	0	0	0	0	0	1	0	0	0	0	0	0	0	0	-1	0	-1	0	1	0	0	1	0	0	1
BLOC1S4	-1	0	0	0	0	0	0	0	0	-1	0	0	0	0	0	-1	0	0	0	0	0	-1	0	0	0	-1	0	-1	0	0	-1	0	-1	1
BLOC1S5	0	-1	-1	0	0	0	0	1	0	0	-1	0	0	0	0	0	-1	-1	0	-1	0	0	0	-1	0	-1	0	-1	0	0	0	0	0	0
BLOC1S5-TXNDC5	0	-1	-1	0	0	0	0	1	0	0	-1	0	0	0	0	0	-1	-1	0	-1	0	0	0	-1	0	-1	0	-1	0	0	0	0	0	0
BLOC1S6	0	0	0	0	0	1	1	1	0	0	0	0	0	0	1	1	0	0	0	1	1	0	0	-1	-1	0	0	-1	0	0	-1	0	0	1
BLVRA	0	1	0	0	0	0	0	1	0	0	1	1	0	0	0	1	0	0	1	0	1	0	0	1	0	1	1	1	1	0	1	0	1	0
BLVRB	0	0	0	0	0	0	0	0	0	0	0	0	0	0	1	0	0	0	0	0	0	0	0	-1	0	-1	0	1	0	0	1	0	1	1
BLZF1	0	0	0	0	0	1	0	1	0	0	0	0	0	0	0	0	0	0	0	0	0	0	0	-1	0	1	0	0	0	0	0	0	0	0
BMF	0	0	0	0	0	1	0	1	0	0	0	0	0	0	1	1	0	0	0	1	1	0	0	-1	-1	0	0	-1	0	0	-1	0	0	1
BMI1	0	0	1	0	0	-1	0	1	0	0	-1	0	0	0	0	0	0	0	0	0	0	0	1	-1	0	-1	0	0	0	0	-1	0	0	0
BMP1	-1	0	0	0	0	-1	0	0	0	0	-1	0	0	0	0	0	-1	0	0	0	0	0	0	-1	-1	-1	0	0	0	-1	0	0	-1	-1
BMP10	1	0	0	0	0	0	0	0	1	1	0	0	0	0	0	0	0	0	0	0	0	0	0	0	0	0	0	1	0	0	1	0	0	0
BMP2	1	0	0	0	0	1	0	0	0	1	-1	0	0	0	0	1	0	0	0	1	0	1	1	-1	1	1	0	1	1	-1	0	0	1	1
BMP2K	-1	0	0	0	0	0	0	-1	0	-1	0	0	0	0	0	0	0	0	0	0	0	-1	0	-1	-1	-1	0	-1	0	0	-1	0	0	1
BMP3	-1	0	0	0	0	0	0	-1	0	-1	0	0	0	0	0	0	0	0	0	0	0	-1	0	-1	-1	-1	0	-1	0	0	-1	0	0	1
BMP4	0	0	0	0	0	0	0	0	0	0	0	0	0	0	-1	0	-1	0	0	0	0	-1	0	0	0	-1	1	0	0	0	-1	0	-1	-1
BMP5	0	-1	0	0	0	1	0	1	0	0	0	0	0	0	0	0	-1	0	0	-1	0	0	0	-1	0	-1	0	-1	0	0	0	0	0	0
BMP6	0	-1	-1	0	0	0	0	1	0	0	-1	0	0	0	0	0	-1	-1	0	-1	0	0	0	-1	0	-1	0	-1	0	0	0	0	0	0
BMP7	1	0	0	0	0	1	0	1	0	1	1	0	0	0	1	1	0	1	0	1	0	1	1	1	1	1	0	1	1	1	1	0	1	1
BMP8A	-1	0	0	0	0	0	0	0	0	0	0	0	0	0	0	0	0	0	0	-1	0	-1	0	-1	0	-1	0	0	0	0	-1	0	0	0
BMP8B	-1	0	0	0	0	0	0	0	0	0	0	0	0	0	0	0	0	0	0	-1	0	-1	0	-1	0	-1	0	0	0	0	-1	0	0	0
BMPER	0	1	0	0	0	0	0	1	0	0	1	1	0	0	0	1	1	0	1	0	1	0	0	1	0	1	1	1	1	0	1	1	1	0
BMPR1A	0	0	0	0	0	0	0	1	0	0	0	0	0	0	0	0	0	0	0	0	0	0	0	0	0	-1	0	0	1	0	-1	0	0	0
BMPR1B	-1	0	0	0	0	0	0	0	0	-1	-1	0	0	0	0	-1	0	0	0	0	0	-1	-1	-1	-1	-1	0	-1	0	0	-1	0	0	1
BMPR2	1	0	0	0	0	0	0	0	0	0	0	0	0	0	0	1	0	0	0	0	0	0	0	0	0	0	0	0	0	0	1	0	0	0
BMS1	0	0	0	0	0	0	0	1	0	0	-1	0	0	0	0	0	0	0	0	0	0	0	0	0	0	-1	0	0	1	0	-1	0	0	0
BMS1P18	-1	1	0	0	0	0	0	-1	0	-1	0	0	0	0	-1	1	0	0	0	-1	0	0	0	-1	-1	-1	0	0	0	1	-1	0	0	-1
BMS1P20	-1	1	0	0	0	0	0	-1	0	-1	-1	0	0	0	-1	0	0	0	0	-1	0	0	0	-1	-1	-1	0	0	0	-1	-1	0	1	-1
BMS1P21	0	0	0	0	0	0	0	1	0	0	-1	0	0	0	0	0	0	0	0	0	0	0	0	0	0	-1	1	0	1	0	-1	0	0	0
BMS1P4	1	0	0	0	0	0	0	1	0	0	0	0	0	0	0	0	0	0	0	0	0	0	0	0	0	-1	1	0	1	0	-1	0	1	0
BMS1P6	0	0	0	0	0	0	0	1	0	0	-1	0	0	0	0	1	0	0	0	0	0	0	1	0	0	0	0	0	1	0	-1	0	0	0
BMT2	0	1	0	0	0	0	1	1	0	0	1	1	0	0	0	0	0	0	1	0	1	0	1	0	0	0	1	0	1	0	1	1	0	0
BNC1	0	0	1	0	0	1	1	1	0	0	0	0	0	0	1	0	0	0	0	1	1	0	0	0	-1	1	0	0	0	0	0	0	0	1
BNC2	-1	0	0	0	0	0	-1	0	0	0	0	0	0	0	0	0	1	0	0	0	0	0	0	-1	0	-1	0	0	0	0	-1	0	-1	0
BNIP1	1	0	0	0	0	1	0	0	0	0	0	0	0	0	0	1	1	0	0	0	0	0	0	1	0	0	0	1	0	1	-1	1	0	0
BNIP2	0	0	1	0	0	1	1	1	0	0	0	0	0	0	1	1	0	0	0	1	1	0	0	-1	-1	0	0	-1	0	0	-1	0	0	1
BNIP3	0	0	0	0	0	0	1	1	0	0	0	0	-1	0	0	0	0	0	0	0	0	0	0	0	0	-1	0	0	0	0	-1	0	0	0
BNIP3L	-1	0	0	0	0	-1	0	0	0	0	-1	0	0	0	-1	0	0	0	0	0	0	0	0	-1	-1	-1	0	0	0	-1	0	0	-1	-1
BOC	0	0	0	0	0	1	1	1	0	0	0	0	0	0	1	1	0	0	0	0	0	1	0	1	0	0	0	0	0	0	1	0	0	1
BOD1	1	0	0	0	0	1	0	0	0	0	0	0	0	0	0	1	1	0	0	0	0	0	0	1	0	0	0	1	0	1	-1	1	0	0
BOD1L1	-1	0	0	0	0	0	0	0	0	-1	0	0	0	0	0	-1	0	0	0	0	0	-1	0	0	0	-1	0	-1	0	0	-1	0	-1	1
BOD1L2	-1	-1	-1	0	-1	-1	0	-1	0	-1	-1	0	1	0	-1	-1	-1	-1	0	-1	0	0	0	-1	-1	-1	0	-1	-1	-1	-1	0	-1	-1
BOK	-1	0	0	0	0	0	0	0	0	0	0	0	0	0	0	0	0	0	0	0	0	0	0	0	0	0	-1	0	0	0	1	0	0	0
BOK-AS1	-1	0	0	0	0	0	0	0	0	0	0	0	0	0	0	0	0	0	0	0	0	0	0	0	0	0	-1	0	0	0	1	0	0	0
BOLA2	-1	0	0	0	0	0	1	0	0	0	0	0	0	0	0	-1	0	0	0	0	0	0	0	0	0	0	0	0	0	0	-1	0	0	0
BOLA3	1	0	0	0	0	0	0	0	0	1	0	0	0	0	0	0	0	0	0	0	0	0	0	0	0	0	0	1	0	0	1	0	0	0
BOLA3-AS1	1	0	0	0	0	0	0	0	0	1	0	0	0	0	0	0	0	0	0	0	0	0	0	0	0	0	0	1	0	0	1	0	0	0
BOLL	1	0	0	0	0	0	0	0	0	0	0	0	0	0	0	1	0	0	0	0	0	0	0	0	0	0	0	0	0	0	1	0	0	0
BOP1	-1	0	0	0	1	0	0	0	0	0	1	0	1	0	1	-1	-1	1	0	0	0	0	1	0	1	1	0	0	0	0	0	0	1	1
BORA	0	0	0	1	0	1	1	1	0	0	0	1	0	0	1	0	1	0	0	1	0	1	0	0	1	1	0	0	1	-1	1	0	0	1
BORCS5	1	0	0	1	0	0	1	1	0	1	-1	0	0	0	0	1	0	0	0	1	0	0	0	0	1	-1	0	1	1	0	0	0	0	0
BORCS6	-1	-1	0	0	0	0	0	0	0	-1	-1	0	0	0	-1	0	-1	0	0	-1	0	-1	0	-1	-1	-1	0	0	1	-1	0	0	-1	-1
BORCS7	0	0	0	0	0	0	0	1	0	0	0	0	1	0	0	0	0	0	0	0	0	0	0	0	0	-1	0	0	0	0	-1	0	0	0
BORCS7-ASMT	0	0	0	0	0	0	0	1	0	0	0	0	1	0	0	0	0	0	0	0	0	0	0	0	0	-1	0	0	0	0	-1	0	0	0
BORCS8	-1	0	0	0	0	0	0	0	0	0	0	0	0	0	-1	0	0	0	0	0	0	0	0	-1	0	-1	0	1	0	-1	0	0	-1	-1
BORCS8-MEF2B	-1	0	0	0	0	0	0	0	0	0	0	0	0	0	-1	0	0	0	0	0	0	0	0	-1	0	-1	0	1	0	-1	0	0	-1	-1
BPESC1	0	0	0	0	0	1	1	1	0	0	0	0	0	0	0	1	0	0	0	0	0	1	0	1	0	0	0	0	0	0	1	0	0	0
BPGM	0	1	0	0	0	0	1	1	0	0	1	1	0	0	0	1	0	0	1	0	1	0	1	1	0	0	1	0	1	0	1	1	0	0
BPHL	0	-1	-1	0	0	0	0	1	-1	0	-1	0	0	0	0	0	-1	-1	0	-1	0	0	0	-1	0	-1	0	-1	0	0	1	0	0	0
BPI	1	0	0	0	0	1	-1	1	0	1	1	0	0	0	1	1	0	1	0	1	0	1	1	1	1	1	0	1	1	1	1	0	1	1
BPIFA1	1	0	0	0	0	1	0	1	0	1	1	0	0	0	1	1	0	1	0	1	0	1	1	1	1	1	0	1	1	1	1	0	1	1
BPIFA2	1	0	0	0	0	1	0	1	0	1	1	0	0	0	1	1	0	1	0	1	0	1	1	1	1	1	0	1	1	1	1	0	1	1
BPIFA3	1	0	0	0	0	1	0	1	0	1	1	0	0	0	1	1	0	1	0	1	0	1	1	1	1	1	0	1	1	1	1	0	1	1
BPIFA4P	1	0	0	0	0	1	0	1	0	1	1	0	0	0	1	1	0	1	0	1	0	1	1	1	1	1	0	1	1	1	1	0	1	1
BPIFB1	1	0	0	0	0	1	0	1	0	1	1	0	0	0	1	1	0	1	0	1	0	1	1	1	1	1	0	1	1	1	1	0	1	1
BPIFB2	1	0	0	0	0	1	0	1	0	1	1	0	0	0	1	1	0	1	0	1	0	1	1	1	1	1	0	1	1	1	1	0	1	1
BPIFB3	1	0	0	0	0	1	0	1	0	1	1	0	0	0	1	1	0	1	0	1	0	1	1	1	1	1	0	1	1	1	1	0	1	1
BPIFB4	1	0	0	0	0	1	0	1	0	1	1	0	0	0	1	1	0	1	0	1	0	1	1	1	1	1	0	1	1	1	1	0	1	1
BPIFB6	1	0	0	0	0	1	0	1	0	1	1	0	0	0	1	1	0	1	0	1	0	1	1	1	1	1	0	1	1	1	1	0	1	1
BPIFC	-1	-1	0	0	0	0	0	-1	0	-1	-1	0	0	0	-1	0	0	0	0	-1	0	0	0	-1	-1	-1	0	0	0	-1	-1	0	-1	-1
BPNT1	0	0	0	1	0	1	0	1	0	0	1	0	0	0	0	0	0	0	0	-1	0	-1	0	-1	0	1	0	0	0	0	0	0	0	0
BPTF	0	0	0	0	0	1	0	1	0	1	-1	0	1	0	1	0	1	0	0	0	0	1	0	0	0	-1	0	0	1	0	0	0	0	1
BRAF	0	1	0	0	0	0	1	1	1	0	1	1	0	0	0	1	0	0	1	0	1	0	1	1	0	0	1	0	1	0	1	1	0	0
BRAP	0	0	0	1	0	0	0	1	0	0	0	0	0	0	0	0	0	1	0	0	0	0	0	0	0	-1	0	0	0	0	0	1	0	0
BRAT1	0	1	1	0	0	0	-1	1	0	0	1	1	0	0	0	1	1	0	1	0	1	0	0	1	0	1	1	1	1	0	1	0	1	0
BRCA1	0	0	0	0	0	1	0	1	0	1	0	0	0	0	0	0	1	0	0	0	0	1	0	0	0	-1	0	0	0	0	0	0	0	0
BRCA2	0	0	0	1	0	1	1	1	0	0	0	1	0	0	1	0	1	0	0	1	0	1	0	1	1	1	0	0	-1	-1	1	0	0	1
BRD1	-1	-1	0	0	0	0	1	-1	0	-1	-1	0	0	0	-1	0	-1	0	0	-1	0	0	0	-1	-1	-1	0	0	0	-1	-1	0	-1	-1
BRD2	0	-1	0	0	0	-1	0	1	0	0	0	0	0	0	0	0	-1	-1	0	-1	0	0	0	-1	0	-1	0	-1	0	-1	0	0	0	0
BRD3	0	0	0	0	0	1	1	0	0	0	0	0	0	0	0	0	1	0	0	0	0	0	1	1	0	0	0	0	0	0	1	0	0	0
BRD4	-1	0	0	0	0	0	0	0	0	0	0	0	0	0	-1	0	0	0	0	0	0	0	0	-1	0	-1	0	1	0	-1	0	0	-1	-1
BRD7	0	0	0	0	0	0	1	0	0	0	0	0	0	0	0	0	0	0	0	0	0	0	0	-1	0	0	0	0	1	0	-1	0	0	0
BRD7P3	0	-1	0	0	0	-1	0	-1	0	0	0	0	0	0	-1	0	0	0	0	0	0	0	0	-1	0	-1	0	-1	0	-1	0	0	-1	0
BRD8	1	0	0	0	0	1	0	0	0	0	0	0	0	0	0	1	1	0	0	1	0	0	0	1	0	0	0	1	0	1	-1	1	0	0
BRD9	0	0	0	0	0	1	0	1	0	0	0	0	0	0	1	1	1	-1	1	-1	0	0	0	1	0	0	0	1	1	0	0	0	0	0
BRDT	-1	0	0	0	0	-1	1	0	0	0	0	0	0	0	0	0	0	0	0	-1	0	-1	0	-1	0	-1	1	0	0	-1	-1	0	0	0
BRE	0	0	0	0	0	0	1	0	0	1	0	0	0	0	0	0	0	0	0	0	0	0	0	0	0	0	0	1	0	0	1	0	0	0
BRE-AS1	0	0	0	0	0	0	1	0	0	1	0	0	0	0	0	0	0	0	0	0	0	0	0	0	0	0	0	1	0	0	1	0	0	0
BREA2	-1	0	0	0	1	0	0	0	0	0	1	0	1	0	1	-1	-1	1	0	0	0	0	1	0	1	1	0	0	0	0	0	0	1	1
BRF1	0	0	0	0	0	-1	0	0	0	0	0	0	0	0	-1	-1	-1	0	0	0	0	-1	0	0	0	-1	1	1	0	1	-1	0	-1	-1
BRF2	-1	0	0	0	0	-1	0	0	0	0	1	0	0	0	-1	0	0	0	0	0	0	0	0	1	-1	1	0	0	0	-1	0	0	-1	-1
BRI3	0	1	0	0	0	0	1	1	0	0	1	1	0	0	0	0	0	0	1	0	1	0	1	0	0	0	1	1	1	0	1	1	0	0
BRI3BP	0	0	0	1	0	1	0	1	0	0	1	0	0	0	0	0	0	1	0	1	0	0	0	0	0	-1	0	0	0	0	0	1	0	0
BRICD5	0	0	-1	0	0	0	0	0	0	0	0	0	0	0	0	-1	0	0	0	0	0	0	0	0	0	0	0	0	0	0	-1	0	-1	0
BRINP1	0	0	0	0	0	1	1	0	0	0	0	0	0	0	0	0	1	0	0	0	0	0	1	-1	0	0	0	0	0	0	1	0	0	0
BRINP2	0	0	0	0	0	1	0	1	0	0	0	0	0	0	0	-1	0	0	0	0	0	0	0	-1	0	1	0	0	0	0	0	0	0	0
BRINP3	0	0	0	0	0	1	0	1	0	0	0	0	0	0	0	-1	0	0	0	0	0	0	0	-1	-1	1	0	0	0	0	0	0	0	0
BRIP1	0	0	0	0	0	1	0	1	0	1	-1	0	1	0	0	0	1	0	0	0	0	1	0	0	0	-1	0	0	1	0	0	0	0	0
BRIX1	0	0	0	0	0	1	0	1	0	0	0	0	0	0	1	1	1	0	1	-1	0	0	0	1	0	0	0	0	1	0	0	0	0	1
BRK1	-1	0	0	0	0	-1	0	0	0	0	0	0	0	0	-1	-1	0	0	0	0	0	0	0	-1	0	0	0	0	0	-1	0	0	0	-1
BRMS1	0	0	0	0	0	0	0	1	0	1	0	0	0	0	1	1	0	0	0	1	0	0	0	0	0	0	0	0	1	0	1	0	0	1
BRMS1L	0	0	-1	0	0	0	0	0	0	0	0	0	0	-1	-1	0	-1	0	0	0	0	1	0	0	0	-1	1	0	0	0	-1	0	-1	-1
BROX	-1	0	0	1	0	1	0	1	0	0	1	0	0	0	0	0	0	0	0	-1	0	-1	0	-1	0	1	0	0	0	0	0	0	0	0
BRPF1	-1	0	0	0	0	-1	0	0	0	0	0	0	0	0	-1	-1	0	0	0	0	0	0	0	-1	0	0	0	0	0	-1	0	0	0	-1
BRPF3	0	-1	0	0	0	-1	0	1	0	0	0	0	0	0	0	0	-1	0	0	-1	0	0	0	-1	0	-1	0	-1	0	-1	0	0	0	0
BRSK1	-1	0	0	0	0	0	0	0	0	0	0	0	0	0	1	1	0	0	0	0	0	0	0	-1	0	-1	0	1	0	0	-1	0	0	1
BRSK2	0	0	0	0	0	0	0	0	1	0	0	0	0	0	1	0	0	0	0	1	0	0	0	0	0	0	0	-1	1	-1	1	0	0	1
BRWD1	0	0	0	0	0	0	0	0	0	0	0	0	0	0	-1	0	-1	0	1	-1	0	-1	0	0	0	0	0	1	0	0	-1	0	0	-1
BRWD1-AS1	0	0	0	0	0	0	0	0	0	0	0	0	0	0	-1	0	-1	0	1	-1	0	-1	0	0	0	0	0	1	0	0	-1	0	0	-1
BSCL2	0	0	0	0	0	0	0	1	0	1	0	0	0	0	1	1	0	0	0	1	0	0	0	0	0	0	0	0	1	0	1	0	0	1
BSDC1	-1	0	0	0	0	0	0	0	0	0	-1	0	0	0	0	0	0	0	0	-1	0	-1	0	-1	0	-1	0	0	0	0	-1	0	0	0
BSG	-1	0	0	0	0	-1	1	0	0	0	0	0	0	0	-1	0	0	0	0	0	0	0	0	-1	0	-1	0	-1	0	-1	0	0	-1	-1
BSN	-1	0	0	0	0	-1	0	0	0	0	0	0	0	0	-1	0	0	0	0	0	0	0	0	-1	0	0	0	0	0	-1	0	0	0	-1
BSN-AS2	-1	0	0	0	0	-1	0	0	0	0	0	0	0	0	-1	0	0	0	0	0	0	0	0	-1	0	0	0	0	0	-1	0	0	0	-1
BSND	-1	0	0	0	0	0	0	0	0	0	0	0	0	0	0	0	0	0	0	-1	0	-1	0	-1	0	-1	0	0	0	-1	-1	0	0	0
BSPH1	-1	0	0	0	0	0	0	0	0	0	0	0	0	0	1	0	0	0	0	0	0	0	0	-1	-1	-1	0	1	0	0	-1	0	0	1
BSPRY	0	0	0	0	0	1	0	0	0	0	0	0	0	0	0	0	1	0	0	0	0	0	1	-1	0	0	0	0	0	0	1	0	0	0
BST1	-1	0	0	0	0	0	0	0	0	-1	0	0	0	0	0	-1	0	0	0	0	0	-1	0	0	0	-1	0	-1	0	0	-1	0	-1	1
BST2	-1	0	0	0	0	0	0	0	0	0	0	0	0	0	-1	0	0	0	0	0	0	0	0	-1	0	-1	0	1	0	-1	0	0	-1	-1
BSX	1	0	0	0	0	0	0	1	1	1	0	0	0	0	1	1	0	0	0	1	0	0	0	0	0	0	0	0	0	1	1	0	0	1
BTAF1	0	0	0	0	0	0	0	1	0	0	0	0	0	0	0	0	0	0	0	0	0	0	0	0	0	-1	0	0	0	0	-1	0	0	0
BTBD1	0	0	1	0	0	1	1	1	0	0	0	0	0	0	1	0	0	0	0	1	1	0	0	1	-1	1	0	0	0	0	0	0	0	1
BTBD10	0	0	0	0	0	0	0	0	0	1	0	0	0	0	1	0	0	0	0	1	0	0	0	0	0	0	0	0	1	-1	1	0	0	1
BTBD11	0	0	0	1	0	0	0	-1	0	0	0	0	0	0	0	0	0	1	0	0	0	0	0	0	0	-1	0	0	0	0	0	1	0	0
BTBD16	0	0	0	0	0	0	0	1	0	0	0	0	1	0	0	0	0	0	0	0	0	0	0	0	0	-1	0	0	0	0	-1	0	0	0
BTBD17	0	-1	0	0	0	1	0	1	0	1	-1	0	1	0	0	0	1	0	0	0	0	1	0	0	0	-1	0	0	1	1	0	0	0	0
BTBD18	0	0	0	0	0	0	0	-1	0	1	0	0	0	0	1	0	0	0	0	1	0	0	0	0	0	0	0	0	1	0	1	0	0	1
BTBD19	-1	0	0	0	0	0	0	0	0	0	0	0	0	0	0	0	0	0	0	-1	0	-1	0	-1	0	-1	0	0	0	0	-1	0	0	0
BTBD2	-1	0	0	0	0	-1	0	0	0	0	0	0	0	0	-1	0	0	0	0	0	0	0	0	-1	0	-1	0	-1	0	-1	0	0	-1	-1
BTBD3	1	0	0	0	0	1	0	0	0	1	-1	0	0	0	0	1	0	0	0	1	0	1	1	-1	1	1	0	1	1	-1	0	0	1	1
BTBD6	0	0	0	0	0	-1	0	0	0	0	0	0	0	0	-1	-1	-1	0	0	0	0	-1	0	0	0	-1	1	1	0	1	-1	0	-1	-1
BTBD7	0	0	0	0	0	0	0	0	0	0	0	0	0	0	-1	-1	-1	0	0	0	0	-1	0	0	0	-1	1	1	0	1	-1	0	-1	-1
BTBD8	-1	0	0	0	0	-1	1	0	0	0	0	0	0	0	0	0	0	0	0	-1	0	-1	0	-1	0	-1	1	0	0	-1	-1	0	0	0
BTBD9	0	-1	0	0	0	1	0	1	0	0	0	0	0	0	0	0	-1	0	0	-1	0	0	0	-1	0	-1	0	-1	0	-1	0	0	0	0
BTC	-1	0	0	0	0	0	0	0	0	-1	0	0	0	0	0	0	0	0	0	0	0	-1	0	-1	-1	-1	0	-1	0	0	-1	0	0	1
BTD	-1	0	0	0	0	-1	0	0	0	0	0	0	0	0	-1	-1	0	0	0	0	0	0	0	-1	0	0	0	0	0	-1	0	0	0	-1
BTF3	0	0	0	0	0	1	0	1	0	0	0	0	0	0	0	0	1	0	0	0	0	0	0	1	0	0	0	0	1	0	-1	1	0	0
BTF3L4	-1	0	0	0	0	0	0	0	0	0	0	0	0	0	0	0	0	0	0	-1	0	-1	0	-1	0	-1	0	0	0	-1	-1	0	0	0
BTF3P11	0	0	0	1	0	1	0	1	0	0	0	1	0	0	0	0	1	0	0	1	0	1	0	0	1	1	0	0	1	-1	1	0	0	1
BTG1	0	0	0	1	0	0	0	-1	0	0	0	0	0	0	0	0	0	1	0	0	0	0	0	0	0	-1	0	0	0	0	0	1	0	0
BTG2	0	0	0	1	0	1	0	1	0	0	0	0	0	0	0	0	0	0	0	0	0	-1	0	-1	0	1	0	0	0	0	0	0	0	0
BTG3	0	0	0	0	0	0	0	0	0	0	0	0	0	0	-1	-1	-1	-1	0	-1	0	1	0	0	0	0	0	1	0	0	-1	0	0	-1
BTG4	1	0	0	0	0	0	0	1	1	1	0	0	0	0	1	1	0	0	0	1	0	0	0	0	0	0	0	0	1	1	1	0	0	1
BTLA	0	0	0	0	0	1	1	1	0	0	0	0	0	0	1	1	0	0	0	0	0	1	0	1	0	0	0	0	0	0	1	0	0	1
BTN1A1	0	-1	1	0	0	0	0	1	0	0	0	0	0	0	0	0	-1	-1	0	-1	0	0	0	-1	0	-1	0	-1	0	0	0	0	0	0
BTN2A1	0	-1	1	0	0	0	0	1	0	0	0	0	0	0	0	0	-1	-1	0	-1	0	0	0	-1	0	-1	0	-1	0	0	0	0	0	0
BTN2A2	0	-1	1	0	0	0	0	1	0	0	0	0	0	0	0	0	-1	-1	0	-1	0	0	0	-1	0	-1	0	-1	0	0	0	0	0	0
BTN2A3P	0	-1	1	0	0	0	0	1	0	0	0	0	0	0	0	0	-1	-1	0	-1	0	0	0	-1	0	-1	0	-1	0	0	0	0	0	0
BTN3A1	0	-1	1	0	0	0	0	1	0	0	0	0	0	0	0	0	-1	-1	0	-1	0	0	0	-1	0	-1	0	-1	0	0	0	0	0	0
BTN3A2	0	-1	1	0	0	0	0	1	0	0	0	0	0	0	0	0	-1	-1	0	-1	0	0	0	-1	0	-1	0	-1	0	0	0	0	0	0
BTN3A3	0	-1	1	0	0	0	0	1	0	0	0	0	0	0	0	0	-1	-1	0	-1	0	0	0	-1	0	-1	0	-1	0	0	0	0	0	0
BTNL2	0	-1	1	0	0	0	0	1	0	0	0	0	0	0	0	0	-1	-1	0	-1	0	0	0	-1	0	-1	0	-1	0	-1	0	0	0	0
BTNL3	1	0	0	0	0	-1	0	0	0	0	0	0	0	0	0	1	1	-1	-1	0	0	0	0	1	0	0	0	-1	0	1	-1	1	0	0
BTNL8	1	0	0	0	0	1	0	0	0	0	0	0	0	0	0	1	1	0	0	0	0	0	0	1	0	0	0	1	0	1	-1	1	0	0
BTNL9	1	0	0	0	0	1	0	0	0	0	0	0	0	0	0	1	1	0	0	0	0	0	0	1	0	0	0	1	0	1	-1	1	0	0
BTRC	0	0	0	0	0	0	0	1	0	0	0	0	1	0	0	0	0	0	0	0	0	0	0	0	0	-1	0	0	0	0	-1	0	0	0
BUB1	1	0	0	0	0	0	1	0	0	0	0	0	0	0	0	1	0	0	0	0	0	0	0	0	0	0	0	1	0	0	1	0	0	0
BUB1B	0	0	0	0	0	1	0	1	0	0	0	0	0	0	1	1	0	0	0	1	1	0	0	-1	-1	0	0	-1	0	0	-1	0	0	1
BUB3	0	0	0	0	0	0	0	1	0	0	0	0	1	0	0	0	0	0	0	0	0	0	0	0	0	-1	0	0	0	0	-1	0	0	0
BUD13	1	0	0	0	0	0	0	1	1	1	0	0	0	0	1	1	0	0	0	1	0	0	0	0	0	0	0	0	0	1	1	0	0	1
BUD31	0	1	0	0	0	0	1	1	0	0	1	1	0	0	0	0	0	0	1	0	1	0	1	0	0	0	1	1	1	0	1	1	0	0
BVES	0	-1	0	0	0	-1	0	-1	0	-1	0	0	0	0	-1	0	0	0	0	0	0	0	0	-1	0	-1	0	-1	0	-1	0	0	-1	0
BVES-AS1	0	-1	0	0	0	-1	0	-1	0	-1	0	0	0	0	-1	0	0	0	0	0	0	0	0	-1	0	-1	0	-1	0	-1	0	0	-1	0
BYSL	0	-1	0	0	0	1	0	1	0	0	0	0	0	0	0	0	-1	0	0	-1	0	0	0	-1	0	-1	0	-1	0	0	0	0	0	0
BZW1	1	0	0	0	0	0	0	0	0	0	0	0	0	0	0	1	0	0	0	0	0	0	0	0	0	0	0	0	0	0	1	0	0	0
BZW2	0	1	1	0	0	0	-1	1	0	0	1	1	0	0	-1	1	1	0	1	0	1	0	0	1	0	1	1	1	1	0	1	1	1	-1
C10orf10	0	0	0	0	0	0	0	1	0	0	-1	0	0	0	0	0	0	0	0	0	0	0	0	0	0	-1	0	0	1	0	-1	0	0	0
C10orf105	1	0	0	0	0	0	0	1	0	0	0	0	0	0	0	0	0	0	0	0	0	0	0	0	0	-1	1	0	1	0	-1	0	0	0
C10orf107	1	0	0	0	0	0	0	1	0	0	0	0	0	0	0	0	0	0	0	0	0	0	0	0	0	-1	0	0	1	0	-1	0	0	0
C10orf11	0	0	0	0	0	0	0	1	0	0	0	0	0	0	0	0	0	0	0	0	0	0	0	0	0	-1	1	0	1	0	-1	0	0	0
C10orf111	0	0	1	0	0	-1	1	1	0	0	-1	0	0	0	0	0	0	0	0	0	0	0	1	-1	0	-1	0	0	0	0	-1	0	0	0
C10orf113	0	0	1	0	0	-1	0	1	0	0	-1	0	0	0	0	0	0	0	0	0	0	0	1	-1	0	-1	0	0	0	0	-1	0	0	0
C10orf12	0	0	0	0	0	0	0	1	0	0	0	0	0	0	0	0	0	0	0	0	0	0	0	0	0	-1	0	0	0	0	-1	0	0	0
C10orf120	0	0	0	0	0	0	0	1	0	0	0	0	1	0	0	0	0	0	0	0	0	0	0	0	0	-1	0	0	0	0	-1	0	0	0
C10orf128	0	0	0	0	0	0	0	1	0	0	-1	0	0	0	0	0	0	0	0	0	0	0	0	0	0	-1	0	0	1	0	-1	0	0	0
C10orf131	0	0	0	0	0	0	0	1	0	0	0	0	0	0	0	0	0	0	0	0	0	0	0	0	0	-1	0	0	0	0	-1	0	0	0
C10orf142	0	0	0	0	0	0	0	1	0	0	-1	0	0	0	0	0	0	0	0	0	0	0	0	0	0	-1	0	0	1	0	-1	0	0	0
C10orf2	0	0	0	0	0	0	0	1	0	0	0	0	1	0	0	0	0	0	0	0	0	0	0	0	0	-1	0	0	0	0	-1	0	0	0
C10orf25	0	0	0	0	0	0	0	1	0	0	-1	0	0	0	0	0	0	0	0	0	0	0	0	0	0	-1	0	0	1	0	-1	0	0	0
C10orf35	1	0	0	0	0	0	0	1	0	0	0	0	0	0	0	0	0	0	0	0	0	0	0	0	0	-1	1	0	1	0	-1	0	0	0
C10orf53	0	0	0	0	0	0	0	1	0	0	-1	0	0	0	0	0	0	0	0	0	0	0	0	0	0	-1	0	0	1	0	-1	0	0	0
C10orf54	1	0	0	0	0	0	0	1	0	0	0	0	0	0	0	0	0	0	0	0	0	0	0	0	0	-1	1	0	1	0	-1	0	0	0
C10orf55	0	0	0	0	0	0	0	1	0	0	0	0	0	0	0	0	0	0	0	0	0	0	0	0	0	-1	1	0	1	0	-1	0	1	0
C10orf62	0	0	0	0	0	0	0	1	0	0	0	0	0	0	0	0	0	0	0	0	0	0	0	0	0	-1	0	0	0	0	-1	0	0	0
C10orf67	0	0	1	0	0	-1	0	1	0	0	-1	0	0	0	0	0	0	0	0	0	0	0	1	-1	0	-1	0	0	0	0	-1	0	0	0
C10orf71	0	0	0	0	0	0	0	1	0	0	-1	0	0	0	0	0	0	0	0	0	0	0	0	0	0	-1	0	0	1	0	-1	0	0	0
C10orf76	0	0	0	0	0	0	0	1	0	0	0	0	1	0	0	0	0	0	0	0	0	0	0	0	0	-1	0	0	0	0	-1	0	0	0
C10orf82	0	0	0	0	0	0	0	1	0	0	0	0	1	0	0	0	0	0	0	0	0	0	0	0	0	-1	0	0	0	0	-1	0	0	0
C10orf88	0	0	0	0	0	0	0	1	0	0	0	0	1	0	0	0	0	0	0	0	0	0	0	0	0	-1	0	0	0	0	-1	0	0	0
C10orf90	0	0	0	0	0	0	0	1	0	0	0	0	1	0	0	0	0	0	0	0	0	0	0	0	0	-1	0	0	0	0	-1	0	0	0
C10orf91	0	0	0	0	0	0	1	1	0	0	0	0	-1	0	0	0	0	0	0	0	0	0	0	0	0	-1	0	0	0	0	-1	0	0	0
C10orf95	0	0	0	0	0	0	0	1	0	0	0	0	1	0	0	0	0	0	0	0	0	0	0	0	0	-1	0	0	0	0	-1	0	0	0
C10orf99	0	0	0	0	0	0	0	1	0	0	-1	0	0	0	0	0	0	0	0	0	0	0	0	0	0	-1	1	0	1	0	-1	0	0	0
C11orf1	1	0	0	0	0	0	0	1	1	1	0	0	0	0	1	1	0	0	0	1	0	0	0	0	0	0	0	0	1	1	1	0	0	1
C11orf16	0	0	0	0	0	0	0	0	1	1	0	0	0	0	1	0	0	0	0	1	0	0	0	0	0	0	0	0	1	-1	1	0	0	1
C11orf21	0	0	0	0	0	0	0	0	1	0	0	0	0	0	1	0	0	0	0	1	0	0	0	0	0	0	0	-1	1	-1	1	0	0	1
C11orf24	1	0	0	0	0	0	0	1	1	1	0	0	0	0	1	1	0	0	0	1	0	0	0	0	0	0	0	0	1	0	1	0	1	1
C11orf40	0	0	0	0	0	0	0	0	1	0	0	0	0	0	1	0	0	0	0	1	0	0	0	0	0	0	0	0	1	-1	1	0	0	1
C11orf42	0	0	0	0	0	0	0	0	1	0	0	0	0	0	1	0	0	0	0	1	0	0	0	0	0	0	0	0	1	-1	1	0	0	1
C11orf44	1	0	0	0	0	0	0	1	1	1	0	0	0	0	1	1	0	0	0	1	0	0	0	0	0	0	0	0	0	1	1	0	0	1
C11orf45	1	0	0	0	0	0	0	1	1	1	0	0	0	0	1	1	0	0	0	1	0	0	0	0	0	0	0	0	0	1	1	0	0	1
C11orf49	0	0	0	0	0	0	0	0	0	1	0	0	0	0	1	0	0	0	0	1	0	0	0	1	0	0	0	0	1	0	1	0	0	1
C11orf53	1	0	0	0	0	0	0	1	1	1	0	0	0	0	1	1	0	0	0	1	0	0	0	0	0	0	0	0	1	1	1	0	0	1
C11orf54	1	0	0	0	0	0	0	1	1	1	0	0	0	0	1	1	0	0	0	1	0	0	0	0	0	0	0	0	1	1	1	0	0	1
C11orf57	1	0	0	0	0	0	0	1	1	1	0	0	0	0	1	1	0	0	0	1	0	0	0	0	0	0	0	0	1	1	1	0	0	1
C11orf58	0	0	0	0	0	0	0	0	0	1	0	0	0	0	1	0	0	0	0	1	0	0	0	0	0	0	0	0	1	-1	1	0	0	1
C11orf63	1	0	0	0	0	0	0	1	1	1	0	0	0	0	1	1	0	0	0	1	0	0	0	0	0	0	0	0	0	1	1	0	0	1
C11orf65	1	0	0	0	0	0	0	1	1	1	0	0	0	0	1	1	0	0	0	1	0	0	0	0	0	0	0	0	1	1	1	0	0	1
C11orf68	0	0	0	0	0	0	0	-1	0	1	0	0	0	0	1	1	0	0	0	1	0	0	0	0	0	0	0	0	1	0	1	0	0	1
C11orf70	1	0	0	0	0	0	0	1	1	1	0	0	0	0	1	1	0	0	0	1	0	0	0	0	0	0	0	0	1	1	1	0	1	1
C11orf71	1	0	0	0	0	0	0	-1	1	1	0	0	0	0	1	1	0	0	0	1	0	0	0	0	0	0	0	0	0	1	1	0	0	1
C11orf74	0	0	0	0	0	0	0	0	0	1	0	0	0	0	1	0	0	0	0	1	0	0	0	0	0	0	0	0	1	0	1	0	0	1
C11orf80	1	0	0	0	0	0	0	1	0	1	0	0	0	0	1	1	0	0	0	1	0	0	0	0	0	0	0	0	1	0	1	0	0	1
C11orf84	0	0	0	0	0	0	0	1	0	1	0	0	0	0	1	1	0	0	0	1	0	0	0	0	0	0	0	0	1	0	1	0	0	1
C11orf86	1	0	0	0	0	0	0	1	1	1	0	0	0	0	1	1	0	0	0	1	0	0	0	0	0	0	0	0	1	0	1	0	0	1
C11orf87	1	0	0	0	0	0	0	1	1	1	0	0	0	0	1	1	0	0	0	1	0	0	0	0	0	0	0	0	1	1	1	0	0	1
C11orf88	1	0	0	0	0	0	0	1	1	1	0	0	0	0	1	1	0	0	0	1	0	0	0	0	0	0	0	0	1	1	1	0	0	1
C11orf91	0	0	0	0	0	0	0	0	0	1	0	0	0	0	1	0	0	0	0	1	0	0	0	0	0	0	0	0	1	0	1	0	0	1
C11orf94	0	0	0	0	0	0	0	0	0	1	0	0	0	0	1	0	0	0	0	1	0	0	0	0	0	0	0	0	1	0	1	0	0	1
C11orf95	0	0	0	0	0	0	0	1	0	1	0	0	0	0	1	1	0	0	0	1	0	0	0	0	0	0	0	0	1	0	1	0	0	1
C11orf96	0	0	0	0	0	0	0	0	0	1	0	0	0	0	1	0	0	0	0	1	0	0	0	0	0	0	0	0	1	0	1	0	0	1
C11orf97	1	0	0	0	0	0	0	1	1	1	0	0	0	0	1	1	0	0	0	1	0	0	0	0	0	0	0	0	1	1	1	0	1	1
C12orf10	0	0	0	1	0	0	0	1	0	0	0	0	0	0	0	0	0	0	0	0	0	0	0	0	0	0	0	0	1	0	0	1	0	0
C12orf29	0	0	0	1	0	0	0	-1	0	0	0	0	0	0	0	0	0	1	0	0	0	0	0	0	0	-1	0	0	0	0	0	1	0	0
C12orf4	1	0	0	1	0	0	1	1	0	1	-1	0	0	0	0	1	0	0	0	1	0	0	0	0	1	-1	0	1	1	0	0	0	0	0
C12orf40	1	0	0	1	0	0	1	1	0	1	0	0	0	0	0	-1	0	0	0	0	0	0	0	0	0	0	0	0	0	0	0	1	0	0
C12orf42	0	0	0	1	0	0	0	-1	0	0	0	0	0	0	0	0	0	1	0	0	0	0	0	0	0	-1	0	0	0	0	0	1	0	0
C12orf43	0	0	0	1	0	1	0	1	0	0	1	0	0	0	0	0	0	1	0	1	0	0	0	0	0	-1	0	0	0	0	0	1	0	0
C12orf45	0	0	0	1	0	0	0	-1	0	0	0	0	0	0	0	0	0	1	0	0	0	0	0	0	0	-1	0	0	0	0	0	1	0	0
C12orf49	0	0	0	1	0	1	0	1	0	0	1	0	0	0	0	0	0	1	0	0	0	0	0	0	0	-1	0	0	0	0	0	1	0	0
C12orf50	0	0	0	1	0	0	0	-1	0	0	0	0	0	0	0	0	0	1	0	0	0	0	0	0	0	-1	0	0	0	0	0	1	0	0
C12orf54	1	0	0	1	0	0	0	1	0	1	0	0	0	0	0	0	0	0	0	0	0	0	0	0	0	0	0	0	1	0	0	1	0	0
C12orf56	0	0	0	1	0	0	0	1	0	0	0	0	0	0	0	0	0	0	0	0	0	0	0	0	0	-1	0	0	0	0	0	1	0	0
C12orf57	1	0	0	1	0	0	1	1	0	1	-1	0	0	0	0	1	0	0	0	1	0	0	0	0	1	-1	0	1	1	0	0	0	0	0
C12orf60	1	0	0	1	0	0	1	1	0	1	-1	0	0	0	0	1	0	0	0	1	0	0	0	0	1	-1	0	1	1	0	0	0	0	0
C12orf65	0	0	0	1	0	1	0	1	0	0	1	0	0	0	0	0	0	1	0	1	0	0	0	0	0	-1	0	0	0	0	0	1	0	0
C12orf66	0	0	0	1	0	0	0	-1	0	0	0	0	0	0	0	0	0	0	0	0	0	0	0	0	0	-1	0	0	0	0	0	1	0	0
C12orf71	1	0	0	1	0	0	1	1	0	1	0	0	0	0	1	1	0	0	-1	1	0	0	0	0	1	0	0	1	1	0	0	1	1	1
C12orf73	0	0	0	1	0	0	0	-1	0	0	0	0	0	0	0	0	0	1	0	0	0	0	0	0	0	-1	0	0	0	0	0	1	0	0
C12orf74	0	0	0	1	0	0	0	-1	0	0	0	0	0	0	0	0	0	1	0	0	0	0	0	0	0	-1	0	0	0	0	0	1	0	0
C12orf75	0	0	0	1	0	0	0	-1	0	0	0	0	0	0	0	0	0	1	0	0	0	0	0	0	0	-1	0	0	0	0	0	1	0	0
C12orf76	0	0	0	1	0	0	0	1	0	0	0	0	0	0	0	0	0	1	0	0	0	0	0	0	0	-1	0	0	0	0	0	1	0	0
C12orf77	1	0	0	1	0	0	1	1	0	1	0	0	0	0	1	1	0	0	0	1	0	0	0	0	1	0	0	1	1	0	0	1	0	1
C12orf80	0	0	0	1	0	0	0	1	0	0	0	0	0	0	0	0	0	0	0	0	0	0	0	0	0	0	0	0	1	0	0	1	0	0
C14orf1	0	0	0	0	0	0	0	0	0	0	0	0	0	0	-1	0	-1	0	0	0	0	-1	0	0	0	-1	1	1	0	0	-1	0	-1	-1
C14orf105	0	0	0	0	0	0	0	0	0	0	0	0	0	0	-1	0	-1	0	0	0	0	-1	0	0	0	-1	1	0	0	0	-1	0	-1	-1
C14orf119	0	0	-1	0	0	0	0	0	0	0	0	0	0	0	-1	0	-1	0	0	0	0	-1	0	0	0	-1	0	0	0	0	-1	0	-1	-1
C14orf132	0	0	0	0	0	0	0	0	0	0	0	0	0	0	-1	-1	-1	0	0	0	0	-1	0	0	0	-1	1	1	0	1	-1	0	-1	-1
C14orf159	0	0	0	0	0	0	0	0	0	0	0	0	0	0	-1	-1	-1	0	0	0	0	-1	0	0	0	-1	1	1	0	1	-1	0	-1	-1
C14orf166	0	0	0	0	0	0	0	0	0	0	0	0	0	0	-1	0	-1	0	0	0	0	-1	0	0	0	-1	1	0	0	0	-1	0	-1	-1
C14orf177	0	0	0	0	0	0	0	0	0	0	0	0	0	0	-1	-1	-1	0	0	0	0	-1	0	0	0	-1	1	1	0	1	-1	0	-1	-1
C14orf178	0	0	0	0	0	0	0	0	0	0	0	0	0	0	-1	0	-1	0	0	0	0	-1	0	0	0	-1	1	1	0	0	-1	0	-1	-1
C14orf180	0	0	0	0	0	-1	0	0	0	0	0	0	0	0	-1	-1	-1	0	0	0	0	-1	0	0	0	-1	1	1	0	1	-1	0	-1	-1
C14orf2	0	0	0	0	0	-1	0	0	0	0	0	0	0	0	-1	-1	-1	0	0	0	0	-1	0	0	0	-1	1	1	0	1	-1	0	-1	-1
C14orf28	-1	0	-1	0	0	0	0	0	0	0	0	0	0	0	-1	0	-1	0	0	0	0	-1	0	0	0	-1	1	0	0	0	-1	0	-1	-1
C14orf37	0	0	0	0	0	0	0	0	0	0	0	0	0	0	-1	0	-1	0	0	0	0	-1	0	0	0	-1	1	0	0	0	-1	0	-1	-1
C14orf39	0	0	0	0	0	0	0	0	0	0	0	0	0	0	-1	0	-1	0	0	0	0	-1	0	0	0	-1	1	0	0	0	-1	0	-1	-1
C14orf79	0	0	0	0	0	-1	0	0	0	0	0	0	0	0	-1	-1	-1	0	0	0	0	-1	0	0	0	-1	1	1	0	1	-1	0	-1	-1
C14orf80	0	0	0	0	0	-1	0	0	0	0	0	0	0	0	-1	-1	-1	0	0	0	0	-1	0	0	0	-1	1	1	0	1	-1	0	-1	-1
C14orf93	0	0	-1	0	0	0	0	0	0	0	0	0	0	0	-1	0	-1	0	0	0	0	-1	0	0	0	-1	0	0	0	0	-1	0	-1	-1
C15orf32	0	1	1	0	0	1	-1	1	0	0	0	0	0	0	1	0	0	0	0	1	1	0	0	0	-1	1	0	0	0	0	0	0	0	1
C15orf38-AP3S2	0	1	1	0	0	1	-1	1	0	0	0	0	0	0	1	0	0	0	0	1	1	0	0	0	-1	1	0	0	0	0	0	0	0	1
C15orf39	0	0	1	0	0	1	1	1	0	0	0	0	0	0	1	1	0	0	0	1	1	0	0	0	-1	1	0	0	0	0	-1	0	0	1
C15orf40	0	0	1	0	0	1	1	1	0	0	0	0	0	0	1	0	0	0	0	1	1	0	0	1	-1	1	0	0	0	0	0	0	0	1
C15orf41	0	0	0	0	0	1	0	1	0	0	0	0	0	0	1	1	0	0	0	1	1	0	0	-1	-1	0	0	-1	0	0	-1	0	0	1
C15orf48	0	0	0	0	0	1	1	1	0	0	0	0	0	0	1	1	0	0	0	1	1	0	0	-1	-1	0	0	-1	0	0	-1	0	0	1
C15orf52	0	0	0	0	0	1	0	1	0	0	0	0	0	0	1	1	0	0	0	1	1	0	0	-1	-1	0	0	-1	0	0	-1	0	0	1
C15orf53	0	0	0	0	0	1	0	1	0	0	0	0	0	0	1	1	0	0	0	1	1	0	0	-1	-1	0	0	-1	0	0	-1	0	0	1
C15orf54	0	0	0	0	0	1	0	1	0	0	0	0	0	0	1	1	0	0	0	1	1	0	0	-1	-1	0	0	-1	0	0	-1	0	0	1
C15orf56	0	0	0	0	0	1	0	1	0	0	0	0	0	0	1	1	0	0	0	1	1	0	0	-1	-1	0	0	-1	0	0	-1	0	0	1
C15orf57	0	0	0	0	0	1	0	0	0	0	0	0	0	0	1	1	0	0	0	1	1	0	0	-1	-1	0	0	-1	0	0	-1	0	0	1
C15orf59	0	0	1	0	0	1	1	1	0	0	0	0	0	0	1	1	0	0	0	1	1	0	0	0	-1	1	0	0	0	0	-1	0	0	1
C15orf61	0	0	1	0	0	1	1	1	0	0	0	0	0	0	1	1	0	0	0	1	1	0	0	-1	-1	1	0	0	0	0	-1	0	0	1
C15orf62	0	0	0	0	0	1	0	0	0	0	0	0	0	0	1	1	0	0	0	1	1	0	0	-1	-1	0	0	-1	0	0	-1	0	0	1
C15orf65	0	0	0	0	0	1	1	1	0	0	0	0	0	0	1	1	0	0	0	1	1	0	0	-1	-1	0	0	-1	0	0	-1	0	0	1
C16orf45	-1	0	0	0	0	0	1	0	0	0	0	0	0	0	0	-1	0	0	0	0	0	0	0	0	0	0	0	0	0	0	-1	0	0	0
C16orf46	0	0	0	0	0	0	0	0	0	0	-1	0	1	0	0	-1	-1	0	0	0	0	0	-1	-1	0	0	0	0	1	0	-1	0	0	0
C16orf52	-1	0	0	0	0	0	1	0	0	0	0	0	0	0	0	-1	-1	0	0	0	0	0	0	0	0	0	0	0	0	0	-1	0	-1	0
C16orf54	-1	0	0	0	0	0	1	0	0	0	0	0	0	0	0	-1	0	0	0	0	0	0	0	0	0	0	0	0	0	0	-1	0	0	0
C16orf58	-1	0	0	0	0	0	1	0	0	0	0	0	0	0	0	-1	0	0	0	0	0	0	0	0	0	0	0	0	0	0	-1	0	0	0
C16orf59	0	0	-1	0	0	0	0	0	0	0	0	0	0	0	0	-1	0	0	0	0	0	0	0	0	0	0	0	0	0	0	-1	0	-1	0
C16orf62	-1	0	0	0	0	0	1	0	0	0	0	0	0	0	0	-1	-1	0	0	0	0	0	0	0	0	0	0	0	0	0	-1	0	-1	0
C16orf70	0	0	0	0	0	0	1	0	0	0	0	0	0	0	0	0	-1	0	0	0	0	0	0	-1	0	0	0	0	1	0	-1	0	0	0
C16orf71	-1	0	-1	0	0	0	0	0	0	0	0	0	0	0	0	-1	0	0	0	0	0	0	0	0	0	0	0	0	0	0	-1	0	-1	0
C16orf72	-1	0	0	0	0	0	0	0	0	0	0	0	0	0	0	-1	0	0	0	0	0	0	0	0	0	0	0	0	0	0	-1	0	-1	0
C16orf74	0	0	0	0	0	0	0	0	0	0	0	0	1	0	0	-1	-1	0	0	0	0	0	0	-1	0	0	0	0	0	0	-1	0	0	0
C16orf78	0	0	0	0	0	0	1	0	0	0	0	0	0	0	0	0	0	0	0	0	0	0	0	-1	0	0	0	0	1	0	-1	0	0	0
C16orf82	-1	0	0	0	0	0	1	0	0	0	0	0	0	0	0	-1	0	0	0	0	0	0	0	0	0	0	0	0	0	0	-1	0	-1	0
C16orf86	0	0	0	0	0	0	1	0	0	0	0	0	0	0	0	0	-1	0	0	0	0	0	0	-1	0	0	0	0	1	0	-1	0	0	0
C16orf87	-1	0	0	0	0	0	1	0	0	0	0	0	0	0	0	0	0	0	0	0	0	0	0	-1	0	0	0	0	1	0	-1	0	0	0
C16orf89	-1	0	-1	0	0	0	0	0	0	0	0	0	0	0	0	-1	0	0	0	0	0	0	0	0	0	0	0	0	0	0	-1	0	-1	0
C16orf90	-1	0	-1	0	0	0	0	0	0	0	0	0	0	0	0	-1	0	0	0	0	0	0	0	0	0	0	0	0	0	0	-1	0	-1	0
C16orf91	0	0	-1	0	0	0	0	0	0	0	0	0	0	0	0	-1	0	0	0	0	0	0	0	0	0	0	0	0	0	0	-1	0	-1	0
C16orf92	-1	0	0	0	0	0	1	0	0	0	0	0	0	0	0	-1	0	0	0	0	0	0	0	0	0	0	0	0	0	0	-1	0	0	0
C16orf95	0	0	0	0	0	0	0	0	0	0	0	0	1	0	0	-1	-1	0	0	0	0	0	0	-1	0	0	0	0	0	0	-1	0	0	0
C16orf96	-1	0	-1	0	0	0	0	0	0	0	0	0	0	0	0	-1	0	0	0	0	0	0	0	0	0	0	0	0	0	0	-1	0	-1	0
C16orf97	0	0	0	0	0	0	1	0	0	0	0	0	0	0	0	0	0	0	0	0	0	0	0	-1	0	0	0	0	1	0	-1	0	0	0
C17orf102	0	0	0	0	0	1	0	1	0	1	0	0	0	0	1	0	1	0	0	0	0	1	0	0	0	-1	0	0	0	0	0	0	0	1
C17orf105	0	0	0	0	0	1	0	1	0	1	0	0	0	0	0	0	1	0	0	0	0	1	0	0	0	-1	0	0	0	0	0	0	0	0
C17orf107	-1	-1	0	0	0	0	0	0	0	-1	-1	0	0	0	-1	0	-1	0	0	-1	0	-1	0	-1	-1	-1	0	0	1	-1	0	0	-1	-1
C17orf112	0	-1	0	0	0	1	0	1	0	1	-1	0	1	0	0	0	1	0	0	0	0	1	0	0	0	-1	0	0	0	0	0	0	0	0
C17orf47	0	-1	0	0	0	1	0	1	0	1	-1	0	1	0	0	0	1	0	0	0	0	1	0	0	0	-1	0	0	0	0	0	0	0	0
C17orf50	0	0	0	0	0	1	0	1	0	1	0	0	0	0	1	0	1	0	0	0	0	1	0	0	0	-1	0	0	0	0	0	0	0	1
C17orf51	1	0	0	0	0	0	0	0	0	1	0	0	0	0	-1	0	0	0	0	-1	0	-1	0	0	-1	-1	0	0	0	0	1	0	-1	-1
C17orf53	0	0	0	0	0	1	0	1	0	1	0	0	0	0	0	0	1	0	0	0	0	1	0	0	0	-1	0	0	0	0	0	0	0	0
C17orf58	0	0	0	0	0	1	0	1	0	1	-1	0	1	0	1	0	1	0	0	0	0	1	0	0	0	-1	0	0	1	0	0	0	0	1
C17orf62	0	1	0	0	0	1	0	1	0	1	-1	0	1	0	0	0	1	0	0	0	0	1	0	0	0	-1	0	0	1	1	0	0	0	0
C17orf64	0	0	0	0	0	1	0	1	0	1	-1	0	1	0	0	0	1	0	0	0	0	1	0	0	0	-1	0	0	1	0	0	0	0	0
C17orf67	0	-1	0	0	0	1	0	1	0	1	-1	0	1	0	0	0	1	0	0	0	0	1	0	0	0	-1	0	0	0	0	0	0	0	0
C17orf74	-1	-1	0	0	0	0	0	-1	0	-1	-1	0	0	0	-1	0	-1	0	0	-1	0	-1	0	-1	-1	-1	0	0	1	-1	0	0	-1	-1
C17orf75	0	0	0	0	0	1	0	1	0	1	0	0	0	0	1	0	1	0	0	0	0	1	0	0	0	-1	0	0	0	0	0	0	0	1
C17orf77	0	-1	0	0	0	1	0	1	0	1	-1	0	1	0	0	0	1	0	0	0	0	1	0	0	0	-1	0	0	1	1	0	0	0	0
C17orf78	0	0	0	0	0	1	0	1	0	1	0	0	0	0	1	0	1	0	0	0	0	1	0	0	0	-1	0	0	0	0	0	0	0	1
C17orf80	0	-1	0	0	0	1	0	1	0	1	-1	0	1	0	0	0	1	0	0	0	0	1	0	0	0	-1	0	0	1	1	0	0	0	0
C17orf82	0	0	0	0	0	1	0	1	0	1	-1	0	1	0	0	0	1	0	0	0	0	1	0	0	0	-1	0	0	1	0	0	0	0	0
C17orf96	0	0	0	0	0	1	0	1	0	1	0	0	0	0	1	0	1	0	0	0	0	1	0	0	0	-1	0	0	0	0	0	0	0	1
C17orf97	1	-1	0	0	0	0	0	0	0	-1	-1	0	0	0	-1	0	-1	0	0	-1	0	-1	0	-1	-1	-1	0	0	1	-1	0	0	-1	-1
C17orf98	0	0	0	0	0	1	0	1	0	1	0	0	0	0	1	0	1	0	0	0	0	1	0	0	0	-1	0	0	0	0	0	0	0	1
C17orf99	0	-1	0	0	0	1	0	1	0	1	-1	0	1	0	0	0	1	0	0	0	0	1	0	0	0	-1	0	0	1	1	0	0	0	0
C18orf21	-1	0	0	0	-1	-1	0	0	0	-1	-1	0	0	0	-1	-1	-1	0	0	-1	0	0	0	-1	-1	-1	0	-1	-1	-1	-1	0	1	-1
C18orf25	-1	-1	0	0	-1	-1	0	0	0	-1	-1	0	0	0	-1	-1	-1	-1	0	-1	0	0	0	-1	1	-1	0	-1	-1	-1	-1	0	-1	-1
C18orf32	-1	-1	-1	0	-1	-1	0	0	0	-1	-1	0	0	0	-1	-1	-1	-1	0	-1	0	0	0	-1	-1	-1	0	-1	-1	-1	-1	0	-1	-1
C18orf54	-1	-1	-1	0	-1	-1	0	-1	0	-1	-1	0	0	0	-1	-1	-1	-1	0	-1	0	0	0	-1	-1	-1	0	-1	-1	-1	-1	0	-1	-1
C18orf61	1	-1	0	0	1	-1	0	0	0	-1	-1	0	0	0	1	-1	-1	-1	0	-1	0	0	0	-1	-1	-1	0	0	0	-1	-1	0	0	1
C18orf63	-1	-1	-1	0	-1	-1	0	-1	0	-1	-1	0	0	0	-1	-1	-1	-1	0	-1	0	0	0	-1	-1	-1	0	-1	-1	-1	-1	0	-1	-1
C18orf65	-1	-1	-1	0	-1	-1	0	0	0	-1	-1	0	0	0	-1	-1	-1	-1	0	-1	0	0	0	-1	-1	-1	0	-1	-1	-1	-1	0	-1	-1
C18orf8	-1	-1	0	0	0	-1	0	0	0	-1	-1	0	0	0	-1	-1	-1	1	0	-1	0	0	0	-1	1	-1	0	0	0	-1	-1	0	1	-1
C19orf12	0	0	0	0	0	0	0	0	0	0	-1	0	0	0	1	-1	0	0	0	0	0	0	0	-1	0	-1	0	1	0	0	0	0	1	1
C19orf18	-1	0	0	0	0	0	0	0	0	0	0	-1	0	0	1	1	0	0	0	0	0	0	0	-1	0	-1	0	1	0	0	-1	0	0	1
C19orf24	-1	0	0	0	0	-1	1	0	0	0	0	0	0	0	-1	0	0	0	0	0	0	0	0	-1	0	-1	0	-1	0	-1	0	0	-1	-1
C19orf25	-1	0	0	0	0	-1	0	0	0	0	0	0	0	0	-1	0	0	0	0	0	0	0	0	-1	0	-1	0	-1	0	-1	0	0	-1	-1
C19orf33	0	0	0	0	0	0	0	0	0	0	0	0	0	0	1	-1	0	0	0	0	0	0	0	-1	0	-1	0	1	0	0	1	0	1	1
C19orf35	-1	0	0	0	0	-1	0	0	0	0	0	0	0	0	-1	0	0	0	0	0	0	0	0	-1	0	-1	0	-1	0	-1	0	0	-1	-1
C19orf38	-1	0	0	0	0	0	0	0	0	0	0	0	0	0	-1	0	0	0	0	0	0	0	0	-1	0	-1	0	1	0	-1	0	0	-1	-1
C19orf43	-1	0	0	0	0	0	0	0	0	0	0	0	0	0	-1	0	0	0	0	0	0	0	0	-1	0	-1	0	1	0	0	0	0	-1	-1
C19orf44	-1	0	0	0	0	0	0	0	0	0	0	0	0	0	-1	0	0	0	0	0	0	0	0	-1	0	-1	0	1	0	-1	0	0	-1	-1
C19orf45	-1	0	0	0	0	0	0	0	0	0	0	0	0	0	-1	0	0	0	0	0	0	0	0	-1	0	-1	0	1	0	-1	0	0	-1	-1
C19orf47	0	0	0	0	0	0	0	0	0	0	0	0	0	0	1	0	0	0	0	0	0	0	0	-1	0	-1	0	1	0	0	1	0	1	1
C19orf48	-1	0	0	0	0	0	0	0	0	0	0	0	0	0	1	1	0	0	0	0	0	0	0	-1	0	-1	0	1	0	0	-1	0	0	1
C19orf52	-1	0	0	0	0	0	0	0	0	0	0	0	0	0	-1	0	0	0	0	0	0	0	0	-1	0	-1	0	1	0	-1	0	0	-1	-1
C19orf53	-1	0	0	0	0	0	0	0	0	0	0	0	0	0	-1	0	0	0	0	0	0	0	0	-1	0	-1	0	1	0	0	0	0	-1	-1
C19orf54	0	0	0	0	0	0	0	0	0	0	0	0	0	0	1	0	0	0	0	0	0	0	0	-1	0	-1	0	1	0	0	1	0	-1	1
C19orf57	-1	0	0	0	0	0	0	0	0	0	0	0	0	0	-1	0	0	0	0	0	0	0	0	-1	0	-1	0	1	0	0	0	0	-1	-1
C19orf60	-1	0	0	0	0	0	0	0	0	0	0	0	0	0	-1	0	0	0	0	0	0	0	0	-1	0	-1	0	1	0	-1	0	0	-1	-1
C19orf66	-1	0	0	0	0	0	0	0	0	0	0	0	0	0	-1	0	0	0	0	0	0	0	0	-1	0	-1	0	1	0	-1	0	0	-1	-1
C19orf67	-1	0	0	0	0	0	0	0	0	0	0	0	0	0	-1	0	0	0	0	0	0	0	0	-1	0	-1	0	1	0	0	0	0	-1	-1
C19orf70	-1	0	0	0	0	0	0	0	0	0	0	0	0	0	-1	0	0	0	0	0	0	0	0	-1	0	-1	0	0	0	-1	0	0	-1	-1
C19orf71	-1	0	0	0	0	-1	0	0	0	0	0	0	0	0	-1	0	0	0	0	0	0	0	0	-1	0	-1	0	-1	0	-1	0	0	-1	-1
C19orf73	-1	0	0	0	0	0	0	0	0	0	0	0	0	0	1	0	0	0	0	0	0	0	0	-1	-1	-1	0	1	0	0	-1	0	0	1
C19orf81	-1	0	0	0	0	0	0	0	0	0	0	0	0	0	1	1	0	0	0	0	0	0	0	-1	0	-1	0	1	0	0	-1	0	0	1
C19orf84	-1	0	0	0	0	0	0	0	0	0	0	0	0	0	1	1	0	0	0	0	0	0	0	-1	0	-1	0	1	0	0	-1	0	0	1
C1D	1	0	0	0	0	0	0	0	1	1	0	0	0	0	0	0	0	0	0	0	0	0	0	0	0	0	0	1	0	0	1	0	0	0
C1GALT1	0	1	1	0	0	0	-1	1	0	0	1	1	0	0	0	1	1	0	1	0	1	0	0	1	0	1	1	1	1	0	1	0	1	0
C1GALT1C1L	0	0	0	0	0	0	1	0	1	1	0	0	0	0	0	0	0	0	0	0	0	0	0	0	0	0	0	1	0	0	1	0	0	0
C1orf100	0	0	0	1	0	1	0	1	0	0	1	0	0	0	0	0	0	0	0	-1	0	0	0	-1	0	1	0	0	0	0	0	0	0	0
C1orf101	0	0	0	1	0	1	0	1	0	0	1	0	0	0	0	0	0	0	0	-1	0	0	0	-1	0	1	0	0	0	0	0	0	0	0
C1orf105	0	0	0	0	0	1	0	1	0	0	0	0	0	0	0	0	0	0	0	0	0	0	0	-1	0	1	0	0	0	0	0	0	0	0
C1orf106	0	0	0	1	0	1	0	1	0	0	0	0	0	0	0	0	0	0	0	0	0	-1	0	-1	0	1	0	0	0	0	0	0	0	0
C1orf109	-1	0	0	0	0	0	0	0	0	0	0	0	0	0	0	0	0	0	0	-1	0	-1	0	-1	0	-1	0	0	0	0	-1	0	0	0
C1orf111	0	0	0	1	0	1	1	1	0	0	0	0	0	0	0	0	0	0	0	0	0	0	0	-1	0	1	0	0	0	0	0	0	0	0
C1orf112	0	0	0	0	0	1	0	1	0	0	0	0	0	0	0	0	0	0	0	0	0	0	0	-1	0	1	0	0	0	0	0	0	0	0
C1orf115	0	0	0	1	0	1	0	1	0	0	1	0	0	0	0	0	0	0	0	-1	0	-1	0	-1	0	1	0	0	0	0	0	0	0	0
C1orf116	0	0	0	1	0	1	0	1	0	0	1	0	0	0	0	0	0	0	0	0	0	-1	0	-1	0	1	0	0	0	0	0	0	0	0
C1orf122	-1	0	0	0	0	0	0	0	0	0	0	0	0	0	0	0	0	0	0	-1	0	-1	0	-1	0	-1	0	0	0	0	-1	0	0	0
C1orf123	-1	0	0	0	0	0	0	0	0	0	0	0	0	0	1	0	0	0	0	-1	0	-1	0	-1	0	-1	0	0	0	-1	-1	0	0	0
C1orf127	-1	0	0	-1	0	0	0	0	0	0	0	0	0	0	0	0	0	0	0	-1	0	-1	0	-1	0	-1	0	0	0	0	-1	0	1	0
C1orf131	0	0	0	1	0	1	0	1	0	0	1	0	0	0	0	0	0	0	0	-1	0	-1	0	-1	0	1	0	0	0	0	0	0	0	0
C1orf140	0	0	0	1	0	1	0	1	0	0	1	0	0	0	0	0	0	0	0	-1	0	-1	0	-1	0	1	0	0	0	0	0	0	0	0
C1orf141	-1	0	0	0	0	0	0	0	0	0	-1	0	0	0	0	0	0	0	0	-1	0	-1	0	-1	0	-1	0	0	0	-1	-1	0	0	0
C1orf145	0	0	0	1	0	1	0	1	0	0	1	0	0	0	0	0	0	0	0	-1	0	-1	0	-1	0	1	0	0	0	0	0	0	0	0
C1orf146	-1	0	0	0	0	-1	1	0	0	0	0	0	0	0	0	0	0	0	0	-1	0	-1	0	-1	0	-1	0	0	0	-1	-1	0	0	0
C1orf158	-1	0	0	-1	0	0	0	0	0	0	0	-1	0	0	0	0	0	0	0	-1	0	-1	0	-1	0	-1	0	0	0	0	-1	0	0	0
C1orf159	-1	0	0	-1	0	0	0	0	0	0	0	0	0	0	0	0	0	0	0	-1	0	-1	0	-1	0	-1	0	0	0	0	-1	0	0	0
C1orf162	-1	0	0	0	0	-1	1	0	0	0	0	0	0	0	0	0	0	0	0	0	0	-1	0	-1	0	0	0	0	0	-1	-1	0	0	0
C1orf168	-1	0	0	0	0	0	0	0	0	0	-1	0	0	0	0	0	0	0	0	-1	0	-1	0	-1	0	-1	0	0	0	-1	-1	0	0	0
C1orf174	-1	0	0	-1	0	0	1	0	0	0	0	0	0	0	0	0	0	0	0	-1	0	-1	0	-1	0	-1	0	0	0	0	-1	0	0	0
C1orf185	-1	0	0	0	0	0	0	0	0	0	0	0	0	0	0	0	0	0	0	-1	0	-1	0	-1	0	-1	0	0	0	-1	-1	0	0	0
C1orf186	0	0	0	1	0	1	0	1	0	0	1	0	0	0	0	0	0	0	0	0	0	-1	0	-1	0	1	0	0	0	0	0	0	0	0
C1orf189	0	0	0	1	0	1	1	1	0	0	0	0	0	0	0	0	0	0	0	0	0	0	0	-1	0	1	0	0	0	0	0	0	0	0
C1orf194	-1	0	0	0	0	-1	1	0	0	0	0	0	0	0	0	0	0	0	0	0	0	-1	0	-1	0	0	0	0	0	-1	-1	0	0	0
C1orf198	0	0	0	1	0	1	0	1	0	0	1	0	0	0	0	0	0	0	0	-1	0	-1	0	-1	0	1	0	0	0	0	0	0	0	0
C1orf204	0	0	0	1	0	1	1	1	0	0	0	0	0	0	0	0	0	0	0	0	0	0	0	-1	0	1	0	0	0	0	0	0	0	0
C1orf21	0	0	0	0	0	1	0	1	0	0	0	0	0	0	0	-1	0	0	0	0	0	0	0	-1	0	1	0	0	0	0	0	0	0	0
C1orf210	-1	0	0	0	0	0	0	0	0	0	0	0	0	0	0	0	0	0	0	-1	0	-1	0	-1	0	-1	0	0	0	0	-1	0	1	0
C1orf216	-1	0	0	0	0	0	0	0	0	0	0	0	0	0	0	0	0	0	0	-1	0	-1	0	-1	0	-1	0	0	0	0	-1	0	0	0
C1orf220	0	0	0	0	0	1	0	1	0	0	0	0	0	0	0	-1	0	0	0	0	0	0	0	-1	0	1	0	0	0	0	0	0	0	0
C1orf226	0	0	0	1	0	1	1	1	0	0	0	0	0	0	0	0	0	0	0	0	0	0	0	-1	0	1	0	0	0	0	0	0	0	0
C1orf228	-1	0	0	0	0	0	0	0	0	0	0	0	0	0	0	0	0	0	0	-1	0	-1	0	-1	0	-1	0	0	0	0	-1	0	0	0
C1orf229	0	0	0	1	0	1	0	1	0	0	1	0	0	0	0	0	0	0	0	-1	0	0	0	-1	0	1	0	0	0	0	0	0	0	0
C1orf234	-1	0	0	-1	0	0	0	0	0	0	-1	0	0	0	0	0	0	0	0	-1	0	-1	0	-1	0	-1	0	0	0	0	-1	0	0	0
C1orf27	0	0	0	0	0	1	0	1	0	0	0	0	0	0	0	-1	0	0	0	0	0	0	0	-1	0	1	0	0	0	0	0	0	0	0
C1orf35	0	0	0	1	0	1	0	1	0	0	1	0	0	0	0	0	0	0	0	-1	0	-1	0	-1	0	1	0	0	0	0	0	0	0	0
C1orf43	0	0	0	1	0	1	1	1	0	0	0	0	0	0	0	0	0	0	0	0	0	0	0	-1	0	1	0	0	0	0	0	0	0	0
C1orf50	-1	0	0	0	0	0	0	0	0	0	0	0	0	0	0	0	0	0	0	-1	0	-1	0	-1	0	-1	0	0	0	0	-1	0	0	0
C1orf52	-1	0	0	0	0	-1	1	0	0	0	0	0	0	0	0	0	0	0	0	-1	0	-1	0	-1	0	-1	0	0	0	-1	-1	0	0	0
C1orf53	0	0	0	0	0	1	0	1	0	0	0	0	0	0	0	0	0	0	0	0	0	-1	0	-1	0	1	0	0	0	0	0	0	0	0
C1orf61	0	0	0	1	0	1	1	1	0	0	0	0	0	0	0	0	0	0	0	0	0	0	0	-1	0	1	0	0	0	0	0	0	0	0
C1orf64	-1	0	0	-1	0	0	0	0	0	0	-1	0	0	0	0	0	0	0	0	-1	0	-1	0	-1	0	-1	0	0	0	0	-1	0	0	0
C1orf68	0	0	0	1	0	1	1	1	0	0	0	0	0	0	0	0	0	0	0	0	0	0	0	-1	0	1	0	0	0	0	0	0	0	0
C1orf74	0	0	0	1	0	1	0	1	0	0	1	0	0	0	0	0	0	0	0	-1	0	-1	0	-1	0	1	0	0	0	0	0	0	0	0
C1orf87	-1	0	0	0	0	0	0	0	0	0	-1	0	0	0	0	0	0	0	0	-1	0	-1	0	-1	0	-1	0	0	0	-1	-1	0	0	0
C1orf94	-1	0	0	0	0	0	0	0	0	0	0	0	0	0	0	0	0	0	0	-1	0	-1	0	-1	0	-1	0	0	0	0	-1	0	0	0
C1QA	-1	0	0	-1	0	0	0	0	0	0	-1	0	0	0	0	0	0	0	0	-1	0	-1	0	-1	0	-1	0	0	0	0	-1	0	0	0
[truncated: 20,132 more rows]

## Sheet: Table_S8
Differential expression analysis, RNA (HTA array data), colon-like versusundifferentiated cell lines
logFC: log fold change (positive values: upregulated in colon-like cell lines; negative values: upregulated in undifferentiated cell lines)
isTF: related to transcription factor activity (gene ontology terms: GO:0001227|GO:0001077|GO:0003700|GO:0001205).
isKP: related to protein kinase activity (gene ontology terms: GO:0006468).
entrez	symbol	biotype	logFC	AveExpr	t	P.Value	adjusted.P.Val	B	isTF	isKP
257629	ANKS4B	protein_coding	3.38035	7.75277	12.6231	3.27888e-13	6e-09	19.397	0	0
2877	GPX2	protein_coding	5.15291	9.27294	11.3481	4.2103e-12	2.61326e-08	17.1436	0	0
3960	LGALS4	protein_coding	5.59536	9.02821	11.3408	4.27446e-12	2.61326e-08	17.1301	0	0
7113	TMPRSS2	protein_coding	2.85974	8.11742	10.2327	4.60079e-11	2.11e-07	14.9876	0	0
10110	SGK2	protein_coding	2.80052	6.8971	10.0155	7.46243e-11	2.73737e-07	14.5469	0	1
10223	GPA33	protein_coding	5.84836	8.98002	9.71658	1.46671e-10	4.48347e-07	13.9286	0	0
7103	TSPAN8	protein_coding	4.63424	9.1078	9.51029	2.35388e-10	6.1675e-07	13.4942	0	0
6358	CCL14	protein_coding	1.61713	6.15447	9.22269	4.59465e-10	1.05338e-06	12.8778	0	0
216	ALDH1A1	protein_coding	7.07755	9.69834	8.98606	8.03133e-10	1.6367e-06	12.3613	0	0
8395	PIP5K1B	protein_coding	2.82416	7.17105	8.75156	1.40703e-09	2.282e-06	11.8411	0	0
4602	MYB	protein_coding	3.41735	9.20185	8.7271	1.49239e-09	2.282e-06	11.7864	1	0
84067	FAM160A2	protein_coding	1.11683	8.78664	8.72692	1.49303e-09	2.282e-06	11.786	0	0
54810	GIPC2	protein_coding	4.29171	9.01215	8.62165	1.92555e-09	2.71666e-06	11.5494	0	0
2122	MECOM	protein_coding	2.22833	7.45514	8.1463	6.18508e-09	8.10289e-06	10.4603	1	0
2762	GMDS	protein_coding	1.71628	10.3372	8.10744	6.81305e-09	8.33055e-06	10.3698	0	0
164091	PAQR7	protein_coding	-1.58376	6.62599	-7.84511	1.31535e-08	1.5078e-05	9.75303	0	0
2114	ETS2	protein_coding	2.98783	12.8941	7.71794	1.81517e-08	1.95835e-05	9.45046	1	0
200316	APOBEC3F	protein_coding	-1.47472	7.23982	-7.68383	1.97962e-08	2.01713e-05	9.36892	0	0
119467	CLRN3	protein_coding	4.52108	8.34826	7.6276	2.28459e-08	2.20535e-05	9.23415	0	0
9914	ATP2C2	protein_coding	2.8727	8.06855	7.48486	3.2927e-08	3.01957e-05	8.89001	0	0
58489	ABHD17C	protein_coding	2.2918	9.27467	7.39881	4.10931e-08	3.58899e-05	8.68121	0	0
5357	PLS1	protein_coding	1.97332	12.0723	7.37229	4.4e-08	3.66856e-05	8.61667	0	0
26278	SACS	protein_coding	-1.81601	8.54936	-7.33825	4.80525e-08	3.83188e-05	8.53366	0	0
5205	ATP8B1	protein_coding	4.07019	10.9439	7.22933	6.37382e-08	4.87092e-05	8.26705	0	0
7079	TIMP4	protein_coding	1.95222	6.36518	7.17647	7.31394e-08	5.3658e-05	8.13712	0	0
1627	DBN1	protein_coding	-1.0876	7.74635	-7.11167	8.66176e-08	5.83898e-05	7.97731	0	0
55160	ARHGEF10L	protein_coding	0.81072	6.4409	7.0958	9.02854e-08	5.83898e-05	7.93811	0	0
79170	PRR15L	protein_coding	3.29444	7.55049	7.07922	9.4288e-08	5.83898e-05	7.8971	0	0
120	ADD3	protein_coding	2.02717	11.5389	7.07875	9.44041e-08	5.83898e-05	7.89594	0	0
3491	CYR61	protein_coding	-2.63159	7.41584	-7.0589	9.9442e-08	5.83898e-05	7.84679	0	0
79370	BCL2L14	protein_coding	1.35384	6.09677	7.05449	1.00598e-07	5.83898e-05	7.83586	0	0
1800	DPEP1	protein_coding	4.57392	9.90794	7.04968	1.01874e-07	5.83898e-05	7.82394	0	0
10459	MAD2L2	protein_coding	-0.723051	7.65493	-7.02013	1.1008e-07	6.11813e-05	7.75068	0	0
4648	MYO7B	protein_coding	1.81661	6.60262	6.98094	1.22e-07	6.58191e-05	7.65332	0	0
6604	SMARCD3	protein_coding	-0.53047	5.51465	-6.95568	1.30395e-07	6.8331e-05	7.59046	0	0
1048	CEACAM5	protein_coding	6.8583	9.81604	6.90661	1.48385e-07	7.34993e-05	7.46815	0	0
219902	TMEM136	protein_coding	-1.93527	5.98835	-6.89505	1.53e-07	7.34993e-05	7.43929	0	0
84152	PPP1R1B	protein_coding	2.99131	7.82655	6.88883	1.5551e-07	7.34993e-05	7.42375	0	0
3931	LCAT	protein_coding	-1.00043	7.20215	-6.88694	1.56288e-07	7.34993e-05	7.41903	0	0
4069	LYZ	protein_coding	8.26079	10.8625	6.84833	1.73067e-07	7.93554e-05	7.32248	0	0
11035	RIPK3	protein_coding	1.49546	6.31196	6.83605	1.78775e-07	7.99734e-05	7.29175	0	0
5787	PTPRB	protein_coding	2.38632	6.77076	6.79048	2.0169e-07	8.66601e-05	7.17751	0	0
644844	PHGR1	protein_coding	2.03755	7.19362	6.78693	2.03597e-07	8.66601e-05	7.1686	0	0
54566	EPB41L4B	protein_coding	1.44012	9.00607	6.77904	2.07897e-07	8.66601e-05	7.14879	0	0
115677	NOSTRIN	protein_coding	2.04499	7.1825	6.7618	2.17623e-07	8.86982e-05	7.10548	0	0
23218	NBEAL2	protein_coding	0.99605	7.52799	6.71728	2.44925e-07	9.46299e-05	6.99348	0	0
3172	HNF4A	protein_coding	2.18358	8.53776	6.70745	2.51405e-07	9.46299e-05	6.96873	1	0
57214	CEMIP	protein_coding	4.56551	8.93889	6.70468	2.53263e-07	9.46299e-05	6.96175	0	0
80736	SLC44A4	protein_coding	4.33501	8.2168	6.69964	2.56675e-07	9.46299e-05	6.94907	0	0
4644	MYO5A	protein_coding	-2.98126	7.85983	-6.69775	2.58e-07	9.46299e-05	6.94428	0	0
23321	TRIM2	protein_coding	2.2871	9.72723	6.67853	2.71506e-07	9.76409e-05	6.89582	0	0
654502	IQCJ	protein_coding	-0.488108	5.44074	-6.66727	2.79765e-07	9.77581e-05	6.86741	0	0
493869	GPX8	protein_coding	-3.67216	7.88969	-6.66362	2.82492e-07	9.77581e-05	6.85821	0	0
79983	POF1B	protein_coding	6.30706	11.7022	6.63214	3.07208e-07	0.000103882	6.77868	0	0
[truncated: 18,287 more rows]

## Sheet: Table_S9
Differential expression analysis, miRNA (smallRNA sequencing data), colon-like versus undifferentiated cell lines
[truncated: 205 more rows]

[truncated: 5 more sheets: Table_S10, Table_S11, Table_S12, Table_S13, Table_S14]
